# Supplementary material for: Epigenetic remodelling licences adult cholangiocytes for organoid formation and liver regeneration
Source: Springer Nature journal article supplement (doi:10.1038/s41556-019-0402-6), 2019-11-01
Supplement: MOESM5 [file 41556_2019_402_MOESM5_ESM.xlsx]

## Sheet: 1.Summary
Sheet 1	Summary
Sheet 2	Differentially methylated regions at the TSS between undamaged and d3 damaged livers. In column D, Methylation/Hydroxymethylation difference. Positive value means loss of 5mC or 5hmC.
Sheet 3	Differentially methylated regions at the gene body between undamaged and d3 damaged livers. In column D, Methylation/Hydroxymethylation difference. Positive value means loss of 5mC or 5hmC
Sheet 4	Differentially methylated regions at the TSS between undamaged and d5 damaged livers. In column D, Methylation/Hydroxymethylation difference. Positive value means loss of 5mC or 5hmC
Sheet 5	Differentially methylated regions at the gene body between undamaged and d5 damaged livers. In column D, Methylation/Hydroxymethylation difference. Positive value means loss of 5mC or 5hmC
Sheet 6	Differentially methylated regions at the TSS between d5 and d3 damaged livers. In column D, Methylation/Hydroxymethylation difference. Positive value means loss of 5mC or 5hmC
Sheet 7	Differentially methylated regions at the gene body between d5and d3 damaged livers. In column D, Methylation/Hydroxymethylation difference. Positive value means loss of 5mC or 5hmC
Sheet 8	Up-regulated genes in vivo showing loss of cytosine modification (expressed as %) by WGBS at TSS (+/- 500bp)
Sheet 9	Up-regulated genes in vivo showing gain of cytosine modification (expressed as %) by WGBS at TSS (+/- 500bp)
Sheet 10	5hmC clustering and counts identified by RRHP at TSS (-2 +1 kb)
Sheet 11	577 TET1 targets showing differential 5hmC levels in vivo

## Sheet: 2. DMR d3 vs Healthy TSS
Differentially methylated regions (DMRs) at TSS between undamaged and day3 DDC-damaged livers from littermate controls. Genes with DMRs ≥25% are shown. Column D, Methylation/Hydroxymethylation difference, positive value means loss of 5mC or 5hmC
Chromosome	Start	End	Difference	Gene Name
NC_000070.6	152297238	152297573	-0.457754	Icmt
NC_000077.6	120721344	120721783	-0.381093	Rac3
NC_000078.6	33957425	33957989	-0.573488	Twist1
NC_000083.6	66448642	66449227	0.433184	Mtcl1
NC_000068.7	26021430	26021874	-0.496129	Ubac1
NC_000074.6	11497506	11497991	-0.453111	Carkd
NC_000068.7	125123293	125123683	-0.370849	LOC108168787
NC_000068.7	125123293	125123683	-0.370849	Myef2
NC_000075.6	23222943	23223355	-0.366959	Bmper
NC_000069.6	58576884	58577292	-0.370161	Selt
NC_000070.6	33248057	33248529	-0.431258	Pnrc1
NC_000070.6	117494281	117494814	0.413263	LOC102637578
NC_000072.6	148444110	148444427	0.366716	Tmtc1
NC_000082.6	38742107	38742525	-0.371785	B4galt4
NC_000081.6	80173524	80173927	-0.417776	Mgat3
NC_000067.6	134361765	134362168	-0.448036	Tmem183a
NC_000071.6	8622321	8622775	-0.371821	Rundc3b
NC_000071.6	142960848	142961160	-0.352699	Fscn1
NC_000076.6	70599460	70599807	-0.352076	LOC108167819
NC_000076.6	70599460	70599807	-0.352076	Phyhipl
NC_000067.6	30873455	30873725	0.457059	Phf3
NC_000078.6	32060827	32061184	-0.42199	Prkar2b
NC_000068.7	178413878	178414309	-0.400096	Fam217b
NC_000068.7	178413878	178414309	-0.400096	Ppp1r3d
NC_000068.7	13793350	13793759	-0.393185	St8sia6
NC_000082.6	97922154	97922551	-0.353396	C2cd2
NC_000082.6	21947277	21947769	-0.457449	Tmem41a
NC_000075.6	60713007	60713431	-0.389897	Larp6
NC_000077.6	33203205	33203552	-0.377164	Tlx3
NC_000075.6	70012466	70012846	-0.339621	Gtf2a2
NC_000073.6	67372680	67373120	-0.37651	Mef2a
NC_000072.6	119847886	119848244	-0.351454	3110021A11Rik
NC_000072.6	119847886	119848244	-0.351454	Erc1
NC_000074.6	79399225	79399475	-0.369756	Smad1
NC_000068.7	174328455	174328937	0.40126	Gm30189
NC_000067.6	60098348	60098816	-0.373154	Wdr12
NC_000067.6	60098348	60098816	-0.373154	Carf
NC_000068.7	80315453	80315771	-0.41774	Dnajc10
NC_000068.7	153529968	153530451	0.577747	Nol4l
NC_000073.6	127026187	127026633	0.466968	Maz
NC_000083.6	6782743	6783051	0.349086	Ezr
NC_000070.6	149737629	149737985	-0.40972	Tmem201
NC_000070.6	81442515	81442766	-0.366103	Mpdz
NC_000079.6	21813005	21814233	-0.404216	LOC108168067
NC_000071.6	146385235	146385475	-0.351562	Wasf3
NC_000073.6	19822405	19822761	-0.512428	Bcl3
NC_000071.6	110879692	110879851	-0.337979	Ttc28
NC_000083.6	87974945	87975218	0.420914	Msh6
NC_000072.6	122339322	122339637	-0.413631	Phc1
NC_000078.6	30373043	30373471	-0.45867	Sntg2
NC_000073.6	7298513	7298893	-0.427358	Mir5620
NC_000074.6	124897042	124897334	-0.392494	Sprtn
NC_000074.6	124897042	124897334	-0.392494	Exoc8
NC_000074.6	47674596	47674864	-0.419136	Ing2
NC_000073.6	82335250	82335530	-0.549661	Adamtsl3
NC_000068.7	90580167	90580437	0.396519	LOC108168775
NC_000068.7	90580167	90580437	0.396519	Ptprj
NC_000068.7	35109415	35109787	-0.347987	Cntrl
NC_000078.6	112679256	112679644	-0.381683	Zbtb42
NC_000075.6	50857012	50857373	-0.338456	Ppp2r1b
NC_000078.6	40037450	40037801	0.362895	Arl4aos
NC_000078.6	40037450	40037801	0.362895	Arl4a
NC_000074.6	106936062	106936357	-0.358172	Sntb2
NC_000084.6	25754125	25754424	-0.338459	Gm32896
NC_000084.6	25754125	25754424	-0.338459	Celf4
NC_000075.6	31030614	31030997	-0.366836	Zbtb44
NC_000079.6	110394743	110394999	-0.353788	Plk2
NC_000081.6	79804440	79804642	-0.362956	Nptxr
NC_000070.6	120746825	120747103	-0.357362	Kcnq4
NC_000076.6	39732369	39732688	-0.449523	Rev3l
NC_000076.6	39732369	39732688	-0.449523	E130307A14Rik
NC_000077.6	79711880	79712294	-0.3386	Mir193a
NC_000087.7	90828847	90829305	0.375402	LOC108168644
NC_000076.6	53597351	53597553	-0.357779	Asf1a
NC_000076.6	53597351	53597553	-0.357779	Gm3902
NC_000068.7	76675000	76675293	0.38438	Fkbp7
NC_000068.7	76675000	76675293	0.38438	Plekha3
NC_000068.7	76675000	76675293	0.38438	Gm39860
NC_000077.6	4947730	4947923	-0.384615	Ap1b1
NC_000077.6	4947730	4947923	-0.384615	Nefh
NC_000073.6	79464896	79465170	-0.425723	n-TRtcg5
NC_000073.6	134224651	134225018	-0.384367	Adam12
NC_000071.6	106925771	106926104	0.392114	Hfm1
NC_000073.6	35119426	35119675	-0.362831	Cebpa
NC_000085.6	46056596	46056888	-0.358952	Pprc1
NC_000068.7	165595096	165595280	-0.315765	Eya2
NC_000078.6	50649218	50649494	0.395254	Prkd1
NC_000079.6	103921572	103921809	0.357836	Erbb2ip
NC_000078.6	24651430	24651632	-0.39224	Klf11
NC_000077.6	119041242	119041578	-0.384178	Cbx8
NC_000074.6	84687427	84687690	-0.39503	Nacc1
NC_000070.6	48473029	48473226	-0.347437	Tex10
NC_000071.6	33434243	33434492	-0.409758	Nkx1-1
NC_000068.7	79635245	79635565	0.428925	Ssfa2
NC_000068.7	79635245	79635565	0.428925	LOC108168774
NC_000068.7	172345445	172345691	-0.378724	Fam210b
NC_000077.6	6006647	6006993	0.350909	Gm40812
NC_000075.6	72925281	72925509	0.334702	Pygo1
NC_000070.6	106678740	106678997	-0.41022	Ttc4
NC_000070.6	22487214	22487520	-0.332362	Pou3f2
NC_000073.6	4793307	4793693	-0.358871	Rpl28
NC_000077.6	80476565	80476754	-0.334729	Cdk5r1
NC_000073.6	81213659	81213766	-0.307855	Pde8a
NC_000073.6	46845717	46845941	-0.388623	Ldha
NC_000069.6	37348519	37348825	0.378815	Fgf2
NC_000082.6	5049421	5049749	-0.378703	Ubn1
NC_000082.6	5049421	5049749	-0.378703	Glyr1
NC_000086.7	37191094	37191349	-0.41967	Rnf113a1
NC_000086.7	37191094	37191349	-0.41967	Ndufa1
NC_000076.6	19592004	19592269	0.362389	Ifngr1
NC_000082.6	78376705	78376996	-0.427465	Btg3
NC_000070.6	103114745	103114882	-0.325853	Mier1
NC_000070.6	103114745	103114882	-0.325853	Wdr78
NC_000080.6	41264520	41264906	-0.452819	Gm2832
NC_000083.6	87447102	87447313	-0.397418	Calm2
NC_000074.6	93810557	93810822	-0.408428	Gnao1
NC_000077.6	77216192	77216431	0.356802	Ssh2
NC_000077.6	77216192	77216431	0.356802	Efcab5
NC_000071.6	145114488	145114792	-0.347472	Arpc1b
NC_000079.6	42052416	42052677	-0.383968	Hivep1
NC_000067.6	170215263	170215422	-0.336673	Uhmk1
NC_000076.6	5550467	5550839	-0.404708	Syne1
NC_000071.6	67607491	67607769	-0.389813	Shisa3
NC_000073.6	35119212	35119367	-0.348222	Cebpa
NC_000068.7	18998007	18998172	-0.368311	4930426L09Rik
NC_000068.7	18998007	18998172	-0.368311	Pip4k2a
NC_000086.7	136741986	136742206	-0.430678	BC065397
NC_000068.7	118901853	118901968	0.330502	Gm32957
NC_000072.6	148945807	148945999	-0.337019	3010003L21Rik
NC_000072.6	148945807	148945999	-0.337019	Fam60a
NC_000082.6	88289738	88290048	-0.49508	Grik1
NC_000067.6	164457753	164458081	-0.489788	Gm32391
NC_000067.6	164457753	164458081	-0.489788	Atp1b1
NC_000077.6	97766181	97766595	-0.376619	Cwc25
NC_000069.6	123447351	123447701	-0.379306	Prss12
NC_000077.6	82932678	82932827	-0.377147	Unc45bos
NC_000081.6	101224423	101224651	-0.330972	Grasp
NC_000081.6	101224423	101224651	-0.330972	A330009N23Rik
NC_000084.6	64661097	64661373	-0.375125	Atp8b1
NC_000075.6	72532131	72532237	-0.356034	Rfx7
NC_000075.6	72532131	72532237	-0.356034	4930509E16Rik
NC_000070.6	129820510	129820900	-0.579148	Ptp4a2
NC_000077.6	120949400	120949674	-0.43686	Slc16a3
NC_000069.6	57847593	57847798	-0.415534	Pfn2
NC_000074.6	4677689	4677854	0.38849	Gm6410
NC_000077.6	72489905	72490075	-0.335659	Spns2
NC_000076.6	78244317	78244496	0.340629	Trappc10
NC_000083.6	69382815	69382960	-0.486608	Zbtb14
NC_000067.6	75506257	75506463	-0.39122	Inha
NC_000067.6	75506257	75506463	-0.39122	Obsl1
NC_000077.6	74724256	74724407	-0.356493	Pafah1b1
NC_000074.6	123540506	123540802	-0.458661	n-R5s100
NC_000086.7	8145547	8145897	-0.510153	Rbm3os
NC_000086.7	8145547	8145897	-0.510153	Rbm3
NC_000068.7	180119246	180119353	-0.367459	Osbpl2
NC_000075.6	75625991	75626102	0.319889	Lysmd2
NC_000085.6	37699080	37699202	-0.36968	Gm32342
NC_000072.6	29179442	29179717	-0.380872	Prrt4
NC_000080.6	27622235	27622414	-0.432495	Erc2
NC_000076.6	81544972	81545049	0.314488	Gna11
NC_000083.6	25875529	25875714	0.378819	n-TGccc7
NC_000083.6	25875529	25875714	0.378819	0610011F06Rik
NC_000074.6	33929665	33929783	-0.337699	Rbpms
NC_000071.6	138997422	138997660	-0.340129	Pdgfa
NC_000074.6	124793260	124793381	-0.3659	Trim67
NC_000074.6	124793260	124793381	-0.3659	LOC108167561
NC_000068.7	167689503	167689585	-0.302846	Cebpb
NC_000068.7	167689503	167689585	-0.302846	A530013C23Rik
NC_000085.6	43440460	43440640	-0.35462	Cnnm1
NC_000080.6	25459088	25459178	-0.331525	Zmiz1
NC_000080.6	25459088	25459178	-0.331525	Zmiz1os1
NC_000084.6	34860704	34860913	-0.379577	Egr1
NC_000074.6	123653982	123654048	-0.33288	Gm35874
NC_000074.6	123653982	123654048	-0.33288	Rhou
NC_000070.6	133212348	133212456	-0.325808	Gpr3
NC_000081.6	39197979	39198159	-0.369541	Rims2
NC_000067.6	39577223	39577325	-0.344649	Rnf149
NC_000077.6	22971841	22972132	-0.393232	Zrsr1
NC_000082.6	11253788	11253930	0.347264	Gspt1
NC_000082.6	11253788	11253930	0.347264	Mir1945
NC_000080.6	46883002	46883131	-0.325114	Samd4
NC_000080.6	46883002	46883131	-0.325114	Gm34934
NC_000082.6	38484116	38484392	-0.345269	Gm41453
NC_000073.6	79148876	79149030	-0.336342	Mfge8
NC_000085.6	59459251	59459404	-0.351772	Emx2os
NC_000085.6	59459251	59459404	-0.351772	Emx2
NC_000069.6	52269145	52269283	-0.355292	Foxo1
NC_000075.6	70207582	70207732	-0.330498	Myo1e
NC_000068.7	30171414	30171581	-0.353299	Endog
NC_000078.6	84875602	84875790	-0.338143	D030025P21Rik
NC_000068.7	157424301	157424421	0.401937	Src
NC_000070.6	150147615	150147756	-0.467147	Slc2a7
NC_000086.7	155623903	155624194	-0.432702	LOC102639025
NC_000086.7	155623903	155624194	-0.432702	Ptchd1
NC_000076.6	79988382	79988543	0.353886	Cnn2
NC_000070.6	57956375	57956477	-0.364171	Gm35344
NC_000070.6	57956375	57956477	-0.364171	Txn1
NC_000073.6	144582178	144582307	-0.364843	Fadd
NC_000067.6	171360107	171360338	-0.437884	Klhdc9
NC_000077.6	98412602	98412725	-0.308719	Erbb2
NC_000068.7	48814349	48814423	-0.342848	Acvr2a
NC_000080.6	64652718	64652803	-0.33636	Kif13b
NC_000085.6	4625543	4625637	-0.328678	Mir6986
NC_000085.6	4625543	4625637	-0.328678	Rce1
NC_000071.6	127241443	127241629	-0.363231	Tmem132c
NC_000070.6	155222573	155222686	-0.341458	Ski
NC_000069.6	85971079	85971208	0.345617	Sh3d19
NC_000085.6	53600837	53600978	-0.332753	Smc3
NC_000082.6	18587062	18587237	-0.377622	Gm35369
NC_000074.6	104309804	104310063	-0.364006	Cmtm1
NC_000076.6	89685876	89686021	-0.357809	1500026H17Rik
NC_000076.6	89685876	89686021	-0.357809	Scyl2
NC_000084.6	57878884	57878996	-0.375995	Slc12a2
NC_000075.6	50617194	50617300	-0.343352	Pih1d2
NC_000075.6	50617194	50617300	-0.343352	AU019823
NC_000073.6	65370890	65371031	-0.35432	Gm33068
NC_000069.6	51341608	51341863	-0.367867	Elf2
NC_000078.6	16810871	16810938	-0.331501	E2f6
NC_000073.6	126503032	126503120	-0.331775	Atxn2l
NC_000073.6	126503032	126503120	-0.331775	LOC105243053
NC_000068.7	174284534	174284750	-0.391175	Gnas
NC_000069.6	152346589	152346717	-0.320578	Usp33
NC_000074.6	83973089	83973169	-0.388964	Prkaca
NC_000085.6	25236705	25236801	-0.331308	Kank1
NC_000072.6	113469855	113469967	-0.336656	Il17rc
NC_000079.6	96132423	96132572	-0.378677	Gm29543
NC_000079.6	96132423	96132572	-0.378677	Sv2c
NC_000072.6	59208786	59208895	-0.324457	Tigd2
NC_000069.6	87906624	87906735	-0.376115	Hdgf
NC_000068.7	132577511	132577688	-0.365049	Gpcpd1
NC_000070.6	132261039	132261235	-0.392049	Gm28874
NC_000070.6	132261039	132261235	-0.392049	Gmeb1
NC_000080.6	51913711	51914081	-0.435419	Ndrg2
NC_000081.6	34306788	34306920	-0.34916	Matn2
NC_000078.6	69893121	69893193	-0.353348	Atl1
NC_000078.6	69893121	69893193	-0.353348	Map4k5
NC_000080.6	111676094	111676339	-0.445356	Gm30439
NC_000080.6	111676094	111676339	-0.445356	Slitrk5
NC_000068.7	151009276	151009355	-0.334836	Ninl
NC_000086.7	43428409	43428583	0.528794	Tenm1
NC_000069.6	67463758	67463927	-0.419199	Lxn
NC_000086.7	6172089	6172374	-0.628053	Nudt10
NC_000075.6	86464543	86464608	-0.342729	Ube2cbp
NC_000068.7	84715056	84715158	-0.343781	Gm32289
NC_000068.7	84715056	84715158	-0.343781	Zdhhc5
NC_000073.6	143460626	143460750	-0.344691	Cdkn1c
NC_000067.6	165460022	165460096	-0.327937	Mpc2
NC_000067.6	165460022	165460096	-0.327937	Dcaf6
NC_000085.6	5406381	5406544	-0.318202	4930481A15Rik
NC_000085.6	6979767	6979912	-0.385382	Gm41803
NC_000085.6	6979767	6979912	-0.385382	Fkbp2
NC_000067.6	133046583	133046661	-0.354501	Pik3c2b
NC_000077.6	98358431	98358610	-0.371321	Stard3
NC_000077.6	98358431	98358610	-0.371321	1700003D09Rik
NC_000078.6	23969169	23969223	-0.358227	Gm17330
NC_000073.6	81571628	81571684	-0.310723	Whamm
NC_000075.6	40686075	40686204	-0.414029	Clmp
NC_000071.6	123394448	123394589	-0.406551	Mlxip
NC_000077.6	98412423	98412485	-0.320299	Erbb2
NC_000083.6	32283953	32284034	-0.364208	Brd4
NC_000077.6	106788016	106788126	-0.439321	Cep95
NC_000076.6	128695932	128696038	-0.345037	Rab5b
NC_000067.6	13374231	13374349	0.412083	Ncoa2
NC_000068.7	25272524	25272665	-0.383132	Anapc2
NC_000068.7	25272524	25272665	-0.383132	Ssna1
NC_000071.6	121398037	121398097	-0.349414	Naa25
NC_000086.7	20425463	20425652	-0.583036	Jade3
NC_000067.6	130715714	130715863	-0.364691	Yod1
NC_000077.6	79993283	79993412	0.398589	Suz12
NC_000070.6	63171368	63171423	-0.348465	Kif12
NC_000072.6	125096252	125096315	0.332945	Chd4
NC_000072.6	125096252	125096315	0.332945	Mir7045
NC_000070.6	43506035	43506327	-0.392261	Car9
NC_000073.6	40899217	40899273	-0.343299	Vstm2b
NC_000073.6	40899217	40899273	-0.343299	A230077H06Rik
NC_000071.6	53998895	53998952	-0.347564	Stim2
NC_000084.6	35772236	35772336	0.332373	Ube2d2a
NC_000071.6	106695922	106695993	-0.369141	Zfp644
NC_000074.6	78437983	78438074	-0.394304	Pou4f2
NC_000074.6	88362167	88362227	-0.38133	Brd7
NC_000072.6	30958944	30959047	-0.436987	Klf14
NC_000068.7	39226402	39226492	-0.388343	Ppp6c
NC_000086.7	7572604	7572888	-0.445983	Ppp1r3fos
NC_000077.6	77983180	77983348	-0.383432	Phf12
NC_000068.7	75831973	75832090	0.363012	Agps
NC_000068.7	75831973	75832090	0.363012	Gm34861
NC_000073.6	19920584	19920654	-0.398093	Pvr
NC_000068.7	146512212	146512266	-0.400476	Ralgapa2
NC_000079.6	112987796	112987849	-0.341493	Ccno
NC_000079.6	105293931	105294014	-0.337871	Rnf180
NC_000067.6	38627963	38628192	-0.410022	Aff3
NC_000071.6	146385536	146385593	-0.351174	Wasf3
NC_000067.6	168432345	168432557	-0.349759	Pbx1
NC_000075.6	123215377	123215445	-0.362914	Cdcp1
NC_000081.6	7810367	7810441	-0.348869	Gdnf
NC_000078.6	12766618	12766946	-0.430441	Gm35104
NC_000077.6	102147411	102147493	0.357826	Gm11586
NC_000067.6	86018290	86018344	-0.348463	Spata3
NC_000079.6	38346177	38346246	-0.344339	Bmp6
NC_000074.6	31111879	31111941	-0.380872	Rnf122
NC_000081.6	97055037	97055107	-0.36053	Slc38a4
NC_000078.6	112588645	112588729	-0.326984	Inf2
NC_000079.6	9094344	9094466	-0.337726	Larp4b
NC_000074.6	26439180	26439422	0.460165	Gm31898
NC_000070.6	150119173	150119318	0.433409	Slc2a5
NC_000077.6	102989492	102989671	-0.403971	Gm34620
NC_000077.6	74610622	74610734	-0.375354	Rap1gap2
NC_000072.6	88724156	88724249	-0.363237	Mgll
NC_000068.7	31887596	31887700	-0.364387	Lamc3
NC_000075.6	70207466	70207521	-0.311695	Myo1e
NC_000074.6	87958853	87958908	-0.366142	Zfp423
NC_000068.7	160646171	160646227	-0.370065	Top1
NC_000075.6	55049076	55049265	-0.385095	Chrnb4
NC_000082.6	85215511	85215647	-0.418395	Gm41482
NC_000071.6	115507044	115507135	-0.376889	Pxn
NC_000067.6	36557381	36557453	-0.376818	Sema4c
NC_000074.6	119633373	119633486	0.401269	LOC108167557
NC_000068.7	174295026	174295140	-0.385446	Nespas
NC_000083.6	8371868	8372076	0.435393	T2
NC_000074.6	33516954	33517022	-0.409274	Tex15
NC_000086.7	74428513	74428589	-0.411383	G6pdx
NC_000076.6	12964630	12964686	-0.349206	Stx11
NC_000068.7	150903609	150903878	-0.425999	Abhd12
NC_000078.6	99964446	99964498	-0.339275	Kcnk13
NC_000085.6	53754347	53754513	0.542744	Gm30943
NC_000070.6	129059284	129059365	0.563882	1700086P04Rik
NC_000068.7	168980857	168980995	-0.471545	Gm33622
NC_000079.6	112001591	112001798	-0.405238	Gm15323
NC_000068.7	174415400	174415573	-0.38176	Nelfcd
NC_000074.6	45507754	45507823	-0.348172	Sorbs2
NC_000068.7	18048777	18048863	-0.380778	Skida1
NC_000085.6	5406691	5406743	-0.322625	4930481A15Rik
NC_000084.6	84087844	84087923	-0.440555	Zadh2
NC_000084.6	84087844	84087923	-0.440555	Tshz1
NC_000075.6	27030965	27031037	-0.330002	Ncapd3
NC_000075.6	27030965	27031037	-0.330002	Vps26b
NC_000077.6	5707780	5707864	-0.343884	Mrps24
NC_000085.6	5425044	5425103	-0.323	AI837181
NC_000085.6	5425044	5425103	-0.323	Drap1
NC_000085.6	45146694	45146759	-0.784833	Gm35923
NC_000086.7	105152192	105152276	-0.402677	Gm33605
NC_000073.6	70367785	70367931	-0.382123	Nr2f2
NC_000075.6	123215245	123215308	-0.342696	Cdcp1
NC_000073.6	101539989	101540119	-0.401416	Gm35363
NC_000086.7	73774351	73774493	-0.558762	Srpk3
NC_000071.6	139736495	139736553	-0.347522	Micall2
NC_000068.7	172544150	172544231	-0.521896	Tfap2c
NC_000072.6	43442713	43442931	-0.449018	9430018G01Rik
NC_000074.6	69183009	69183300	-0.502663	Lzts1
NC_000067.6	72004957	72005026	-0.50923	4933417E11Rik
NC_000084.6	49755074	49755154	-0.43447	Gm16283
NC_000084.6	49755074	49755154	-0.43447	Dtwd2
NC_000073.6	45417142	45417285	-0.461637	Lhb
NC_000067.6	83407647	83407697	-0.411873	Sphkap
NC_000081.6	72810192	72810276	-0.394107	Peg13
NC_000087.7	84563103	84563200	0.665856	LOC108168579
NC_000067.6	161766786	161766889	-0.426718	Gm31869
NC_000086.7	25301030	25301129	0.537988	Gm5169
NC_000086.7	36597075	36597300	-0.453907	Pgrmc1
NC_000074.6	27040859	27040923	-0.406034	Prosc
NC_000085.6	8664354	8664448	-0.589545	Chrm1
NC_000085.6	8664354	8664448	-0.589545	9830166K06Rik
NC_000069.6	31038455	31038516	0.453319	Mir7008
NC_000072.6	48421212	48421309	-0.655204	Gm38803
NC_000077.6	87876012	87876079	-0.431058	Epx
NC_000071.6	90366158	90366242	-0.41222	Gm9958
NC_000071.6	90366158	90366242	-0.41222	Ankrd17
NC_000068.7	32783990	32784088	-0.529943	Cfap157
NC_000067.6	132196469	132196598	-0.493684	Mir135b
NC_000086.7	141725193	141725244	-0.34435	Irs4
NT_166434.1	225268	225359	0.606721	LOC101055676
NC_000082.6	93607186	93607269	0.456596	Cbr1
NC_000077.6	48870736	48870798	-0.558332	Irgm1
NC_000072.6	24957095	24957190	0.525638	Tmem229a
NC_000086.7	140775073	140775210	0.483079	Eif2c5
NC_000079.6	55426324	55426442	-0.488916	F12
NC_000073.6	41208192	41208263	-0.634365	Gm6866
NC_000076.6	128412884	128412970	-0.591592	Nabp2
NC_000068.7	152081231	152081296	0.495722	Scrt2
NC_000068.7	152081231	152081296	0.495722	AA387200
NC_000071.6	124031188	124031239	-0.415917	Gm34086
NT_039373.1	37289	37389	-0.662964	LOC105247310
NC_000069.6	93652349	93652478	-0.454222	Tdpoz2
NC_000070.6	145197043	145197105	-0.477561	Vps13d
NC_000073.6	73238966	73239065	0.591605	Gm30075
NC_000078.6	88722304	88722398	-0.486566	Nrxn3

## Sheet: 3. DMR d3 vs Healthy Gene Body
Differentially methylated regions (DMRs) at geen body between undamaged and day3 DDC-damaged livers from littermate controls. Genes with DMRs ≥25% are shown. Column D, Methylation/Hydroxymethylation difference, positive value means loss of 5mC or 5hmC
Chromosome	Start	End	Difference	Gene Name
NC_000085.6	45146694	45146759	-0.784833	Name=Gm35923
NC_000069.6	108301074	108301154	-0.709304	Name=Sort1
NC_000078.6	23567164	23567256	-0.704383	Name=Gm40862
NC_000078.6	34860515	34860671	-0.692231	Name=Hdac9
NC_000074.6	94620257	94620728	-0.690419	Name=Rspry1
NT_039373.1	37289	37389	-0.662964	Name=LOC105247310
NC_000072.6	145544491	145544754	-0.651652	Name=Gm38475
NC_000086.7	75873744	75873990	-0.644645	Name=Pls3
NC_000073.6	116279635	116279707	-0.643612	Name=Plekha7
NC_000073.6	59880300	59880385	-0.637181	Name=LOC102640292
NC_000073.6	41208192	41208263	-0.634365	Name=Gm34811
NC_000086.7	6172089	6172374	-0.628053	Name=Nudt10
NC_000086.7	6172089	6172374	-0.628053	Name=Gm33733
NC_000068.7	50105766	50105894	-0.613894	Name=Lypd6
NT_187026.1	324185	324300	-0.608823	Name=Slc16a13
NC_000074.6	16046349	16046440	-0.60866	Name=Csmd1
NC_000071.6	27111219	27111394	-0.605529	Name=Dpp6
NC_000082.6	95211852	95212150	-0.604439	Name=Gm31641
NC_000072.6	146425155	146425248	-0.593181	Name=Itpr2
NC_000076.6	128412884	128412970	-0.591592	Name=Rnf41
NC_000085.6	8664354	8664448	-0.589545	Name=Chrm1
NC_000086.7	20425463	20425652	-0.583036	Name=Jade3
NC_000081.6	84440997	84441185	-0.58195	Name=LOC108168252
NC_000081.6	84440997	84441185	-0.58195	Name=1810041L15Rik
NC_000070.6	129820510	129820900	-0.579148	Name=Ptp4a2
NC_000076.6	90122248	90122309	-0.574115	Name=Anks1b
NC_000078.6	33957425	33957989	-0.573488	Name=Twist1
NC_000086.7	53713741	53713836	-0.573374	Name=AW822252
NC_000081.6	55871506	55871612	-0.571235	Name=Sntb1
NC_000075.6	114242056	114242140	-0.570475	Name=4921528I07Rik
NC_000086.7	159442499	159442585	-0.569011	Name=Map7d2
NC_000071.6	48766749	48766848	-0.568294	Name=Kcnip4
NC_000068.7	151209749	151209838	-0.567809	Name=Gm14149
NC_000073.6	131224781	131224993	-0.566935	Name=5430419D17Rik
NC_000067.6	175339110	175339201	-0.566313	Name=Rgs7
NC_000077.6	87783394	87783452	-0.566107	Name=Bzrap1
NC_000077.6	87783394	87783452	-0.566107	Name=Gm34064
NC_000087.7	14423115	14423210	-0.560032	Name=Gm30737
NC_000077.6	41747695	41747755	-0.559552	Name=LOC102637814
NC_000086.7	73774351	73774493	-0.558762	Name=Srpk3
NC_000077.6	48870736	48870798	-0.558332	Name=Irgm1
NC_000086.7	13576804	13576876	-0.556321	Name=Gm34836
NC_000086.7	13576804	13576876	-0.556321	Name=Cask
NC_000086.7	82944306	82944526	-0.555607	Name=Dmd
NC_000086.7	83766913	83767020	-0.553043	Name=Dmd
NC_000073.6	19769393	19769492	-0.552945	Name=Gm34744
NC_000073.6	19769393	19769492	-0.552945	Name=Bcam
NC_000078.6	87085638	87085796	-0.552068	Name=Tmem63c
NC_000073.6	82335250	82335530	-0.549661	Name=Adamtsl3
NC_000070.6	44172758	44172872	-0.547205	Name=Rnf38
NC_000086.7	138927649	138927807	-0.544972	Name=Nrk
NC_000086.7	123604542	123604599	-0.544869	Name=Cldn34c2
NC_000077.6	97552178	97552449	-0.543914	Name=Srcin1
NC_000082.6	72392809	72393057	-0.540817	Name=Robo1
NC_000072.6	110754506	110754618	-0.539583	Name=Grm7
NC_000077.6	35568834	35568965	-0.538157	Name=Slit3
NC_000086.7	60933370	60933464	-0.530361	Name=Gm38438
NC_000071.6	24550953	24551241	-0.53018	Name=4931409K22Rik
NC_000068.7	32783990	32784088	-0.529943	Name=Cfap157
NC_000086.7	83508594	83508653	-0.526607	Name=Dmd
NC_000070.6	63742160	63742341	-0.5258	Name=Tnfsf15
NC_000070.6	63742160	63742341	-0.5258	Name=Gm42295
NC_000071.6	141986696	141986752	-0.525696	Name=Sdk1
NC_000079.6	35759410	35759462	-0.521442	Name=Cdyl
NC_000074.6	126109582	126109941	-0.520595	Name=LOC108167586
NC_000075.6	114371919	114371976	-0.518734	Name=4930520O04Rik
NC_000086.7	77869000	77869079	-0.518599	Name=Gm14744
NC_000075.6	114775461	114775674	-0.518198	Name=Cmtm7
NC_000068.7	156475872	156475983	-0.517465	Name=Epb41l1
NC_000082.6	7015421	7015479	-0.517071	Name=Rbfox1
NC_000073.6	144678058	144678228	-0.515845	Name=Ano1
NC_000073.6	19822405	19822761	-0.512428	Name=Bcl3
NC_000086.7	8145547	8145897	-0.510153	Name=Rbm3os
NC_000086.7	8145547	8145897	-0.510153	Name=Rbm3
NT_187059.1	918350	918400	-0.509341	Name=LOC620639
NC_000067.6	72004957	72005026	-0.50923	Name=4933417E11Rik
NC_000082.6	27392053	27392113	-0.508194	Name=Ccdc50
NC_000072.6	45880401	45880533	-0.507869	Name=Cntnap2
NC_000079.6	63203559	63203749	-0.507414	Name=2010111I01Rik
NC_000081.6	78432894	78433167	-0.505718	Name=Kctd17
NC_000081.6	9688898	9689221	-0.505621	Name=Spef2
NC_000076.6	75666624	75666731	-0.505597	Name=Cabin1
NC_000070.6	152343434	152343505	-0.505592	Name=Chd5
NC_000082.6	4783098	4783149	-0.503281	Name=Cdip1
NC_000071.6	125056922	125057293	-0.503223	Name=Ncor2
NC_000074.6	69183009	69183300	-0.502663	Name=Lzts1
NC_000073.6	56338717	56338822	-0.501691	Name=Oca2
NC_000086.7	59277499	59277561	-0.500737	Name=Fgf13
NC_000068.7	141265682	141265767	-0.500168	Name=Macrod2
NC_000075.6	13447024	13447162	-0.500044	Name=Maml2
NC_000067.6	78679265	78679446	-0.497595	Name=Acsl3
NC_000068.7	26021430	26021874	-0.496129	Name=Ubac1
NC_000078.6	9031309	9031507	-0.495446	Name=Ttc32
NC_000082.6	88289738	88290048	-0.49508	Name=Grik1
NC_000067.6	132196469	132196598	-0.493684	Name=Gm29695
NC_000067.6	132196469	132196598	-0.493684	Name=Lemd1
NC_000076.6	107626628	107626828	-0.490136	Name=Gm36177
NC_000076.6	107626628	107626828	-0.490136	Name=Ptprq
NC_000067.6	164457753	164458081	-0.489788	Name=Atp1b1
NC_000077.6	85841856	85842281	-0.48939	Name=Tbx2
NC_000079.6	55426324	55426442	-0.488916	Name=F12
NC_000072.6	100063166	100063326	-0.488582	Name=Gm33243
NC_000077.6	11755524	11755603	-0.488457	Name=Ikzf1
NC_000077.6	39624146	39624217	-0.488443	Name=Gm33963
NC_000083.6	75478345	75478437	-0.48713	Name=Rasgrp3
NC_000083.6	69382815	69382960	-0.486608	Name=A930029G22Rik
NC_000083.6	69382815	69382960	-0.486608	Name=Zbtb14
NC_000086.7	42604027	42604261	-0.485248	Name=Tenm1
NC_000074.6	14642871	14643005	-0.48483	Name=Dlgap2
NC_000083.6	28910187	28910307	-0.483195	Name=4930539E08Rik
NC_000078.6	87183137	87183353	-0.479204	Name=Tmed8
NC_000078.6	87183137	87183353	-0.479204	Name=Gm40496
NC_000070.6	101379973	101380194	-0.479065	Name=0610043K17Rik
NC_000086.7	59388858	59389078	-0.477524	Name=Fgf13
NC_000072.6	30238250	30238311	-0.476802	Name=Ube2h
NC_000071.6	6998342	6998420	-0.476124	Name=Zfp804b
NC_000070.6	58911588	58911914	-0.474545	Name=AI314180
NC_000080.6	52254166	52254484	-0.474272	Name=Chd8
NC_000075.6	63743406	63743507	-0.473728	Name=Smad3
NC_000077.6	70675581	70675714	-0.47357	Name=Camta2
NC_000074.6	20913081	20913232	-0.473006	Name=Gm6040
NC_000086.7	69831336	69831446	-0.471997	Name=Aff2
NC_000068.7	168980857	168980995	-0.471545	Name=Gm33622
NC_000077.6	43988353	43988424	-0.470906	Name=Gm12153
NC_000069.6	110016074	110016233	-0.470879	Name=Ntng1
NC_000081.6	35846814	35847045	-0.470679	Name=Vps13b
NC_000077.6	108209086	108209154	-0.467756	Name=Prkca
NC_000079.6	105133014	105133252	-0.467306	Name=Rnf180
NC_000068.7	174286752	174287322	-0.46702	Name=Nespas
NC_000068.7	174286752	174287322	-0.46702	Name=Gnas
NC_000079.6	46888670	46888786	-0.466115	Name=Kif13a
NC_000071.6	121731817	121731921	-0.463929	Name=Atxn2
NC_000084.6	42979084	42979207	-0.462692	Name=Ppp2r2b
NC_000073.6	45417142	45417285	-0.461637	Name=Ntf5
NC_000072.6	141474874	141475100	-0.460339	Name=Pde3a
NC_000080.6	54098281	54098357	-0.459666	Name=Gm30275
NC_000082.6	26056367	26056443	-0.459663	Name=P3h2
NC_000068.7	105680624	105680748	-0.459397	Name=Pax6
NC_000077.6	33734743	33734857	-0.459029	Name=Kcnip1
NC_000078.6	30373043	30373471	-0.45867	Name=Sntg2
NC_000070.6	46732622	46732822	-0.458257	Name=Gabbr2
NC_000070.6	152297238	152297573	-0.457754	Name=Icmt
NC_000082.6	21947277	21947769	-0.457449	Name=Tmem41a
NC_000071.6	119643686	119643934	-0.454433	Name=Tbx3os1
NC_000071.6	36365452	36365636	-0.454423	Name=Sorcs2
NC_000086.7	38442135	38442337	-0.454302	Name=Lamp2
NC_000069.6	93652349	93652478	-0.454222	Name=Tdpoz2
NC_000074.6	11497506	11497991	-0.453111	Name=Carkd
NC_000080.6	41264520	41264906	-0.452819	Name=Gm2832
NC_000069.6	86787156	86787408	-0.452507	Name=Dclk2
NC_000072.6	145768843	145768926	-0.452262	Name=Rassf8
NC_000071.6	27048846	27048929	-0.450578	Name=Dpp6
NC_000080.6	28188813	28188969	-0.450203	Name=Erc2
NC_000076.6	39732369	39732688	-0.449523	Name=Rev3l
NC_000072.6	43442713	43442931	-0.449018	Name=9430018G01Rik
NC_000072.6	43442713	43442931	-0.449018	Name=Tpk1
NC_000080.6	16684947	16685054	-0.448356	Name=Rarb
NC_000078.6	61838319	61838446	-0.44814	Name=Lrfn5
NC_000067.6	134361765	134362168	-0.448036	Name=Tmem183a
NC_000074.6	104877421	104877500	-0.447338	Name=Gm33141
NC_000080.6	76487728	76488137	-0.446611	Name=Tsc22d1
NC_000086.7	7572604	7572888	-0.445983	Name=Ppp1r3f
NC_000080.6	111676094	111676339	-0.445356	Name=Slitrk5
NC_000072.6	119674936	119675062	-0.444496	Name=Erc1
NC_000071.6	104439202	104439482	-0.444068	Name=Spp1
NC_000074.6	9676228	9676413	-0.443945	Name=Fam155a
NC_000075.6	36915136	36915215	-0.441781	Name=Pknox2
NC_000070.6	144673265	144673335	-0.44077	Name=Gm436
NC_000084.6	84087844	84087923	-0.440555	Name=Zadh2
NC_000072.6	29718111	29718217	-0.440505	Name=Tspan33
NC_000080.6	21550185	21550381	-0.43938	Name=Kat6b
NC_000077.6	106788016	106788126	-0.439321	Name=Ddx5
NC_000077.6	29765142	29765249	-0.438999	Name=Eml6
NC_000070.6	148833230	148833335	-0.438879	Name=Casz1
NC_000086.7	160418376	160418445	-0.438141	Name=Adgrg2
NC_000067.6	171360107	171360338	-0.437884	Name=Klhdc9
NC_000072.6	30958944	30959047	-0.436987	Name=Klf14
NC_000077.6	120949400	120949674	-0.43686	Name=Slc16a3
NC_000080.6	51913711	51914081	-0.435419	Name=Ndrg2
NC_000078.6	106839832	106839903	-0.434494	Name=Gm40569
NC_000084.6	49755074	49755154	-0.43447	Name=Dtwd2
NC_000071.6	114702962	114703017	-0.433903	Name=Gm34931
NC_000085.6	57828366	57828600	-0.433703	Name=Atrnl1
NC_000074.6	22871610	22871675	-0.433661	Name=Kat6a
NC_000068.7	49655623	49655806	-0.43352	Name=Kif5c
NC_000068.7	71350475	71350552	-0.43282	Name=Slc25a12
NC_000086.7	155623903	155624194	-0.432702	Name=Ptchd1
NC_000080.6	27622235	27622414	-0.432495	Name=Erc2
NC_000080.6	4855951	4856060	-0.43168	Name=Gm3264
NC_000080.6	4855951	4856060	-0.43168	Name=Gm26650
NC_000070.6	33248057	33248529	-0.431258	Name=Pnrc1
NC_000083.6	47493562	47493727	-0.430935	Name=Taf8
NC_000086.7	136741986	136742206	-0.430678	Name=Morf4l2
NC_000086.7	162035591	162035747	-0.430611	Name=Nhs
NC_000078.6	12766618	12766946	-0.430441	Name=Gm35104
NC_000076.6	89722247	89722330	-0.430003	Name=Actr6
NC_000073.6	29443789	29443964	-0.428214	Name=Sipa1l3
NC_000068.7	152920549	152920645	-0.427941	Name=Mylk2
NC_000067.6	53583454	53583534	-0.427911	Name=Dnah7a
NC_000082.6	78376705	78376996	-0.427465	Name=Btg3
NC_000073.6	7298513	7298893	-0.427358	Name=Mir5620
NC_000073.6	7298513	7298893	-0.427358	Name=Clcn4
NC_000077.6	113172895	113173234	-0.427121	Name=2610035D17Rik
NC_000067.6	161766786	161766889	-0.426718	Name=Gm31869
NC_000068.7	150903609	150903878	-0.425999	Name=Abhd12
NC_000073.6	79464896	79465170	-0.425723	Name=Polg
NC_000085.6	48231801	48232258	-0.425214	Name=Sorcs3
NC_000070.6	139556032	139556421	-0.423404	Name=Iffo2
NC_000079.6	63431760	63432048	-0.423377	Name=Fancc
NC_000078.6	32060827	32061184	-0.42199	Name=Prkar2b
NC_000078.6	75320740	75320846	-0.421374	Name=Rhoj
NC_000076.6	60495156	60495271	-0.420289	Name=Cdh23
NC_000067.6	135739584	135739647	-0.42025	Name=Csrp1
NC_000080.6	47402703	47402975	-0.419715	Name=Dlgap5
NC_000086.7	37191094	37191349	-0.41967	Name=Ndufa1
NC_000086.7	37191094	37191349	-0.41967	Name=Rnf113a1
NC_000081.6	8444188	8444405	-0.419538	Name=LOC102634078
NC_000081.6	8444188	8444405	-0.419538	Name=Nipbl
NC_000077.6	5897206	5897291	-0.41946	Name=Myl7
NC_000069.6	67463758	67463927	-0.419199	Name=Lxn
NC_000069.6	67463758	67463927	-0.419199	Name=Gfm1
NC_000074.6	47674596	47674864	-0.419136	Name=Ing2
NC_000082.6	85215511	85215647	-0.418395	Name=Gm41482
NC_000071.6	69532218	69532356	-0.418206	Name=Yipf7
NC_000081.6	80173524	80173927	-0.417776	Name=Mgat3
NC_000068.7	80315453	80315771	-0.41774	Name=Dnajc10
NC_000071.6	124031188	124031239	-0.415917	Name=Vps37b
NC_000082.6	38376416	38376560	-0.415835	Name=Popdc2
NC_000069.6	57847593	57847798	-0.415534	Name=Pfn2
NC_000075.6	40686075	40686204	-0.414029	Name=Clmp
NC_000072.6	4749244	4749483	-0.413926	Name=Peg10
NC_000086.7	96716279	96716355	-0.413679	Name=Gpr165
NC_000072.6	122339322	122339637	-0.413631	Name=Phc1
NC_000083.6	56413211	56413459	-0.413619	Name=Ptprs
NC_000074.6	120559906	120559991	-0.41252	Name=Gse1
NC_000083.6	47759702	47759814	-0.412315	Name=Tfeb
NC_000071.6	90366158	90366242	-0.41222	Name=Ankrd17
NC_000067.6	83407647	83407697	-0.411873	Name=Sphkap
NC_000086.7	74428513	74428589	-0.411383	Name=G6pdx
NC_000086.7	74428513	74428589	-0.411383	Name=Ikbkg
NC_000075.6	121351485	121351567	-0.410652	Name=Trak1
NC_000070.6	106678740	106678997	-0.41022	Name=Ttc4
NC_000067.6	38627963	38628192	-0.410022	Name=Aff3
NC_000073.6	113774299	113774383	-0.409993	Name=Spon1
NC_000070.6	149737629	149737985	-0.40972	Name=Tmem201
NC_000074.6	33516954	33517022	-0.409274	Name=Tex15
NC_000069.6	108367356	108367492	-0.408566	Name=Mybphl
NC_000074.6	93810557	93810822	-0.408428	Name=Gnao1
NC_000077.6	103198947	103199269	-0.408349	Name=1700023F06Rik
NC_000069.6	90541140	90541338	-0.407184	Name=S100a16
NC_000084.6	7609285	7609458	-0.405536	Name=Mpp7
NC_000084.6	80240186	80240277	-0.405317	Name=Hsbp1l1
NC_000079.6	112001591	112001798	-0.405238	Name=Gm15322
NC_000079.6	112001591	112001798	-0.405238	Name=Gm15323
NC_000083.6	45805811	45806187	-0.404897	Name=LOC108168357
NC_000076.6	5550467	5550839	-0.404708	Name=Syne1
NC_000079.6	21813005	21814233	-0.404216	Name=LOC108168067
NC_000073.6	141079857	141080054	-0.403992	Name=Pkp3
NC_000083.6	84571548	84571952	-0.403511	Name=Plekhh2
NC_000086.7	105152192	105152276	-0.402677	Name=Gm33605
NC_000086.7	105152192	105152276	-0.402677	Name=LOC108167322
NC_000077.6	6526930	6527192	-0.402639	Name=Snhg15
NC_000068.7	26501663	26501795	-0.402004	Name=Notch1
NC_000068.7	146512212	146512266	-0.400476	Name=Ralgapa2
NC_000068.7	93180144	93180314	-0.400358	Name=Gm32683
NC_000068.7	178413878	178414309	-0.400096	Name=Ppp1r3d
NC_000072.6	71847034	71847119	-0.399155	Name=Immt
NC_000073.6	19920584	19920654	-0.398093	Name=Pvr
NC_000070.6	154648961	154649046	-0.396803	Name=Gm13111
NC_000070.6	154648961	154649046	-0.396803	Name=LOC108168988
NC_000082.6	38902194	38902659	-0.395553	Name=Igsf11
NC_000077.6	116389505	116390047	-0.39512	Name=Rnf157
NC_000074.6	84687427	84687690	-0.39503	Name=Trmt1
NC_000074.6	84687427	84687690	-0.39503	Name=Nacc1
NC_000071.6	124804571	124804809	-0.39479	Name=Dnah10
NC_000071.6	24348652	24348886	-0.394714	Name=Kcnh2
NC_000070.6	134163508	134163711	-0.39454	Name=LOC108169013
NC_000070.6	134163508	134163711	-0.39454	Name=Cep85
NC_000081.6	7934149	7934324	-0.394424	Name=Wdr70
NC_000081.6	72810192	72810276	-0.394107	Name=Peg13
NC_000081.6	72810192	72810276	-0.394107	Name=Trappc9
NC_000072.6	30738075	30738488	-0.393827	Name=Mest
NT_166299.2	852352	852719	-0.393665	Name=2610036A22Rik
NT_166299.2	852352	852719	-0.393665	Name=LOC100862460
NT_166299.2	852352	852719	-0.393665	Name=2610305D13Rik
NC_000077.6	22971841	22972132	-0.393232	Name=Zrsr1
NC_000077.6	22971841	22972132	-0.393232	Name=Commd1
NC_000068.7	13793350	13793759	-0.393185	Name=St8sia6
NC_000074.6	118986478	118986540	-0.39307	Name=Cdh13
NC_000074.6	124897042	124897334	-0.392494	Name=Exoc8
NC_000070.6	43506035	43506327	-0.392261	Name=Arhgef39
NC_000078.6	24651430	24651632	-0.39224	Name=Klf11
NC_000070.6	132261039	132261235	-0.392049	Name=Gm28874
NC_000070.6	132261039	132261235	-0.392049	Name=Gmeb1
NC_000069.6	93521847	93522053	-0.391586	Name=S100a11
NC_000067.6	75506257	75506463	-0.39122	Name=Obsl1
NC_000068.7	174284534	174284750	-0.391175	Name=Nespas
NC_000068.7	174284534	174284750	-0.391175	Name=Gnas
NC_000072.6	46287398	46287526	-0.390825	Name=Cntnap2
NC_000081.6	64313129	64313235	-0.390732	Name=Asap1
NC_000075.6	60713007	60713431	-0.389897	Name=Larp6
NC_000074.6	83973089	83973169	-0.388964	Name=Prkaca
NC_000073.6	46845717	46845941	-0.388623	Name=Ldha
NC_000072.6	134052083	134052187	-0.388316	Name=Etv6
NC_000073.6	91132261	91132331	-0.387808	Name=Dlg2
NC_000074.6	70224958	70225154	-0.387748	Name=Armc6
NC_000081.6	98968892	98969000	-0.387499	Name=LOC105246034
NC_000074.6	108939382	108939611	-0.386999	Name=Zfhx3
NC_000069.6	52029856	52030009	-0.386899	Name=Maml3
NC_000075.6	71679684	71679765	-0.386161	Name=Cgnl1
NC_000084.6	74641706	74641816	-0.386145	Name=Myo5b
NC_000075.6	67616897	67616960	-0.386023	Name=Tln2
NC_000068.7	174295026	174295140	-0.385446	Name=Nespas
NC_000068.7	174295026	174295140	-0.385446	Name=Gnas
NC_000085.6	6979767	6979912	-0.385382	Name=Fkbp2
NC_000084.6	79107925	79107990	-0.385077	Name=Setbp1
NC_000077.6	4947730	4947923	-0.384615	Name=Nefh
NC_000077.6	4947730	4947923	-0.384615	Name=Ap1b1
NC_000073.6	137309289	137309455	-0.38447	Name=Ebf3
NC_000073.6	134224651	134225018	-0.384367	Name=Adam12
NC_000079.6	42052416	42052677	-0.383968	Name=Hivep1
NC_000073.6	70328220	70328329	-0.383923	Name=Gm29683
NC_000077.6	77983180	77983348	-0.383432	Name=Phf12
NC_000080.6	121183270	121183387	-0.383368	Name=Farp1
NC_000068.7	25272524	25272665	-0.383132	Name=Anapc2
NC_000070.6	139767277	139767342	-0.382786	Name=Pax7
NC_000069.6	89527074	89527301	-0.38233	Name=Kcnn3
NC_000071.6	30796211	30796310	-0.382315	Name=Dpysl5
NC_000073.6	70367785	70367931	-0.382123	Name=B130024G19Rik
NC_000073.6	29167809	29168060	-0.382008	Name=Spred3
NC_000078.6	112679256	112679644	-0.381683	Name=Zbtb42
NC_000068.7	169961505	169961743	-0.38144	Name=Tshz2
NC_000074.6	88362167	88362227	-0.38133	Name=Brd7
NC_000077.6	120721344	120721783	-0.381093	Name=Rac3
NC_000072.6	29179442	29179717	-0.380872	Name=Prrt4
NC_000074.6	31111879	31111941	-0.380872	Name=Rnf122
NC_000068.7	18048777	18048863	-0.380778	Name=Skida1
NC_000072.6	148354661	148354841	-0.380033	Name=Tmtc1
NC_000078.6	23534719	23534809	-0.379966	Name=Gm40862
NC_000069.6	123447351	123447701	-0.379306	Name=Gm35065
NC_000069.6	123447351	123447701	-0.379306	Name=Prss12
NC_000076.6	19850024	19850244	-0.379262	Name=Slc35d3
NC_000068.7	172345445	172345691	-0.378724	Name=Fam210b
NC_000082.6	5049421	5049749	-0.378703	Name=Glyr1
NC_000079.6	96132423	96132572	-0.378677	Name=Sv2c
NC_000074.6	33805763	33805858	-0.378527	Name=Rbpms
NC_000076.6	61971779	61971874	-0.378139	Name=Col13a1
NC_000080.6	73143910	73144062	-0.37766	Name=Rcbtb2
NC_000081.6	80700212	80700262	-0.377646	Name=Fam83f
NC_000082.6	18587062	18587237	-0.377622	Name=Tbx1
NC_000082.6	9992222	9992283	-0.377351	Name=Grin2a
NC_000077.6	33203205	33203552	-0.377164	Name=Tlx3
NC_000077.6	82932678	82932827	-0.377147	Name=Unc45bos
NC_000077.6	82932678	82932827	-0.377147	Name=Unc45b
NC_000072.6	85512283	85512533	-0.376995	Name=Egr4
NC_000071.6	115507044	115507135	-0.376889	Name=Pxn
NC_000067.6	36557381	36557453	-0.376818	Name=Sema4c
NC_000077.6	97766181	97766595	-0.376619	Name=Cwc25
NC_000082.6	57549012	57549415	-0.376544	Name=Cmss1
NC_000082.6	57549012	57549415	-0.376544	Name=Filip1l
NC_000073.6	67372680	67373120	-0.37651	Name=Mef2a
NC_000069.6	87906624	87906735	-0.376115	Name=Hdgf
NC_000084.6	57878884	57878996	-0.375995	Name=Slc12a2
NC_000077.6	74610622	74610734	-0.375354	Name=Rap1gap2
NC_000084.6	64661097	64661373	-0.375125	Name=Atp8b1
NC_000079.6	9494710	9495047	-0.373491	Name=Dip2c
NC_000067.6	60098348	60098816	-0.373154	Name=Wdr12
NC_000067.6	60098348	60098816	-0.373154	Name=Carf
NC_000068.7	25878050	25878158	-0.372942	Name=Kcnt1
NC_000079.6	107619321	107619478	-0.372515	Name=Gm32090
NC_000071.6	8622321	8622775	-0.371821	Name=Rundc3b
NC_000071.6	8622321	8622775	-0.371821	Name=Abcb1a
NC_000082.6	38742107	38742525	-0.371785	Name=B4galt4
NC_000077.6	98358431	98358610	-0.371321	Name=Stard3
NC_000068.7	125123293	125123683	-0.370849	Name=Myef2
NC_000077.6	102317847	102317901	-0.370722	Name=Ubtf
NC_000070.6	41498082	41498167	-0.37061	Name=AI464131
NC_000076.6	60219165	60219462	-0.370319	Name=Chst3
NC_000069.6	58576884	58577292	-0.370161	Name=Selt
NC_000068.7	160646171	160646227	-0.370065	Name=Top1
NC_000071.6	30796026	30796083	-0.370019	Name=Dpysl5
NC_000074.6	79399225	79399475	-0.369756	Name=Smad1
NC_000074.6	79399225	79399475	-0.369756	Name=Gm30389
NC_000085.6	37699080	37699202	-0.36968	Name=Cyp26a1
NC_000071.6	106695922	106695993	-0.369141	Name=Zfp644
NC_000073.6	45356184	45356366	-0.369007	Name=Ppfia3
NC_000068.7	18998007	18998172	-0.368311	Name=Pip4k2a
NC_000075.6	55546598	55546718	-0.368131	Name=Isl2
NC_000069.6	129788882	129789037	-0.367836	Name=Lrit3
NC_000075.6	23222943	23223355	-0.366959	Name=Bmper
NC_000075.6	31030614	31030997	-0.366836	Name=Gm29724
NC_000075.6	31030614	31030997	-0.366836	Name=Zbtb44
NC_000068.7	130580778	130580940	-0.366356	Name=Avp
NC_000074.6	87958853	87958908	-0.366142	Name=Zfp423
NC_000070.6	81442515	81442766	-0.366103	Name=Mpdz
NC_000070.6	137744879	137744937	-0.365985	Name=Alpl
NC_000074.6	124793260	124793381	-0.3659	Name=Trim67
NC_000068.7	132577511	132577688	-0.365049	Name=Gpcpd1
NC_000073.6	144582178	144582307	-0.364843	Name=Fadd
NC_000067.6	130715714	130715863	-0.364691	Name=Pfkfb2
NC_000068.7	31887596	31887700	-0.364387	Name=Lamc3
NC_000083.6	32283953	32284034	-0.364208	Name=Brd4
NC_000070.6	57956375	57956477	-0.364171	Name=Txn1
NC_000074.6	104309804	104310063	-0.364006	Name=Cmtm1
NC_000072.6	88724156	88724249	-0.363237	Name=Gm26588
NC_000081.6	79804440	79804642	-0.362956	Name=Nptxr
NC_000081.6	79804440	79804642	-0.362956	Name=Npcd
NC_000075.6	123215377	123215445	-0.362914	Name=Cdcp1
NC_000073.6	35119426	35119675	-0.362831	Name=Cebpa
NC_000072.6	45486172	45486255	-0.36108	Name=Cntnap2
NC_000081.6	97055037	97055107	-0.36053	Name=Slc38a4
NC_000081.6	97055037	97055107	-0.36053	Name=Gm32840
NC_000077.6	3290140	3290472	-0.360076	Name=Patz1
NC_000085.6	46056596	46056888	-0.358952	Name=Pprc1
NC_000073.6	4793307	4793693	-0.358871	Name=Rpl28
NC_000083.6	49900951	49901110	-0.358678	Name=Kif6
NC_000078.6	23969169	23969223	-0.358227	Name=Gm17330
NC_000074.6	106936062	106936357	-0.358172	Name=Sntb2
NC_000076.6	89685876	89686021	-0.357809	Name=Scyl2
NC_000076.6	53597351	53597553	-0.357779	Name=Gm3902
NC_000076.6	53597351	53597553	-0.357779	Name=Mcm9
NC_000076.6	53597351	53597553	-0.357779	Name=Asf1a
NC_000070.6	120746825	120747103	-0.357362	Name=Kcnq4
NC_000077.6	74724256	74724407	-0.356493	Name=Pafah1b1
NC_000070.6	133085010	133085408	-0.356077	Name=Gm26615
NC_000075.6	72532131	72532237	-0.356034	Name=Rfx7
NC_000077.6	5629113	5629173	-0.355718	Name=Ankrd36
NC_000069.6	52269145	52269283	-0.355292	Name=Foxo1
NC_000075.6	120303996	120304265	-0.354989	Name=Myrip
NC_000083.6	49900736	49900802	-0.35497	Name=Kif6
NC_000085.6	43440460	43440640	-0.35462	Name=Cnnm1
NC_000067.6	133046583	133046661	-0.354501	Name=Pik3c2b
NC_000074.6	71525649	71525718	-0.354397	Name=C430049E01Rik
NC_000073.6	65370890	65371031	-0.35432	Name=Tjp1
NC_000071.6	110106896	110106961	-0.353945	Name=Gtpbp6
NC_000082.6	97922154	97922551	-0.353396	Name=C2cd2
NC_000078.6	69893121	69893193	-0.353348	Name=Atl1
NC_000078.6	69893121	69893193	-0.353348	Name=Map4k5
NC_000068.7	30171414	30171581	-0.353299	Name=Endog
NC_000080.6	65098116	65098233	-0.353053	Name=Extl3
NC_000075.6	65631110	65631206	-0.352796	Name=Rbpms2
NC_000071.6	142960848	142961160	-0.352699	Name=Fscn1
NC_000076.6	70599460	70599807	-0.352076	Name=LOC108167819
NC_000085.6	59459251	59459404	-0.351772	Name=Emx2
NC_000071.6	146385235	146385475	-0.351562	Name=Wasf3
NC_000072.6	119847886	119848244	-0.351454	Name=3110021A11Rik
NC_000072.6	119847886	119848244	-0.351454	Name=Erc1
NC_000079.6	29016195	29016417	-0.351421	Name=A330102I10Rik
NC_000071.6	146385536	146385593	-0.351174	Name=Wasf3
NC_000067.6	119420657	119420844	-0.350499	Name=Inhbb
NC_000071.6	121398037	121398097	-0.349414	Name=Naa25
NC_000075.6	65123905	65124210	-0.34933	Name=Igdcc4
NC_000081.6	34306788	34306920	-0.34916	Name=Matn2
NC_000081.6	7810367	7810441	-0.348869	Name=Gdnf
NC_000070.6	63171368	63171423	-0.348465	Name=Kif12
NC_000067.6	86018290	86018344	-0.348463	Name=Spata3
NC_000073.6	35119212	35119367	-0.348222	Name=Cebpa
NC_000074.6	45507754	45507823	-0.348172	Name=Sorbs2
NC_000068.7	35109415	35109787	-0.347987	Name=Cntrl
NC_000071.6	53998895	53998952	-0.347564	Name=Stim2
NC_000071.6	145114488	145114792	-0.347472	Name=Arpc1b
NC_000070.6	48473029	48473226	-0.347437	Name=Tex10
NC_000081.6	82963243	82963379	-0.345476	Name=Tcf20
NC_000082.6	38484116	38484392	-0.345269	Name=Cd80
NC_000076.6	128695932	128696038	-0.345037	Name=Rab5b
NC_000073.6	143460626	143460750	-0.344691	Name=Cdkn1c
NC_000067.6	39577223	39577325	-0.344649	Name=Rnf149
NC_000081.6	91709328	91709398	-0.344378	Name=Lrrk2
NC_000086.7	141725193	141725244	-0.34435	Name=Irs4
NC_000079.6	38346177	38346246	-0.344339	Name=Bmp6
NC_000068.7	84715056	84715158	-0.343781	Name=Gm32289
NC_000068.7	84715056	84715158	-0.343781	Name=Zdhhc5
NC_000075.6	50617194	50617300	-0.343352	Name=AU019823
NC_000073.6	40899217	40899273	-0.343299	Name=Vstm2b
NC_000075.6	55149833	55150119	-0.343085	Name=Ube2q2
NC_000068.7	48814349	48814423	-0.342848	Name=Acvr2a
NC_000075.6	86464543	86464608	-0.342729	Name=Ube2cbp
NC_000075.6	123215245	123215308	-0.342696	Name=Cdcp1
NC_000073.6	67660847	67660905	-0.342272	Name=Ttc23
NC_000079.6	112987796	112987849	-0.341493	Name=Ccno
NC_000070.6	155222573	155222686	-0.341458	Name=Ski
NC_000074.6	83668173	83668379	-0.341213	Name=Ptger1
NC_000074.6	83668173	83668379	-0.341213	Name=Pkn1
NC_000080.6	25607552	25607623	-0.340854	Name=Zmiz1
NC_000071.6	138997422	138997660	-0.340129	Name=Pdgfa
NC_000075.6	123156947	123157108	-0.339867	Name=Clec3b
NC_000075.6	70012466	70012846	-0.339621	Name=Gtf2a2
NC_000077.6	79711880	79712294	-0.3386	Name=Mir193a
NC_000084.6	25754125	25754424	-0.338459	Name=Gm32896
NC_000084.6	25754125	25754424	-0.338459	Name=Celf4
NC_000075.6	50857012	50857373	-0.338456	Name=Ppp2r1b
NC_000078.6	84875602	84875790	-0.338143	Name=Ltbp2
NC_000071.6	110879692	110879851	-0.337979	Name=Ttc28
NC_000079.6	105293931	105294014	-0.337871	Name=Rnf180
NC_000079.6	9094344	9094466	-0.337726	Name=Larp4b
NC_000074.6	33929665	33929783	-0.337699	Name=Rbpms
NC_000072.6	148945807	148945999	-0.337019	Name=Fam60a
NC_000072.6	148945807	148945999	-0.337019	Name=3010003L21Rik
NC_000067.6	170215263	170215422	-0.336673	Name=Uhmk1
NC_000072.6	113469855	113469967	-0.336656	Name=Il17re
NC_000080.6	64652718	64652803	-0.33636	Name=Kif13b
NC_000073.6	79148876	79149030	-0.336342	Name=Mfge8
NC_000077.6	72489905	72490075	-0.335659	Name=Spns2
NC_000068.7	151009276	151009355	-0.334836	Name=Ninl
NC_000071.6	120225481	120225563	-0.33384	Name=Gm31836
NC_000074.6	123653982	123654048	-0.33288	Name=Rhou
NC_000071.6	105731992	105732128	-0.332854	Name=Lrrc8d
NC_000085.6	53600837	53600978	-0.332753	Name=Smc3
NC_000070.6	22487214	22487520	-0.332362	Name=Pou3f2
NC_000073.6	126503032	126503120	-0.331775	Name=Atxn2l
NC_000073.6	126503032	126503120	-0.331775	Name=LOC105243053
NC_000080.6	25459088	25459178	-0.331525	Name=Zmiz1os1
NC_000080.6	25459088	25459178	-0.331525	Name=Zmiz1
NC_000078.6	16810871	16810938	-0.331501	Name=E2f6
NC_000085.6	25236705	25236801	-0.331308	Name=Kank1
NC_000081.6	101224423	101224651	-0.330972	Name=A330009N23Rik
NC_000081.6	101224423	101224651	-0.330972	Name=Grasp
NC_000075.6	70207582	70207732	-0.330498	Name=Gm26849
NC_000075.6	70207582	70207732	-0.330498	Name=Myo1e
NC_000075.6	27030965	27031037	-0.330002	Name=Ncapd3
NC_000075.6	99358456	99358559	-0.328868	Name=Esyt3
NC_000085.6	4625543	4625637	-0.328678	Name=Rce1
NC_000067.6	165460022	165460096	-0.327937	Name=Dcaf6
NC_000070.6	103114745	103114882	-0.325853	Name=Mier1
NC_000070.6	133212348	133212456	-0.325808	Name=Gpr3
NC_000080.6	46883002	46883131	-0.325114	Name=Samd4
NC_000072.6	59208786	59208895	-0.324457	Name=Tigd2
NC_000085.6	9982680	9982769	-0.323571	Name=Fth1
NC_000075.6	42520885	42520973	-0.323354	Name=Grik4
NC_000069.6	152346589	152346717	-0.320578	Name=Usp33
NC_000077.6	98412423	98412485	-0.320299	Name=Erbb2
NC_000083.6	55971565	55971650	-0.318909	Name=Shd
NC_000068.7	165595096	165595280	-0.315765	Name=Eya2
NC_000075.6	70207466	70207521	-0.311695	Name=Gm26849
NC_000075.6	70207466	70207521	-0.311695	Name=Myo1e
NC_000073.6	81571628	81571684	-0.310723	Name=Whamm
NC_000077.6	98412602	98412725	-0.308719	Name=Erbb2
NC_000068.7	167689503	167689585	-0.302846	Name=Cebpb
NC_000076.6	81544972	81545049	0.314488	Name=Gna11
NC_000075.6	75625991	75626102	0.319889	Name=Lysmd2
NC_000068.7	118901853	118901968	0.330502	Name=Bahd1
NC_000081.6	79357569	79357696	0.332266	Name=Maff
NC_000084.6	35772236	35772336	0.332373	Name=Ube2d2a
NC_000072.6	125096252	125096315	0.332945	Name=Gm32616
NC_000072.6	125096252	125096315	0.332945	Name=Chd4
NC_000076.6	78244317	78244496	0.340629	Name=Trappc10
NC_000082.6	95833537	95833646	0.344042	Name=1600002D24Rik
NC_000078.6	117107333	117107397	0.34539	Name=Ptprn2
NC_000069.6	85971079	85971208	0.345617	Name=Sh3d19
NC_000077.6	83853447	83853530	0.346537	Name=Hnf1b
NC_000082.6	11253788	11253930	0.347264	Name=Gspt1
NC_000083.6	6782743	6783051	0.349086	Name=Ezr
NC_000077.6	6006647	6006993	0.350909	Name=Gm40812
NC_000077.6	6006647	6006993	0.350909	Name=Camk2b
NC_000079.6	28952097	28952176	0.352028	Name=Sox4
NC_000079.6	28952097	28952176	0.352028	Name=LOC108168071
NC_000083.6	87125476	87125763	0.35328	Name=Socs5
NC_000078.6	73551164	73551260	0.355035	Name=2210039B01Rik
NC_000083.6	83050974	83051035	0.35614	Name=Gm19689
NC_000077.6	77216192	77216431	0.356802	Name=Ssh2
NC_000077.6	102147411	102147493	0.357826	Name=Nags
NC_000079.6	103921572	103921809	0.357836	Name=D130037M23Rik
NC_000071.6	135868094	135868526	0.35942	Name=Srrm3
NC_000067.6	11177890	11178010	0.359879	Name=Prex2
NC_000076.6	19592004	19592269	0.362389	Name=Ifngr1
NC_000078.6	40037450	40037801	0.362895	Name=Arl4a
NC_000068.7	75831973	75832090	0.363012	Name=Gm34861
NC_000068.7	16250117	16250262	0.363599	Name=Malrd1
NC_000077.6	98970157	98970243	0.363843	Name=Rara
NC_000068.7	34645068	34645211	0.366405	Name=Gm34372
NC_000072.6	148444110	148444427	0.366716	Name=Tmtc1
NC_000078.6	116281923	116282000	0.367579	Name=Esyt2
NC_000068.7	52483624	52483784	0.37132	Name=Cacnb4
NC_000071.6	63657398	63657461	0.373577	Name=Nwd2
NC_000078.6	117107163	117107235	0.373884	Name=Ptprn2
NC_000080.6	90689185	90689311	0.375036	Name=Gm33246
NC_000087.7	90828847	90829305	0.375402	Name=LOC108168644
NC_000078.6	71342341	71342421	0.375599	Name=Gm33016
NC_000077.6	12026153	12026397	0.378495	Name=Grb10
NC_000069.6	37348519	37348825	0.378815	Name=Fgf2os
NC_000069.6	37348519	37348825	0.378815	Name=Fgf2
NC_000083.6	25875529	25875714	0.378819	Name=0610011F06Rik
NC_000086.7	12135328	12135385	0.378963	Name=Bcor
NC_000077.6	108920191	108920426	0.379318	Name=Axin2
NC_000067.6	3637621	3637689	0.379648	Name=Xkr4
NC_000081.6	79357759	79357884	0.381251	Name=Maff
NC_000070.6	135287029	135287139	0.381557	Name=Gm30767
NC_000070.6	126236955	126237145	0.382189	Name=Map7d1
NC_000068.7	158778584	158778759	0.383054	Name=Fam83d
NC_000074.6	117193286	117193426	0.384289	Name=Gan
NC_000071.6	115530644	115530714	0.385686	Name=Pxn
NC_000069.6	90587683	90587798	0.38636	Name=S100a3
NC_000078.6	80168173	80168560	0.387876	Name=Actn1
NC_000074.6	4677689	4677854	0.38849	Name=Gm6410
NC_000071.6	106925771	106926104	0.392114	Name=Hfm1
NC_000076.6	68225119	68225201	0.394131	Name=Arid5b
NC_000072.6	147606790	147606978	0.395176	Name=Ccdc91
NC_000078.6	50649218	50649494	0.395254	Name=Prkd1
NC_000080.6	34569645	34569805	0.395347	Name=Ldb3
NC_000068.7	26091093	26091249	0.396053	Name=Nacc2
NC_000074.6	90861735	90861822	0.396368	Name=Chd9
NC_000068.7	90580167	90580437	0.396519	Name=Ptprj
NC_000077.6	113195015	113195137	0.39735	Name=2610035D17Rik
NC_000077.6	80333106	80333210	0.398175	Name=Rhbdl3
NC_000077.6	79993283	79993412	0.398589	Name=Suz12
NC_000071.6	105424245	105424314	0.399687	Name=Lrrc8b
NC_000068.7	174328455	174328937	0.40126	Name=Gnas
NC_000074.6	119633373	119633486	0.401269	Name=Kcng4
NC_000076.6	121822913	121823004	0.401308	Name=Srgap1
NC_000073.6	4507727	4507812	0.401759	Name=Tnnt1
NC_000068.7	157424301	157424421	0.401937	Name=Src
NC_000083.6	87302122	87302199	0.405295	Name=Ttc7
NC_000086.7	100294712	100294835	0.405365	Name=Eda
NC_000077.6	120120208	120120289	0.408891	Name=Slc38a10
NC_000077.6	82745841	82745907	0.409566	Name=Cct6b
NC_000070.6	106983931	106984016	0.410014	Name=Ssbp3
NC_000071.6	123355846	123356140	0.412747	Name=Bcl7a
NC_000068.7	74706033	74706129	0.412939	Name=Hoxd8
NC_000068.7	74706033	74706129	0.412939	Name=Gm38462
NC_000070.6	117494281	117494814	0.413263	Name=Rnf220
NC_000078.6	29237950	29238097	0.41337	Name=Gm31569
NC_000068.7	116064048	116064314	0.415727	Name=Meis2
NC_000077.6	65140486	65140658	0.416638	Name=Arhgap44
NC_000073.6	16416694	16416813	0.416983	Name=Zc3h4
NC_000069.6	88376846	88377124	0.417315	Name=LOC108168878
NC_000081.6	57695702	57695945	0.418167	Name=Zhx2
NC_000073.6	68312345	68312485	0.418655	Name=Fam169b
NC_000081.6	103097120	103097210	0.41957	Name=Gm28876
NC_000069.6	122936532	122936656	0.420776	Name=Usp53
NC_000075.6	121398353	121398627	0.420819	Name=Trak1
NC_000083.6	87974945	87975218	0.420914	Name=Msh6
NC_000074.6	125756702	125756802	0.422906	Name=Pcnx2
NC_000077.6	12026832	12026933	0.423821	Name=Grb10
NC_000086.7	93295292	93295463	0.425237	Name=Arx
NC_000083.6	66770656	66770717	0.427721	Name=Ptprm
NC_000071.6	74051821	74051989	0.427997	Name=Usp46
NC_000068.7	79635245	79635565	0.428925	Name=Ssfa2
NC_000078.6	85631447	85631730	0.432574	Name=Jdp2
NC_000083.6	66448642	66449227	0.433184	Name=Mtcl1
NC_000070.6	150119173	150119318	0.433409	Name=Slc2a5
NC_000078.6	111429390	111429796	0.433999	Name=Exoc3l4
NC_000083.6	8371868	8372076	0.435393	Name=T2
NC_000075.6	46031183	46031263	0.43601	Name=Sik3
NC_000075.6	78266872	78267006	0.437333	Name=Gm3776
NC_000084.6	60631895	60632073	0.437606	Name=Synpo
NC_000070.6	106682005	106682061	0.446667	Name=Mroh7
NC_000075.6	55968030	55968080	0.450746	Name=4930563M21Rik
NC_000074.6	120036245	120036480	0.451333	Name=Crispld2
NC_000083.6	13737406	13737484	0.453305	Name=Tcte2
NC_000069.6	31038455	31038516	0.453319	Name=Prkci
NC_000071.6	118682243	118682314	0.455351	Name=Med13l
NC_000077.6	106032406	106032488	0.45625	Name=Kcnh6
NC_000067.6	30873455	30873725	0.457059	Name=Phf3
NC_000073.6	113352395	113352468	0.459263	Name=Btbd10
NC_000070.6	129054843	129055200	0.459276	Name=1700086P04Rik
NC_000074.6	26439180	26439422	0.460165	Name=Gm31898
NC_000067.6	153078018	153078180	0.462174	Name=Nmnat2
NC_000081.6	35021347	35021468	0.46366	Name=Stk3
NC_000073.6	127026187	127026633	0.466968	Name=Maz
NC_000072.6	90675849	90675914	0.467306	Name=Iqsec1
NC_000083.6	50622276	50622376	0.467947	Name=Plcl2
NC_000081.6	85993789	85993888	0.469808	Name=Celsr1
NC_000067.6	62807499	62807670	0.4743	Name=Nrp2
NC_000072.6	32196140	32196314	0.477608	Name=Plxna4
NC_000086.7	137946025	137946116	0.479453	Name=Il1rapl2
NC_000074.6	31378388	31378502	0.482025	Name=7420700N18Rik
NC_000067.6	160306462	160306557	0.486371	Name=Rabgap1l
NC_000074.6	14313611	14313727	0.486859	Name=Dlgap2
NC_000083.6	75028946	75029039	0.488059	Name=Ltbp1
NC_000077.6	82433545	82433650	0.488293	Name=Tmem132e
NC_000068.7	58156174	58156261	0.488336	Name=Cytip
NC_000070.6	150049469	150049563	0.489663	Name=Gm13067
NC_000079.6	109116682	109116770	0.490562	Name=Pde4d
NC_000080.6	65268318	65268397	0.494825	Name=Fbxo16
NC_000068.7	152081231	152081296	0.495722	Name=AA387200
NC_000073.6	143119908	143120067	0.496036	Name=Kcnq1
NC_000084.6	89380778	89381003	0.496701	Name=Dok6
NC_000084.6	60703228	60703420	0.496925	Name=Ndst1
NC_000069.6	124579078	124579251	0.497638	Name=1700003H04Rik
NC_000086.7	6069646	6069699	0.503195	Name=Gm26618
NC_000073.6	97146951	97147073	0.504282	Name=Gab2
NC_000073.6	44074412	44074480	0.508146	Name=Klk1b21
NC_000070.6	129151691	129151814	0.510186	Name=S100pbp
NC_000086.7	157874805	157874950	0.512742	Name=Cnksr2
NC_000070.6	110347086	110347218	0.513749	Name=Elavl4
NC_000067.6	116282952	116283106	0.515331	Name=Cntnap5a
NC_000079.6	95103388	95103468	0.517966	Name=Pde8b
NC_000078.6	3809405	3809546	0.520392	Name=Dnmt3a
NC_000086.7	43428409	43428583	0.528794	Name=Tenm1
NC_000067.6	74100196	74100276	0.528842	Name=Tns1
NC_000070.6	73621766	73621820	0.530434	Name=Gm11237
NC_000086.7	25301030	25301129	0.537988	Name=Gm5169
NC_000086.7	25301030	25301129	0.537988	Name=4930557B15Rik
NC_000082.6	4756125	4756214	0.53834	Name=Hmox2
NC_000068.7	58737492	58737565	0.539573	Name=Upp2
NC_000085.6	53754347	53754513	0.542744	Name=Gm30943
NC_000085.6	53754347	53754513	0.542744	Name=Rbm20
NC_000086.7	42072115	42072249	0.543801	Name=Xiap
NC_000082.6	27323589	27323723	0.550684	Name=Gm32312
NC_000082.6	27323589	27323723	0.550684	Name=Ostn
NC_000086.7	126821961	126822080	0.551573	Name=4932411N23Rik
NC_000086.7	168970023	168970113	0.555719	Name=Arhgap6
NT_166322.1	3940	4036	0.557801	Name=4930427A07Rik
NC_000071.6	22885146	22885302	0.557943	Name=Lhfpl3
NC_000086.7	59297472	59297566	0.559373	Name=Fgf13
NC_000086.7	142773814	142773891	0.560551	Name=Tmem164
NC_000082.6	72057138	72057266	0.560635	Name=Robo1
NC_000070.6	129059284	129059365	0.563882	Name=Rnf19b
NC_000084.6	42248282	42248347	0.567656	Name=Lars
NC_000070.6	148820330	148820396	0.568058	Name=Casz1
NC_000080.6	18817555	18817606	0.569835	Name=Ube2e2
NC_000083.6	70219780	70219844	0.570735	Name=Dlgap1
NC_000077.6	103023473	103023616	0.576857	Name=Dcakd
NC_000068.7	153529968	153530451	0.577747	Name=Nol4l
NC_000078.6	15870587	15870690	0.580881	Name=Gm5432
NC_000085.6	11800134	11800298	0.585282	Name=Stx3
NC_000076.6	8319150	8319253	0.597923	Name=Ust
NC_000086.7	42093017	42093081	0.601148	Name=Xiap
NC_000086.7	166416501	166416608	0.603675	Name=Ofd1
NT_166434.1	225268	225359	0.606721	Name=LOC100041599
NC_000081.6	4733963	4734029	0.609431	Name=C6
NC_000086.7	138673767	138673862	0.627588	Name=Il1rapl2
NC_000084.6	74631663	74631758	0.638543	Name=Myo5b
NC_000080.6	4813993	4814084	0.639328	Name=Gm26650
NC_000087.7	84563103	84563200	0.665856	Name=LOC108168579
NC_000086.7	111974620	111974687	0.68697	Name=Tex16
NC_000086.7	107289822	107290272	0.706614	Name=Gpr174
NC_000074.6	87939057	87939226	0.710352	Name=Zfp423

## Sheet: 4. DMR d5 vs Healhty TSS
Differentially methylated regions (DMRs) at TSS between undamaged and day5 DDC-damaged livers from littermate controls. Genes with DMRs ≥25% are shown. Column D, Methylation/Hydroxymethylation difference, positive value means loss of 5mC or 5hmC
Chromosome	Start	End	Difference	Gene Name
NC_000068.7	90580059	90580557	0.530475	LOC108168775
NC_000068.7	90580059	90580557	0.530475	Ptprj
NC_000076.6	78244136	78244741	0.420611	Trappc10
NC_000076.6	78244136	78244741	0.420611	Gm40708
NC_000071.6	88564831	88565166	0.436132	Rufy3
NC_000071.6	88564831	88565166	0.436132	Gm42107
NC_000075.6	75625779	75626228	0.361062	Lysmd2
NC_000071.6	21055753	21056184	0.557614	Gm42221
NC_000071.6	21055753	21056184	0.557614	Ptpn12
NC_000070.6	119492380	119492854	0.37187	Rimkla
NC_000086.7	13071941	13072412	0.417686	Usp9x
NC_000077.6	79591159	79591553	0.374631	Rab11fip4
NC_000072.6	148444141	148444490	0.381214	Tmtc1
NC_000068.7	79635122	79635566	0.434501	Ssfa2
NC_000068.7	79635122	79635566	0.434501	LOC108168774
NC_000068.7	153529969	153530576	0.549756	Nol4l
NC_000083.6	87974913	87975293	0.451805	Msh6
NC_000074.6	126593410	126593650	0.340436	Irf2bp2
NC_000067.6	30873447	30873726	0.459847	Phf3
NC_000068.7	76675000	76675399	0.41045	Fkbp7
NC_000068.7	76675000	76675399	0.41045	Plekha3
NC_000068.7	76675000	76675399	0.41045	Gm39860
NC_000069.6	145938259	145938641	0.383961	2410004B18Rik
NC_000075.6	78395889	78396152	0.312079	Ddx43
NC_000082.6	11253809	11254085	0.392209	Gspt1
NC_000082.6	11253809	11254085	0.392209	Mir1945
NC_000083.6	66448642	66449237	0.414666	Mtcl1
NC_000068.7	156362390	156363250	0.430671	Gm39972
NC_000075.6	72925504	72925763	0.344084	Pygo1
NC_000071.6	150673535	150673861	-0.507715	Pds5b
NC_000083.6	25434030	25434523	-0.438564	Gm33565
NC_000083.6	25434030	25434523	-0.438564	Cacna1h
NC_000069.6	37348513	37348957	0.418887	Fgf2
NC_000081.6	52040344	52040672	0.376188	Aard
NC_000068.7	24367416	24367788	0.370528	Psd4
NC_000073.6	127026205	127026633	0.470861	Maz
NC_000080.6	29721557	29722027	0.38703	Cacna2d3
NC_000078.6	50649218	50649553	0.42578	Prkd1
NC_000070.6	134704052	134704361	-0.361967	Man1c1
NC_000071.6	113772723	113772923	0.316238	Iscu
NC_000071.6	113772723	113772923	0.316238	Sart3
NC_000077.6	77216197	77216514	0.399543	Ssh2
NC_000077.6	77216197	77216514	0.399543	Efcab5
NC_000071.6	65435742	65436106	0.467136	Ugdh
NC_000075.6	111312072	111312606	-0.443474	Trank1
NC_000079.6	103921536	103921843	0.380105	Erbb2ip
NC_000072.6	30048440	30048671	0.328411	Nrf1
NC_000072.6	30048440	30048671	0.328411	1700080G18Rik
NC_000077.6	100759601	100759876	-0.390367	Kcnh4
NC_000072.6	56832082	56832405	0.382879	Fkbp9
NC_000068.7	174328690	174329030	0.351271	Gm30189
NC_000077.6	6006527	6006857	0.333452	Gm40812
NC_000074.6	70594711	70594980	0.324479	Isyna1
NC_000073.6	4658555	4658753	0.323444	Ppp6r1
NC_000074.6	105758339	105758564	-0.343767	Gfod2
NC_000075.6	106368388	106368600	0.329131	Dusp7
NC_000081.6	102470947	102471380	-0.378898	Pcbp2
NC_000081.6	102470947	102471380	-0.378898	Gm36331
NC_000067.6	119648479	119648700	-0.371266	Epb41l5
NC_000071.6	106925770	106926083	0.423691	Hfm1
NC_000081.6	57695654	57695946	0.468269	Zhx2
NC_000082.6	97962086	97962341	0.346885	Zbtb21
NC_000081.6	12205140	12205375	0.351666	Mtmr12
NC_000083.6	53566907	53567201	-0.359323	Kat2b
NC_000076.6	79988473	79988689	0.333712	Cnn2
NC_000070.6	97778006	97778229	-0.354405	Gm38709
NC_000073.6	16614881	16615135	0.339499	Arhgap35
NC_000069.6	33143248	33143456	0.356153	Pex5l
NC_000068.7	118901852	118902021	0.345427	Gm32957
NC_000083.6	25875494	25875739	0.380785	n-TGccc7
NC_000083.6	25875494	25875739	0.380785	0610011F06Rik
NC_000079.6	98316345	98316620	-0.369859	LOC105246056
NC_000079.6	98316345	98316620	-0.369859	Btf3
NC_000076.6	19591996	19592269	0.388547	Ifngr1
NC_000070.6	81442482	81442654	-0.342978	Mpdz
NC_000078.6	51691209	51691435	0.345992	Ap4s1
NC_000078.6	51691209	51691435	0.345992	Strn3
NC_000081.6	85581650	85581830	-0.316656	AU022754
NC_000081.6	85581650	85581830	-0.316656	Wnt7b
NC_000072.6	4747533	4747811	0.343772	Peg10
NC_000072.6	4747533	4747811	0.343772	Sgce
NC_000070.6	134160648	134161119	0.44358	LOC108169013
NC_000068.7	112265741	112265888	0.310629	Slc12a6
NC_000083.6	56511624	56511835	0.373395	Znrf4
NC_000076.6	85184898	85185014	0.343135	Cry1
NC_000085.6	21653305	21653523	0.35341	Abhd17b
NC_000085.6	21653305	21653523	0.35341	1110059E24Rik
NC_000086.7	133898237	133898534	0.356518	Tspan6
NC_000083.6	56757536	56757686	0.345218	Nrtn
NC_000069.6	83128710	83128894	-0.323079	Gm10710
NC_000079.6	58071173	58071593	0.370173	Gm33389
NC_000072.6	29917149	29917309	0.334737	Strip2
NC_000077.6	75795671	75795778	-0.328423	Gm12339
NC_000077.6	75795671	75795778	-0.328423	Doc2b
NC_000080.6	122912933	122913034	0.337795	Gm15735
NC_000080.6	122912933	122913034	0.337795	LOC108168204
NC_000080.6	122912933	122913034	0.337795	Ggact
NC_000067.6	177257937	177258644	-0.532244	Gm36904
NC_000067.6	177257937	177258644	-0.532244	Akt3
NC_000067.6	175692322	175692466	0.330256	Gm39707
NC_000067.6	175692322	175692466	0.330256	Opn3
NC_000080.6	16365600	16365699	0.33632	Top2b
NC_000081.6	58888878	58888948	0.335243	Rnf139
NC_000069.6	55055399	55055555	0.321814	4931419H13Rik
NC_000069.6	55055399	55055555	0.321814	Ccna1
NC_000086.7	43428279	43428583	0.468479	Tenm1
NC_000086.7	12081635	12081863	-0.358351	LOC108168482
NC_000067.6	181211895	181212080	-0.4258	Gm38664
NC_000067.6	181211895	181212080	-0.4258	Wdr26
NC_000078.6	8772750	8772861	0.344936	Gm4755
NC_000083.6	6782971	6783051	0.349455	Ezr
NC_000079.6	92426620	92426696	0.318774	Ankrd34b
NC_000074.6	4677689	4677833	0.389763	Gm6410
NC_000078.6	11455942	11456092	-0.342378	Rad51ap2
NC_000072.6	125096215	125096316	0.351543	Chd4
NC_000072.6	125096215	125096316	0.351543	Mir7045
NC_000068.7	139678411	139678504	0.334263	Ism1
NC_000081.6	89524102	89524203	-0.332109	LOC105246018
NC_000077.6	75172410	75172582	0.349873	Mir212
NC_000077.6	75172410	75172582	0.349873	Mir132
NC_000072.6	4902980	4903210	0.367036	Ppp1r9a
NC_000086.7	73635464	73635698	0.442888	LOC108168457
NC_000085.6	25611154	25611213	0.33933	Dmrt3
NC_000070.6	150147615	150147756	-0.438536	Slc2a7
NC_000075.6	72925334	72925426	0.337177	Pygo1
NC_000082.6	55974096	55974184	0.318319	Zbtb11
NC_000082.6	55974096	55974184	0.318319	Zbtb11os1
NC_000069.6	85971078	85971197	0.336128	Sh3d19
NC_000071.6	113772977	113773049	0.316442	Iscu
NC_000071.6	113772977	113773049	0.316442	Sart3
NC_000078.6	76370045	76370208	0.43358	Zbtb1
NC_000078.6	76370045	76370208	0.43358	Zbtb25
NC_000075.6	56995751	56995931	-0.374948	Ptpn9
NC_000068.7	120731014	120731166	0.354819	Cdan1
NC_000068.7	162660483	162660623	-0.399409	9430021M05Rik
NC_000068.7	162660483	162660623	-0.399409	Ptprt
NC_000067.6	13374243	13374350	0.399839	Ncoa2
NC_000075.6	21547108	21547180	0.352273	Carm1
NC_000069.6	59006421	59006513	0.35126	Med12l
NC_000077.6	75795250	75795469	-0.37116	Gm12339
NC_000077.6	75795250	75795469	-0.37116	Doc2b
NC_000074.6	126593284	126593339	0.313908	Irf2bp2
NC_000071.6	129020578	129020687	0.322637	Ran
NC_000070.6	117494394	117494509	0.337104	LOC102637578
NC_000073.6	97737937	97738063	-0.352095	Aqp11
NC_000077.6	66168069	66168210	-0.363294	LOC102633054
NC_000084.6	88894303	88894429	-0.441346	Socs6
NC_000070.6	46536052	46536162	0.326027	Trim14
NC_000074.6	122432726	122432855	0.313384	Cyba
NC_000068.7	75831973	75832097	0.36152	Agps
NC_000068.7	75831973	75832097	0.36152	Gm34861
NC_000068.7	130906533	130906587	0.348153	Atrn
NC_000068.7	130906533	130906587	0.348153	A730017L22Rik
NC_000081.6	78899427	78899567	-0.443193	Sh3bp1
NC_000069.6	17786637	17786698	0.314805	Gm30340
NC_000073.6	134938306	134938406	0.409886	Fam196a
NC_000077.6	77982984	77983059	-0.372204	Phf12
NC_000069.6	89322643	89322699	0.336332	Efna3
NC_000067.6	85793264	85793364	0.4745	Cab39
NC_000074.6	64850031	64850086	0.342374	Klhl2
NC_000078.6	73448986	73449269	0.392145	Gm34080
NC_000075.6	74860568	74860634	0.46576	Onecut1
NC_000076.6	81544957	81545041	0.327303	Gna11
NC_000080.6	52014337	52014452	-0.415128	Tmem253
NC_000086.7	150813635	150813829	-0.395305	Maged2
NC_000086.7	7375623	7375778	-0.451839	Gm14379
NC_000086.7	7375623	7375778	-0.451839	Usp27x
NC_000086.7	74085523	74085595	0.369572	Mecp2
NC_000080.6	56886619	56886831	-0.411187	Zmym2
NC_000086.7	94541085	94541191	-0.444835	Maged1
NC_000076.6	89873414	89873466	-0.324089	Anks1b
NC_000073.6	60004318	60004439	0.378638	Snurf
NC_000075.6	106249656	106249894	0.409882	Alas1
NC_000078.6	108275332	108275384	-0.399592	Ccdc85c
NC_000083.6	78984331	78984471	-0.351598	Gm41622
NC_000079.6	21812890	21812953	0.478445	LOC108168067
NC_000073.6	65527932	65528016	0.357845	Tjp1
NC_000067.6	74951665	74951755	0.339506	Ihh
NC_000067.6	152090258	152090356	-0.46657	1700025G04Rik
NC_000073.6	141193713	141193779	0.348161	Lrrc56
NC_000073.6	141193713	141193779	0.348161	Hras
NC_000077.6	79993356	79993412	0.436269	Suz12
NC_000078.6	18853351	18853409	0.372771	Gm40847
NC_000068.7	151632459	151632563	-0.344605	Snph
NC_000083.6	35701478	35701708	0.434813	LOC105246271
NC_000078.6	72761740	72761790	0.331561	Ppm1a
NC_000073.6	5053579	5053685	0.376924	Ccdc106
NC_000073.6	6728858	6729013	-0.441219	Usp29
NC_000070.6	129059189	129059365	0.513062	1700086P04Rik
NC_000086.7	73096824	73097047	0.658336	Xlr3a
NC_000071.6	115558209	115558334	0.370626	Rplp0
NC_000070.6	43507265	43507494	0.40108	Car9
NC_000085.6	6084104	6084357	0.419086	Cdca5
NC_000085.6	6084104	6084357	0.419086	Zfpl1
NC_000076.6	77211296	77211445	0.368319	Gm40704
NC_000070.6	150119173	150119229	0.39167	Slc2a5
NC_000076.6	62726153	62726208	0.368285	Stox1
NC_000070.6	52989097	52989175	0.369209	Nipsnap3a
NC_000070.6	44658720	44658912	0.424958	LOC102632357
NC_000070.6	133011694	133011788	0.363366	Ahdc1
NC_000069.6	40453609	40453758	0.576271	Gm30184
NC_000072.6	108783516	108783573	-0.299801	Arl8b
NC_000070.6	129961242	129961313	0.346394	1700003M07Rik
NC_000073.6	4780117	4780192	0.505869	Tmem190
NC_000077.6	57011182	57011288	-0.493342	Gria1
NC_000077.6	115047383	115047494	0.410296	Cd300ld3
NC_000080.6	20793567	20793619	0.493205	Gm30108
NC_000080.6	20793567	20793619	0.493205	Camk2g
NC_000068.7	118110398	118110478	0.379931	Thbs1
NC_000068.7	118110398	118110478	0.379931	Gm13986
NC_000073.6	45615599	45615714	-0.439702	Fut1
NC_000077.6	87877344	87877481	-0.600406	Epx
NC_000083.6	8122928	8123011	0.666578	Gm41523
NC_000080.6	20694729	20694869	0.363694	Fut11
NC_000077.6	70812056	70812133	0.457456	Scimp
NC_000083.6	24657918	24657968	0.363928	Npw
NC_000068.7	174284343	174284400	-0.367197	Gnas
NC_000075.6	57236020	57236082	0.412238	Trcg1
NC_000076.6	60125705	60125786	0.366858	Mir6906
NC_000080.6	51345624	51345865	-0.466075	4930597G03Rik
NC_000086.7	77510821	77510875	-0.34944	Tbl1x
NC_000073.6	8862467	8862558	-0.619517	Gm20482
NC_000086.7	155218399	155218477	0.616458	Sat1
NC_000071.6	35056598	35056660	0.463225	Dok7
NC_000086.7	48518378	48518429	0.455353	Rab33a
NC_000067.6	93967259	93967360	-0.664819	Gm7889
NC_000076.6	71662691	71662795	0.521506	Gm34544
NC_000080.6	76034063	76034297	0.528248	Gm36477
NC_000086.7	7377222	7377272	-0.525116	Usp27x
NC_000072.6	48184671	48184736	0.594978	n-TCgca8
NC_000080.6	42119082	42119156	-0.554057	LOC102638116
NC_000077.6	120181622	120181740	-0.469765	Gm9734
NC_000086.7	151018553	151018641	-0.517674	Gnl3l

## Sheet: 5. DMR d5 vs Healthy Gene Body
Differentially methylated regions (DMRs) at gene body between undamaged and day5 DDC-damaged livers from littermate controls. Genes with DMRs ≥25% are shown. Column D, Methylation/Hydroxymethylation difference, positive value means loss of 5mC or 5hmC
Chromosome	Start	End	Difference	Gene Name
NC_000071.6	89207256	89207343	-0.754678	Name=Slc4a4
NC_000078.6	23567164	23567256	-0.679017	Name=Gm40862
NC_000072.6	145544491	145544790	-0.653235	Name=Gm38475
NC_000077.6	87783394	87783452	-0.622015	Name=Bzrap1
NC_000077.6	87783394	87783452	-0.622015	Name=Gm34064
NC_000073.6	8862467	8862558	-0.619517	Name=Gm20482
NC_000086.7	55442069	55442854	-0.61879	Name=Gm14625
NC_000069.6	98305328	98305650	-0.617056	Name=Hmgcs2
NC_000072.6	37199201	37199421	-0.617048	Name=Dgki
NC_000073.6	18945600	18946075	-0.613661	Name=Nova2
NC_000069.6	108301074	108301154	-0.607799	Name=Sort1
NC_000078.6	116898820	116898895	-0.602618	Name=Ptprn2
NC_000077.6	88726698	88726783	-0.596056	Name=C030037D09Rik
NC_000076.6	61664904	61664998	-0.584224	Name=Ppa1
NC_000086.7	55943868	55943945	-0.57842	Name=3830403N18Rik
NC_000070.6	148925576	148925898	-0.576237	Name=Casz1
NC_000086.7	83766913	83767020	-0.572253	Name=Dmd
NC_000073.6	56518003	56518092	-0.571515	Name=Oca2
NC_000080.6	42257845	42258283	-0.570507	Name=Gm17026
NC_000067.6	178809540	178809689	-0.561553	Name=Kif26b
NC_000086.7	130203685	130203851	-0.55384	Name=Diaph2
NC_000086.7	138521100	138521164	-0.5529	Name=Il1rapl2
NC_000086.7	13576804	13576876	-0.549513	Name=Gm34836
NC_000086.7	13576804	13576876	-0.549513	Name=Cask
NC_000067.6	115737359	115737471	-0.549411	Name=Cntnap5a
NC_000085.6	31940142	31940220	-0.547407	Name=A1cf
NC_000078.6	73122857	73122921	-0.547129	Name=Mnat1
NC_000086.7	120285379	120285509	-0.54391	Name=Gm30577
NC_000080.6	63714771	63714897	-0.539384	Name=Xkr6
NC_000069.6	62739755	62739916	-0.537307	Name=Gm34048
NC_000087.7	35909490	35909621	-0.537167	Name=LOC108168555
NC_000074.6	24656392	24656474	-0.53607	Name=Adam18
NC_000067.6	177257937	177258644	-0.532244	Name=Gm36904
NC_000067.6	177257937	177258644	-0.532244	Name=Akt3
NC_000086.7	155853921	155854208	-0.530733	Name=LOC102639025
NC_000078.6	9936078	9936177	-0.52884	Name=Gm33734
NC_000086.7	7377222	7377272	-0.525116	Name=Gm14379
NC_000070.6	66057112	66057637	-0.523167	Name=Astn2
NC_000075.6	38466889	38466994	-0.518067	Name=Olfr904
NC_000077.6	55304536	55304643	-0.518061	Name=Fat2
NC_000070.6	17975908	17975962	-0.516661	Name=Mmp16
NC_000071.6	150673535	150673861	-0.507715	Name=Gm40353
NC_000071.6	150673535	150673861	-0.507715	Name=Pds5b
NC_000073.6	16601962	16602019	-0.502461	Name=Arhgap35
NC_000072.6	34906977	34907063	-0.500612	Name=Wdr91
NC_000067.6	91828234	91828346	-0.500011	Name=Twist2
NC_000067.6	91828234	91828346	-0.500011	Name=LOC108167658
NC_000082.6	16730359	16730489	-0.499658	Name=Gm34340
NC_000082.6	16730359	16730489	-0.499658	Name=LOC108168310
NC_000070.6	114212604	114212716	-0.49731	Name=Skint11
NC_000073.6	71172057	71172140	-0.497202	Name=Gm36071
NC_000083.6	85707699	85707877	-0.4954	Name=CJ186046Rik
NC_000067.6	172492129	172492339	-0.491262	Name=Igsf9
NC_000073.6	94684430	94684490	-0.487149	Name=Gm32647
NC_000074.6	126109888	126109971	-0.485456	Name=LOC108167586
NC_000079.6	15503401	15503501	-0.483869	Name=Gli3
NC_000079.6	77784374	77784478	-0.482938	Name=Fam172a
NC_000067.6	115673454	115673668	-0.475533	Name=LOC108167704
NC_000071.6	64963203	64963360	-0.475294	Name=Tlr6
NC_000086.7	83220507	83220722	-0.474326	Name=Dmd
NC_000077.6	96329569	96329751	-0.473355	Name=Hoxb3
NC_000075.6	88616990	88617056	-0.472402	Name=Gm29881
NC_000075.6	88616990	88617056	-0.472402	Name=LOC108167672
NC_000071.6	69532299	69532356	-0.470581	Name=Yipf7
NC_000072.6	45486156	45486349	-0.469862	Name=Cntnap2
NC_000075.6	114775518	114775674	-0.467425	Name=Cmtm7
NC_000072.6	30238250	30238311	-0.466642	Name=Ube2h
NC_000067.6	152090258	152090356	-0.46657	Name=1700025G04Rik
NC_000082.6	95211933	95212149	-0.464142	Name=Gm31641
NC_000070.6	103699154	103699376	-0.459275	Name=Dab1
NC_000081.6	66156709	66156766	-0.457048	Name=Kcnq3
NC_000073.6	70287343	70287433	-0.454664	Name=Gm29683
NC_000068.7	97476734	97476900	-0.454612	Name=Lrrc4c
NC_000086.7	7375623	7375778	-0.451839	Name=Usp27x
NC_000067.6	53616106	53616176	-0.45167	Name=Dnah7a
NC_000079.6	63203559	63203748	-0.448683	Name=2010111I01Rik
NC_000071.6	8711366	8711555	-0.44848	Name=Abcb1a
NC_000086.7	94541085	94541191	-0.444835	Name=Maged1
NC_000075.6	111312072	111312606	-0.443474	Name=Trank1
NC_000084.6	88894303	88894429	-0.441346	Name=Socs6
NC_000073.6	6728858	6729013	-0.441219	Name=Peg3
NC_000082.6	74448260	74448368	-0.440441	Name=Robo2
NC_000086.7	101383007	101383220	-0.440273	Name=Gjb1
NC_000073.6	18960992	18961117	-0.440225	Name=Nova2
NC_000073.6	45615599	45615714	-0.439702	Name=Fgf21
NC_000083.6	25434030	25434523	-0.438564	Name=Gm33565
NC_000075.6	44704104	44704181	-0.432571	Name=Phldb1
NC_000072.6	128653373	128653553	-0.43046	Name=Gm34617
NC_000077.6	19014924	19015109	-0.428983	Name=Meis1
NC_000077.6	19014924	19015109	-0.428983	Name=LOC101055656
NC_000067.6	181211895	181212080	-0.4258	Name=Wdr26
NC_000067.6	181211895	181212080	-0.4258	Name=Gm38664
NC_000077.6	81610680	81610792	-0.42008	Name=Asic2
NC_000070.6	148890980	148891123	-0.419829	Name=Casz1
NC_000075.6	121118415	121118516	-0.419112	Name=Ulk4
NC_000077.6	77687474	77687666	-0.416558	Name=Nufip2
NC_000080.6	52014337	52014452	-0.415128	Name=Zfp219
NC_000084.6	78438503	78438723	-0.412447	Name=Slc14a2
NC_000071.6	96489615	96489697	-0.412175	Name=Fras1
NC_000086.7	24483623	24483776	-0.411439	Name=Gm5934
NC_000080.6	56886619	56886831	-0.411187	Name=Zmym2
NC_000085.6	38162629	38162812	-0.410922	Name=Pde6c
NC_000086.7	166348687	166348790	-0.409167	Name=Gpm6b
NC_000070.6	139556016	139556421	-0.408048	Name=Iffo2
NC_000070.6	125895097	125895160	-0.406959	Name=2610028E06Rik
NC_000071.6	125753941	125753992	-0.404095	Name=Tmem132b
NC_000081.6	100168346	100168424	-0.4026	Name=Dip2b
NC_000072.6	148392042	148392147	-0.401968	Name=Tmtc1
NC_000078.6	108275332	108275384	-0.399592	Name=Ccdc85c
NC_000068.7	162660483	162660623	-0.399409	Name=Ptprt
NC_000080.6	33149482	33149541	-0.398214	Name=Wdfy4
NC_000070.6	148807488	148807566	-0.398094	Name=Casz1
NC_000086.7	150813635	150813829	-0.395305	Name=Maged2
NC_000070.6	141202080	141202185	-0.393912	Name=Fbxo42
NC_000077.6	100759601	100759876	-0.390367	Name=Kcnh4
NC_000073.6	27325581	27325637	-0.38641	Name=Ltbp4
NC_000085.6	57828541	57828811	-0.384875	Name=Atrnl1
NC_000084.6	35850926	35851020	-0.38401	Name=Cxxc5
NC_000073.6	80657881	80657948	-0.382465	Name=Crtc3
NC_000082.6	4859115	4859403	-0.381568	Name=4930562C15Rik
NC_000071.6	24482496	24482796	-0.37952	Name=Agap3
NC_000084.6	20737802	20737852	-0.379424	Name=B4galt6
NC_000081.6	102470947	102471380	-0.378898	Name=Pcbp2
NC_000068.7	25051601	25051721	-0.377229	Name=Pnpla7
NC_000072.6	119674936	119675061	-0.37707	Name=Erc1
NC_000075.6	56995751	56995931	-0.374948	Name=Ptpn9
NC_000077.6	77982984	77983059	-0.372204	Name=Phf12
NC_000067.6	119648479	119648700	-0.371266	Name=Epb41l5
NC_000077.6	75795250	75795469	-0.37116	Name=Doc2b
NC_000069.6	144166152	144166269	-0.370011	Name=Gm34162
NC_000079.6	98316345	98316620	-0.369859	Name=Btf3
NC_000077.6	79791619	79791690	-0.367687	Name=LOC105242790
NC_000068.7	174284343	174284400	-0.367197	Name=Nespas
NC_000068.7	174284343	174284400	-0.367197	Name=Gnas
NC_000079.6	63249495	63249599	-0.36553	Name=2010111I01Rik
NC_000077.6	66168069	66168210	-0.363294	Name=Dnah9
NC_000070.6	134704052	134704361	-0.361967	Name=Man1c1
NC_000074.6	119046389	119046446	-0.361455	Name=Cdh13
NC_000071.6	124804689	124804809	-0.359837	Name=Dnah10
NC_000083.6	53566907	53567201	-0.359323	Name=Kat2b
NC_000086.7	12081635	12081863	-0.358351	Name=LOC108168482
NC_000086.7	12081635	12081863	-0.358351	Name=Bcor
NC_000070.6	97778006	97778229	-0.354405	Name=Nfia
NC_000075.6	109766195	109766245	-0.352222	Name=Fbxw27
NC_000073.6	97737937	97738063	-0.352095	Name=Aqp11
NC_000083.6	78984331	78984471	-0.351598	Name=Prkd3
NC_000086.7	77510821	77510875	-0.34944	Name=Tbl1x
NC_000068.7	151632459	151632563	-0.344605	Name=Snph
NC_000074.6	105758339	105758564	-0.343767	Name=Gfod2
NC_000070.6	81442482	81442654	-0.342978	Name=Mpdz
NC_000078.6	11455942	11456092	-0.342378	Name=Rad51ap2
NC_000077.6	115816431	115816527	-0.341594	Name=Tsen54
NC_000081.6	89524102	89524203	-0.332109	Name=Shank3
NC_000077.6	75795671	75795778	-0.328423	Name=Doc2b
NC_000074.6	124834342	124834397	-0.326856	Name=Trim67
NC_000076.6	89873414	89873466	-0.324089	Name=Anks1b
NC_000069.6	83128710	83128894	-0.323079	Name=Gm10710
NC_000073.6	99468869	99468957	-0.319244	Name=Klhl35
NC_000081.6	85581650	85581830	-0.316656	Name=Wnt7b
NC_000081.6	85581650	85581830	-0.316656	Name=AU022754
NC_000072.6	108783516	108783573	-0.299801	Name=Arl8b
NC_000077.6	106032343	106032954	0.274712	Name=Kcnh6
NC_000075.6	78395889	78396152	0.312079	Name=Ddx43
NC_000074.6	122432726	122432855	0.313384	Name=Cyba
NC_000074.6	126593284	126593339	0.313908	Name=Irf2bp2
NC_000071.6	113772723	113772923	0.316238	Name=Iscu
NC_000071.6	113772977	113773049	0.316442	Name=Iscu
NC_000082.6	55974096	55974184	0.318319	Name=Zbtb11os1
NC_000082.6	55974096	55974184	0.318319	Name=Zbtb11
NC_000079.6	92426620	92426696	0.318774	Name=Ankrd34b
NC_000069.6	55055399	55055555	0.321814	Name=4931419H13Rik
NC_000071.6	129020578	129020687	0.322637	Name=Ran
NC_000080.6	25607750	25607936	0.323053	Name=Zmiz1
NC_000073.6	4658555	4658753	0.323444	Name=Ppp6r1
NC_000074.6	70594711	70594980	0.324479	Name=Isyna1
NC_000070.6	46536052	46536162	0.326027	Name=LOC108168940
NC_000070.6	46536052	46536162	0.326027	Name=Trim14
NC_000069.6	89960426	89960533	0.326472	Name=Atp8b2
NC_000076.6	63100103	63100269	0.326564	Name=Atoh7
NC_000074.6	71375885	71375951	0.327296	Name=Nr2f6
NC_000076.6	81544957	81545041	0.327303	Name=Gna11
NC_000072.6	30048440	30048671	0.328411	Name=1700080G18Rik
NC_000072.6	30048440	30048671	0.328411	Name=Nrf1
NC_000067.6	175692322	175692466	0.330256	Name=Opn3
NC_000085.6	54047013	54047307	0.330878	Name=Adra2a
NC_000078.6	72761740	72761790	0.331561	Name=Ppm1a
NC_000077.6	64520609	64520799	0.332041	Name=Hs3st3a1
NC_000069.6	92024439	92024786	0.332229	Name=Pglyrp3
NC_000077.6	6006527	6006857	0.333452	Name=Gm40812
NC_000077.6	6006527	6006857	0.333452	Name=Camk2b
NC_000076.6	79988473	79988689	0.333712	Name=Cnn2
NC_000068.7	139678411	139678504	0.334263	Name=Ism1
NC_000072.6	29917149	29917309	0.334737	Name=Strip2
NC_000069.6	85971078	85971197	0.336128	Name=Sh3d19
NC_000080.6	16365600	16365699	0.33632	Name=Top2b
NC_000069.6	89322643	89322699	0.336332	Name=Efna3
NC_000070.6	117494394	117494509	0.337104	Name=Rnf220
NC_000080.6	122912933	122913034	0.337795	Name=Ggact
NC_000078.6	80168243	80168429	0.337827	Name=Actn1
NC_000071.6	24908590	24908681	0.337871	Name=Prkag2
NC_000071.6	135868167	135868512	0.338051	Name=Srrm3
NC_000085.6	25611154	25611213	0.33933	Name=Dmrt3
NC_000073.6	16614881	16615135	0.339499	Name=Gm29443
NC_000073.6	16614881	16615135	0.339499	Name=Arhgap35
NC_000067.6	74951665	74951755	0.339506	Name=Ihh
NC_000074.6	126593410	126593650	0.340436	Name=Irf2bp2
NC_000076.6	127091358	127091458	0.340574	Name=Agap2
NC_000076.6	120475243	120475380	0.341514	Name=Hmga2
NC_000067.6	73863111	73863178	0.342298	Name=6030407O03Rik
NC_000069.6	84259239	84259393	0.342435	Name=Trim2
NC_000074.6	12397319	12397414	0.342596	Name=Sox1
NC_000074.6	12397319	12397414	0.342596	Name=Gm5607
NC_000071.6	147315048	147315193	0.342803	Name=Urad
NC_000076.6	85184898	85185014	0.343135	Name=Cry1
NC_000072.6	4747533	4747811	0.343772	Name=Peg10
NC_000075.6	72925504	72925763	0.344084	Name=Pygo1
NC_000074.6	122501230	122501339	0.344864	Name=Piezo1
NC_000078.6	8772750	8772861	0.344936	Name=Sdc1
NC_000070.6	119474635	119474715	0.345298	Name=Rimkla
NC_000068.7	118901852	118902021	0.345427	Name=Bahd1
NC_000068.7	173232090	173232201	0.345712	Name=Pmepa1
NC_000078.6	51691209	51691435	0.345992	Name=Ap4s1
NC_000078.6	51691209	51691435	0.345992	Name=Strn3
NC_000070.6	129961242	129961313	0.346394	Name=1700003M07Rik
NC_000082.6	97962086	97962341	0.346885	Name=Zbtb21
NC_000073.6	128687847	128688171	0.347367	Name=Inpp5f
NC_000068.7	130906533	130906587	0.348153	Name=Atrn
NC_000073.6	141193713	141193779	0.348161	Name=Hras
NC_000068.7	20899824	20900152	0.349883	Name=Arhgap21
NC_000069.6	59006421	59006513	0.35126	Name=Med12l
NC_000068.7	174328690	174329030	0.351271	Name=Gnas
NC_000072.6	125096215	125096316	0.351543	Name=Gm32616
NC_000072.6	125096215	125096316	0.351543	Name=Chd4
NC_000081.6	12205140	12205375	0.351666	Name=Mtmr12
NC_000075.6	21547108	21547180	0.352273	Name=Carm1
NC_000077.6	6008254	6008310	0.352619	Name=Gm40812
NC_000077.6	6008254	6008310	0.352619	Name=Camk2b
NC_000085.6	18758812	18758962	0.35265	Name=Trpm6
NC_000085.6	21653305	21653523	0.35341	Name=Abhd17b
NC_000074.6	94913078	94913187	0.353942	Name=Ccdc102a
NC_000068.7	120731014	120731166	0.354819	Name=Cdan1
NC_000069.6	33143248	33143456	0.356153	Name=Pex5l
NC_000086.7	133898237	133898534	0.356518	Name=Tspan6
NC_000074.6	91805808	91805891	0.357039	Name=Irx3os
NC_000075.6	96544181	96544302	0.360371	Name=LOC108167675
NC_000075.6	96544181	96544302	0.360371	Name=Rasa2
NC_000075.6	75625779	75626228	0.361062	Name=Lysmd2
NC_000068.7	75831973	75832097	0.36152	Name=Gm34861
NC_000074.6	106252984	106253047	0.362606	Name=Smpd3
NC_000070.6	133011694	133011788	0.363366	Name=Ahdc1
NC_000077.6	83853447	83853536	0.36348	Name=Hnf1b
NC_000080.6	20694729	20694869	0.363694	Name=Sec24c
NC_000078.6	77238797	77239137	0.363727	Name=Fut8
NC_000083.6	24657918	24657968	0.363928	Name=Npw
NC_000077.6	6007519	6007626	0.364687	Name=Gm40812
NC_000077.6	6007519	6007626	0.364687	Name=Camk2b
NC_000077.6	43836129	43836559	0.365241	Name=Adra1b
NC_000081.6	89548801	89548894	0.366566	Name=Shank3
NC_000076.6	60125705	60125786	0.366858	Name=Spock2
NC_000072.6	4902980	4903210	0.367036	Name=Ppp1r9a
NC_000077.6	102317311	102317820	0.368138	Name=Ubtf
NC_000076.6	77211296	77211445	0.368319	Name=Gm40704
NC_000076.6	77211296	77211445	0.368319	Name=Gm35837
NC_000081.6	36792932	36793018	0.368541	Name=Ywhaz
NC_000082.6	92698749	92698980	0.368615	Name=Runx1
NC_000068.7	136095023	136095111	0.368885	Name=Pak7
NC_000086.7	74085523	74085595	0.369572	Name=Mecp2
NC_000079.6	58071173	58071593	0.370173	Name=Klhl3
NC_000068.7	24367416	24367788	0.370528	Name=Psd4
NC_000070.6	119492380	119492854	0.37187	Name=Rimkla
NC_000078.6	18853351	18853409	0.372771	Name=Gm40847
NC_000077.6	103339996	103340089	0.372896	Name=Arhgap27
NC_000083.6	56511624	56511835	0.373395	Name=Znrf4
NC_000077.6	100142149	100142214	0.373396	Name=Krt19
NC_000077.6	79591159	79591553	0.374631	Name=Rab11fip4
NC_000075.6	107590218	107590309	0.37466	Name=Ifrd2
NC_000068.7	29250164	29250406	0.374839	Name=6530402F18Rik
NC_000081.6	100870868	100871053	0.375069	Name=Scn8a
NC_000076.6	81192437	81192492	0.375088	Name=Dapk3
NC_000084.6	35889532	35889582	0.375145	Name=Gm36315
NC_000081.6	52040344	52040672	0.376188	Name=Aard
NC_000079.6	9764163	9764391	0.376352	Name=Zmynd11
NC_000086.7	168934740	168934851	0.376513	Name=Arhgap6
NC_000073.6	5053579	5053685	0.376924	Name=Zfp580
NC_000073.6	60004318	60004439	0.378638	Name=Snurf
NC_000073.6	60004318	60004439	0.378638	Name=Snrpn
NC_000078.6	117107162	117107468	0.379453	Name=Ptprn2
NC_000071.6	67842621	67842692	0.379595	Name=Atp8a1
NC_000067.6	90490509	90490658	0.379697	Name=Gm28722
NC_000068.7	118110398	118110478	0.379931	Name=Gm13986
NC_000079.6	103921536	103921843	0.380105	Name=D130037M23Rik
NC_000070.6	151108687	151109015	0.380148	Name=Camta1
NC_000083.6	25875494	25875739	0.380785	Name=0610011F06Rik
NC_000072.6	148444141	148444490	0.381214	Name=Tmtc1
NC_000078.6	116281832	116282080	0.381888	Name=Esyt2
NC_000080.6	46853740	46853863	0.382641	Name=Cgrrf1
NC_000072.6	56832082	56832405	0.382879	Name=Fkbp9
NC_000085.6	46330034	46330264	0.383833	Name=Fbxl15
NC_000085.6	46330034	46330264	0.383833	Name=Cuedc2
NC_000077.6	24100222	24100306	0.383867	Name=Bcl11a
NC_000069.6	145938259	145938641	0.383961	Name=2410004B18Rik
NC_000084.6	33993558	33993612	0.385092	Name=Epb41l4a
NC_000077.6	118415266	118415453	0.386104	Name=Cant1
NC_000080.6	29721557	29722027	0.38703	Name=Cacna2d3
NC_000071.6	123355970	123356140	0.387285	Name=Bcl7a
NC_000077.6	108920191	108920426	0.387968	Name=Axin2
NC_000080.6	118660248	118660356	0.388501	Name=Abcc4
NC_000076.6	19591996	19592269	0.388547	Name=Ifngr1
NC_000074.6	4677689	4677833	0.389763	Name=Gm6410
NC_000068.7	173251289	173251346	0.390051	Name=Pmepa1
NC_000079.6	28952067	28952235	0.391519	Name=Sox4
NC_000079.6	28952067	28952235	0.391519	Name=LOC108168071
NC_000083.6	65832970	65833035	0.391667	Name=Ppp4r1
NC_000078.6	73448986	73449269	0.392145	Name=Gm33929
NC_000082.6	11253809	11254085	0.392209	Name=Gspt1
NC_000076.6	4620915	4621174	0.392502	Name=Esr1
NC_000071.6	111273689	111273794	0.39405	Name=Ttc28
NC_000086.7	8191304	8191449	0.394792	Name=Ebp
NC_000070.6	148902206	148902313	0.394902	Name=Casz1
NC_000069.6	127922264	127922391	0.396494	Name=9830132P13Rik
NC_000086.7	12091610	12092031	0.397289	Name=LOC108168482
NC_000086.7	12091610	12092031	0.397289	Name=Bcor
NC_000074.6	125135282	125135375	0.397897	Name=Disc1
NC_000071.6	149051661	149052029	0.398231	Name=Hmgb1
NC_000085.6	21628334	21628536	0.398888	Name=1110059E24Rik
NC_000077.6	100525060	100525228	0.399214	Name=Acly
NC_000077.6	6008459	6008664	0.399535	Name=Gm40812
NC_000077.6	6008459	6008664	0.399535	Name=Camk2b
NC_000077.6	77216197	77216514	0.399543	Name=Ssh2
NC_000071.6	92849755	92849936	0.399798	Name=Shroom3
NC_000077.6	117285655	117285821	0.399868	Name=Sept9
NC_000086.7	12153526	12153640	0.399891	Name=Bcor
NC_000070.6	43507265	43507494	0.40108	Name=Car9
NC_000070.6	43507265	43507494	0.40108	Name=Arhgef39
NC_000075.6	13303966	13304226	0.403632	Name=Maml2
NC_000077.6	65140455	65140657	0.403956	Name=Arhgap44
NC_000084.6	64931382	64931750	0.406743	Name=Nedd4l
NC_000079.6	21814421	21814471	0.408111	Name=LOC108168067
NC_000070.6	125492307	125492383	0.408768	Name=Grik3
NC_000068.7	151869731	151869903	0.408871	Name=Rspo4
NC_000067.6	134987618	134987680	0.409612	Name=Lgr6
NC_000075.6	106249656	106249894	0.409882	Name=LOC102636338
NC_000073.6	134938306	134938406	0.409886	Name=Fam196a
NC_000073.6	134938306	134938406	0.409886	Name=Dock1
NC_000077.6	115047383	115047494	0.410296	Name=Cd300ld3
NC_000068.7	76675000	76675399	0.41045	Name=Plekha3
NC_000077.6	103252377	103252444	0.412236	Name=Map3k14
NC_000070.6	119246038	119246312	0.412689	Name=P3h1
NC_000081.6	82968798	82968911	0.414013	Name=Tcf20
NC_000073.6	70347345	70347533	0.414162	Name=Gm39030
NC_000083.6	66448642	66449237	0.414666	Name=Mtcl1
NC_000073.6	143174838	143174910	0.415501	Name=Kcnq1
NC_000086.7	13071941	13072412	0.417686	Name=Usp9x
NC_000069.6	37348513	37348957	0.418887	Name=Fgf2os
NC_000069.6	37348513	37348957	0.418887	Name=Fgf2
NC_000085.6	6084104	6084357	0.419086	Name=Zfpl1
NC_000076.6	78244136	78244741	0.420611	Name=Trappc10
NC_000079.6	109116468	109116785	0.421228	Name=Pde4d
NC_000071.6	106925770	106926083	0.423691	Name=Hfm1
NC_000070.6	44658720	44658912	0.424958	Name=Pax5
NC_000078.6	50649218	50649553	0.42578	Name=Prkd1
NC_000074.6	71633238	71633434	0.427889	Name=Unc13a
NC_000081.6	98714473	98714919	0.429203	Name=Ccdc65
NC_000068.7	156362390	156363250	0.430671	Name=Gm39972
NC_000068.7	156362390	156363250	0.430671	Name=Cnbd2
NC_000068.7	116064005	116064454	0.431312	Name=Meis2
NC_000070.6	136714589	136714744	0.432108	Name=Ephb2
NC_000078.6	76370045	76370208	0.43358	Name=Zbtb25
NC_000078.6	76370045	76370208	0.43358	Name=Zbtb1
NC_000068.7	79635122	79635566	0.434501	Name=LOC108168774
NC_000068.7	79635122	79635566	0.434501	Name=Ssfa2
NC_000083.6	35701478	35701708	0.434813	Name=Ddr1
NC_000086.7	167209980	167210183	0.435421	Name=Tmsb4x
NC_000076.6	128108429	128108587	0.435533	Name=Baz2a
NC_000071.6	88564831	88565166	0.436132	Name=Gm42107
NC_000071.6	88564831	88565166	0.436132	Name=Rufy3
NC_000077.6	79993356	79993412	0.436269	Name=Suz12
NC_000070.6	128737898	128738014	0.436867	Name=Phc2
NC_000086.7	52577587	52577638	0.437526	Name=A630012P03Rik
NC_000086.7	52577587	52577638	0.437526	Name=Gpc3
NC_000086.7	99046510	99046565	0.437698	Name=Stard8
NC_000072.6	30864264	30864371	0.438706	Name=Copg2
NC_000070.6	148041565	148041663	0.439633	Name=Mthfr
NC_000067.6	136173531	136173630	0.440097	Name=Kif21b
NC_000072.6	77516702	77516791	0.440548	Name=Ctnna2
NC_000072.6	124443630	124443892	0.442518	Name=Clstn3
NC_000086.7	73635464	73635698	0.442888	Name=LOC108168457
NC_000085.6	7293209	7293450	0.442935	Name=Mark2
NC_000070.6	134160648	134161119	0.44358	Name=LOC108169013
NC_000070.6	134160648	134161119	0.44358	Name=Cep85
NC_000078.6	79154210	79154317	0.443713	Name=Arg2
NC_000083.6	90592234	90592413	0.443722	Name=Nrxn1
NC_000075.6	63553388	63553548	0.443868	Name=Iqch
NC_000086.7	98222627	98222983	0.446853	Name=Ar
NC_000076.6	87884380	87884662	0.44761	Name=Igf1
NC_000077.6	95805778	95805924	0.448356	Name=Gm29933
NC_000083.6	87974913	87975293	0.451805	Name=Msh6
NC_000079.6	59632457	59632552	0.452042	Name=Naa35
NC_000071.6	116175262	116175375	0.453978	Name=Ccdc60
NC_000077.6	70812056	70812133	0.457456	Name=Scimp
NC_000068.7	181468129	181468203	0.457939	Name=Zbtb46
NC_000067.6	30873447	30873726	0.459847	Name=Phf3
NC_000073.6	110878057	110878287	0.461985	Name=Mrvi1
NC_000067.6	82832108	82832277	0.462525	Name=Gm34450
NC_000071.6	35056598	35056660	0.463225	Name=Dok7
NC_000073.6	16011673	16011957	0.463351	Name=Gltscr1
NC_000073.6	145302904	145303012	0.463677	Name=Mrgprf
NC_000079.6	110153464	110153555	0.46404	Name=Rab3c
NC_000080.6	64664104	64664156	0.46426	Name=Kif13b
NC_000075.6	74860568	74860634	0.46576	Name=Gm33562
NC_000074.6	120036245	120036481	0.466419	Name=Crispld2
NC_000071.6	65435742	65436106	0.467136	Name=Ugdh
NC_000081.6	57695654	57695946	0.468269	Name=Zhx2
NC_000086.7	43428279	43428583	0.468479	Name=Tenm1
NC_000073.6	128633295	128633402	0.469127	Name=Inpp5f
NC_000073.6	127026205	127026633	0.470861	Name=Maz
NC_000070.6	45506634	45506750	0.472425	Name=Shb
NC_000087.7	787116	787239	0.474822	Name=Zfy1
NC_000071.6	65504772	65504838	0.474896	Name=Smim14
NC_000070.6	150776126	150776291	0.478529	Name=Gm36806
NC_000078.6	3980808	3980967	0.479448	Name=Efr3b
NC_000070.6	150302268	150302340	0.479563	Name=Rere
NC_000086.7	134951057	134951212	0.481158	Name=Nxf2
NC_000083.6	58138041	58138257	0.481792	Name=Cntnap5c
NC_000068.7	121594548	121594698	0.484166	Name=Frmd5
NC_000078.6	81483628	81483829	0.48597	Name=Synj2bp-cox16
NC_000078.6	81483628	81483829	0.48597	Name=Cox16
NC_000082.6	31068425	31068510	0.491331	Name=Xxylt1
NC_000068.7	165726874	165726968	0.491341	Name=Eya2
NC_000079.6	29431101	29431191	0.491409	Name=Cdkal1
NC_000080.6	20793567	20793619	0.493205	Name=Camk2g
NC_000086.7	48026034	48026112	0.494426	Name=Apln
NC_000072.6	125374924	125374994	0.49464	Name=Plekhg6
NC_000077.6	118595870	118596053	0.50081	Name=Rbfox3
NC_000077.6	120120036	120120342	0.50301	Name=Slc38a10
NC_000077.6	89574692	89574775	0.503598	Name=Ankfn1
NC_000072.6	63975478	63975587	0.504376	Name=Grid2
NC_000070.6	106988631	106988689	0.504644	Name=Ssbp3
NC_000074.6	32937459	32937509	0.504885	Name=Gm3985
NC_000073.6	4780117	4780192	0.505869	Name=Il11
NC_000083.6	8008279	8008447	0.507526	Name=Gm1604a
NC_000071.6	134751468	134751522	0.511034	Name=Gm30003
NC_000084.6	89704149	89704439	0.511035	Name=Dok6
NC_000079.6	11732188	11732431	0.512631	Name=Ryr2
NC_000070.6	129059189	129059365	0.513062	Name=Rnf19b
NC_000076.6	89617796	89617914	0.523432	Name=Slc17a8
NC_000076.6	79929167	79929297	0.527625	Name=Arid3a
NC_000080.6	76034063	76034297	0.528248	Name=Gm36477
NC_000068.7	90580059	90580557	0.530475	Name=Ptprj
NC_000069.6	126480208	126480357	0.537818	Name=LOC108168898
NT_166438.1	162608	162751	0.540982	Name=LOC624931
NC_000068.7	58737492	58737565	0.542482	Name=Upp2
NC_000071.6	128071648	128071808	0.544647	Name=Tmem132d
NC_000086.7	55565754	55565893	0.547244	Name=Gm16404
NC_000068.7	153529969	153530576	0.549756	Name=Nol4l
NC_000075.6	4750174	4750251	0.551383	Name=Gria4
NC_000071.6	21055753	21056184	0.557614	Name=Ptpn12
NC_000071.6	21055753	21056184	0.557614	Name=Gm42221
NC_000068.7	142733787	142733856	0.559832	Name=Kif16b
NC_000068.7	25767215	25767389	0.561574	Name=Lcn3
NC_000077.6	71202809	71202976	0.56595	Name=Nlrp1b
NT_166305.2	1937817	1937878	0.574434	Name=Lmntd1
NC_000069.6	40453609	40453758	0.576271	Name=Gm30184
NC_000086.7	42072115	42072190	0.577883	Name=Xiap
NC_000068.7	168015916	168016000	0.591436	Name=Fam65c
NC_000072.6	48184671	48184736	0.594978	Name=Gm16630
NC_000079.6	59015600	59015808	0.610384	Name=Ntrk2
NC_000070.6	149404861	149405120	0.616684	Name=Ube4b
NC_000068.7	60119347	60119420	0.620898	Name=Baz2b
NC_000086.7	164281135	164281293	0.64654	Name=Pir
NC_000070.6	148820076	148820396	0.651719	Name=Casz1
NC_000086.7	73096824	73097047	0.658336	Name=Xlr3a
NC_000082.6	41860051	41860105	0.66228	Name=Lsamp
NC_000083.6	8122928	8123011	0.666578	Name=Gm41523
NC_000085.6	10229904	10230004	0.676108	Name=Myrf
NC_000075.6	98815036	98815127	0.694367	Name=E330023G01Rik

## Sheet: 6. DMR d5 vs d3 TSS
Differentially methylated regions (DMRs) at TSS between day5 and day 3 DDC-damaged livers from littermate controls. Genes with DMRs ≥25% are shown. Column D, Methylation/Hydroxymethylation difference, positive value means loss of 5mC or 5hmC
Chromosome	Start	End	Difference	Gene Name
NC_000082.6	78376474	78377056	0.524066	Btg3
NC_000070.6	33248056	33248582	0.477939	Pnrc1
NC_000074.6	79399044	79399543	0.411348	Smad1
NC_000079.6	107022332	107022777	0.370646	3830408C21Rik
NC_000079.6	107022332	107022777	0.370646	Kif2a
NC_000081.6	79804379	79804846	0.412781	Nptxr
NC_000077.6	120721323	120721783	0.385621	Rac3
NC_000068.7	26021430	26021931	0.516212	Ubac1
NC_000074.6	11497502	11497991	0.456633	Carkd
NC_000073.6	16815951	16816481	0.40601	Strn4
NC_000073.6	16815951	16816481	0.40601	Fkrp
NC_000072.6	119847886	119848300	0.43642	3110021A11Rik
NC_000072.6	119847886	119848300	0.43642	Erc1
NC_000081.6	80173524	80173927	0.448107	Mgat3
NC_000075.6	23222964	23223480	0.366241	Bmper
NC_000067.6	164457670	164458066	0.534533	Gm32391
NC_000067.6	164457670	164458066	0.534533	Atp1b1
NC_000069.6	103279604	103279900	0.362391	Trim33
NC_000073.6	19822405	19822830	0.520491	Bcl3
NC_000073.6	134224623	134225115	0.536712	Adam12
NC_000075.6	60712916	60713457	0.419383	Larp6
NC_000069.6	57847351	57847801	0.424494	Pfn2
NC_000069.6	58576884	58577236	0.365093	Selt
NC_000067.6	60098347	60098816	0.407468	Wdr12
NC_000067.6	60098347	60098816	0.407468	Carf
NC_000078.6	32060803	32061199	0.398616	Prkar2b
NC_000078.6	112679207	112679779	0.415208	Zbtb42
NC_000068.7	125123246	125123572	0.361777	LOC108168787
NC_000068.7	125123246	125123572	0.361777	Myef2
NC_000067.6	134361765	134362168	0.445912	Tmem183a
NC_000073.6	100227452	100227898	0.404303	Pgm2l1
NC_000073.6	100227452	100227898	0.404303	Gm34877
NC_000079.6	21812761	21814304	0.562143	LOC108168067
NC_000075.6	31030437	31030794	0.402126	Zbtb44
NC_000075.6	70012466	70012846	0.353392	Gtf2a2
NC_000072.6	47594745	47595022	0.309024	Ezh2
NC_000074.6	87958685	87959088	0.392853	Zfp423
NC_000073.6	7298376	7298893	0.426262	Mir5620
NC_000073.6	35119178	35119675	0.378665	Cebpa
NC_000071.6	8622389	8622797	0.373118	Rundc3b
NC_000080.6	46882807	46883227	0.403027	Samd4
NC_000080.6	46882807	46883227	0.403027	Gm34934
NC_000078.6	24651343	24651679	0.386926	Klf11
NC_000076.6	70599487	70599807	0.347769	LOC108167819
NC_000076.6	70599487	70599807	0.347769	Phyhipl
NC_000086.7	159627516	159627906	0.496044	Sh3kbp1
NC_000073.6	67372657	67373095	0.398062	Mef2a
NC_000068.7	13793294	13793743	0.413453	St8sia6
NC_000067.6	170215088	170215476	0.385191	Uhmk1
NC_000070.6	149737622	149737985	0.444779	Tmem201
NC_000070.6	129820277	129820690	0.41315	Ptp4a2
NC_000080.6	27622234	27622566	0.495432	Erc2
NC_000068.7	67565711	67566033	0.358689	B3galt1
NC_000075.6	113707956	113708285	0.326275	Pdcd6ip
NC_000082.6	38742128	38742492	0.344456	B4galt4
NC_000081.6	96698794	96699048	0.371659	Slc38a2
NC_000077.6	119549309	119549725	0.358499	Gm11762
NC_000077.6	119549309	119549725	0.358499	Nptx1
NC_000078.6	111485513	111485964	0.423414	Gm266
NC_000068.7	35109403	35109854	0.356636	Cntrl
NC_000073.6	82335250	82335530	0.61752	Adamtsl3
NC_000077.6	4947652	4947983	0.411399	Ap1b1
NC_000077.6	4947652	4947983	0.411399	Nefh
NC_000072.6	59208714	59209078	0.339674	Tigd2
NC_000068.7	52072776	52073062	0.355692	Rif1
NC_000071.6	124861852	124862207	0.315631	Zfp664
NC_000071.6	124861852	124862207	0.315631	Ccdc92
NC_000084.6	34860542	34860959	0.40567	Egr1
NC_000071.6	115193356	115193689	0.450625	Gm35515
NC_000071.6	115193356	115193689	0.450625	Cabp1
NC_000068.7	80315462	80315803	0.419022	Dnajc10
NC_000076.6	39732308	39732658	0.387118	Rev3l
NC_000076.6	39732308	39732658	0.387118	E130307A14Rik
NC_000082.6	84835430	84835800	0.405218	Gabpa
NC_000082.6	84835430	84835800	0.405218	Atp5j
NC_000071.6	142960905	142961160	0.325366	Fscn1
NC_000084.6	31910711	31910924	0.364525	Sft2d3
NC_000073.6	126502944	126503326	0.355092	Atxn2l
NC_000073.6	126502944	126503326	0.355092	LOC105243053
NC_000074.6	47989839	47990261	0.367985	Wwc2
NC_000073.6	46845686	46845961	0.427082	Ldha
NC_000075.6	120303849	120304172	0.338849	Myrip
NC_000074.6	86884779	86885022	0.321995	N4bp1
NC_000067.6	7089015	7089290	0.359982	Pcmtd1
NC_000072.6	114131198	114131412	0.335179	Slc6a11
NC_000085.6	46056488	46056888	0.363651	Pprc1
NC_000074.6	106936020	106936376	0.395536	Sntb2
NC_000086.7	8145547	8145955	0.59499	Rbm3os
NC_000086.7	8145547	8145955	0.59499	Rbm3
NC_000078.6	33957807	33957989	0.613865	Twist1
NC_000070.6	152297238	152297583	0.489157	Icmt
NC_000071.6	33434242	33434525	0.4389	Nkx1-1
NC_000078.6	20920976	20921192	0.336758	3110053B16Rik
NC_000073.6	79464844	79465179	0.461874	n-TRtcg5
NC_000078.6	101082924	101083161	0.331687	D130020L05Rik
NC_000078.6	101082924	101083161	0.331687	Smek1
NC_000069.6	52269062	52269372	0.391072	Foxo1
NC_000071.6	71657756	71658132	0.328126	Gabrb1
NC_000071.6	71657756	71658132	0.328126	Gabra4
NC_000068.7	131041336	131041548	0.352386	Mir6973b
NC_000071.6	62766109	62766574	0.399423	Arap2
NC_000069.6	123447227	123447589	0.372897	Prss12
NC_000076.6	53597351	53597562	0.37779	Asf1a
NC_000076.6	53597351	53597562	0.37779	Gm3902
NC_000081.6	76457352	76457870	0.347735	Scx
NC_000070.6	106678710	106679101	0.454763	Ttc4
NC_000079.6	75943587	75943842	0.364018	Rhobtb3
NC_000072.6	4747760	4748075	0.373823	Peg10
NC_000072.6	4747760	4748075	0.373823	Sgce
NC_000071.6	67427148	67427439	0.364714	Bend4
NC_000074.6	124897073	124897334	0.385747	Sprtn
NC_000074.6	124897073	124897334	0.385747	Exoc8
NC_000067.6	165459895	165460156	0.371999	Mpc2
NC_000067.6	165459895	165460156	0.371999	Dcaf6
NC_000071.6	65435807	65436067	0.44963	Ugdh
NC_000074.6	47674613	47674840	0.375183	Ing2
NC_000083.6	64331437	64331711	0.322058	Pja2
NC_000079.6	110394703	110394999	0.351559	Plk2
NC_000068.7	11777364	11777687	0.318503	Ankrd16
NC_000068.7	11777364	11777687	0.318503	Fbxo18
NC_000068.7	32741474	32741875	0.334888	6330409D20Rik
NC_000078.6	30373079	30373471	0.427669	Sntg2
NC_000071.6	53998852	53999068	0.360876	Stim2
NC_000069.6	53041638	53041990	0.38566	Lhfp
NC_000086.7	53056870	53057203	0.34726	C430049B03Rik
NC_000082.6	97922154	97922436	0.349669	C2cd2
NC_000075.6	50857082	50857386	0.353893	Ppp2r1b
NC_000077.6	33203315	33203576	0.363393	Tlx3
NC_000068.7	18997991	18998205	0.385155	4930426L09Rik
NC_000068.7	18997991	18998205	0.385155	Pip4k2a
NC_000085.6	53600748	53600995	0.358159	Smc3
NC_000075.6	7764145	7764348	0.331055	Tmem123
NC_000078.6	112829371	112829550	0.343131	Cdca4
NC_000069.6	152346470	152346735	0.330283	Usp33
NC_000072.6	144781487	144781963	0.351603	Sox5
NC_000076.6	121586589	121586742	0.317047	Tbk1
NC_000068.7	84715034	84715219	0.37004	Gm32289
NC_000068.7	84715034	84715219	0.37004	Zdhhc5
NC_000085.6	25236666	25236950	0.349185	Kank1
NC_000078.6	69892918	69893193	0.339545	Atl1
NC_000078.6	69892918	69893193	0.339545	Map4k5
NC_000067.6	38627698	38628193	0.419632	Aff3
NC_000072.6	148945752	148946007	0.341107	3010003L21Rik
NC_000072.6	148945752	148946007	0.341107	Fam60a
NC_000073.6	143107180	143107479	0.409921	Kcnq1
NC_000071.6	110879548	110879784	0.322791	Ttc28
NC_000079.6	34916729	34917079	0.372945	4933417A18Rik
NC_000072.6	85512141	85512555	0.4257	Egr4
NC_000070.6	155222573	155222709	0.364749	Ski
NC_000068.7	25318567	25318939	0.345344	Grin1
NC_000069.6	66981223	66981436	0.339677	Rsrc1
NC_000069.6	66981223	66981436	0.339677	Shox2
NC_000084.6	80151175	80151433	0.335731	Adnp2
NC_000086.7	6172089	6172434	0.634946	Nudt10
NC_000071.6	146385235	146385414	0.333047	Wasf3
NC_000068.7	25272479	25272686	0.408724	Anapc2
NC_000068.7	25272479	25272686	0.408724	Ssna1
NC_000074.6	123653964	123654080	0.34533	Gm35874
NC_000074.6	123653964	123654080	0.34533	Rhou
NC_000068.7	165595051	165595209	0.315929	Eya2
NC_000084.6	21001546	21001735	0.32912	Rnf138
NC_000069.6	37640234	37640400	0.329924	Spry1
NC_000068.7	31887290	31887543	0.337923	Lamc3
NC_000070.6	120746813	120747136	0.366816	Kcnq4
NC_000068.7	130295905	130296187	0.386933	Ebf4
NC_000068.7	130295905	130296187	0.386933	Gm30169
NC_000086.7	74428146	74428589	0.481432	G6pdx
NC_000077.6	5261055	5261441	0.402472	Kremen1
NC_000077.6	5261055	5261441	0.402472	LOC108167881
NC_000070.6	141301279	141301494	0.325802	Epha2
NC_000070.6	132260990	132261235	0.529033	Gm28874
NC_000070.6	132260990	132261235	0.529033	Gmeb1
NC_000071.6	114443727	114444055	0.418318	Mvk
NC_000071.6	114443727	114444055	0.418318	Mmab
NC_000068.7	91526952	91527146	0.327247	Ckap5
NC_000068.7	174327806	174328044	0.414978	Gm30189
NC_000077.6	72051017	72051284	0.351274	LOC108167909
NC_000079.6	46501783	46502144	0.373239	Cap2
NC_000067.6	75506245	75506544	0.404908	Inha
NC_000067.6	75506245	75506544	0.404908	Obsl1
NC_000071.6	127241349	127241667	0.418414	Tmem132c
NC_000067.6	119837509	119837720	0.343618	Ptpn4
NC_000072.6	122339322	122339551	0.414005	Phc1
NC_000083.6	26948615	26948745	0.328647	Mir3083
NC_000083.6	46628761	46629056	0.37074	Ptk7
NC_000074.6	93810534	93810806	0.45075	Gnao1
NC_000080.6	64652672	64652836	0.354721	Kif13b
NC_000083.6	5841744	5841887	0.325463	Snx9
NC_000071.6	67607492	67607769	0.397601	Shisa3
NC_000073.6	79148876	79149128	0.335392	Mfge8
NC_000082.6	38484023	38484474	0.380149	Gm41453
NC_000080.6	25459073	25459240	0.329157	Zmiz1
NC_000080.6	25459073	25459240	0.329157	Zmiz1os1
NC_000073.6	45628419	45628535	0.340717	Rasip1
NC_000082.6	88289727	88290048	0.488873	Grik1
NC_000075.6	74860568	74860994	0.428368	Onecut1
NC_000084.6	60774550	60774775	0.35163	Rps14
NC_000079.6	17804952	17805069	0.375695	Cdk13
NC_000082.6	97851323	97851458	0.335076	Prdm15
NC_000067.6	162477893	162478257	0.356679	Dnm3
NC_000074.6	120229326	120229449	0.315016	Gse1
NC_000074.6	120229326	120229449	0.315016	A330074K22Rik
NC_000078.6	77238661	77238771	0.302904	Fut8
NC_000078.6	84875602	84875852	0.372924	D030025P21Rik
NC_000070.6	129461281	129461651	0.36945	Bsdc1
NC_000067.6	69687500	69687599	0.334038	Ikzf2
NC_000070.6	48473097	48473240	0.334449	Tex10
NC_000075.6	40685984	40686204	0.456594	Clmp
NC_000072.6	124857461	124857614	0.333951	Gm32404
NC_000072.6	124857461	124857614	0.333951	P3h3
NC_000072.6	124857461	124857614	0.333951	LOC108169168
NC_000078.6	84996497	84996619	0.325861	Ylpm1
NC_000067.6	85793743	85793885	0.319514	Cab39
NC_000074.6	126593481	126593561	0.339159	Irf2bp2
NC_000083.6	12318501	12318779	0.365866	4732491K20Rik
NC_000083.6	12318501	12318779	0.365866	Map3k4
NC_000068.7	132577511	132577738	0.400207	Gpcpd1
NC_000073.6	4789341	4789474	0.386561	Tmem238
NC_000077.6	78165241	78165469	0.322116	Traf4
NC_000083.6	50190449	50190529	0.323495	Rftn1
NC_000076.6	62980257	62980402	0.336027	Rufy2
NC_000078.6	112588611	112588849	0.341319	Inf2
NC_000068.7	137116253	137116361	0.335231	Jag1
NC_000079.6	42052480	42052794	0.406764	Hivep1
NC_000075.6	72532141	72532357	0.381226	Rfx7
NC_000075.6	72532141	72532357	0.381226	4930509E16Rik
NC_000081.6	39197991	39198135	0.361568	Rims2
NC_000067.6	86018165	86018390	0.363517	Spata3
NC_000084.6	84085450	84085536	0.338573	Zadh2
NC_000085.6	34878560	34878683	0.342369	Pank1
NC_000084.6	64661082	64661338	0.354892	Atp8b1
NC_000079.6	74062278	74062528	0.383709	Cep72
NC_000073.6	143460600	143460795	0.351084	Cdkn1c
NC_000080.6	20734107	20734259	0.349484	Ndst2
NC_000086.7	141725226	141725626	0.381197	Irs4
NC_000077.6	21091515	21091614	0.366879	Peli1
NC_000071.6	111417510	111417624	0.333595	Mn1
NC_000079.6	9094281	9094488	0.376829	Larp4b
NC_000074.6	36249228	36249338	0.327909	Lonrf1
NC_000070.6	57956376	57956533	0.373095	Gm35344
NC_000070.6	57956376	57956533	0.373095	Txn1
NC_000070.6	100096318	100096426	0.369818	Ror1
NC_000070.6	100096318	100096426	0.369818	Gm35701
NC_000077.6	5707681	5707864	0.354046	Mrps24
NC_000071.6	124095616	124095819	0.353288	Abcb9
NC_000071.6	22344640	22344714	0.322985	Reln
NC_000073.6	4793307	4793484	0.34801	Rpl28
NC_000086.7	20425379	20425742	0.472096	Jade3
NC_000069.6	51341608	51341883	0.387557	Elf2
NC_000068.7	71787234	71787384	0.349083	Itga6
NC_000082.6	5049485	5049698	0.344441	Ubn1
NC_000082.6	5049485	5049698	0.344441	Glyr1
NC_000083.6	25570061	25570267	0.395514	2810468N07Rik
NC_000083.6	25570061	25570267	0.395514	Sox8
NC_000086.7	16817168	16817511	0.402131	Maob
NC_000073.6	144582178	144582342	0.377444	Fadd
NC_000080.6	41264553	41264919	0.420689	Gm2832
NC_000077.6	98358389	98358610	0.378317	Stard3
NC_000077.6	98358389	98358610	0.378317	1700003D09Rik
NC_000076.6	5550566	5550811	0.395461	Syne1
NC_000083.6	87447146	87447288	0.350273	Calm2
NC_000070.6	134160785	134161041	0.460841	LOC108169013
NC_000068.7	34639016	34639246	0.433969	Gm34372
NC_000080.6	54296699	54297017	0.575216	LOC108168162
NC_000078.6	72761345	72761543	0.359898	Ppm1a
NC_000083.6	25861289	25861383	0.322837	Wdr90
NC_000074.6	33516954	33517153	0.40094	Tex15
NC_000074.6	123540548	123540802	0.399271	n-R5s100
NC_000073.6	111082431	111082516	0.337265	Eif4g2
NC_000068.7	18676555	18676639	0.333173	Bmi1
NC_000075.6	45138584	45138713	0.36236	Scn4b
NC_000070.6	134343093	134343216	0.335131	Slc30a2
NC_000080.6	111676071	111676338	0.459818	Gm30439
NC_000080.6	111676071	111676338	0.459818	Slitrk5
NC_000068.7	120730973	120731099	0.402439	Cdan1
NC_000073.6	16273137	16273293	0.383737	Inafm1
NC_000071.6	101765405	101765518	0.347665	Cds1
NC_000070.6	100527484	100527866	0.414706	Ube2uos
NC_000070.6	154528629	154528956	0.376859	Gm13133
NC_000070.6	70534996	70535085	0.321798	Megf9
NC_000068.7	178414059	178414309	0.362866	Fam217b
NC_000068.7	178414059	178414309	0.362866	Ppp1r3d
NC_000077.6	97766181	97766455	0.365316	Cwc25
NC_000085.6	29648113	29648167	0.313252	Ermp1
NC_000071.6	114567955	114568107	0.343933	Fam222a
NC_000077.6	68901529	68901623	0.314017	Rpl26
NC_000070.6	59805915	59806064	0.369427	Snx30
NC_000079.6	105293836	105294026	0.363467	Rnf180
NC_000071.6	122502258	122502346	0.344791	Atp2a2
NC_000068.7	161109527	161109733	0.383788	Chd6
NC_000081.6	101224423	101224515	0.327128	Grasp
NC_000081.6	101224423	101224515	0.327128	A330009N23Rik
NC_000078.6	84996714	84996818	0.337079	Ylpm1
NC_000079.6	46669784	46669855	0.330687	Fam8a1
NC_000079.6	53504761	53505046	0.46655	Gm40952
NC_000075.6	87730292	87730367	0.316801	Tbx18
NC_000067.6	133046583	133046708	0.364345	Pik3c2b
NC_000068.7	180641971	180642051	0.328035	Gm30345
NC_000068.7	180641971	180642051	0.328035	Tcfl5
NC_000071.6	122502404	122502461	0.378415	Atp2a2
NC_000074.6	89025713	89025810	0.323038	Mir8110
NC_000083.6	29888192	29888336	0.337941	Gm16758
NC_000083.6	29888192	29888336	0.337941	Mdga1
NC_000085.6	3719515	3719617	0.350655	Gm36871
NC_000077.6	79590968	79591121	0.362796	Rab11fip4
NC_000084.6	9707520	9707641	0.358056	Colec12
NC_000085.6	55099418	55099479	0.319204	Gm31356
NC_000073.6	120917708	120917774	0.30957	n-TLaag4
NC_000073.6	120917708	120917774	0.30957	Polr3e
NC_000067.6	161876432	161876533	0.361805	Suco
NC_000074.6	84687441	84687549	0.362514	Nacc1
NC_000077.6	78466392	78466597	0.476647	Slc46a1
NC_000069.6	67463758	67463923	0.420059	Lxn
NC_000068.7	30171414	30171515	0.346675	Endog
NC_000075.6	86464516	86464608	0.348964	Ube2cbp
NC_000070.6	133212348	133212434	0.319499	Gpr3
NC_000078.6	99964338	99964582	0.357257	Kcnk13
NC_000081.6	99224629	99224725	0.368477	Kcnh3
NC_000081.6	99224629	99224725	0.368477	LOC108168265
NC_000077.6	100673322	100673498	0.387843	Dhx58os
NC_000077.6	114675485	114675586	0.333259	Ttyh2
NC_000081.6	76294299	76294420	0.336941	Smpd5
NC_000071.6	106695921	106696000	0.412827	Zfp644
NC_000076.6	80115265	80115371	0.314104	Stk11
NC_000074.6	84800064	84800126	0.322951	Nfix
NC_000083.6	79020510	79020605	0.341808	Prkd3
NC_000074.6	31111862	31112018	0.40632	Rnf122
NC_000073.6	45240727	45240865	0.346131	Cd37
NC_000073.6	45240727	45240865	0.346131	Slc6a16
NC_000079.6	112652085	112652141	0.317298	Ddx4
NC_000079.6	92354745	92354847	0.34764	Dhfr
NC_000079.6	92354745	92354847	0.34764	Msh3
NC_000075.6	95845165	95845215	0.320317	Pls1
NC_000068.7	162931976	162932046	0.389861	Srsf6
NC_000073.6	19562032	19562107	0.312304	Ppp1r37
NC_000083.6	6037628	6037998	0.451868	LOC108168335
NC_000077.6	54787592	54787677	0.351077	Cdc42se2
NC_000075.6	15709933	15710018	0.320271	Slc36a4
NC_000073.6	90443627	90443682	0.314007	Crebzf
NC_000074.6	48843407	48843486	0.38519	Gm19744
NC_000082.6	94328528	94328700	0.368129	Ripply3
NC_000081.6	102921775	102921890	0.373695	Hoxc13
NC_000068.7	151009283	151009361	0.340949	Ninl
NC_000073.6	60004711	60004870	0.365892	Snurf
NC_000085.6	10304494	10304635	0.399829	Dagla
NC_000068.7	39226381	39226492	0.383495	Ppp6c
NC_000074.6	83973092	83973156	0.372724	Prkaca
NC_000076.6	100143915	100144048	0.350043	Gm35533
NC_000076.6	119454284	119454405	0.361319	Grip1
NC_000086.7	7572604	7572888	0.588525	Ppp1r3fos
NC_000078.6	78748696	78748770	0.337929	Mpp5
NC_000068.7	131041187	131041261	0.319518	Mir6973b
NC_000074.6	24948798	24948906	0.336912	Adam32
NC_000076.6	128695911	128696066	0.351218	Rab5b
NC_000076.6	40349562	40349637	0.325013	Cdk19
NC_000075.6	112235354	112235453	0.349366	Arpp21
NC_000083.6	68837127	68837178	0.349265	Tmem200c
NC_000083.6	68837127	68837178	0.349265	Gm38593
NC_000068.7	172345482	172345584	0.379895	Fam210b
NC_000075.6	67760459	67760522	0.3539	LOC102633151
NC_000085.6	23687466	23687557	0.335671	Ptar1
NC_000076.6	128747760	128747878	0.342964	Pym1
NC_000076.6	128747760	128747878	0.342964	Dgka
NC_000075.6	50617232	50617286	0.325899	Pih1d2
NC_000075.6	50617232	50617286	0.325899	AU019823
NC_000067.6	72824447	72824563	0.346932	Igfbp2
NC_000072.6	30958943	30959068	0.441282	Klf14
NC_000075.6	59578486	59578576	0.34452	Celf6
NC_000072.6	120665808	120665887	0.372647	Cecr2
NC_000068.7	180104541	180104591	0.356032	Hrh3
NC_000067.6	92832019	92832127	0.362382	Gpc1
NC_000072.6	102564520	102564577	0.333217	Cntn3
NC_000071.6	108366569	108366653	0.355899	Gm10419
NC_000079.6	48262042	48262171	0.359598	Id4
NC_000079.6	48262042	48262171	0.359598	A330033J07Rik
NC_000070.6	130047845	130047943	0.355413	Col16a1
NC_000068.7	31887596	31887661	0.344939	Lamc3
NC_000072.6	116673570	116673669	0.330429	Rassf4
NC_000085.6	6979757	6979911	0.39899	Gm41803
NC_000085.6	6979757	6979911	0.39899	Fkbp2
NC_000082.6	37384913	37384984	0.312997	Stxbp5l
NC_000080.6	34673560	34673624	0.331361	Wapl
NC_000084.6	38600647	38600703	0.360367	Spry4
NC_000067.6	168432442	168432557	0.34328	Pbx1
NC_000067.6	130715771	130715864	0.363164	Yod1
NC_000074.6	78437983	78438074	0.36688	Pou4f2
NC_000076.6	12964625	12964758	0.35714	Stx11
NC_000072.6	29179431	29179506	0.363249	Prrt4
NC_000074.6	91799549	91799623	0.364651	Gm39222
NC_000078.6	103313952	103314164	0.384776	Gm29508
NC_000070.6	155992175	155992242	0.327825	Sdf4
NC_000070.6	155992175	155992242	0.327825	B3galt6
NC_000071.6	92603050	92603179	0.444374	Stbd1
NC_000082.6	33684329	33684406	0.358002	Heg1
NC_000083.6	87636528	87636593	0.364744	Epcam
NC_000081.6	80133199	80133291	0.318703	Tab1
NC_000068.7	156362608	156362714	0.437447	Gm39972
NC_000077.6	23307023	23307082	0.341455	Usp34
NC_000077.6	23307023	23307082	0.341455	Gm3718
NC_000071.6	115507044	115507135	0.427676	Pxn
NC_000072.6	56714833	56714886	0.31439	Avl9
NC_000079.6	96132429	96132510	0.373029	Gm29543
NC_000079.6	96132429	96132510	0.373029	Sv2c
NC_000070.6	141445168	141445220	0.437561	Gm42337
NC_000070.6	141445168	141445220	0.437561	Zbtb17
NC_000073.6	70337898	70338027	0.486142	Gm29683
NC_000073.6	40899548	40899646	0.356888	A230077H06Rik
NC_000081.6	7810385	7810442	0.351648	Gdnf
NC_000071.6	123394447	123394514	0.43431	Mlxip
NC_000083.6	6429907	6430087	0.368796	Dynlt1b
NC_000082.6	85215511	85215647	0.410651	Gm41482
NC_000074.6	9977666	9977733	0.373237	Abhd13
NC_000074.6	9977666	9977733	0.373237	Lig4
NC_000084.6	31939421	31939563	0.360399	LOC108168375
NC_000071.6	115907541	115907646	0.374105	Gm42008
NC_000067.6	74951966	74952027	0.356022	Ihh
NC_000074.6	124896449	124896501	0.341326	Sprtn
NC_000083.6	30626830	30626884	0.40921	Dnah8
NC_000083.6	30626830	30626884	0.40921	1700097N02Rik
NC_000071.6	119671398	119671523	0.340032	Tbx3os1
NC_000074.6	105893610	105893679	0.379526	Nrn1l
NC_000070.6	124658797	124658909	0.338315	Gm2164
NC_000079.6	91461545	91461597	0.417741	Ssbp2
NC_000076.6	85102319	85102404	0.345351	Tmem263
NC_000076.6	85102319	85102404	0.345351	Fhl4
NC_000086.7	36795619	36795702	0.406098	Slc25a5
NC_000086.7	53056748	53056816	0.346652	C430049B03Rik
NC_000077.6	77983426	77983552	0.392833	Phf12
NC_000080.6	105258451	105258534	0.356281	Ndfip2
NC_000067.6	83407594	83407697	0.404225	Sphkap
NC_000070.6	52989097	52989175	0.381721	Nipsnap3a
NC_000075.6	27030965	27031037	0.34966	Ncapd3
NC_000075.6	27030965	27031037	0.34966	Vps26b
NC_000085.6	42035763	42035874	0.458947	Ankrd2
NC_000069.6	146684897	146684950	0.349419	Gm36521
NC_000079.6	67863779	67863849	0.395578	BC048507
NC_000073.6	73608950	73609021	0.430252	Gm30149
NC_000085.6	45146694	45146759	0.772407	Gm35923
NC_000073.6	6729596	6729646	0.374726	Usp29
NC_000073.6	6729596	6729646	0.374726	Peg3
NC_000077.6	79590663	79590747	0.3858	Rab11fip4
NC_000086.7	73774364	73774492	0.438018	Srpk3
NC_000085.6	31764949	31765004	0.342904	Prkg1
NC_000075.6	120214479	120214544	0.388522	Gm38642
NC_000070.6	138914264	138914360	0.383481	Otud3
NC_000068.7	181212372	181212431	0.346752	BC051628
NC_000068.7	181212372	181212431	0.346752	Srms
NC_000083.6	31872011	31872062	0.39511	Gm30509
NC_000076.6	79820690	79820752	0.364181	Misp
NC_000078.6	36255597	36255670	0.423557	Lrrc72
NC_000068.7	160349610	160349661	0.463589	Gm826
NC_000077.6	115463303	115463462	0.472513	Gm11695
NC_000077.6	106374819	106375056	0.470173	Prr29
NC_000077.6	58640846	58640906	0.38878	Trim58
NC_000085.6	8664354	8664449	0.488651	Chrm1
NC_000085.6	8664354	8664449	0.488651	9830166K06Rik
NC_000086.7	101732935	101733266	0.467682	Cxcr3
NC_000069.6	86920768	86920845	0.396728	Dclk2
NC_000074.6	123597447	123597531	0.604004	n-R5s134
NC_000074.6	123597447	123597531	0.604004	Rn5s
NC_000075.6	106476147	106476199	0.417334	Rrp9
NC_000075.6	106476147	106476199	0.417334	Parp3
NC_000074.6	75094051	75094294	0.396635	Hmox1
NC_000083.6	24657919	24657969	0.354778	Npw
NC_000076.6	62193182	62193257	0.456115	Mir7662
NC_000069.6	10351600	10351691	0.454276	Zfand1
NC_000072.6	54039145	54039217	0.385933	Chn2
NC_000072.6	91845055	91845229	0.399426	Grip2
NC_000068.7	174294821	174294883	0.404299	Nespas
NC_000073.6	142296316	142296407	0.422162	Krtap5-1
NC_000072.6	48421212	48421309	0.561283	Gm38803
NC_000074.6	120227238	120227325	0.536631	Gse1
NC_000074.6	120227238	120227325	0.536631	A330074K22Rik
NC_000069.6	81933501	81933551	0.506781	Ctso
NC_000076.6	128412884	128412970	0.535713	Nabp2
NC_000086.7	38601275	38601363	0.621778	Mcts1
NC_000087.7	10535580	10535689	0.510831	Gm20737
NC_000067.6	182158667	182158735	0.583606	Vmn1r1
NC_000071.6	150673472	150673872	-0.559229	Pds5b
NC_000079.6	98316372	98316707	-0.390903	LOC105246056
NC_000079.6	98316372	98316707	-0.390903	Btf3
NC_000083.6	25434006	25434519	-0.414214	Gm33565
NC_000083.6	25434006	25434519	-0.414214	Cacna1h
NC_000081.6	72809538	72809822	-0.421066	Peg13
NC_000075.6	103111607	103111803	-0.327918	Rab6b
NC_000086.7	7375520	7375778	-0.50897	Gm14379
NC_000086.7	7375520	7375778	-0.50897	Usp27x
NC_000067.6	181211875	181211999	-0.407178	Gm38664
NC_000067.6	181211875	181211999	-0.407178	Wdr26
NC_000068.7	26389359	26389456	-0.334128	Pmpca
NC_000068.7	26389359	26389456	-0.334128	Sdccag3
NC_000074.6	105758340	105758430	-0.318113	Gfod2
NC_000080.6	52014262	52014461	-0.46061	Tmem253
NC_000068.7	162660483	162660623	-0.395464	9430021M05Rik
NC_000068.7	162660483	162660623	-0.395464	Ptprt
NC_000079.6	41220451	41220514	-0.327217	Elovl2
NC_000067.6	119648543	119648668	-0.336477	Epb41l5
NC_000075.6	111312135	111312410	-0.458984	Trank1
NC_000077.6	100759629	100759691	-0.330799	Kcnh4
NC_000067.6	177257937	177258046	-0.377099	Gm36904
NC_000067.6	177257937	177258046	-0.377099	Akt3
NC_000077.6	75795250	75795301	-0.34076	Gm12339
NC_000077.6	75795250	75795301	-0.34076	Doc2b
NC_000074.6	31008515	31008857	-0.43369	Gm32841
NC_000086.7	94542338	94542551	-0.434343	Maged1
NC_000071.6	35389402	35389461	-0.358738	Hmx1
NC_000071.6	35389402	35389461	-0.358738	E130018O15Rik
NC_000083.6	56505735	56505809	-0.375262	Gm33258
NC_000086.7	94541128	94541190	-0.405212	Maged1
NC_000068.7	174283300	174283402	-0.412157	Gnas
NC_000075.6	56995790	56995897	-0.402619	Ptpn9
NC_000086.7	36817426	36817523	-0.416378	Mdrl
NC_000084.6	88894323	88894429	-0.410222	Socs6
NC_000087.7	84563103	84563200	-0.684315	LOC108168579
NC_000073.6	28833689	28833825	-0.508782	Lgals4
NC_000075.6	115348647	115348713	-0.472003	Gm30762
NC_000087.7	70442864	70443054	-0.540741	LOC108168527
NC_000079.6	66587733	66587786	-0.515531	LOC108167371
NW_012132911.1	185365	185453	-0.599139	Gm7073
NC_000075.6	121521321	121521458	-0.500981	Gm38661
NC_000070.6	133237960	133238028	-0.477833	Map3k6
NC_000076.6	77826426	77826532	-0.588693	Krtap10-4
NC_000078.6	114513348	114513399	-0.481014	Mir7094-2
NC_000086.7	25301031	25301129	-0.547631	Gm5169

## Sheet: 7. DMR d5 vs d3 Gene Body
Differentially methylated regions (DMRs) at gene body between day5 and day 3 DDC-damaged livers from littermate controls. Genes with DMRs ≥25% are shown. Column D, Methylation/Hydroxymethylation difference, positive value means loss of 5mC or 5hmC
Chromosome	Start	End	Difference	Gene Name
NC_000073.6	16204507	16204598	-0.756072	Name=Dhx34
NC_000086.7	113537917	113538050	-0.73225	Name=Dach2
NC_000073.6	59428175	59428260	-0.704362	Name=LOC102637691
NC_000081.6	76882989	76883070	-0.696176	Name=Zfp7
NC_000087.7	84563103	84563200	-0.684315	Name=LOC108168579
NW_019168514.1	22466	22599	-0.677958	Name=Slfn5
NW_019168514.1	22466	22599	-0.677958	Name=Slfn5os
NC_000067.6	24079880	24079976	-0.669747	Name=Fam135a
NC_000073.6	145221665	145221718	-0.666047	Name=Tpcn2
NC_000086.7	92212667	92212974	-0.645186	Name=Mageb18
NC_000084.6	42248282	42248347	-0.627286	Name=Lars
NC_000086.7	56288783	56288848	-0.61029	Name=Gm35953
NT_187028.1	92036	92114	-0.595473	Name=Olfr56
NT_187028.1	92036	92114	-0.595473	Name=Gm12185
NC_000086.7	157477561	157477624	-0.589419	Name=Sms
NC_000076.6	77826426	77826532	-0.588693	Name=Krtap10-4
NC_000076.6	77826426	77826532	-0.588693	Name=Tspear
NC_000082.6	27323589	27323723	-0.586619	Name=Gm32312
NC_000082.6	27323589	27323723	-0.586619	Name=Ostn
NC_000079.6	95103387	95103468	-0.580755	Name=Pde8b
NT_187000.1	266419	266588	-0.577972	Name=Mup2
NC_000086.7	56200839	56201050	-0.576905	Name=Gm773
NC_000087.7	35118570	35118720	-0.576036	Name=LOC108168545
NT_166438.1	93630	93693	-0.575875	Name=LOC665290
NC_000076.6	8319150	8319253	-0.574633	Name=Ust
NC_000077.6	103023473	103023616	-0.571261	Name=Dcakd
NC_000067.6	158869971	158870044	-0.568885	Name=Pappa2
NC_000083.6	28812074	28812153	-0.565878	Name=LOC105246245
NC_000083.6	28812074	28812153	-0.565878	Name=Brpf3
NC_000086.7	106028630	106028930	-0.564124	Name=Atp7a
NC_000073.6	133040953	133041028	-0.56143	Name=Ctbp2
NC_000071.6	150673472	150673872	-0.559229	Name=Gm40353
NC_000071.6	150673472	150673872	-0.559229	Name=Pds5b
NC_000074.6	14313610	14313727	-0.55749	Name=Dlgap2
NC_000080.6	4947380	4947490	-0.55094	Name=Gm10410
NC_000081.6	4733963	4734029	-0.54813	Name=C6
NC_000086.7	25301031	25301129	-0.547631	Name=Gm5169
NC_000086.7	25301031	25301129	-0.547631	Name=4930557B15Rik
NC_000073.6	43474380	43474446	-0.547323	Name=Iglon5
NC_000086.7	148699836	148699971	-0.541723	Name=Gm15127
NC_000075.6	37072856	37073004	-0.540117	Name=Pknox2
NC_000073.6	97146951	97147073	-0.538159	Name=Gab2
NC_000077.6	106475100	106475460	-0.536977	Name=Ern1
NC_000076.6	85636949	85637100	-0.531365	Name=Btbd11
NC_000080.6	43827519	43827620	-0.528542	Name=Gm32427
NC_000079.6	40012608	40012799	-0.519891	Name=Ofcc1
NC_000068.7	111318312	111318451	-0.514016	Name=Olfr1280
NC_000078.6	28914498	28914618	-0.512021	Name=Gm31333
NC_000086.7	7375520	7375778	-0.50897	Name=Usp27x
NC_000073.6	28833689	28833825	-0.508782	Name=Lgals4
NC_000087.7	41248868	41248959	-0.507262	Name=Gm28597
NC_000077.6	89874287	89874355	-0.506859	Name=Gm34677
NC_000069.6	60494495	60494741	-0.506622	Name=Mbnl1
NC_000072.6	113984195	113984305	-0.503326	Name=Atp2b2
NC_000073.6	64849312	64849482	-0.49955	Name=Fam189a1
NC_000081.6	91432485	91432589	-0.493919	Name=Slc2a13
NC_000086.7	96547681	96547787	-0.489706	Name=Heph
NC_000083.6	81688823	81689056	-0.489304	Name=Slc8a1
NC_000080.6	10258262	10258353	-0.487302	Name=Fhit
NC_000071.6	118682243	118682314	-0.485043	Name=Med13l
NC_000071.6	53503107	53503255	-0.479918	Name=Rbpj
NC_000070.6	57776163	57776248	-0.475441	Name=Pakap
NC_000077.6	106032953	106033281	-0.475364	Name=Kcnh6
NC_000069.6	115080988	115081237	-0.474854	Name=Olfm3
NC_000073.6	109475698	109475788	-0.472287	Name=Trim66
NC_000075.6	115348647	115348713	-0.472003	Name=Gm30762
NC_000068.7	97169764	97169845	-0.470051	Name=Lrrc4c
NC_000080.6	103005318	103005471	-0.461767	Name=4933432I03Rik
NC_000068.7	167507969	167508080	-0.46166	Name=Rnf114
NC_000080.6	52014262	52014461	-0.46061	Name=Zfp219
NC_000070.6	125895097	125895160	-0.460473	Name=2610028E06Rik
NC_000075.6	111312135	111312410	-0.458984	Name=Trank1
NC_000072.6	128653373	128653553	-0.457963	Name=Gm34617
NC_000073.6	50549076	50549176	-0.457017	Name=Nell1os
NC_000073.6	50549076	50549176	-0.457017	Name=Nell1
NC_000086.7	100294711	100294977	-0.453647	Name=Eda
NC_000072.6	32196141	32196287	-0.449326	Name=Plxna4
NC_000071.6	135826400	135826567	-0.449238	Name=Srrm3
NC_000073.6	119558472	119558760	-0.447316	Name=Acsm2
NC_000071.6	111094133	111094307	-0.44686	Name=Ttc28
NC_000086.7	86871329	86871400	-0.443489	Name=Il1rapl1
NC_000084.6	60703229	60703377	-0.442335	Name=Ndst1
NC_000077.6	77687409	77687753	-0.440466	Name=Nufip2
NC_000084.6	31130070	31130306	-0.437921	Name=Rit2
NC_000068.7	58156174	58156261	-0.437648	Name=Cytip
NC_000075.6	58102230	58102391	-0.434906	Name=Ccdc33
NC_000075.6	58102230	58102391	-0.434906	Name=Stra6
NC_000074.6	31008515	31008857	-0.43369	Name=Gm32841
NC_000067.6	133711300	133711388	-0.422533	Name=Atp2b4
NC_000081.6	72809538	72809822	-0.421066	Name=Peg13
NC_000081.6	72809538	72809822	-0.421066	Name=Trappc9
NC_000075.6	95401842	95402100	-0.415413	Name=Chst2
NC_000083.6	25434006	25434519	-0.414214	Name=Gm33565
NC_000068.7	174283300	174283402	-0.412157	Name=Nespas
NC_000080.6	28328650	28328815	-0.411098	Name=Erc2
NC_000084.6	88894323	88894429	-0.410222	Name=Socs6
NC_000067.6	181211875	181211999	-0.407178	Name=Wdr26
NC_000067.6	181211875	181211999	-0.407178	Name=Gm38664
NC_000086.7	94541128	94541190	-0.405212	Name=Maged1
NC_000081.6	97860960	97861113	-0.40272	Name=Gm33690
NC_000081.6	97860960	97861113	-0.40272	Name=Vdr
NC_000075.6	56995790	56995897	-0.402619	Name=Ptpn9
NC_000074.6	104327426	104327495	-0.395677	Name=Cmtm2b
NC_000068.7	162660483	162660623	-0.395464	Name=Ptprt
NC_000067.6	187604661	187604968	-0.395371	Name=LOC108167753
NC_000067.6	187604661	187604968	-0.395371	Name=Gm36388
NC_000077.6	103233132	103233187	-0.394518	Name=Gm34823
NC_000077.6	103233132	103233187	-0.394518	Name=Map3k14
NC_000076.6	68225129	68225201	-0.392408	Name=Arid5b
NC_000084.6	40331837	40331911	-0.392162	Name=Kctd16
NC_000074.6	118937452	118937565	-0.392094	Name=Cdh13
NC_000067.6	124007208	124007258	-0.391894	Name=Dpp10
NC_000080.6	101511714	101511859	-0.39155	Name=Tbc1d4
NC_000079.6	98316372	98316707	-0.390903	Name=Btf3
NC_000077.6	40068998	40069077	-0.389341	Name=Gm12132
NC_000081.6	82911629	82911802	-0.386265	Name=Tcf20
NC_000070.6	46084657	46084758	-0.380146	Name=Tmod1
NC_000067.6	177257937	177258046	-0.377099	Name=Gm36904
NC_000067.6	177257937	177258046	-0.377099	Name=Akt3
NC_000074.6	117193317	117193373	-0.376298	Name=Gan
NC_000070.6	155405688	155405766	-0.376234	Name=5830444B04Rik
NC_000070.6	155405688	155405766	-0.376234	Name=Cfap74
NC_000069.6	122147556	122147634	-0.375092	Name=Abca4
NC_000085.6	7423622	7423728	-0.37465	Name=2700081O15Rik
NC_000067.6	11729167	11729366	-0.373975	Name=A830018L16Rik
NC_000077.6	85524316	85524388	-0.367329	Name=Bcas3
NC_000068.7	16250117	16250213	-0.365107	Name=Malrd1
NC_000077.6	12025997	12026301	-0.363667	Name=Grb10
NC_000073.6	68312378	68312434	-0.363576	Name=Fam169b
NC_000077.6	79791619	79791771	-0.359237	Name=LOC105242790
NC_000071.6	35389402	35389461	-0.358738	Name=Hmx1
NC_000079.6	109049092	109049184	-0.355313	Name=Pde4d
NC_000079.6	109049298	109049383	-0.354614	Name=Pde4d
NC_000077.6	75795250	75795301	-0.34076	Name=Doc2b
NC_000075.6	121127904	121128250	-0.337411	Name=Ulk4
NC_000067.6	119648543	119648668	-0.336477	Name=Epb41l5
NC_000067.6	133074493	133074631	-0.335585	Name=Pik3c2b
NC_000068.7	26389359	26389456	-0.334128	Name=Pmpca
NC_000077.6	100759629	100759691	-0.330799	Name=Kcnh4
NC_000079.6	36853456	36853543	-0.328917	Name=Gm30489
NC_000075.6	103111607	103111803	-0.327918	Name=LOC108167679
NC_000086.7	169986861	169987041	-0.323535	Name=Mid1
NC_000073.6	99468946	99469015	-0.321899	Name=Klhl35
NC_000074.6	105758340	105758430	-0.318113	Name=Gfod2
NC_000068.7	162485514	162485858	-0.317502	Name=Ptprt
NC_000078.6	77238661	77238771	0.302904	Name=Fut8
NC_000086.7	107678718	107679168	0.305507	Name=Tbx22
NC_000072.6	47594745	47595022	0.309024	Name=Ezh2
NC_000073.6	120917708	120917774	0.30957	Name=Polr3e
NC_000073.6	19562032	19562107	0.312304	Name=Ppp1r37
NC_000070.6	117304475	117304568	0.312854	Name=LOC102637763
NC_000070.6	117304475	117304568	0.312854	Name=Rnf220
NC_000082.6	37384913	37384984	0.312997	Name=Stxbp5l
NC_000085.6	29648113	29648167	0.313252	Name=Ermp1
NC_000073.6	90443627	90443682	0.314007	Name=Crebzf
NC_000077.6	68901529	68901623	0.314017	Name=Rpl26
NC_000074.6	120229326	120229449	0.315016	Name=Gse1
NC_000071.6	124861852	124862207	0.315631	Name=Ccdc92
NC_000068.7	165595051	165595209	0.315929	Name=Eya2
NC_000075.6	87730292	87730367	0.316801	Name=Tbx18
NC_000076.6	121586589	121586742	0.317047	Name=Tbk1
NC_000079.6	112652085	112652141	0.317298	Name=Ddx4
NC_000084.6	12974163	12974234	0.318307	Name=Impact
NC_000068.7	11777364	11777687	0.318503	Name=Fbxo18
NC_000081.6	80133199	80133291	0.318703	Name=Gm31253
NC_000081.6	80133199	80133291	0.318703	Name=Tab1
NC_000085.6	55099418	55099479	0.319204	Name=Gpam
NC_000072.6	28261044	28261105	0.319449	Name=Zfp800
NC_000070.6	133212348	133212434	0.319499	Name=Gpr3
NC_000067.6	85793743	85793885	0.319514	Name=Cab39
NC_000068.7	131041187	131041261	0.319518	Name=Gfra4
NC_000075.6	15709933	15710018	0.320271	Name=Slc36a4
NC_000075.6	95845165	95845215	0.320317	Name=Pls1
NC_000074.6	86884779	86885022	0.321995	Name=N4bp1
NC_000083.6	64331437	64331711	0.322058	Name=Pja2
NC_000077.6	78165241	78165469	0.322116	Name=Traf4
NC_000083.6	25861289	25861383	0.322837	Name=Wdr90
NC_000074.6	84800064	84800126	0.322951	Name=Nfix
NC_000071.6	22344640	22344714	0.322985	Name=Reln
NC_000083.6	50190449	50190529	0.323495	Name=Rftn1
NC_000081.6	38299222	38299275	0.323738	Name=Klf10
NC_000081.6	38299222	38299275	0.323738	Name=Gm35248
NC_000076.6	85387964	85388169	0.324465	Name=Btbd11
NC_000076.6	40349562	40349637	0.325013	Name=Cdk19
NC_000071.6	142960905	142961160	0.325366	Name=Fscn1
NC_000083.6	5841744	5841887	0.325463	Name=Snx9
NC_000070.6	141301279	141301494	0.325802	Name=Epha2
NC_000078.6	84996497	84996619	0.325861	Name=Ylpm1
NC_000075.6	50617232	50617286	0.325899	Name=AU019823
NC_000075.6	113707956	113708285	0.326275	Name=Pdcd6ip
NC_000077.6	71750953	71751072	0.326333	Name=Wscd1
NC_000081.6	101224423	101224515	0.327128	Name=A330009N23Rik
NC_000081.6	101224423	101224515	0.327128	Name=Grasp
NC_000068.7	91526952	91527146	0.327247	Name=Ckap5
NC_000070.6	155992175	155992242	0.327825	Name=B3galt6
NC_000074.6	36249228	36249338	0.327909	Name=Lonrf1
NC_000074.6	36249228	36249338	0.327909	Name=Gm35712
NC_000068.7	180641971	180642051	0.328035	Name=Tcfl5
NC_000071.6	71657756	71658132	0.328126	Name=Gabra4
NC_000071.6	71657756	71658132	0.328126	Name=Gabrb1
NC_000083.6	26948615	26948745	0.328647	Name=Syngap1
NC_000084.6	21001546	21001735	0.32912	Name=Rnf138
NC_000080.6	25459073	25459240	0.329157	Name=Zmiz1os1
NC_000080.6	25459073	25459240	0.329157	Name=Zmiz1
NC_000071.6	103753973	103754194	0.329215	Name=Aff1
NC_000069.6	37640234	37640400	0.329924	Name=Spry1
NC_000079.6	107888530	107888767	0.330196	Name=Zswim6
NC_000069.6	152346470	152346735	0.330283	Name=Usp33
NC_000072.6	116673570	116673669	0.330429	Name=Rassf4
NC_000079.6	46669784	46669855	0.330687	Name=Fam8a1
NC_000075.6	7764145	7764348	0.331055	Name=Tmem123
NC_000078.6	101082924	101083161	0.331687	Name=D130020L05Rik
NC_000078.6	101082924	101083161	0.331687	Name=Smek1
NC_000068.7	174298821	174298948	0.331835	Name=Gnas
NC_000078.6	80758217	80758285	0.33297	Name=Ccdc177
NC_000071.6	146385235	146385414	0.333047	Name=Wasf3
NC_000072.6	102564520	102564577	0.333217	Name=Cntn3
NC_000077.6	114675485	114675586	0.333259	Name=Ttyh2
NC_000072.6	124857461	124857614	0.333951	Name=P3h3
NC_000079.6	54738318	54738402	0.334238	Name=Gprin1
NC_000070.6	48473097	48473240	0.334449	Name=Tex10
NC_000068.7	32741474	32741875	0.334888	Name=Sh2d3c
NC_000082.6	97851323	97851458	0.335076	Name=Prdm15
NC_000070.6	134343093	134343216	0.335131	Name=Slc30a2
NC_000072.6	114131198	114131412	0.335179	Name=Slc6a11
NC_000068.7	137116253	137116361	0.335231	Name=Jag1
NC_000073.6	79148876	79149128	0.335392	Name=Mfge8
NC_000071.6	64230880	64230978	0.33565	Name=Tbc1d1
NC_000085.6	23687466	23687557	0.335671	Name=Ptar1
NC_000084.6	80151175	80151433	0.335731	Name=Adnp2
NC_000074.6	15028581	15028747	0.335848	Name=Kbtbd11
NC_000071.6	143288108	143288158	0.335942	Name=Zfp853
NC_000076.6	62980257	62980402	0.336027	Name=Rufy2
NC_000085.6	9982570	9982788	0.336091	Name=Fth1
NC_000078.6	20920976	20921192	0.336758	Name=Gm6626
NC_000072.6	6256729	6256781	0.336847	Name=Gm20619
NC_000074.6	24948798	24948906	0.336912	Name=Adam32
NC_000081.6	76294299	76294420	0.336941	Name=Smpd5
NC_000078.6	84996714	84996818	0.337079	Name=Ylpm1
NC_000073.6	111082431	111082516	0.337265	Name=Eif4g2
NC_000070.6	150372080	150372133	0.337314	Name=Rere
NC_000073.6	70280963	70281107	0.337319	Name=Gm29683
NC_000068.7	31887290	31887543	0.337923	Name=Lamc3
NC_000083.6	29888192	29888336	0.337941	Name=Mdga1
NC_000071.6	92392257	92392514	0.33809	Name=Art3
NC_000070.6	124658797	124658909	0.338315	Name=Pou3f1
NC_000084.6	84085450	84085536	0.338573	Name=Tshz1
NC_000075.6	120303849	120304172	0.338849	Name=Myrip
NC_000081.6	82963273	82963390	0.3393	Name=Tcf20
NC_000078.6	69892918	69893193	0.339545	Name=Atl1
NC_000078.6	69892918	69893193	0.339545	Name=Map4k5
NC_000072.6	59208714	59209078	0.339674	Name=Tigd2
NC_000069.6	66981223	66981436	0.339677	Name=Shox2
NC_000069.6	66981223	66981436	0.339677	Name=Rsrc1
NC_000071.6	119671398	119671523	0.340032	Name=Tbx3
NC_000073.6	45628419	45628535	0.340717	Name=Rasip1
NC_000068.7	151009283	151009361	0.340949	Name=Ninl
NC_000072.6	148945752	148946007	0.341107	Name=Fam60a
NC_000072.6	148945752	148946007	0.341107	Name=3010003L21Rik
NC_000078.6	112588611	112588849	0.341319	Name=Inf2
NC_000074.6	124896449	124896501	0.341326	Name=Exoc8
NC_000077.6	23307023	23307082	0.341455	Name=Usp34
NC_000075.6	107547072	107547126	0.341459	Name=Zmynd10
NC_000083.6	79020510	79020605	0.341808	Name=Prkd3
NC_000085.6	34878560	34878683	0.342369	Name=Pank1
NC_000072.6	85193914	85194166	0.342631	Name=Emx1
NC_000085.6	31764949	31765004	0.342904	Name=Prkg1
NC_000076.6	128747760	128747878	0.342964	Name=Dgka
NC_000078.6	112829371	112829550	0.343131	Name=Cdca4
NC_000068.7	131142845	131142916	0.343202	Name=Hspa12b
NC_000067.6	119837509	119837720	0.343618	Name=Ptpn4
NC_000073.6	51879290	51879377	0.343986	Name=Gas2
NC_000068.7	25877886	25878158	0.344182	Name=Kcnt1
NC_000082.6	5049485	5049698	0.344441	Name=Glyr1
NC_000082.6	38742128	38742492	0.344456	Name=B4galt4
NC_000075.6	59578486	59578576	0.34452	Name=Celf6
NC_000068.7	31887596	31887661	0.344939	Name=Lamc3
NC_000074.6	123653964	123654080	0.34533	Name=Rhou
NC_000068.7	25318567	25318939	0.345344	Name=Grin1
NC_000076.6	85102319	85102404	0.345351	Name=Fhl4
NC_000070.6	141041639	141041804	0.346086	Name=Crocc
NC_000073.6	45240727	45240865	0.346131	Name=Slc6a16
NC_000086.7	53056748	53056816	0.346652	Name=C430049B03Rik
NC_000068.7	30171414	30171515	0.346675	Name=Endog
NC_000068.7	181212372	181212431	0.346752	Name=Srms
NC_000067.6	72824447	72824563	0.346932	Name=Igfbp2
NC_000086.7	53056870	53057203	0.34726	Name=C430049B03Rik
NC_000079.6	92354745	92354847	0.34764	Name=Dhfr
NC_000079.6	92354745	92354847	0.34764	Name=Msh3
NC_000071.6	101765405	101765518	0.347665	Name=Cds1
NC_000081.6	76457352	76457870	0.347735	Name=Scx
NC_000081.6	76457352	76457870	0.347735	Name=Bop1
NC_000076.6	70599487	70599807	0.347769	Name=LOC108167819
NC_000073.6	4793307	4793484	0.34801	Name=Rpl28
NC_000084.6	75448360	75448431	0.348703	Name=Ctif
NC_000075.6	86464516	86464608	0.348964	Name=Ube2cbp
NC_000068.7	71787234	71787384	0.349083	Name=Itga6
NC_000085.6	25236666	25236950	0.349185	Name=Kank1
NC_000083.6	68837127	68837178	0.349265	Name=Gm38593
NC_000083.6	68837127	68837178	0.349265	Name=Tmem200c
NC_000075.6	112235354	112235453	0.349366	Name=2900079G21Rik
NC_000075.6	112235354	112235453	0.349366	Name=Arpp21
NC_000069.6	146684897	146684950	0.349419	Name=4930503B20Rik
NC_000080.6	20734107	20734259	0.349484	Name=Ndst2
NC_000075.6	27030965	27031037	0.34966	Name=Ncapd3
NC_000082.6	97922154	97922436	0.349669	Name=C2cd2
NC_000076.6	100143915	100144048	0.350043	Name=Gm35533
NC_000067.6	184727619	184727785	0.35026	Name=Hlx
NC_000082.6	30068651	30068812	0.350319	Name=Gm32998
NC_000071.6	64230773	64230824	0.350494	Name=Tbc1d1
NC_000085.6	3719515	3719617	0.350655	Name=Gm36787
NC_000077.6	54787592	54787677	0.351077	Name=Cdc42se2
NC_000073.6	143460600	143460795	0.351084	Name=Cdkn1c
NC_000068.7	130362412	130362490	0.351161	Name=Ebf4
NC_000076.6	128695911	128696066	0.351218	Name=Rab5b
NC_000077.6	72051017	72051284	0.351274	Name=Pitpnm3
NC_000085.6	34844175	34844225	0.351342	Name=Pank1
NC_000072.6	144781487	144781963	0.351603	Name=Sox5
NC_000084.6	60774550	60774775	0.35163	Name=Rps14
NC_000081.6	7810385	7810442	0.351648	Name=Gdnf
NC_000076.6	81363616	81363672	0.35212	Name=Mfsd12
NC_000068.7	131041336	131041548	0.352386	Name=Gfra4
NC_000071.6	124095616	124095819	0.353288	Name=Abcb9
NC_000075.6	70012466	70012846	0.353392	Name=Gtf2a2
NC_000073.6	19495235	19495295	0.353409	Name=Exoc3l2
NC_000071.6	104439307	104439482	0.353434	Name=Spp1
NC_000085.6	48232026	48232192	0.353804	Name=Sorcs3
NC_000075.6	50857082	50857386	0.353893	Name=Ppp2r1b
NC_000075.6	67760459	67760522	0.3539	Name=C2cd4b
NC_000067.6	74368426	74368592	0.353978	Name=Catip
NC_000077.6	5707681	5707864	0.354046	Name=Mrps24
NC_000072.6	48048238	48048310	0.354507	Name=Zfp777
NC_000078.6	18610311	18610532	0.354564	Name=Gm40848
NC_000067.6	167803260	167803310	0.354712	Name=Lmx1a
NC_000080.6	64652672	64652836	0.354721	Name=Kif13b
NC_000083.6	24657919	24657969	0.354778	Name=Npw
NC_000073.6	137314696	137314747	0.354842	Name=Ebf3
NC_000084.6	64661082	64661338	0.354892	Name=Atp8b1
NC_000073.6	126502944	126503326	0.355092	Name=Atxn2l
NC_000073.6	126502944	126503326	0.355092	Name=LOC105243053
NC_000070.6	130047845	130047943	0.355413	Name=Col16a1
NC_000070.6	130047845	130047943	0.355413	Name=Gm12963
NC_000068.7	52072776	52073062	0.355692	Name=Rif1
NC_000077.6	64520725	64520954	0.355727	Name=Hs3st3a1
NC_000068.7	35109403	35109854	0.356636	Name=Cntrl
NC_000067.6	162477893	162478257	0.356679	Name=Gm31985
NC_000067.6	162477893	162478257	0.356679	Name=Dnm3
NC_000073.6	40899548	40899646	0.356888	Name=Vstm2b
NC_000078.6	99964338	99964582	0.357257	Name=Kcnk13
NC_000084.6	84729809	84729875	0.357262	Name=Fam69c
NC_000067.6	52597953	52598249	0.357414	Name=Tmem194b
NC_000068.7	20899824	20899957	0.357866	Name=Arhgap21
NC_000085.6	53600748	53600995	0.358159	Name=Smc3
NC_000077.6	119549309	119549725	0.358499	Name=Gm11762
NC_000068.7	67565711	67566033	0.358689	Name=B3galt1
NC_000074.6	95142257	95142636	0.359339	Name=Gm31036
NC_000074.6	95142257	95142636	0.359339	Name=Kifc3
NC_000073.6	123124180	123124284	0.359483	Name=Tnrc6a
NC_000085.6	41652073	41652164	0.359509	Name=Slit1
NC_000079.6	48262042	48262171	0.359598	Name=Id4
NC_000079.6	48262042	48262171	0.359598	Name=A330033J07Rik
NC_000078.6	72761345	72761543	0.359898	Name=Ppm1a
NC_000067.6	7089015	7089290	0.359982	Name=Pcmtd1
NC_000084.6	38600647	38600703	0.360367	Name=Spry4
NC_000084.6	31939421	31939563	0.360399	Name=Lims2
NC_000069.6	129788945	129789037	0.360744	Name=Lrit3
NC_000071.6	53998852	53999068	0.360876	Name=Stim2
NC_000076.6	119454284	119454405	0.361319	Name=Grip1
NC_000077.6	108331069	108331120	0.361707	Name=Prkca
NC_000068.7	125123246	125123572	0.361777	Name=Myef2
NC_000067.6	161876432	161876533	0.361805	Name=Suco
NC_000067.6	92832019	92832127	0.362382	Name=Gpc1
NC_000069.6	103279604	103279900	0.362391	Name=Trim33
NC_000074.6	84687441	84687549	0.362514	Name=Trmt1
NC_000074.6	84687441	84687549	0.362514	Name=Nacc1
NC_000068.7	18800325	18800434	0.362617	Name=Carlr
NC_000077.6	79590968	79591121	0.362796	Name=Rab11fip4
NC_000068.7	178414059	178414309	0.362866	Name=Ppp1r3d
NC_000073.6	128687970	128688233	0.363065	Name=Inpp5f
NC_000067.6	130715771	130715864	0.363164	Name=Pfkfb2
NC_000072.6	29179431	29179506	0.363249	Name=Prrt4
NC_000077.6	33203315	33203576	0.363393	Name=Tlx3
NC_000079.6	105293836	105294026	0.363467	Name=Rnf180
NC_000075.6	120010944	120011343	0.363482	Name=Gm33800
NC_000067.6	86018165	86018390	0.363517	Name=Spata3
NC_000074.6	66456076	66456277	0.363583	Name=March1
NC_000085.6	46056488	46056888	0.363651	Name=Pprc1
NC_000077.6	96138995	96139068	0.364011	Name=Gm30084
NC_000077.6	96138995	96139068	0.364011	Name=Ttll6
NC_000079.6	75943587	75943842	0.364018	Name=Rhobtb3
NC_000076.6	79820690	79820752	0.364181	Name=Palm
NC_000067.6	133046583	133046708	0.364345	Name=Pik3c2b
NC_000067.6	133046583	133046708	0.364345	Name=Gm28609
NC_000084.6	31910711	31910924	0.364525	Name=Sft2d3
NC_000068.7	27677500	27677566	0.364633	Name=Rxra
NC_000074.6	91799549	91799623	0.364651	Name=Irx3
NC_000071.6	67427148	67427439	0.364714	Name=Bend4
NC_000083.6	87636528	87636593	0.364744	Name=Epcam
NC_000070.6	155222573	155222709	0.364749	Name=Ski
NC_000069.6	58576884	58577236	0.365093	Name=Selt
NC_000077.6	97766181	97766455	0.365316	Name=Cwc25
NC_000083.6	12318501	12318779	0.365866	Name=Map3k4
NC_000073.6	60004711	60004870	0.365892	Name=Snurf
NC_000073.6	60004711	60004870	0.365892	Name=Snrpn
NC_000075.6	23222964	23223480	0.366241	Name=Bmper
NC_000074.6	47392429	47392640	0.366382	Name=Stox2
NC_000070.6	120746813	120747136	0.366816	Name=Kcnq4
NC_000077.6	21091515	21091614	0.366879	Name=Gm40824
NC_000077.6	21091515	21091614	0.366879	Name=Peli1
NC_000071.6	139957281	139957439	0.367155	Name=Elfn1
NC_000074.6	47989839	47990261	0.367985	Name=Wwc2
NC_000082.6	94328528	94328700	0.368129	Name=Ripply3
NC_000070.6	133085102	133085484	0.368475	Name=Gm26615
NC_000081.6	99224629	99224725	0.368477	Name=Kcnh3
NC_000081.6	99224629	99224725	0.368477	Name=LOC108168265
NC_000071.6	24348641	24348803	0.369243	Name=Kcnh2
NC_000072.6	29718112	29718217	0.369259	Name=Tspan33
NC_000076.6	59547791	59547864	0.369268	Name=Mcu
NC_000070.6	59805915	59806064	0.369427	Name=Snx30
NC_000070.6	100096318	100096426	0.369818	Name=Ror1
NC_000068.7	84715034	84715219	0.37004	Name=Gm32289
NC_000068.7	84715034	84715219	0.37004	Name=Zdhhc5
NC_000077.6	120530446	120530509	0.370191	Name=Gcgr
NC_000081.6	8444258	8444462	0.370372	Name=LOC102634078
NC_000081.6	8444258	8444462	0.370372	Name=Nipbl
NC_000079.6	107022332	107022777	0.370646	Name=3830408C21Rik
NC_000083.6	46628761	46629056	0.37074	Name=Ptk7
NC_000068.7	38712358	38712417	0.371006	Name=Nr5a1
NC_000077.6	6007519	6007660	0.371269	Name=Gm40812
NC_000077.6	6007519	6007660	0.371269	Name=Camk2b
NC_000081.6	96698794	96699048	0.371659	Name=Slc38a2
NC_000067.6	165459895	165460156	0.371999	Name=Dcaf6
NC_000077.6	25645313	25645619	0.372667	Name=5730522E02Rik
NC_000074.6	83973092	83973156	0.372724	Name=Prkaca
NC_000069.6	123447227	123447589	0.372897	Name=Gm35065
NC_000069.6	123447227	123447589	0.372897	Name=Prss12
NC_000078.6	84875602	84875852	0.372924	Name=D030025P21Rik
NC_000078.6	84875602	84875852	0.372924	Name=Ltbp2
NC_000079.6	34916729	34917079	0.372945	Name=Fam217a
NC_000079.6	34916729	34917079	0.372945	Name=4933417A18Rik
NC_000079.6	96132429	96132510	0.373029	Name=Sv2c
NC_000070.6	57956376	57956533	0.373095	Name=Txn1
NC_000070.6	57956376	57956533	0.373095	Name=Gm35344
NC_000071.6	8622389	8622797	0.373118	Name=Rundc3b
NC_000071.6	8622389	8622797	0.373118	Name=Abcb1a
NC_000074.6	9977666	9977733	0.373237	Name=Lig4
NC_000074.6	9977666	9977733	0.373237	Name=Abhd13
NC_000079.6	46501783	46502144	0.373239	Name=Cap2
NC_000081.6	73724566	73724818	0.373325	Name=Ptp4a3
NC_000079.6	97493389	97493649	0.373437	Name=Lncenc1
NC_000072.6	53563585	53563802	0.373549	Name=Creb5
NC_000068.7	71728944	71729004	0.373654	Name=Platr26
NC_000081.6	102921775	102921890	0.373695	Name=Hoxc13
NC_000072.6	4747760	4748075	0.373823	Name=Peg10
NC_000070.6	72139740	72139793	0.374004	Name=Tle1
NC_000071.6	115907541	115907646	0.374105	Name=Cit
NC_000068.7	31310851	31310907	0.37438	Name=Gm32866
NC_000085.6	47343396	47343794	0.374581	Name=Sh3pxd2a
NC_000073.6	18992133	18992299	0.374587	Name=Mypop
NC_000073.6	6729596	6729646	0.374726	Name=Peg3
NC_000077.6	6526929	6527058	0.374831	Name=Snhg15
NC_000068.7	65132047	65132116	0.374862	Name=Cobll1
NC_000073.6	4776841	4777059	0.375016	Name=Il11
NC_000071.6	128739500	128739606	0.375179	Name=Piwil1
NC_000074.6	47674613	47674840	0.375183	Name=Ing2
NC_000079.6	17804952	17805069	0.375695	Name=Cdk13
NC_000067.6	133877123	133877195	0.37653	Name=Gm31515
NC_000069.6	92024439	92024894	0.376536	Name=Pglyrp3
NC_000075.6	96544181	96544338	0.376546	Name=LOC108167675
NC_000075.6	96544181	96544338	0.376546	Name=Rasa2
NC_000075.6	55546558	55546718	0.376756	Name=Isl2
NC_000074.6	84785603	84785705	0.37679	Name=Nfix
NC_000079.6	9094281	9094488	0.376829	Name=Larp4b
NC_000070.6	154528629	154528956	0.376859	Name=Prdm16
NC_000070.6	154528629	154528956	0.376859	Name=Gm13133
NC_000073.6	144582178	144582342	0.377444	Name=Fadd
NC_000075.6	37384548	37384945	0.377731	Name=Hepacam
NC_000076.6	53597351	53597562	0.37779	Name=Gm3902
NC_000076.6	53597351	53597562	0.37779	Name=Mcm9
NC_000076.6	53597351	53597562	0.37779	Name=Asf1a
NC_000068.7	174286975	174287322	0.378091	Name=Nespas
NC_000068.7	174286975	174287322	0.378091	Name=Gnas
NC_000077.6	98358389	98358610	0.378317	Name=Stard3
NC_000073.6	35119178	35119675	0.378665	Name=Cebpa
NC_000077.6	61147320	61147750	0.379186	Name=Tnfrsf13b
NC_000069.6	87950369	87950452	0.37944	Name=Crabp2
NC_000074.6	105893610	105893679	0.379526	Name=Nrn1l
NC_000085.6	21628347	21628586	0.379831	Name=1110059E24Rik
NC_000068.7	172345482	172345584	0.379895	Name=Fam210b
NC_000082.6	38484023	38484474	0.380149	Name=Cd80
NC_000071.6	128739678	128739790	0.380259	Name=Piwil1
NC_000075.6	72532141	72532357	0.381226	Name=Rfx7
NC_000080.6	73143942	73144194	0.381669	Name=Rcbtb2
NC_000080.6	4856003	4856060	0.381768	Name=Gm3264
NC_000080.6	4856003	4856060	0.381768	Name=Gm26650
NC_000080.6	28777934	28777984	0.382313	Name=Gm35217
NC_000077.6	74466149	74466275	0.382527	Name=Rap1gap2
NC_000070.6	56850792	56850911	0.383543	Name=Ctnnal1
NC_000079.6	74062278	74062528	0.383709	Name=Cep72
NC_000073.6	16273137	16273293	0.383737	Name=Inafm1
NC_000068.7	158770523	158770610	0.384392	Name=Fam83d
NC_000078.6	103313952	103314164	0.384776	Name=Fam181a
NC_000078.6	103313952	103314164	0.384776	Name=Gm29508
NC_000068.7	18997991	18998205	0.385155	Name=Pip4k2a
NC_000074.6	48843407	48843486	0.38519	Name=Tenm3
NC_000067.6	170215088	170215476	0.385191	Name=Uhmk1
NC_000070.6	48046840	48047006	0.385206	Name=Nr4a3
NC_000068.7	69544022	69544138	0.385242	Name=Lrp2
NC_000077.6	120721323	120721783	0.385621	Name=Rac3
NC_000069.6	53041638	53041990	0.38566	Name=Lhfp
NC_000074.6	124897073	124897334	0.385747	Name=Exoc8
NC_000071.6	121423395	121423650	0.385968	Name=Naa25
NC_000073.6	4789341	4789474	0.386561	Name=Tmem238
NC_000077.6	98470229	98470299	0.38671	Name=Ikzf3
NC_000078.6	24651343	24651679	0.386926	Name=Klf11
NC_000068.7	130295905	130296187	0.386933	Name=Ebf4
NC_000076.6	39732308	39732658	0.387118	Name=Rev3l
NC_000081.6	5276535	5276610	0.387451	Name=Gm41257
NC_000077.6	100673322	100673498	0.387843	Name=Dhx58os
NC_000077.6	100673322	100673498	0.387843	Name=Zfp385c
NC_000077.6	58640846	58640906	0.38878	Name=Trim58
NC_000071.6	24551073	24551130	0.388822	Name=4931409K22Rik
NC_000085.6	40723664	40723753	0.389119	Name=Entpd1
NC_000075.6	119972704	119972801	0.389693	Name=Csrnp1
NC_000068.7	162931976	162932046	0.389861	Name=Srsf6
NC_000071.6	24388429	24388533	0.390505	Name=Atg9b
NC_000082.6	38376670	38376937	0.390509	Name=Popdc2
NC_000069.6	52269062	52269372	0.391072	Name=Foxo1
NC_000068.7	76980140	76980379	0.39241	Name=Ttn
NC_000071.6	122383436	122383559	0.392442	Name=Gm32853
NC_000077.6	66409186	66409245	0.392729	Name=LOC102633054
NC_000077.6	66409186	66409245	0.392729	Name=Shisa6
NC_000077.6	77983426	77983552	0.392833	Name=Phf12
NC_000074.6	87958685	87959088	0.392853	Name=Zfp423
NC_000075.6	55149759	55150177	0.393205	Name=Ube2q2
NC_000067.6	74368035	74368218	0.393817	Name=Catip
NC_000075.6	108388419	108388570	0.394778	Name=Usp4
NC_000070.6	150371751	150371997	0.395192	Name=Rere
NC_000080.6	93216027	93216331	0.395396	Name=Pcdh9
NC_000076.6	5550566	5550811	0.395461	Name=Syne1
NC_000068.7	130580567	130580905	0.395478	Name=Avp
NC_000083.6	25570061	25570267	0.395514	Name=Sox8
NC_000074.6	106936020	106936376	0.395536	Name=Sntb2
NC_000079.6	67863779	67863849	0.395578	Name=BC048507
NC_000074.6	75094051	75094294	0.396635	Name=Hmox1
NC_000069.6	86920768	86920845	0.396728	Name=Dclk2
NC_000068.7	27269324	27269380	0.397953	Name=Vav2
NC_000075.6	107547210	107547560	0.398047	Name=Zmynd10
NC_000073.6	67372657	67373095	0.398062	Name=Mef2a
NC_000078.6	32060803	32061199	0.398616	Name=Prkar2b
NC_000085.6	6979757	6979911	0.39899	Name=Fkbp2
NC_000076.6	58499089	58499175	0.39915	Name=Ccdc138
NC_000082.6	8667539	8667589	0.399206	Name=Carhsp1
NC_000083.6	87611396	87611467	0.399411	Name=LOC108168359
NC_000071.6	62766109	62766574	0.399423	Name=Arap2
NC_000085.6	10304494	10304635	0.399829	Name=Dagla
NC_000068.7	132577511	132577738	0.400207	Name=Gpcpd1
NC_000078.6	112125850	112126291	0.40035	Name=Aspg
NC_000079.6	119400309	119400528	0.400463	Name=Nnt
NC_000068.7	49655623	49655806	0.400616	Name=Kif5c
NC_000074.6	33516954	33517153	0.40094	Name=Tex15
NC_000080.6	25607532	25607707	0.401134	Name=Zmiz1
NC_000072.6	148354616	148354824	0.401381	Name=Tmtc1
NC_000075.6	32467057	32467152	0.401395	Name=Fli1
NC_000086.7	136626750	136626825	0.401651	Name=Tceal3
NC_000075.6	31030437	31030794	0.402126	Name=Gm29724
NC_000075.6	31030437	31030794	0.402126	Name=Zbtb44
NC_000086.7	16817168	16817511	0.402131	Name=Maob
NC_000077.6	75937299	75937499	0.402265	Name=Rph3al
NC_000068.7	120730973	120731099	0.402439	Name=Cdan1
NC_000077.6	5261055	5261441	0.402472	Name=LOC108167881
NC_000077.6	5261055	5261441	0.402472	Name=Kremen1
NC_000080.6	46882807	46883227	0.403027	Name=Samd4
NC_000084.6	35977603	35977661	0.403098	Name=Psd2
NC_000067.6	83407594	83407697	0.404225	Name=Sphkap
NC_000068.7	174294821	174294883	0.404299	Name=Nespas
NC_000068.7	174294821	174294883	0.404299	Name=Gnas
NC_000073.6	100227452	100227898	0.404303	Name=Pgm2l1
NC_000067.6	75506245	75506544	0.404908	Name=Obsl1
NC_000082.6	84835430	84835800	0.405218	Name=Atp5j
NC_000082.6	84835430	84835800	0.405218	Name=Gabpa
NC_000073.6	137286293	137286386	0.405571	Name=Ebf3
NC_000070.6	137212057	137212134	0.40601	Name=Gm31820
NC_000073.6	16815951	16816481	0.40601	Name=Fkrp
NC_000073.6	16815951	16816481	0.40601	Name=Strn4
NC_000086.7	36795619	36795702	0.406098	Name=Slc25a5
NC_000074.6	31111862	31112018	0.40632	Name=Rnf122
NC_000079.6	42052480	42052794	0.406764	Name=Hivep1
NC_000067.6	60098347	60098816	0.407468	Name=Wdr12
NC_000067.6	60098347	60098816	0.407468	Name=Carf
NC_000077.6	3290291	3290473	0.407659	Name=Patz1
NC_000075.6	107699466	107699597	0.407726	Name=Sema3f
NT_166299.2	852409	852683	0.408424	Name=2610036A22Rik
NT_166299.2	852409	852683	0.408424	Name=LOC100862460
NT_166299.2	852409	852683	0.408424	Name=2610305D13Rik
NC_000068.7	25272479	25272686	0.408724	Name=Anapc2
NC_000083.6	30626830	30626884	0.40921	Name=1700097N02Rik
NC_000075.6	44713265	44713459	0.409838	Name=Phldb1
NC_000073.6	143107180	143107479	0.409921	Name=Kcnq1
NC_000067.6	52366658	52366750	0.410247	Name=Gm31955
NC_000082.6	85215511	85215647	0.410651	Name=Gm41482
NC_000074.6	79399044	79399543	0.411348	Name=Smad1
NC_000074.6	79399044	79399543	0.411348	Name=Gm30389
NC_000077.6	4947652	4947983	0.411399	Name=Nefh
NC_000077.6	4947652	4947983	0.411399	Name=Ap1b1
NC_000081.6	82963960	82964114	0.412098	Name=Tcf20
NC_000081.6	79804379	79804846	0.412781	Name=Nptxr
NC_000081.6	79804379	79804846	0.412781	Name=Npcd
NC_000071.6	106695921	106696000	0.412827	Name=Zfp644
NC_000068.7	93180144	93180282	0.412954	Name=Gm32683
NC_000070.6	129820277	129820690	0.41315	Name=Ptp4a2
NC_000068.7	13793294	13793743	0.413453	Name=St8sia6
NC_000072.6	17772669	17772722	0.413606	Name=St7
NC_000072.6	122339322	122339551	0.414005	Name=Phc1
NC_000077.6	120011898	120012305	0.41407	Name=Aatk
NC_000070.6	100527484	100527866	0.414706	Name=Ube2uos
NC_000070.6	100527484	100527866	0.414706	Name=Ube2u
NC_000073.6	38567968	38568070	0.414958	Name=Gm4454
NC_000068.7	174327806	174328044	0.414978	Name=Gnas
NC_000078.6	112679207	112679779	0.415208	Name=Zbtb42
NC_000070.6	46684292	46684380	0.415479	Name=Gabbr2
NC_000077.6	97343680	97343868	0.41562	Name=Gpr179
NC_000082.6	38305114	38305228	0.416032	Name=Maats1
NC_000070.6	148820076	148820310	0.416889	Name=Casz1
NC_000071.6	124187085	124187333	0.417045	Name=Pitpnm2
NC_000075.6	106476147	106476199	0.417334	Name=Parp3
NC_000079.6	91461545	91461597	0.417741	Name=Ssbp2
NC_000083.6	45805787	45806187	0.417883	Name=LOC108168357
NC_000071.6	114443727	114444055	0.418318	Name=Mmab
NC_000068.7	80315462	80315803	0.419022	Name=Dnajc10
NC_000083.6	84027929	84028139	0.419083	Name=Gm35551
NC_000075.6	60712916	60713457	0.419383	Name=Larp6
NC_000067.6	38627698	38628193	0.419632	Name=Aff3
NC_000069.6	67463758	67463923	0.420059	Name=Lxn
NC_000069.6	67463758	67463923	0.420059	Name=Gfm1
NC_000082.6	38902193	38902648	0.42063	Name=Igsf11
NC_000080.6	52254403	52254483	0.420689	Name=Chd8
NC_000080.6	41264553	41264919	0.420689	Name=Gm2832
NC_000078.6	23427052	23427123	0.420769	Name=Gm40862
NC_000073.6	142296316	142296407	0.422162	Name=Krtap5-1
NC_000080.6	61601400	61601682	0.422251	Name=Trim13
NC_000083.6	47888165	47888269	0.422359	Name=Foxp4
NC_000074.6	33805763	33805858	0.422703	Name=Rbpms
NC_000083.6	6742314	6742468	0.423116	Name=Ezr
NC_000078.6	111485513	111485964	0.423414	Name=Gm266
NC_000078.6	36255597	36255670	0.423557	Name=Lrrc72
NC_000076.6	4158745	4158923	0.423835	Name=Mthfd1l
NC_000069.6	57847351	57847801	0.424494	Name=Pfn2
NC_000067.6	188660724	188660858	0.425025	Name=Ush2a
NC_000072.6	85512141	85512555	0.425699	Name=Egr4
NC_000073.6	7298376	7298893	0.426262	Name=Mir5620
NC_000073.6	7298376	7298893	0.426262	Name=Clcn4
NC_000084.6	67321919	67322136	0.426456	Name=B430212C06Rik
NC_000070.6	100538842	100538909	0.426615	Name=Ube2u
NC_000072.6	122742938	122743002	0.427047	Name=Slc2a3
NC_000073.6	46845686	46845961	0.427082	Name=Ldha
NC_000078.6	30373079	30373471	0.427669	Name=Sntg2
NC_000071.6	115507044	115507135	0.427676	Name=Pxn
NC_000073.6	18894191	18894251	0.427753	Name=Ccdc61
NC_000071.6	92106483	92106702	0.427773	Name=G3bp2
NC_000075.6	74860568	74860994	0.428368	Name=Gm33562
NC_000068.7	172861809	172861891	0.428857	Name=LOC102640035
NC_000068.7	172861809	172861891	0.428857	Name=Gm36254
NC_000069.6	153662199	153662421	0.42945	Name=St6galnac3
NC_000085.6	34735948	34736167	0.429639	Name=Slc16a12
NC_000070.6	32862583	32862756	0.432179	Name=Ankrd6
NC_000081.6	84438150	84438200	0.433551	Name=LOC108168252
NC_000081.6	84438150	84438200	0.433551	Name=1810041L15Rik
NC_000068.7	34639016	34639246	0.433969	Name=Gm34372
NC_000069.6	89238677	89238985	0.434752	Name=Trim46
NC_000078.6	91683416	91683604	0.434908	Name=Gm16876
NC_000078.6	91683416	91683604	0.434908	Name=Ston2
NC_000070.6	44172790	44172872	0.435144	Name=Rnf38
NC_000080.6	66044941	66045118	0.435811	Name=Adam2
NC_000072.6	119847886	119848300	0.43642	Name=3110021A11Rik
NC_000072.6	119847886	119848300	0.43642	Name=Erc1
NC_000068.7	156362608	156362714	0.437447	Name=Gm39972
NC_000068.7	156362608	156362714	0.437447	Name=Cnbd2
NC_000070.6	141445168	141445220	0.437561	Name=Zbtb17
NC_000086.7	73774364	73774492	0.438018	Name=Srpk3
NC_000078.6	21134673	21134758	0.438349	Name=Asap2
NC_000081.6	35846814	35847045	0.438436	Name=Vps13b
NC_000070.6	154625394	154625476	0.438544	Name=Prdm16
NC_000068.7	26475166	26475275	0.439461	Name=Notch1
NC_000076.6	21055011	21055092	0.439567	Name=Ahi1
NC_000072.6	90710095	90710151	0.439568	Name=Iqsec1
NC_000081.6	64313129	64313235	0.440374	Name=Asap1
NC_000079.6	63431736	63432048	0.440874	Name=Fancc
NC_000074.6	33127768	33128099	0.440899	Name=Gm33281
NC_000073.6	99436094	99436145	0.440947	Name=Gdpd5
NC_000072.6	30958943	30959068	0.441282	Name=Klf14
NC_000077.6	102317686	102317855	0.443332	Name=Ubtf
NC_000072.6	55920708	55920776	0.443752	Name=Ccdc129
NC_000071.6	92603050	92603179	0.444374	Name=Stbd1
NC_000070.6	149737622	149737985	0.444779	Name=Tmem201
NC_000067.6	134361765	134362168	0.445912	Name=Tmem183a
NC_000068.7	151869732	151869875	0.446236	Name=Rspo4
NC_000077.6	117264374	117264840	0.446276	Name=Gm39478
NC_000077.6	117264374	117264840	0.446276	Name=Sept9
NC_000082.6	57549011	57549464	0.447436	Name=Cmss1
NC_000082.6	57549011	57549464	0.447436	Name=Filip1l
NC_000071.6	25768853	25769221	0.44776	Name=Gm42237
NC_000071.6	25768853	25769221	0.44776	Name=Actr3b
NC_000070.6	126147416	126147592	0.447781	Name=Eva1b
NC_000081.6	80173524	80173927	0.448107	Name=Mgat3
NC_000067.6	136229205	136229274	0.449039	Name=5730559C18Rik
NC_000071.6	65435807	65436067	0.44963	Name=Ugdh
NC_000083.6	47454922	47455079	0.450529	Name=AI661453
NC_000071.6	115193356	115193689	0.450625	Name=Cabp1
NC_000074.6	93810534	93810806	0.45075	Name=Gnao1
NC_000083.6	6037628	6037998	0.451868	Name=Synj2
NC_000068.7	85029957	85030178	0.452434	Name=P2rx3
NC_000070.6	106678710	106679101	0.454763	Name=Ttc4
NC_000071.6	139797446	139797530	0.455043	Name=Mafk
NC_000067.6	42624535	42624613	0.45554	Name=Gm30248
NC_000076.6	62193182	62193257	0.456115	Name=Tspan15
NC_000068.7	105680624	105680749	0.456171	Name=Pax6
NC_000075.6	40685984	40686204	0.456594	Name=Clmp
NC_000074.6	11497502	11497991	0.456633	Name=Carkd
NC_000082.6	14943667	14943726	0.457549	Name=Gm33696
NC_000082.6	14943667	14943726	0.457549	Name=Efcab1
NC_000073.6	143736096	143736172	0.458192	Name=Osbpl5
NC_000080.6	111676071	111676338	0.459818	Name=Slitrk5
NC_000067.6	136173479	136173720	0.460617	Name=Kif21b
NC_000070.6	46598459	46598562	0.460751	Name=Coro2a
NC_000070.6	134160785	134161041	0.460841	Name=LOC108169013
NC_000070.6	134160785	134161041	0.460841	Name=Cep85
NC_000077.6	21563741	21563793	0.461695	Name=Mdh1
NC_000073.6	79464844	79465179	0.461874	Name=Polg
NC_000070.6	58911546	58911914	0.462	Name=AI314180
NC_000077.6	6008427	6009174	0.462465	Name=Gm40812
NC_000077.6	6008427	6009174	0.462465	Name=Camk2b
NC_000079.6	24826240	24826514	0.463087	Name=Acot13
NC_000068.7	160349610	160349661	0.463589	Name=LOC108168810
NC_000075.6	87157316	87157569	0.464055	Name=Mrap2
NC_000079.6	53504761	53505046	0.46655	Name=Gm33873
NC_000067.6	77824573	77824817	0.466702	Name=Gm33083
NC_000067.6	77824573	77824817	0.466702	Name=Gm33030
NC_000086.7	58155958	58156156	0.466845	Name=Gm36522
NC_000067.6	136231764	136232018	0.466915	Name=5730559C18Rik
NC_000084.6	53569276	53569363	0.467034	Name=Prdm6
NC_000080.6	30553032	30553097	0.467161	Name=Tkt
NC_000086.7	101732935	101733266	0.467682	Name=Cxcr3
NC_000072.6	30864280	30864371	0.467796	Name=Copg2
NC_000071.6	22367287	22367448	0.467895	Name=Gm42223
NC_000072.6	4749414	4749483	0.468192	Name=Peg10
NC_000085.6	53531689	53531847	0.469133	Name=Dusp5
NC_000076.6	42054785	42054849	0.469317	Name=Gm40630
NC_000084.6	7609195	7609494	0.469458	Name=Mpp7
NC_000073.6	128633295	128633402	0.469709	Name=Inpp5f
NC_000071.6	94304687	94304747	0.469999	Name=Gm6502
NC_000071.6	94304687	94304747	0.469999	Name=A430089I19Rik
NC_000077.6	106374819	106375056	0.470173	Name=Prr29
NC_000071.6	65941294	65941535	0.47137	Name=Chrna9
NC_000068.7	40795876	40795945	0.471674	Name=Lrp1b
NC_000086.7	93289249	93289385	0.471757	Name=Arx
NC_000086.7	20425379	20425742	0.472096	Name=Jade3
NC_000070.6	149040785	149040882	0.472402	Name=Pex14
NC_000077.6	115463303	115463462	0.472513	Name=Gm11695
NC_000077.6	115463303	115463462	0.472513	Name=Slc16a5
NC_000081.6	66803525	66803664	0.473096	Name=Sla
NC_000081.6	66803525	66803664	0.473096	Name=Tg
NC_000070.6	128957772	128957970	0.475594	Name=Azin2
NC_000081.6	83681021	83681072	0.475866	Name=Scube1
NC_000081.6	3569014	3569086	0.476095	Name=Ghr
NC_000077.6	78466392	78466597	0.476647	Name=Slc46a1
NC_000070.6	33248056	33248582	0.477939	Name=Pnrc1
NC_000073.6	143174775	143174910	0.477986	Name=Kcnq1
NC_000082.6	31068425	31068510	0.478451	Name=Xxylt1
NC_000070.6	41497775	41498263	0.479354	Name=AI464131
NC_000080.6	59842999	59843169	0.479361	Name=Atp8a2
NC_000085.6	12472632	12472844	0.480083	Name=Dtx4
NC_000070.6	144673265	144673335	0.480461	Name=Gm436
NC_000076.6	81424251	81424353	0.480823	Name=Nfic
NC_000086.7	42535082	42535218	0.481007	Name=Tenm1
NC_000086.7	74428146	74428589	0.481432	Name=G6pdx
NC_000086.7	74428146	74428589	0.481432	Name=Ikbkg
NC_000076.6	128921784	128922035	0.483952	Name=Bloc1s1
NC_000074.6	3234863	3234950	0.486779	Name=Insr
NC_000074.6	84965160	84965421	0.487374	Name=Rnaseh2a
NC_000086.7	9942956	9943113	0.487818	Name=Sytl5
NC_000071.6	27416931	27416986	0.48846	Name=Dpp6
NC_000085.6	8664354	8664449	0.488651	Name=Chrm1
NC_000082.6	88289727	88290048	0.488873	Name=Grik1
NC_000070.6	152297238	152297583	0.489157	Name=Icmt
NC_000078.6	3352249	3352309	0.490151	Name=Gm26520
NC_000069.6	86787156	86787464	0.49185	Name=Dclk2
NC_000084.6	36160567	36160649	0.492775	Name=Nrg2
NC_000067.6	60866329	60866390	0.493007	Name=Gm38137
NC_000074.6	68596208	68596266	0.493517	Name=Csgalnact1
NC_000077.6	93585164	93585412	0.495323	Name=Car10
NC_000080.6	27622234	27622566	0.495432	Name=Erc2
NC_000086.7	159627516	159627906	0.496044	Name=Sh3kbp1
NC_000070.6	133379832	133380069	0.496672	Name=Slc9a1
NC_000084.6	64637875	64637936	0.497941	Name=Atp8b1
NC_000073.6	133996340	133996422	0.498462	Name=Adam12
NC_000085.6	10229904	10230004	0.498574	Name=Myrf
NC_000081.6	6607688	6607795	0.498947	Name=LOC102632231
NC_000081.6	6607688	6607795	0.498947	Name=Fyb
NC_000084.6	42975039	42975103	0.499305	Name=Ppp2r2b
NC_000082.6	72392809	72393057	0.501085	Name=Robo1
NC_000068.7	118537440	118537512	0.503559	Name=Bmf
NC_000079.6	74725787	74725915	0.506577	Name=Cast
NC_000069.6	81933501	81933551	0.506781	Name=Ctso
NC_000077.6	85841856	85842357	0.506899	Name=Tbx2
NC_000068.7	152247598	152247736	0.509003	Name=Csnk2a1
NC_000078.6	26609548	26609658	0.509854	Name=1700020D12Rik
NC_000078.6	82643835	82643939	0.512424	Name=Rgs6
NC_000080.6	11622579	11622841	0.513111	Name=Ptprg
NC_000071.6	25088748	25088930	0.513527	Name=Prkag2
NC_000079.6	59015600	59015808	0.514944	Name=Ntrk2
NC_000068.7	26021430	26021931	0.516212	Name=Ubac1
NC_000073.6	19822405	19822830	0.520491	Name=Bcl3
NC_000069.6	67994768	67994863	0.521709	Name=Iqcj
NC_000069.6	67994768	67994863	0.521709	Name=Gm21949
NC_000082.6	78376474	78377056	0.524066	Name=Btg3
NC_000072.6	100063166	100063326	0.524358	Name=Gm33243
NC_000071.6	13154985	13155051	0.525079	Name=Sema3a
NC_000086.7	59521842	59521926	0.527811	Name=Fgf13
NC_000070.6	132260990	132261235	0.529033	Name=Gm28874
NC_000070.6	132260990	132261235	0.529033	Name=Gmeb1
NC_000074.6	117380716	117380852	0.529614	Name=Cmip
NC_000073.6	19769246	19769492	0.531796	Name=Gm34744
NC_000073.6	19769246	19769492	0.531796	Name=Bcam
NC_000084.6	45757060	45757175	0.534317	Name=A330093E20Rik
NC_000067.6	164457670	164458066	0.534533	Name=Atp1b1
NC_000076.6	128412884	128412970	0.535713	Name=Rnf41
NC_000078.6	20426983	20427184	0.535858	Name=LOC108167321
NC_000086.7	48025869	48025990	0.536475	Name=Apln
NC_000074.6	120227238	120227325	0.536631	Name=A330074K22Rik
NC_000073.6	134224623	134225115	0.536712	Name=Adam12
NC_000067.6	100317789	100317874	0.536811	Name=Cntnap5b
NC_000086.7	13677953	13678005	0.541373	Name=Cask
NC_000082.6	64496927	64496994	0.543166	Name=Csnka2ip
NC_000081.6	10986323	10986506	0.543453	Name=Amacr
NC_000077.6	102225990	102226097	0.545044	Name=Hdac5
NC_000070.6	41691031	41691111	0.546619	Name=Cntfr
NC_000070.6	154411121	154411270	0.550944	Name=Prdm16
NC_000067.6	74108220	74108458	0.552859	Name=Tns1
NC_000070.6	108002112	108002342	0.555922	Name=Slc1a7
NC_000070.6	106499397	106499478	0.555994	Name=Tmem61
NC_000075.6	36915136	36915215	0.556016	Name=Pknox2
NC_000076.6	90122248	90122309	0.556904	Name=Anks1b
NC_000073.6	9076990	9078297	0.560044	Name=Vmn2r38
NC_000086.7	166350724	166350777	0.561205	Name=Gpm6b
NC_000079.6	21812761	21814304	0.562143	Name=LOC108168067
NC_000080.6	93311274	93311345	0.562265	Name=Pcdh9
NC_000074.6	72770431	72770557	0.564575	Name=Gm39198
NC_000086.7	86995016	86995117	0.565249	Name=Il1rapl1
NC_000072.6	84419349	84419449	0.565793	Name=Gm10445
NC_000073.6	59880300	59880385	0.570764	Name=LOC102640292
NC_000073.6	8860540	8860650	0.57404	Name=Gm20482
NC_000080.6	54296699	54297017	0.575216	Name=LOC108168162
NC_000083.6	58138041	58138257	0.587953	Name=Cntnap5c
NC_000086.7	7572604	7572888	0.588525	Name=Ppp1r3f
NC_000071.6	108436766	108436851	0.591358	Name=Gm34319
NC_000086.7	8145547	8145955	0.59499	Name=Rbm3os
NC_000086.7	8145547	8145955	0.59499	Name=Rbm3
NC_000070.6	63742160	63742341	0.595031	Name=Tnfsf15
NC_000070.6	63742160	63742341	0.595031	Name=Gm42295
NC_000070.6	134161651	134161822	0.599805	Name=LOC108169013
NC_000070.6	134161651	134161822	0.599805	Name=Cep85
NC_000068.7	156475842	156476182	0.60301	Name=Epb41l1
NC_000080.6	41955147	41955233	0.612319	Name=1700024B05Rik
NC_000080.6	41955147	41955233	0.612319	Name=LOC102639037
NC_000078.6	33957807	33957989	0.613865	Name=Twist1
NC_000073.6	82335250	82335530	0.61752	Name=Adamtsl3
NC_000086.7	38601275	38601363	0.621778	Name=Mcts1
NC_000074.6	94620257	94620841	0.630255	Name=Rspry1
NC_000086.7	75873744	75873990	0.633422	Name=Pls3
NC_000086.7	6172089	6172434	0.634946	Name=Nudt10
NC_000086.7	6172089	6172434	0.634946	Name=Gm33733
NC_000086.7	17140273	17140370	0.63847	Name=Efhc2
NC_000086.7	160418376	160418445	0.649206	Name=Adgrg2
NC_000082.6	41860051	41860105	0.657778	Name=Lsamp
NC_000081.6	9688899	9688951	0.672573	Name=Spef2
NC_000086.7	24767015	24767099	0.688727	Name=Gm5935
NC_000070.6	150926660	150926825	0.689631	Name=Tnfrsf9
NC_000085.6	45146694	45146759	0.772407	Name=Gm35923

## Sheet: 8. Up genes WGBS loss
geneID	chr	start	end	mCG_T0_TSS500	mCG_D3_DDC_TSS500	mCG_D5_DDC_TSS500	target_id	T0_tpm_n2	D3_DDC_tpm_n2	D5_DDC_tpm_n2
Prr36	NC_000074.6	4217036	4218035	0.791667	0.0344828	0.113636	ENSMUSG00000064125	2.20612	11.9144	4.47332
Ccdc102a	NC_000074.6	94917599	94918598	0.75	0.04	0.0769231	ENSMUSG00000063605	1.93083	3.85829	5.90634
Dut	NC_000068.7	125246748	125247747	0.555556	0	0.0597015	ENSMUSG00000027203	7.91446	23.0543	19.2258
Snx22	NC_000075.6	66069232	66070231	0.583333	0.113924	0.119403	ENSMUSG00000039452	7.54866	13.2028	12.9964
Ace	NC_000077.6	105967445	105968444	0.545455	0.1	0	ENSMUSG00000020681	0.294405	4.43537	4.63474
Apool	NC_000086.7	112310852	112311851	0.444444	0	0	ENSMUSG00000025525	14.262	31.5207	23.2601
Pcolce	NC_000071.6	137611265	137612264	0.643836	0.230769	0.654545	ENSMUSG00000029718	21.3722	56.6631	50.2911
S100a14	NC_000069.6	90526349	90527348	0.791045	0.388889	0.722222	ENSMUSG00000042306	9.39666	20.5198	47.2739
Asb8	NC_000081.6	98165102	98166101	0.605263	0.214286	0.622222	ENSMUSG00000048175	4.5718	11.1718	14.7298
Fxyd3	NC_000073.6	31076198	31077197	0.405941	0.0277778	0.347222	ENSMUSG00000057092	137.969	214.286	239.554
Triobp	NC_000081.6	78947224	78948223	0.373626	0	0.174157	ENSMUSG00000033088	15.6155	31.8326	29.1811
Hacd4	NC_000070.6	88438437	88439436	0.363636	0	0.138889	ENSMUSG00000028497	4.27229	5.21002	8.21584
Tgfb1i1	NC_000073.6	128246299	128247298	0.363636	0	0.224	ENSMUSG00000030782	10.2867	40.9103	32.5393
Dyrk1b	NC_000073.6	28178983	28179982	0.5	0.141509	0.216981	ENSMUSG00000002409	16.3399	19.7358	37.1742
Samd10	NC_000068.7	181598992	181599991	1	0.666667	1	ENSMUSG00000038605	13.6136	24.1345	38.1805
Ccl2	NC_000077.6	82035077	82036076	0.769231	0.444444	0.333333	ENSMUSG00000035385	10.7265	135.109	584.827
Atl3	NC_000085.6	7493526	7494525	0.540323	0.223301	0.399142	ENSMUSG00000024759	19.2957	37.6343	39.818
Galnt12	NC_000070.6	47091409	47092408	0.352941	0.0487805	0.034965	ENSMUSG00000039774	4.71035	12.1913	7.98451
Cdh6	NC_000081.6	13175977	13176976	1	0.696629	0.688073	ENSMUSG00000039385	40.5647	73.8187	62.4251
Col5a2	NC_000067.6	45502783	45503782	0.559701	0.26087	0.462687	ENSMUSG00000026042	0.184321	3.66941	3.50822
Pck2	NC_000080.6	55539763	55540762	0.363636	0.0933333	0	ENSMUSG00000040618	52.194	90.8912	74.6926
Rad18	NC_000072.6	112696193	112697192	0.345455	0.0875	0.0918635	ENSMUSG00000030254	6.11837	27.1898	26.6606
Rffl	NC_000077.6	82870739	82871738	0.291667	0.0394737	0.112245	ENSMUSG00000020696	8.41809	16.1575	14.3968
Frrs1	NC_000069.6	116859067	116860066	0.77027	0.522727	0.732558	ENSMUSG00000033386	32.978	65.1315	66.6269
Fopnl	NC_000082.6	14317587	14318586	0.563636	0.319728	0.419355	ENSMUSG00000022677	20.0375	31.041	33.7581
Nr2c2ap	NC_000074.6	70130827	70131826	0.241758	0	0.180982	ENSMUSG00000071078	30.1529	52.8714	43.8486
Hebp2	NC_000076.6	18545577	18546576	0.264706	0.025641	0.033557	ENSMUSG00000019853	10.7097	26.247	28.7135
Arhgef39	NC_000070.6	43508270	43509269	0.529412	0.291667	0.270936	ENSMUSG00000051517	0.796382	2.51894	6.23925
Ctla2a	NC_000079.6	60936126	60937125	0.777778	0.545455	0.764706	ENSMUSG00000044258	7.4376	39.5689	35.1776
L3mbtl3	NC_000076.6	26375493	26376492	0.230769	0	0.0672269	ENSMUSG00000039089	2.93011	5.11798	7.56339
Heg1	NC_000082.6	33683930	33684929	0.47619	0.25	0.128571	ENSMUSG00000075254	38.9765	200.82	284.789
Fbxw17	NC_000079.6	50417334	50418333	0.690476	0.467391	0.318182	ENSMUSG00000037816	6.03555	16.0379	23.174
Ctsz	NC_000068.7	174438540	174439539	0.222222	0	0.0229885	ENSMUSG00000016256	54.0513	95.9132	87.5775
Acp5	NC_000075.6	22135247	22136246	0.977273	0.755556	0.833333	ENSMUSG00000001348	2.5796	7.86758	7.15572
Col1a1	NC_000077.6	94935724	94936723	0.214286	0	0.444444	ENSMUSG00000001506	2.952	22.0032	20.0371
Htatip2	NC_000073.6	49758544	49759543	0.32	0.109756	0.337079	ENSMUSG00000039745	6.18396	14.5988	12.4941
Rasal1	NC_000071.6	120647540	120648539	0.383333	0.176471	0.247312	ENSMUSG00000029602	12.2477	30.5045	58.2653
Camk1d	NC_000068.7	5714858	5715857	0.704545	0.5	0.625	ENSMUSG00000039145	0.710661	2.34354	4.97842
Pole2	NC_000078.6	69227748	69228747	0.294574	0.0909091	0.376812	ENSMUSG00000020974	1.37097	8.65503	5.44189
Dnmt1	NC_000075.6	20959389	20960388	1	0.8	0.9	ENSMUSG00000004099	17.0492	48.8976	35.7698
Mmp19	NC_000076.6	128790410	128791409	0.2	0	0	ENSMUSG00000025355	1.01799	4.14216	5.66547
Necap2	NC_000070.6	141077859	141078858	0.205607	0.0125	0.298246	ENSMUSG00000028923	26.2335	54.0296	46.2575
Pigq	NC_000083.6	25942378	25943377	0.833333	0.642857	0.714286	ENSMUSG00000025728	42.1206	95.7948	81.4173
Tnfrsf23	NC_000073.6	143685936	143686935	0.428571	0.239583	0.3125	ENSMUSG00000037613	4.30258	21.9	36.73
Stom	NC_000068.7	35336510	35337509	0.186813	0	0.130081	ENSMUSG00000026880	11.2794	28.3333	59.8863
Lig4	NC_000074.6	9977182	9978181	0.186667	0	0.120253	ENSMUSG00000049717	1.91031	3.547	4.13789
Uaca	NC_000075.6	60792706	60793705	0.849057	0.666667	0.757576	ENSMUSG00000034485	6.17913	9.73917	13.5722
Sult2b1	NC_000073.6	45759056	45760055	0.179104	0	0.119048	ENSMUSG00000003271	15.364	28.667	31.2486
Scnn1a	NC_000072.6	125320552	125321551	0.766667	0.588235	0.785714	ENSMUSG00000030340	4.04693	13.5136	9.03602
Lamb3	NC_000067.6	193293853	193294852	0.878788	0.703704	0.72	ENSMUSG00000026639	23.0219	60.499	70.8089
Fam129a	NC_000067.6	151570873	151571872	0.2	0.0277778	0.357143	ENSMUSG00000026483	52.9419	72.4544	92.3934
St6gal1	NC_000082.6	23224240	23225239	0.277311	0.105263	0.392593	ENSMUSG00000022885	11.8045	46.6643	49.8541
Eva1c	NC_000082.6	90826219	90827218	0.8	0.633333	0.894737	ENSMUSG00000039903	7.84396	6.98881	14.5489
Cnn2	NC_000076.6	79988100	79989099	0.222222	0.0618557	0.226994	ENSMUSG00000004665	51.7272	170.088	197.04
Fkbp10	NC_000077.6	100415194	100416193	0.25	0.09375	0.197531	ENSMUSG00000001555	9.45755	25.5018	22.4311
Pglyrp1	NC_000073.6	18884190	18885189	0.343284	0.189189	0.175258	ENSMUSG00000030413	14.9826	30.0459	68.9589
Tnip3	NC_000072.6	65589898	65590897	0.890244	0.744186	0.675	ENSMUSG00000044162	3.18994	4.42024	17.2879
Cda	NC_000070.6	138367812	138368811	0.252174	0.107143	0.3125	ENSMUSG00000028755	9.35508	42.8004	42.224
Sprr1a	NC_000069.6	92485382	92486381	1	0.857143	0.893617	ENSMUSG00000050359	2353.11	5338.03	5147.51
Pdgfa	NC_000071.6	138997187	138998186	0.141176	0	0.576271	ENSMUSG00000025856	45.6074	80.685	62.184
Abhd6	NC_000080.6	8002303	8003302	0.231343	0.091954	0.0901961	ENSMUSG00000025277	10.3466	19.2877	13.4806
Faap20	NC_000070.6	155246256	155247255	0.794118	0.655172	0.764706	ENSMUSG00000073684	7.89429	25.5676	25.3416
Lrrc8b	NC_000071.6	105415275	105416274	0.136364	0	0	ENSMUSG00000070639	8.14943	13.6975	13.3763
Cideb	NC_000080.6	55757925	55758924	0.147541	0.0126582	0.152941	ENSMUSG00000022219	4.97748	14.6099	21.6082
Uri1	NC_000073.6	38023076	38024075	0.912	0.777778	0.931818	ENSMUSG00000030421	13.3904	26.4758	30.0326
Nrp1	NC_000074.6	128357783	128358782	0.133333	0	0.0235849	ENSMUSG00000025810	9.30549	21.4405	19.4363
Sema6d	NC_000068.7	124089418	124090417	0.255319	0.125	0.0756303	ENSMUSG00000027200	4.01943	6.90961	10.8456
Nupr1	NC_000073.6	126624971	126625970	0.679012	0.551724	0.557143	ENSMUSG00000030717	89.1085	284.065	513.479
Mtmr7	NC_000074.6	40634424	40635423	0.244444	0.117647	0.096	ENSMUSG00000039431	6.56341	21.0525	13.2016
Aoc1	NC_000072.6	48894755	48895754	0.30303	0.176471	0.151515	ENSMUSG00000029811	1.34565	1.75804	5.28305
Aif1l	NC_000068.7	31949803	31950802	0.181818	0.0555556	0.0555556	ENSMUSG00000001864	29.2521	73.234	64.4762
Il1f6	NC_000068.7	24214917	24215916	0.703704	0.577465	0.795918	ENSMUSG00000026984	0.550629	3.41623	12.4791
Wfdc18	NC_000077.6	83708504	83709503	0.506849	0.380952	0.369863	ENSMUSG00000000983	5.44078	46.1646	126.035
Fabp5	NC_000069.6	10012085	10013084	0.125	0	0.0234375	ENSMUSG00000027533	130.003	260.277	298.045
Rnf125	NC_000084.6	20944125	20945124	0.471429	0.347826	0.336	ENSMUSG00000033107	7.71579	15.7203	17.1401
Nup93	NC_000074.6	94214040	94215039	0.121212	0	0.104348	ENSMUSG00000032939	11.3653	31.7944	31.8953
Btbd2	NC_000076.6	80656625	80657624	0.117647	0	0.0625	ENSMUSG00000003344	6.56953	14.5257	9.18243
Rbp1	NC_000075.6	98422461	98423460	0.517241	0.4	0.62963	ENSMUSG00000046402	4.76854	17.1072	24.6504
Zfp938	NC_000076.6	82240776	82241775	0.238994	0.121951	0.169492	ENSMUSG00000062931	1.87953	3.73601	4.44635
Akap12	NC_000076.6	4265829	4266828	0.25	0.133333	0.17757	ENSMUSG00000038587	13.6714	79.5715	97.6599
Tmem102	NC_000077.6	69805125	69806124	0.114286	0	0.0918367	ENSMUSG00000089876	8.42942	12.826	15.947
Dhrs9	NC_000068.7	69379962	69380961	0.528571	0.414815	0.538462	ENSMUSG00000027068	2.38025	8.84022	11.0211
1700017B05Rik	NC_000075.6	57262100	57263099	0.130435	0.0172414	0.0289017	ENSMUSG00000032300	36.9533	78.2476	83.2331
Myo7a	NC_000073.6	98119025	98120024	0.555556	0.444444	0.254545	ENSMUSG00000030761	25.5352	38.6589	50.8632
Bax	NC_000073.6	45467706	45468705	1	0.888889	0.545455	ENSMUSG00000003873	36.5001	80.9128	101.303
Tmco4	NC_000070.6	138971606	138972605	0.111111	0	0.337209	ENSMUSG00000041143	8.13311	19.2679	16.7994
Vat1	NC_000077.6	101465700	101466699	0.136364	0.0263158	0.00492611	ENSMUSG00000034993	29.644	83.6881	101.406
Synpo	NC_000084.6	60659675	60660674	0.607843	0.5	0.541176	ENSMUSG00000043079	14.7385	64.5721	54.8947
Col3a1	NC_000067.6	45311038	45312037	0.95	0.84375	0.894737	ENSMUSG00000026043	12.4062	74.6389	46.8792
Cldn4	NC_000071.6	134946435	134947434	0.221239	0.115385	0.205128	ENSMUSG00000047501	2351.34	3972.44	4774.57
Cd53	NC_000069.6	106789650	106790649	0.938776	0.833333	0.837209	ENSMUSG00000040747	1.79894	4.94603	5.38474
Plau	NC_000080.6	20836162	20837161	0.119048	0.0138889	0.101695	ENSMUSG00000021822	38.1043	88.4764	154.152
Artn	NC_000070.6	117930296	117931295	0.9375	0.833333	0.533333	ENSMUSG00000028539	3.97286	5.50179	11.2298
Sulf2	NC_000068.7	166155184	166156183	0.194805	0.0931373	0.092233	ENSMUSG00000006800	0.676431	7.38922	11.5764
Myadm	NW_004058052.1	287063	288062	0.6	0.5	0.357143	ENSMUSG00000068566	680.762	1294.61	1114.49
Cyp3a11	NC_000071.6	145879355	145880354	0.875	0.777778	0.809524	ENSMUSG00000056035	3.1641	10.5884	2.16104
Adora1	NC_000067.6	134234958	134235957	0.218182	0.121212	0.0188679	ENSMUSG00000042429	19.8659	52.1551	45.9843
Gc	NC_000071.6	89457399	89458398	0.0967742	0	0.181818	ENSMUSG00000035540	86.0576	841.249	949.1
Cdca7l	NC_000078.6	117842973	117843972	0.181818	0.0869565	0.154762	ENSMUSG00000021175	2.3004	5.62938	12.1835
Pcsk9	NC_000070.6	106463826	106464825	0.09375	0	0	ENSMUSG00000044254	22.8474	42.9102	47.4207
Tmed8	NC_000078.6	87199730	87200729	0.1	0.00628931	0.0408163	ENSMUSG00000034111	2.80187	6.51895	5.6064
Syt8	NC_000073.6	142433961	142434960	0.424658	0.333333	0.322581	ENSMUSG00000031098	0	3.41989	5.75064
Ckb	NC_000078.6	111671839	111672838	0.140351	0.05	0.203008	ENSMUSG00000001270	27.0995	128.205	187.138
Armc10	NC_000071.6	21645484	21646483	0.0888889	0	0	ENSMUSG00000038525	25.7678	42.667	46.3417
Serpinb5	NC_000067.6	106860680	106861679	0.715686	0.627119	0.657895	ENSMUSG00000067006	2.14192	0.95365	8.24086
Evc2	NC_000071.6	37337978	37338977	0.338235	0.25	0.2	ENSMUSG00000050248	10.8835	12.1619	20.6967
P2rx4	NC_000071.6	122707009	122708008	0.173077	0.0869565	0.0251572	ENSMUSG00000029470	19.0465	30.0974	37.6615
Fgr	NC_000070.6	132973595	132974594	0.301887	0.217391	0.365854	ENSMUSG00000028874	3.06722	7.21209	7.93919
Klhl5	NC_000071.6	65107027	65108026	0.142857	0.0588235	0.0340909	ENSMUSG00000054920	5.57031	11.1136	9.35219
Cyb561	NC_000077.6	105944619	105945618	0.25	0.166667	0.302632	ENSMUSG00000019590	27.5739	54.1897	54.9538
Msln	NC_000083.6	25753947	25754946	0.871795	0.788732	0.670588	ENSMUSG00000063011	9.25089	16.9124	37.2257
Ctla2b	NC_000079.6	60897435	60898434	0.74	0.657143	0.578947	ENSMUSG00000074874	0.762251	17.1828	11.6703
Hist1h1c	NC_000079.6	23738307	23739306	0.0928571	0.011236	0.031746	ENSMUSG00000036181	2.99871	4.69434	12.0277
Stk11ip	NC_000067.6	75521029	75522028	0.0801527	0	0	ENSMUSG00000026213	16.7874	43.3921	32.2729
Slc8b1	NC_000071.6	120510668	120511667	0.0857143	0.00595238	0.0675676	ENSMUSG00000032754	5.55145	9.27697	10.7927
Prr15l	NC_000077.6	96925675	96926674	0.947368	0.868421	0.9	ENSMUSG00000047040	13.8078	20.6416	29.7568
Gjb3	NC_000070.6	127330337	127331336	0.0789474	0	0.141104	ENSMUSG00000042367	1.35981	10.3565	15.5313
Rin2	NC_000068.7	145771227	145772226	0.904255	0.826087	0.936709	ENSMUSG00000001768	14.5599	37.551	39.7939
Trib3	NC_000068.7	152343561	152344560	0.078125	0	0.0331126	ENSMUSG00000032715	33.3618	65.2871	49.4215
Dynlt1b	NC_000083.6	6429612	6430611	0.0777778	0	0	ENSMUSG00000096255	27.5978	75.3451	95.5881
Hsd3b7	NC_000073.6	127800101	127801100	0.3	0.222222	0.75	ENSMUSG00000042289	37.4188	74.1797	60.8666
Ost4	NC_000071.6	30907311	30908310	0.086758	0.00917431	0.0703704	ENSMUSG00000038803	39.8995	68.0481	74.1949
Ap1s1	NC_000071.6	137045561	137046560	0.0769231	0	0.0147059	ENSMUSG00000004849	24.0763	62.39	65.2171
Hps1	NC_000085.6	42779497	42780496	0.122449	0.0465116	0.0135135	ENSMUSG00000025188	4.8486	8.29789	9.0011
Ptk7	NC_000083.6	46629550	46630549	0.357143	0.28125	0.666667	ENSMUSG00000023972	17.777	41.1075	46.9304
Myzap	NC_000075.6	71591861	71592860	0.0757576	0	0.0111111	ENSMUSG00000041361	3.55804	12.1118	9.82056
Ceacam1	NC_000073.6	25477126	25478125	0.166667	0.0909091	0.26	ENSMUSG00000074272	250.965	563.988	588.375
Poc1a	NC_000075.6	106280522	106281521	0.0738916	0	0.00401606	ENSMUSG00000023345	0.782421	4.69326	5.57025
Cdh17	NC_000070.6	11757657	11758656	0.859375	0.785714	0.776316	ENSMUSG00000028217	0.432493	11.7168	15.8926
Ctu1	NC_000073.6	43671476	43672475	0.0675676	0	0.017094	ENSMUSG00000038888	6.50019	8.71179	14.4197
Mtmr6	NC_000080.6	60264678	60265677	0.0666667	0	0.00934579	ENSMUSG00000021987	10.1183	17.7439	20.2008
Bloc1s6	NC_000068.7	122738005	122739004	0.0917431	0.0263158	0.0666667	ENSMUSG00000005804	6.75382	13.087	18.4321
Fgb	NC_000069.6	83049364	83050363	0.465347	0.4	0.369697	ENSMUSG00000033831	10.131	21.4705	37.073
Cdkn2b	NC_000070.6	89310533	89311532	0.2	0.135135	0.0216049	ENSMUSG00000073802	9.95158	3.14466	12.7257
Agr2	NC_000078.6	35992425	35993424	0.632075	0.567568	0.375	ENSMUSG00000020581	0	1.60668	13.9261
Mapk11	NC_000081.6	89149107	89150106	0.0642202	0	0.0625	ENSMUSG00000053137	3.23748	9.16745	18.1465
Nes	NC_000069.6	87970593	87971592	0.0636364	0	0.0225225	ENSMUSG00000004891	3.83318	11.45	13.9484
Lrg1	NC_000083.6	56121447	56122446	0.823529	0.76	0.695652	ENSMUSG00000037095	46.0051	93.5626	116.354
Ddr1	NC_000083.6	35704131	35705130	0.0634921	0	0	ENSMUSG00000003534	263.787	501.84	411.373
Fuk	NC_000074.6	110901989	110902988	0.229885	0.166667	0.158537	ENSMUSG00000033703	7.4376	13.5508	10.0859
Ptp4a3	NC_000081.6	73722645	73723644	0.881356	0.818182	0.852459	ENSMUSG00000059895	3.616	7.64616	9.45823
Gid8	NC_000068.7	180709726	180710725	0.0625	0	0	ENSMUSG00000027573	17.5161	33.7178	34.2348
Zfp90	NC_000074.6	106414783	106415782	0.0625	0	0	ENSMUSG00000031907	6.25666	5.79545	12.3646
Tpcn2	NC_000073.6	145283512	145284511	0.0612245	0	0.0956522	ENSMUSG00000048677	7.93655	14.4934	16.4449
Aph1a	NC_000069.6	95893421	95894420	0.0606061	0	0.0512821	ENSMUSG00000015750	47.2687	94.0904	96.1188
Mcm5	NC_000074.6	75109008	75110007	0.0662252	0.00621118	0	ENSMUSG00000005410	5.61175	32.036	37.9789
Bco1	NC_000074.6	117095351	117096350	0.376068	0.316239	0.307692	ENSMUSG00000031845	1.99933	4.43195	4.8765
Rpa1	NC_000077.6	75347884	75348883	0.0592885	0	0.00653595	ENSMUSG00000000751	24.6676	46.1585	40.7113
Aurkb	NC_000077.6	69045125	69046124	0.10084	0.0422535	0.0634921	ENSMUSG00000020897	0.136527	4.47695	11.5703
Slpi	NC_000068.7	164356008	164357007	0.313725	0.255319	0.327273	ENSMUSG00000017002	1.12171	22.4997	21.4878
Polr3k	NC_000068.7	181863860	181864859	0.0572687	0	0	ENSMUSG00000038628	10.3498	18.2021	15.9007
Dusp18	NC_000077.6	3894639	3895638	0.0571429	0	0.0689655	ENSMUSG00000047205	6.18871	14.6126	9.35792
Agt	NC_000074.6	124569208	124570207	0.24	0.184211	0.212121	ENSMUSG00000031980	31.7814	36.4901	60.5153
Pmaip1	NC_000084.6	66458104	66459103	0.0555556	0	0.0215054	ENSMUSG00000024521	13.6271	22.9798	32.6392
B4galnt1	NC_000076.6	127164656	127165655	0.254902	0.2	0.132353	ENSMUSG00000006731	17.977	46.0907	43.8344
Clec4d	NC_000072.6	123261607	123262606	0.648649	0.59375	0.575	ENSMUSG00000030144	0.441399	7.29035	7.53484
Myrf	NC_000085.6	10240282	10241281	0.112903	0.0588235	0.0664653	ENSMUSG00000036098	81.4888	135.904	128.307
Lig1	NC_000073.6	13276813	13277812	0.852941	0.8	0.875	ENSMUSG00000056394	14.082	35.1162	46.8225
Cd44	NC_000068.7	102901170	102902169	0.0526316	0	0.056	ENSMUSG00000005087	149.442	424.258	472.223
Pglyrp4	NC_000069.6	90726406	90727405	0.926829	0.875	0.862069	ENSMUSG00000042250	0	2.71798	7.61738
Pgm3	NC_000075.6	86571343	86572342	0.0517241	0	0.0243902	ENSMUSG00000056131	9.10935	15.4692	16.1949
Podxl2	NC_000072.6	88874554	88875553	0.227273	0.176991	0.0959596	ENSMUSG00000033152	5.5699	0	3.25208
Slc35d2	NC_000079.6	64128886	64129885	0.0803571	0.0306122	0.00970874	ENSMUSG00000033114	4.47916	7.294	15.8674
Hdac7	NC_000081.6	97844003	97845002	0.882353	0.833333	0.754098	ENSMUSG00000022475	36.4278	50.2955	74.4342
Serpinb6b	NC_000079.6	32956311	32957310	0.673913	0.625	0.763158	ENSMUSG00000042842	91.0001	277.47	355.905
Smpd4	NC_000082.6	17618854	17619853	0.0479452	0	0.045614	ENSMUSG00000005899	26.9493	46.1466	36.7636
Bend5	NC_000070.6	111413294	111414293	1	0.952381	0.893617	ENSMUSG00000028545	22.5303	56.8219	48.8372
Cd47	NC_000082.6	49854753	49855752	0.047619	0	0	ENSMUSG00000055447	124.008	287.64	339.608
Cenph	NC_000079.6	100775400	100776399	0.0473373	0	0.017316	ENSMUSG00000045273	2.43301	15.7814	14.5007
Plat	NC_000074.6	22757222	22758221	0.0470588	0	0.012987	ENSMUSG00000031538	103.443	323.653	534.571
Ckap2l	NC_000068.7	129296734	129297733	0.046729	0	0	ENSMUSG00000048327	2.06177	14.2236	18.0742
Rtkn2	NC_000076.6	67979066	67980065	0.151335	0.105263	0.198675	ENSMUSG00000037846	4.05369	0.158663	14.0329
Gabrp	NC_000077.6	33578481	33579480	0.545455	0.5	0.474359	ENSMUSG00000020159	9.91403	16.0246	54.8869
Tmem117	NC_000081.6	94628685	94629684	0.0454545	0	0.0267857	ENSMUSG00000063296	2.81718	7.07448	5.75655
Tomm40	NC_000073.6	19714930	19715929	0.0453074	0	0.00337838	ENSMUSG00000002984	51.6727	100.252	78.7836
Sparc	NC_000077.6	55419581	55420580	0.266667	0.222222	0.393939	ENSMUSG00000018593	89.0086	263.242	279.688
Fam163a	NC_000067.6	156204956	156205955	0.20202	0.157895	0.319672	ENSMUSG00000015484	2.57539	11.9359	13.1239
Zfp239	NC_000072.6	117862577	117863576	0.393617	0.349593	0.13738	ENSMUSG00000042097	1.11125	4.8564	6.83169
Syce2	NC_000074.6	84871611	84872610	0.0833333	0.04	0.0965517	ENSMUSG00000003824	4.41483	14.9425	12.7499
Lin37	NC_000073.6	30559224	30560223	0.130435	0.0873786	0.0670391	ENSMUSG00000036845	8.80909	15.8952	20.8691
Myo1c	NC_000077.6	75650029	75651028	0.842105	0.8	0.727273	ENSMUSG00000017774	79.1137	166.368	161.285
Ncln	NC_000076.6	81496192	81497191	0.0490196	0.008	0.0248963	ENSMUSG00000020238	49.1302	98.4623	79.5744
Acads	NC_000071.6	115118847	115119846	0.0408163	0	0.105263	ENSMUSG00000029545	9.25724	16.4314	20.4686
Tsc22d4	NC_000071.6	137745469	137746468	0.0625	0.0229885	0	ENSMUSG00000029723	19.0044	32.3345	42.7048
Ccnb1	NC_000079.6	100785987	100786986	0.117647	0.0789474	0.0367647	ENSMUSG00000041431	2.36678	14.9572	22.52
Trappc5	NC_000074.6	3675977	3676976	0.0384615	0	0.029703	ENSMUSG00000040236	8.3734	14.1432	15.6342
Anxa10	NC_000074.6	62122694	62123693	0.45	0.411765	0.4	ENSMUSG00000031635	0.486904	1.35748	6.17735
Coro2a	NC_000070.6	46601430	46602429	0.0377358	0	0.00671141	ENSMUSG00000028337	3.16214	9.86664	14.9617
Ddah1	NC_000069.6	145758192	145759191	0.171053	0.133333	0.129032	ENSMUSG00000028194	7.01189	22.1476	28.3027
Mmp3	NC_000075.6	7445322	7446321	0.906977	0.869565	0.836066	ENSMUSG00000043613	0	5.95428	2.18539
Gltp	NC_000071.6	114690436	114691435	0.0373832	0	0.045045	ENSMUSG00000011884	15.7127	29.2687	38.0977
Nbeal2	NC_000075.6	110653662	110654661	0.0362319	0	0.0215827	ENSMUSG00000056724	7.26284	13.8862	17.1696
Syne4	NC_000073.6	30314316	30315315	0.0357143	0	0.0571429	ENSMUSG00000019737	18.0866	30.2438	45.5028
Arhgdib	NC_000072.6	136941400	136942399	0.522727	0.487179	0.506494	ENSMUSG00000030220	1.12999	8.15484	4.04401
Cyp2j9	NC_000070.6	96591220	96592219	0.298851	0.264151	0.395683	ENSMUSG00000015224	2.74426	6.56489	7.75468
Ecm1	NC_000069.6	95739371	95740370	0.851351	0.816667	0.675	ENSMUSG00000028108	14.5841	21.6735	35.2492
Fam135a	NC_000067.6	24099961	24100960	0.0344828	0	0	ENSMUSG00000026153	28.3121	40.3697	51.6735
Wdr60	NC_000078.6	116262567	116263566	0.264	0.22963	0.123077	ENSMUSG00000042050	13.4106	22.2381	23.7429
Cilp	NC_000075.6	65264680	65265679	0.957447	0.923077	0.555556	ENSMUSG00000042254	0.72793	3.21291	3.33196
Clptm1l	NC_000079.6	73603502	73604501	0.0337079	0	0.0130719	ENSMUSG00000021610	34.1836	64.036	63.7615
Egln3	NC_000078.6	54203375	54204374	0.0333333	0	0	ENSMUSG00000035105	17.1215	10.4261	19.5317
Ccdc93	NC_000067.6	121430567	121431566	0.045045	0.0120482	0.0306122	ENSMUSG00000026339	9.23533	9.90214	16.6768
Tmem252	NC_000085.6	24673508	24674507	0.571429	0.538462	0.666667	ENSMUSG00000048572	8.54113	26.0673	20.3674
Slc4a11	NC_000068.7	130697020	130698019	0.0327869	0	0	ENSMUSG00000074796	5.82932	58.2894	56.4692
Arl4c	NC_000067.6	88701692	88702691	0.03125	0	0	ENSMUSG00000049866	14.4782	31.4784	52.3787
Paqr8	NC_000067.6	20890122	20891121	0.0308642	0	0.0895522	ENSMUSG00000025931	3.11728	12.2046	14.0775
Scn8a	NC_000081.6	100869289	100870288	0.453901	0.423077	0.5	ENSMUSG00000023033	5.00577	24.156	27.4504
Myof	NC_000085.6	38043078	38044077	0.0304348	0	0.0186047	ENSMUSG00000048612	62.304	105.953	122.122
Dhx34	NC_000073.6	16221580	16222579	0.15	0.119658	0.0442804	ENSMUSG00000006019	2.96337	4.40101	6.76009
Adgrg7	NC_000082.6	56795522	56796521	0.895349	0.865169	0.752941	ENSMUSG00000022755	0	0.0685635	3.36667
Mrps17	NC_000071.6	129714941	129715940	0.0298507	0	0.032	ENSMUSG00000034211	33.289	47.5264	58.9434
Dhfr	NC_000079.6	92354283	92355282	0.0649351	0.0350877	0	ENSMUSG00000021707	2.49017	3.98298	6.84856
Hacd1	NC_000068.7	14055536	14056535	0.0294118	0	0.008	ENSMUSG00000063275	20.2719	38.8111	46.2927
Tmem9	NC_000067.6	136007719	136008718	0.0458716	0.0166667	0.0595745	ENSMUSG00000026411	29.214	37.5365	52.1465
Dusp7	NC_000075.6	106368110	106369109	0.0285714	0	0.0277778	ENSMUSG00000053716	4.97038	9.80288	15.5884
2310030G06Rik	NC_000075.6	50746022	50747021	0.169492	0.141176	0.0949555	ENSMUSG00000032062	25.7248	39.9404	44.9797
Map3k9	NC_000078.6	81780926	81781925	0.0277778	0	0	ENSMUSG00000042724	15.1738	22.4611	26.0434
Bdkrb2	NC_000078.6	105562672	105563671	0.0510204	0.025	0.0760234	ENSMUSG00000021070	7.68901	17.3958	18.1275
Ing4	NC_000072.6	125039348	125040347	0.025641	0	0	ENSMUSG00000030330	37.0224	64.0569	55.2767
Akr1b8	NC_000072.6	34353664	34354663	0.391304	0.365854	0.505495	ENSMUSG00000029762	52.0238	85.6213	97.0581
Cep170	NC_000067.6	176813678	176814677	0.0253165	0	0	ENSMUSG00000057335	72.1156	147.031	150.149
Lgals3bp	NC_000077.6	118401432	118402431	0.266667	0.241379	0.0714286	ENSMUSG00000033880	102.38	174.26	163.778
Socs2	NC_000076.6	95416754	95417753	0.025	0	0	ENSMUSG00000020027	183.751	336.619	411.242
Dsg3	NC_000084.6	20509774	20510773	0.890625	0.865672	0.849315	ENSMUSG00000056632	0.605069	11.2183	3.07695
Dusp22	NC_000079.6	30659559	30660558	0.0243902	0	0.0614525	ENSMUSG00000069255	6.16092	17.9147	19.0981
Ppif	NC_000080.6	25693652	25694651	0.0241935	0	0.03125	ENSMUSG00000021868	81.3904	118.992	140.312
Muc20	NC_000082.6	32796936	32797935	0.871795	0.847826	0.72	ENSMUSG00000035638	1.26411	1.46802	6.31954
Pex26	NC_000072.6	121183152	121184151	0.022831	0	0.0670732	ENSMUSG00000067825	8.06629	12.7965	16.4033
Iqgap3	NC_000069.6	88081551	88082550	0.0225989	0	0.00588235	ENSMUSG00000028068	4.27722	8.32639	12.1383
Arhgap11a	NC_000068.7	113848162	113849161	0.0223881	0	0.00591716	ENSMUSG00000041219	0.665479	4.54231	8.20629
Cfap52	NC_000077.6	67965433	67966432	0.0217391	0	0.0442804	ENSMUSG00000020904	1.0264	5.48754	2.08554
Vangl1	NC_000069.6	102204518	102205517	0.116667	0.0952381	0.0779221	ENSMUSG00000027860	14.2895	28.4252	33.4515
E2f1	NC_000068.7	154569393	154570392	0.0212766	0	0	ENSMUSG00000027490	2.81763	5.22062	6.14168
Reep2	NC_000084.6	34840089	34841088	0.2	0.179104	0.323944	ENSMUSG00000038555	0.620612	5.15444	4.34455
Serpinb9	NC_000079.6	32996561	32997560	0.354167	0.333333	0.645161	ENSMUSG00000045827	59.1976	130.673	135.924
Pold1	NC_000073.6	44548316	44549315	0.0203488	0	0	ENSMUSG00000038644	7.85632	26.1733	21.3272
Shmt2	NC_000076.6	127521945	127522944	0.0654206	0.0451613	0.0735294	ENSMUSG00000025403	47.7373	89.5618	82.7101
Nab2	NC_000076.6	127666204	127667203	0.019802	0	0	ENSMUSG00000025402	13.2222	22.631	17.218
Cnp	NC_000077.6	100574409	100575408	0.0361446	0.0168067	0.0540541	ENSMUSG00000006782	8.49977	16.4581	14.5904
Mapkapk3	NC_000075.6	107289378	107290377	0.160377	0.141176	0.110048	ENSMUSG00000032577	51.3565	72.7152	91.3998
Tctn1	NC_000071.6	122263993	122264992	0.0842105	0.0655738	0.032967	ENSMUSG00000038593	13.1304	16.2407	25.095
Got2	NC_000074.6	95887866	95888865	0.0185185	0	0.00985222	ENSMUSG00000031672	59.7471	105.971	85.1038
Efna4	NC_000069.6	89337529	89338528	0.0535714	0.0357143	0.0305344	ENSMUSG00000028040	1.30985	4.52076	5.48562
Dpp3	NC_000085.6	4927788	4928787	0.0177515	0	0.0655738	ENSMUSG00000063904	14.8032	40.2512	35.9393
Cnih4	NC_000067.6	181149845	181150844	0.795455	0.777778	0.684211	ENSMUSG00000062169	76.3276	142.105	122.805
Zdhhc13	NC_000073.6	48788503	48789502	0.0175439	0	0.131579	ENSMUSG00000030471	32.0317	72.0021	73.7665
Epha4	NC_000067.6	77514604	77515603	0.0173913	0	0	ENSMUSG00000026235	5.19349	19.6534	23.0369
Hist1h2ae	NC_000079.6	23570721	23571720	0.0173913	0	0	ENSMUSG00000069272	0.87818	3.96911	7.23768
Dcaf17	NC_000068.7	71055242	71056241	0.0162602	0	0	ENSMUSG00000041966	3.95116	6.16594	9.86215
Flt4	NC_000077.6	49609179	49610178	0.016129	0	0.0255319	ENSMUSG00000020357	6.30434	7.44841	11.3017
Ttyh3	NC_000071.6	140648532	140649531	0.015873	0	0.0113636	ENSMUSG00000036565	15.4945	27.4618	29.2799
Nt5c	NC_000077.6	115491376	115492375	0.0314465	0.015625	0.0146628	ENSMUSG00000020736	21.7943	47.8803	53.6216
Rhoj	NC_000078.6	75307813	75308812	0.015625	0	0	ENSMUSG00000046768	58.3457	85.7348	103.529
Ssna1	NC_000068.7	25271919	25272918	0.0155039	0	0	ENSMUSG00000026966	24.3889	47.6748	39.4442
Spc24	NC_000075.6	21759949	21760948	0.0153846	0	0	ENSMUSG00000074476	4.61556	14.6368	21.0475
Tmem98	NC_000077.6	80809915	80810914	0.0153846	0	0.0153846	ENSMUSG00000035413	45.9981	73.5353	86.4139
Immt	NC_000072.6	71830590	71831589	0.0151515	0	0.0967742	ENSMUSG00000052337	59.8863	102.332	93.7384
Gipc2	NC_000069.6	152165401	152166400	0.0148148	0	0	ENSMUSG00000039131	46.1555	80.403	108.108
Slc37a3	NC_000072.6	39377226	39378225	0.10989	0.0952381	0.0566038	ENSMUSG00000029924	60.2554	101.682	126.095
Aplf	NC_000072.6	87671704	87672703	0.0144231	0	0.00892857	ENSMUSG00000030051	3.2417	5.61392	9.63141
Ch25h	NC_000085.6	34474636	34475635	0.0234375	0.00925926	0.018018	ENSMUSG00000050370	1.18623	10.2378	5.94476
Prc1	NC_000073.6	80293951	80294950	0.0140845	0	0.00680272	ENSMUSG00000038943	11.1554	24.2613	40.9082
Dnajc10	NC_000068.7	80314951	80315950	0.0136986	0	0.0152672	ENSMUSG00000027006	30.8193	64.228	69.847
Fam234a	NC_000083.6	26243746	26244745	0.0133333	0	0.0107527	ENSMUSG00000024187	19.3585	43.1276	34.8678
Fblim1	NC_000070.6	141605553	141606552	0.859375	0.846154	0.84127	ENSMUSG00000006219	52.7652	150.458	151.245
Rras	NC_000073.6	45017507	45018506	0.0322581	0.0192308	0	ENSMUSG00000038387	53.1418	100.739	106.87
Sprr2a2	NC_000069.6	92250147	92251146	0.958333	0.945312	0.961165	ENSMUSG00000068893	0.347882	2.92646	53.4223
Pask	NC_000067.6	93342900	93343899	0.0125523	0	0.0365297	ENSMUSG00000026274	1.55939	2.43818	4.32855
Hist1h3c	NC_000079.6	23745022	23746021	0.0251799	0.0127389	0.0647773	ENSMUSG00000069310	1.22361	9.61192	14.0448
Aldh5a1	NC_000079.6	24937162	24938161	0.030303	0.0181818	0.0282486	ENSMUSG00000035936	1.80037	2.94027	4.55103
Nudt18	NC_000080.6	70577337	70578336	0.0119048	0	0	ENSMUSG00000045211	2.80116	6.12724	6.76449
Cenpa	NC_000071.6	30666386	30667385	0.0114943	0	0.0207612	ENSMUSG00000029177	3.87163	14.0537	21.7443
Pigc	NC_000067.6	161968688	161969687	0.010989	0	0	ENSMUSG00000026698	4.7961	6.53966	9.23395
Pgm2l1	NC_000073.6	100226783	100227782	0.155844	0.144928	0.0347003	ENSMUSG00000030729	8.80432	4.34858	10.7122
Gm21596	NC_000068.7	113920059	113921058	0.970874	0.96	0.898305	ENSMUSG00000096006	90.4823	173.238	204.869
Cenpe	NC_000069.6	135212037	135213036	0.0108696	0	0.00884956	ENSMUSG00000045328	0.497472	3.4121	5.04959
Zfp106	NC_000068.7	120563354	120564353	0.0107527	0	0.00677966	ENSMUSG00000027288	130.852	235.298	207.136
Erbb3	NC_000076.6	128589002	128590001	0.0105263	0	0.0114286	ENSMUSG00000018166	29.3532	41.0363	55.4913
Nipal1	NC_000071.6	72647296	72648295	0.0105263	0	0.0760456	ENSMUSG00000067219	5.27553	11.9724	20.8693
Tnfrsf10b	NC_000080.6	69766972	69767971	0.0757576	0.0654206	0.0888889	ENSMUSG00000022074	71.1909	183.592	174.104
Trim23	NC_000079.6	104178274	104179273	0.017094	0.00699301	0.003125	ENSMUSG00000021712	8.60616	13.3479	17.5737
Me1	NC_000075.6	86695415	86696414	0.0517241	0.0416667	0.0344828	ENSMUSG00000032418	106.215	147.343	184.812
Hist1h1e	NC_000079.6	23622059	23623058	0.0470588	0.037037	0	ENSMUSG00000051627	5.77066	17.9751	29.3498
Parpbp	NC_000076.6	88146447	88147446	0.01	0	0.00492611	ENSMUSG00000035365	0.0298578	5.49724	4.52118
Steap2	NC_000071.6	5694069	5695068	0.0227273	0.0128205	0.0192308	ENSMUSG00000015653	18.8093	57.8019	56.9564
Gem	NC_000070.6	11703947	11704946	0.04375	0.0338983	0.0257235	ENSMUSG00000028214	17.4585	34.9959	38.1546
Ick	NC_000075.6	78108692	78109691	0.0361446	0.0263158	0.00721154	ENSMUSG00000009828	13.9753	18.5054	26.4186
Ndor1	NC_000068.7	25254944	25255943	0.00952381	0	0	ENSMUSG00000115074	37.9726	48.7668	35.6536
Grb7	NC_000077.6	98446334	98447333	0.00934579	0	0	ENSMUSG00000019312	21.2868	31.3543	47.494
Nup188	NC_000068.7	30285922	30286921	0.00925926	0	0	ENSMUSG00000052533	55.0389	92.4485	74.9737
Zfp53	NC_000083.6	21488488	21489487	0.0289855	0.019802	0.0603448	ENSMUSG00000057409	4.38271	7.98642	11.5523
Duox2	NC_000068.7	122298243	122299242	0.0272727	0.0183486	0.030888	ENSMUSG00000068452	0.741637	0.600852	12.1233
Rnd2	NC_000077.6	101467838	101468837	0.00869565	0	0	ENSMUSG00000001313	7.68775	17.3053	25.4252
Foxq1	NC_000079.6	31557670	31558669	0.00862069	0	0.00298507	ENSMUSG00000038415	7.26805	9.25478	15.0191
Gemin6	NC_000083.6	80207181	80208180	0.0547945	0.0462428	0.0957447	ENSMUSG00000055760	2.86211	10.3138	8.6201
Smc2	NC_000070.6	52438721	52439720	0.00833333	0	0.00165837	ENSMUSG00000028312	8.28021	43.0803	48.8176
Golga1	NC_000068.7	39065082	39066081	0.00787402	0	0.0102041	ENSMUSG00000026754	5.69782	5.65694	13.1129
Orai2	NC_000071.6	136170157	136171156	0.00740741	0	0	ENSMUSG00000039747	8.11939	13.495	15.1309
Calm3	NC_000073.6	16923533	16924532	0.00735294	0	0	ENSMUSG00000019370	33.0111	74.828	67.8702
Serpinb1a	NC_000079.6	32850686	32851685	0.597015	0.589744	0.509091	ENSMUSG00000044734	43.8276	42.4372	112.589
Zscan22	NC_000073.6	12897309	12898308	0.0070922	0	0.0687023	ENSMUSG00000054715	6.95211	9.193	15.9783
Net1	NC_000079.6	3917721	3918720	0.184397	0.177419	0.165094	ENSMUSG00000021215	133.462	260.496	279.664
Idh1	NC_000067.6	65185980	65186979	0.00666667	0	0	ENSMUSG00000025950	33.3816	81.5381	99.8964
Mcm4	NC_000082.6	15636901	15637900	0.00662252	0	0	ENSMUSG00000022673	9.10795	33.9304	33.1006
Dph5	NC_000069.6	115887665	115888664	0.00634921	0	0	ENSMUSG00000033554	28.9487	53.2383	43.6406
Chd7	NC_000070.6	8689906	8690905	0.00632911	0	0	ENSMUSG00000041235	21.6082	42.7719	48.006
Fam43a	NC_000082.6	30599223	30600222	0.028777	0.0225564	0.0142857	ENSMUSG00000046546	1.67471	2.97553	5.27595
BC048403	NC_000076.6	121739106	121740105	0.481481	0.47541	0.263473	ENSMUSG00000053684	1.86895	5.9985	6.62903
Trappc3	NC_000070.6	126261905	126262904	0.0225564	0.0165289	0.015625	ENSMUSG00000028847	27.7055	42.541	47.864
Trip13	NC_000079.6	73937311	73938310	0.0058997	0	0.0588235	ENSMUSG00000021569	1.12994	3.88667	6.33882
Fgf21	NC_000073.6	45618851	45619850	0.95	0.944444	0.948571	ENSMUSG00000030827	0.133555	2.25814	3.32429
Tmem79	NC_000069.6	88333934	88334933	0.344444	0.338983	0.263158	ENSMUSG00000001420	4.94424	17.9765	10.0233
Adgrg1	NC_000074.6	94974256	94975255	0.0454545	0.04	0.196078	ENSMUSG00000031785	233.686	398.67	399.934
Hist1h3f	NC_000079.6	23543552	23544551	0.0178571	0.0129032	0.0139535	ENSMUSG00000100210	6.09634	27.8924	39.2803
Rell2	NC_000084.6	37954584	37955583	0.00478469	0	0	ENSMUSG00000044024	5.3417	15.1555	12.339
Rnaseh2a	NC_000074.6	84968876	84969875	0.00454546	0	0	ENSMUSG00000052926	18.5986	39.449	41.5396
Nubp2	NC_000083.6	24885904	24886903	0.00452489	0	0.00395257	ENSMUSG00000039183	19.1498	33.902	29.0984
Stil	NC_000070.6	114999608	115000607	0.00444444	0	0.00869565	ENSMUSG00000028718	1.72541	6.40714	10.3908
Spint2	NC_000073.6	29281567	29282566	0.0314136	0.027027	0.0387097	ENSMUSG00000074227	442.502	689.625	807.365
Kctd11	NC_000077.6	69880486	69881485	0.004329	0	0	ENSMUSG00000046731	4.70271	10.9868	9.58178
Cdca8	NC_000070.6	124936418	124937417	0.004329	0	0.026738	ENSMUSG00000028873	1.06043	12.0233	14.1419
Cks1b	NC_000069.6	89417792	89418791	0.00423729	0	0	ENSMUSG00000028044	34.6818	83.6851	85.9243
Cdca3	NC_000072.6	124829006	124830005	0.00390625	0	0.00242718	ENSMUSG00000023505	3.30193	13.4254	25.0921
Nup155	NC_000081.6	8108756	8109755	0.00390625	0	0.0471204	ENSMUSG00000022142	18.7296	31.1641	24.382
Tmem147	NC_000073.6	30729035	30730034	0.00384615	0	0	ENSMUSG00000006315	61.0028	89.695	106.54
Chek1	NC_000075.6	36726159	36727158	0.00381679	0	0	ENSMUSG00000032113	1.63141	9.43775	11.847
Zdhhc21	NC_000070.6	82859445	82860444	0.876404	0.873016	0.193237	ENSMUSG00000028403	21.5003	31.4193	40.1105
Msrb1	NC_000083.6	24736142	24737141	0.104418	0.101124	0.00512821	ENSMUSG00000075705	1.46726	18.8011	13.5182
C130074G19Rik	NC_000067.6	184882537	184883536	0.0909091	0.0876289	0.142857	ENSMUSG00000039349	3.09904	4.61754	11.1571
Endod1	NC_000075.6	14380743	14381742	0.0322581	0.0289855	0.027933	ENSMUSG00000037419	15.3606	36.9063	42.2897
Edn1	NC_000079.6	42300976	42301975	0.0218341	0.0186916	0.00826446	ENSMUSG00000021367	39.1706	63.2794	70.9822
3110082I17Rik	NC_000071.6	139460035	139461034	0.00293255	0	0.00510204	ENSMUSG00000053553	12.1832	24.5576	18.7236
Pgls	NC_000074.6	71591684	71592683	0.00247525	0	0.00571429	ENSMUSG00000031807	11.6832	29.952	39.5666
Zbtb38	NC_000075.6	96731176	96732175	0.877301	0.876543	0.834677	ENSMUSG00000040433	23.2843	47.1952	42.9869
Stxbp3	NC_000069.6	108840003	108841002	0.235294	0.234568	0.131687	ENSMUSG00000027882	30.3153	55.2093	52.7205
Ly6d	NC_000081.6	74763068	74764067	0.836364	0.835821	0.888889	ENSMUSG00000034634	1.10807	20.4436	142.686
Map9	NC_000069.6	82357531	82358530	0.0134228	0.0131579	0	ENSMUSG00000033900	2.80747	8.20678	3.40513

## Sheet: 9. Up genes WBGS gain
geneID	chr	start	end	mCG_T0_TSS500	mCG_D3_DDC_TSS500	mCG_D5_DDC_TSS500	target_id	T0_tpm_n2	D3_DDC_tpm_n2	D5_DDC_tpm_n2
Lama3	NC_000084.6	12333218	12334217	0.192982	0.875	0.1125	ENSMUSG00000024421	9.43455	5.22736	10.7791
Stk38l	NC_000072.6	146724430	146725429	0.319672	1	0.3	ENSMUSG00000001630	28.6504	51.078	55.3747
Mxra7	NC_000077.6	116827569	116828568	0.125	0.761905	0.105769	ENSMUSG00000020814	3.62051	11.2692	14.7753
Ehbp1l1	NC_000085.6	5725962	5726961	0.0582524	0.6875	0.613636	ENSMUSG00000024937	4.41487	8.95665	8.73681
Sctr	NC_000067.6	120006399	120007398	0.385542	1	0.508475	ENSMUSG00000026387	5.19139	15.3293	13.2893
Pla2g7	NC_000083.6	43567581	43568580	0.205405	0.782609	0.197279	ENSMUSG00000023913	0.437279	6.21897	1.89927
Alpl	NC_000070.6	137795885	137796884	0.333333	0.888889	0.120968	ENSMUSG00000028766	6.27272	26.4937	16.7265
Lcn2	NC_000068.7	32387240	32388239	0	0.555556	0.565217	ENSMUSG00000026822	3039.8	6715.2	7465.35
Limd2	NC_000077.6	106160531	106161530	0.0909091	0.625	0.173554	ENSMUSG00000040699	25.8236	43.89	52.2644
Cfap69	NC_000071.6	5663757	5664756	0.091954	0.625	0.131783	ENSMUSG00000040473	9.84151	6.48855	22.2578
Vopp1	NC_000072.6	57824875	57825874	0.125	0.65	0.0952381	ENSMUSG00000037788	18.32	21.8262	32.986
Tmprss4	NC_000075.6	45203620	45204619	0.5	1	0.782609	ENSMUSG00000032091	0.918042	2.01475	6.50932
Bmp8b	NC_000070.6	123103807	123104806	0.299213	0.785714	0.432624	ENSMUSG00000002384	8.91302	16.8151	17.0706
Slc41a3	NC_000072.6	90604229	90605228	0.0515464	0.533333	0.120805	ENSMUSG00000030089	1.09741	3.33288	3.70888
Shisa4	NC_000067.6	135374779	135375778	0.27027	0.75	0.323529	ENSMUSG00000041889	12.1204	27.7079	28.8538
Vcan	NC_000079.6	89742195	89743194	0.321839	0.8	0.330275	ENSMUSG00000021614	1.87126	7.56196	2.17809
Itpripl2	NC_000073.6	118491476	118492475	0.0274725	0.5	0.25	ENSMUSG00000095115	4.23393	6.56693	14.193
Ly75	NC_000068.7	60382732	60383731	0.0285714	0.5	0.0869565	ENSMUSG00000026980	6.08203	12.0486	13.1957
Fam57a	NC_000077.6	76201526	76202525	0.232558	0.676471	0.153374	ENSMUSG00000069808	4.92978	11.3722	10.2207
Spopl	NC_000068.7	23571630	23572629	0.211765	0.641026	0.258333	ENSMUSG00000026771	12.2584	15.4607	29.2621
Ltbp2	NC_000078.6	84876771	84877770	0.57265	1	0.338889	ENSMUSG00000002020	0.977112	16.6199	13.1153
Knstrn	NC_000068.7	118813488	118814487	0.469697	0.896552	0.183784	ENSMUSG00000027331	1.92711	10.5634	18.3521
Anxa3	NC_000071.6	96792885	96793884	0.104167	0.521739	0.235294	ENSMUSG00000029484	491.559	1099.07	1128.26
Akap2	NC_000070.6	57844748	57845747	0.322581	0.7	0.615385	ENSMUSG00000038729	5.79755	16.0044	19.115
Nppb	NC_000070.6	147985273	147986272	0.0677966	0.444444	0.263636	ENSMUSG00000029019	0	9.62248	7.84448
Atp8b1	NC_000084.6	64661359	64662358	0.510204	0.885246	0.420875	ENSMUSG00000039529	20.9093	34.5416	45.4305
Csf2rb2	NC_000081.6	78305222	78306221	0.609756	0.972973	0.791667	ENSMUSG00000071714	1.72308	11.2101	9.55668
Ptprs	NC_000083.6	56475981	56476980	0.4375	0.794118	0.5	ENSMUSG00000013236	103.785	153.467	200.656
Tmsb10	NC_000072.6	72958249	72959248	0.0357143	0.380952	0.545455	ENSMUSG00000079523	243.909	350.708	446.285
Inf2	NC_000078.6	112588245	112589244	0	0.342857	0.107345	ENSMUSG00000037679	8.75643	17.3753	19.7692
Prss22	NC_000083.6	24000237	24001236	0.162162	0.5	0.181818	ENSMUSG00000045027	5.96124	70.0076	91.7019
Mfhas1	NC_000074.6	35587298	35588297	0.107143	0.444444	0.178571	ENSMUSG00000070056	3.32849	9.49509	10.017
Arhgef1	NC_000073.6	24902417	24903416	0.416667	0.75	0.107692	ENSMUSG00000040940	40.4578	71.9206	63.7813
Mme	NC_000069.6	63294724	63295723	0.0657895	0.387097	0.22314	ENSMUSG00000027820	58.1178	23.8601	46.9928
Tlr3	NC_000074.6	45411450	45412449	0.619048	0.933333	0.391304	ENSMUSG00000031639	11.0959	29.5231	17.6171
Col18a1	NC_000076.6	77166031	77167030	0.180723	0.485714	0.141479	ENSMUSG00000001435	107.935	254.898	222.782
Gsta1	NC_000075.6	78230169	78231168	0.2	0.5	0.153846	ENSMUSG00000074183	0.942842	21.5516	27.5165
1500011B03Rik	NC_000071.6	114813477	114814476	0.0848214	0.384615	0.0542636	ENSMUSG00000072694	5.13029	14.3653	23.7688
Slc25a46	NC_000084.6	31609403	31610402	0.375	0.666667	0.160714	ENSMUSG00000024259	6.32776	13.3598	10.8804
Itgb4	NC_000077.6	115974225	115975224	0.25	0.530612	0.542254	ENSMUSG00000020758	44.8957	84.0569	91.5411
Gtf2ird1	NC_000071.6	134456217	134457216	0.0888889	0.363636	0.133929	ENSMUSG00000023079	70.7037	122.919	116.22
Ampd3	NC_000073.6	110767430	110768429	0.314815	0.588235	0.132743	ENSMUSG00000005686	10.981	22.6845	27.0245
Pcgf2	NC_000077.6	97700849	97701848	0.33758	0.610526	0.518868	ENSMUSG00000018537	10.5073	20.9125	22.0675
Pex2	NC_000069.6	5576040	5577039	0.0921053	0.357143	0.0961538	ENSMUSG00000040374	12.6937	25.9353	26.0316
Mllt11	NC_000069.6	95231698	95232697	0.357143	0.619048	0.575758	ENSMUSG00000053192	2.2115	13.5902	18.5215
Qsox2	NC_000068.7	26236900	26237899	0.0645161	0.325581	0.457143	ENSMUSG00000036327	5.55124	13.8057	9.39634
Slc29a4	NC_000071.6	142691978	142692977	0.57971	0.837209	0.539474	ENSMUSG00000050822	0.619409	3.83155	5.01025
Dph6	NC_000068.7	114654555	114655554	0.0776699	0.333333	0.0652174	ENSMUSG00000057147	17.6322	28.4668	24.0377
Frmd8	NC_000085.6	5874774	5875773	0.545455	0.8	0.0909091	ENSMUSG00000024816	12.5279	37.6893	42.3627
Runx1	NC_000082.6	92825575	92826574	0.590909	0.84375	0.905405	ENSMUSG00000022952	13.7714	25.1716	34.2997
Cacnb3	NC_000081.6	98627930	98628929	0.538462	0.789474	0.625	ENSMUSG00000003352	2.78408	4.02856	8.05446
Adgb	NC_000076.6	10474646	10475645	0.75	1	0.888889	ENSMUSG00000050994	4.0642	9.6903	9.76127
Cotl1	NC_000074.6	119840080	119841079	0	0.25	0	ENSMUSG00000031827	30.0179	58.6972	79.1098
Sh3bgrl3	NC_000070.6	134128254	134129253	0	0.25	0	ENSMUSG00000028843	92.2792	674.611	185.708
Ap1g2	NC_000080.6	55106476	55107475	0	0.25	0.596491	ENSMUSG00000040701	11.3395	21.1903	21.8206
Cd151	NC_000073.6	141466862	141467861	0.13	0.375	0.0899471	ENSMUSG00000025510	224.09	384.447	358.256
Bcl2a1d	NC_000075.6	88731351	88732350	0.657303	0.901961	0.789474	ENSMUSG00000099974	0.351892	1.24507	7.69411
Rin3	NC_000078.6	102282329	102283328	0.0340426	0.272727	0.104348	ENSMUSG00000044456	21.1537	43.1297	36.8404
Serpina7	NC_000086.7	139084771	139085770	0.35	0.588235	0.566667	ENSMUSG00000031271	0.788682	7.06567	8.03627
Ranbp17	NC_000077.6	33513640	33514639	0.661972	0.9	0.661765	ENSMUSG00000040594	2.86562	4.84075	7.7672
Serpina3n	NC_000078.6	104406198	104407197	0.264706	0.5	0.3125	ENSMUSG00000021091	0.342479	21.8463	12.3086
Lama4	NC_000076.6	38965015	38966014	0.0153846	0.25	0.0754717	ENSMUSG00000019846	28.8227	58.6618	54.9109
Krba1	NC_000072.6	48395086	48396085	0	0.233333	0.0944444	ENSMUSG00000042810	8.75307	12.427	15.9724
Ttll1	NC_000081.6	83518420	83519419	0.574468	0.8	0.54918	ENSMUSG00000022442	3.5955	7.76464	8.2324
Mms22l	NC_000070.6	24495724	24496723	0.0588235	0.27907	0.121212	ENSMUSG00000045751	1.927	10.821	10.2924
Tbc1d2	NC_000070.6	46650381	46651380	0.191489	0.40404	0.172775	ENSMUSG00000039813	3.74367	4.2895	8.02468
Madcam1	NC_000076.6	79663894	79664893	0.666667	0.875	0.6875	ENSMUSG00000020310	0	1.59956	3.64253
Slc36a4	NC_000075.6	15709017	15710016	0.0416667	0.25	0.0967742	ENSMUSG00000043885	7.40689	20.6395	15.5894
Gas7	NC_000077.6	67454524	67455523	0.140187	0.34375	0.161491	ENSMUSG00000033066	1.83717	5.36228	7.18711
Tmem176b	NC_000072.6	48845450	48846449	0.736842	0.9375	0.846154	ENSMUSG00000029810	405.731	752.543	863.743
Plcg2	NC_000074.6	117497775	117498774	0.194118	0.393939	0.188976	ENSMUSG00000034330	3.68663	9.03642	14.0898
Dtl	NC_000067.6	191575045	191576044	0	0.19708	0	ENSMUSG00000037474	3.03942	5.61937	6.49638
Wdr81	NC_000077.6	75454218	75455217	0	0.194444	0	ENSMUSG00000045374	2.60187	3.66809	5.59775
Capn1	NC_000085.6	6015326	6016325	0.0420168	0.235294	0.205607	ENSMUSG00000024942	15.359	33.5403	27.4946
Cenpm	NC_000081.6	82244273	82245272	0.0594059	0.25	0.0833333	ENSMUSG00000068101	1.56151	8.1164	8.68207
Ticrr	NC_000073.6	79659696	79660695	0	0.1875	0.0560748	ENSMUSG00000046591	0.586564	1.57624	5.26347
Clec4e	NC_000072.6	123289372	123290371	0.54902	0.733333	0.775	ENSMUSG00000030142	0.803352	13.8399	10.4138
Plec	NC_000081.6	76230879	76231878	0.29927	0.483333	0.289256	ENSMUSG00000022565	147.983	221.466	262.896
Igsf8	NC_000067.6	172311867	172312866	0	0.181818	0.0714286	ENSMUSG00000038034	31.0489	60.2276	55.2987
P2rx2	NC_000071.6	110342950	110343949	0.4	0.579545	0.42439	ENSMUSG00000029503	0.356343	6.04811	7.16419
Nt5c1a	NC_000070.6	123200704	123201703	0.0722892	0.25	0.0142857	ENSMUSG00000054958	1.10935	4.95793	13.8066
Fcer1g	NC_000067.6	171233850	171234849	0.823529	1	0.792683	ENSMUSG00000058715	0.973655	7.33018	8.51504
Adgrv1	NC_000079.6	81632889	81633888	0.339623	0.512821	0.203704	ENSMUSG00000069170	6.55846	11.7641	9.30741
Pkmyt1	NC_000083.6	23725836	23726835	0.0518519	0.22449	0.0833333	ENSMUSG00000023908	12.2478	37.5232	33.1467
Col6a2	NC_000076.6	76623126	76624125	0.204082	0.375	0.28	ENSMUSG00000020241	2.20719	7.03787	7.66481
Anxa8	NC_000080.6	34085479	34086478	0.619048	0.788462	0.442478	ENSMUSG00000021950	1.16166	1.93961	4.913
Taldo1	NC_000073.6	141391660	141392659	0.00833333	0.175	0	ENSMUSG00000025503	118.736	211.999	219.381
Hp	NC_000074.6	109578673	109579672	0.318182	0.483871	0.333333	ENSMUSG00000031722	9.74625	15.8358	29.0153
Trim16	NC_000077.6	62819691	62820690	0.030303	0.195652	0	ENSMUSG00000047821	20.0409	34.4917	55.8048
Ttf2	NC_000069.6	100969226	100970225	0.161017	0.326087	0.119565	ENSMUSG00000033222	1.00569	2.9352	4.78678
Rfc1	NC_000071.6	65335978	65336977	0.0869565	0.25	0.175439	ENSMUSG00000029191	10.3009	17.583	15.7156
Spcs3	NC_000074.6	54530252	54531251	0.103226	0.265306	0.148148	ENSMUSG00000054408	15.8244	32.8477	33.8707
Cmtm3	NC_000074.6	104338883	104339882	0.526316	0.6875	0.461538	ENSMUSG00000031875	37.302	65.0015	79.6875
Egfr	NC_000077.6	16751703	16752702	0.0487805	0.209677	0.17	ENSMUSG00000020122	41.2585	53.7599	77.6004
Plac8	NC_000071.6	100571752	100572751	0.432432	0.590909	0.452381	ENSMUSG00000029322	11.5237	19.464	29.2403
Adam8	NC_000073.6	139992622	139993621	0.733333	0.888889	0.9	ENSMUSG00000025473	2.03471	34.8419	44.8456
Cdk1	NC_000076.6	69352413	69353412	0.0113636	0.166667	0	ENSMUSG00000019942	1.47021	20.3102	40.9317
Il1rn	NC_000068.7	24336360	24337359	0.473684	0.627907	0.277778	ENSMUSG00000026981	148.444	1802.76	2376.79
Rhbdl2	NC_000070.6	123787375	123788374	0.109091	0.263158	0.220779	ENSMUSG00000043333	4.62743	14.7695	19.8719
Pea15a	NC_000067.6	172206282	172207281	0.0606061	0.214286	0.166667	ENSMUSG00000013698	139.067	275.281	281.3
Akr1c13	NC_000079.6	4190666	4191665	0.522727	0.673913	0.460317	ENSMUSG00000021213	0.886185	10.3999	6.43057
Wisp2	NC_000068.7	163820252	163821251	0.6	0.75	0.583333	ENSMUSG00000027656	0.224523	3.79026	2.07809
Fam53a	NC_000071.6	33629142	33630141	0	0.148148	0.0512821	ENSMUSG00000037339	6.48431	13.1128	15.0309
Csf2rb	NC_000081.6	78325298	78326297	0.74359	0.888889	0.685185	ENSMUSG00000071713	1.62769	6.17585	6.67541
Lgals1	NC_000081.6	78926225	78927224	0	0.142857	0.0512821	ENSMUSG00000068220	99.2986	338.069	270.544
Tnfaip8l1	NC_000083.6	56161991	56162990	0.175	0.3125	0.038674	ENSMUSG00000044469	3.68459	6.48335	11.026
Ergic1	NC_000083.6	26560262	26561261	0.223684	0.357143	0.411215	ENSMUSG00000001576	107.757	193.598	170.685
Bik	NC_000081.6	83526289	83527288	0.0350877	0.166667	0	ENSMUSG00000016758	8.62247	17.075	31.0233
Cyp20a1	NC_000067.6	60342800	60343799	0.0508475	0.181818	0.0161725	ENSMUSG00000049439	16.6633	28.6239	24.0701
Bspry	NC_000070.6	62479504	62480503	0.369565	0.5	0.137931	ENSMUSG00000028392	41.4993	96.2924	134.586
Gpx3	NC_000077.6	54902354	54903353	0.430556	0.558824	0.156398	ENSMUSG00000018339	28.2565	59.4498	37.8733
Tmem29	NC_000086.7	150466832	150467831	0.87234	1	0.884615	ENSMUSG00000041353	11.6786	14.9806	26.3886
Sorbs3	NC_000080.6	70213432	70214431	0.873016	1	0.975	ENSMUSG00000022091	16.9649	38.2351	33.6707
Adgre5	NC_000074.6	83740812	83741811	0.0408163	0.166667	0.214286	ENSMUSG00000002885	44.7268	92.0173	73.5459
Fkbp11	NC_000081.6	98727699	98728698	0.229508	0.354839	0.344086	ENSMUSG00000003355	5.2943	7.22846	11.8866
Tmem14c	NC_000079.6	41015750	41016749	0.00383142	0.129032	0.0433213	ENSMUSG00000021361	29.8449	65.3375	61.8272
Pdcl3	NC_000067.6	38987314	38988313	0	0.125	0	ENSMUSG00000026078	58.9719	154.708	140.719
Stmn1	NC_000070.6	134467820	134468819	0	0.125	0	ENSMUSG00000028832	84.1156	155.502	192.595
Tirap	NC_000075.6	35199792	35200791	0.0446735	0.169231	0.166667	ENSMUSG00000032041	13.7601	22.2129	24.9559
Tfpi	NC_000068.7	84476334	84477333	0.830986	0.954545	0.8	ENSMUSG00000027082	5.8432	16.7244	5.60847
2200002D01Rik	NC_000073.6	29247968	29248967	0	0.123077	0.054878	ENSMUSG00000030587	17.6455	24.5931	33.5117
Gpx2	NC_000078.6	76795055	76796054	0.598214	0.71875	0.638095	ENSMUSG00000042808	31.9592	80.6868	134.069
S100a6	NC_000069.6	90612394	90613393	0.0914634	0.211538	0.0948276	ENSMUSG00000001025	105.611	740.134	823.961
Inhba	NC_000079.6	16007243	16008242	0.689655	0.809524	0.787234	ENSMUSG00000041324	122.258	306.723	315.496
Mmp7	NC_000075.6	7691590	7692589	0.297619	0.416667	0.481132	ENSMUSG00000018623	8.15821	265.255	399.197
Hpx	NC_000073.6	105599617	105600616	0.543103	0.661538	0.539062	ENSMUSG00000030895	9.30678	35.0883	27.8653
Camk2a	NC_000084.6	60925077	60926076	0.395833	0.513514	0.462963	ENSMUSG00000024617	3.09413	10.9997	10.2708
Hyal2	NC_000075.6	107567386	107568385	0	0.117647	0.0363636	ENSMUSG00000010047	7.07549	28.5093	32.4514
Slc35b4	NC_000072.6	34176578	34177577	0.0703125	0.1875	0.0501792	ENSMUSG00000018999	3.49324	11.3053	11.8365
Srd5a1	NC_000079.6	69611408	69612407	0	0.116883	0	ENSMUSG00000021594	1.68617	3.69494	7.21483
Ppm1j	NC_000069.6	104780556	104781555	0.0285714	0.145455	0.035461	ENSMUSG00000002228	0.582775	7.87545	7.81253
Mgp	NC_000072.6	136875306	136876305	0.634146	0.75	0.680851	ENSMUSG00000030218	12.4055	156.666	93.411
Ptafr	NC_000070.6	132563567	132564566	0.653846	0.769231	0.810811	ENSMUSG00000056529	1.21206	5.11618	2.47891
Prdx3	NC_000085.6	60874039	60875038	0.027027	0.139344	0.05	ENSMUSG00000024997	25.6962	47.2039	42.3169
Ano9	NC_000073.6	141117307	141118306	0.387755	0.5	0.338983	ENSMUSG00000054662	7.46813	15.0644	19.8071
Cpe	NC_000074.6	64692610	64693609	0.185185	0.296296	0.0545455	ENSMUSG00000037852	1.09437	29.6395	18.1858
Abcc4	NC_000080.6	118706190	118707189	0.235632	0.344828	0.0855856	ENSMUSG00000032849	33.4312	43.0429	63.5203
Pigo	NC_000070.6	43027197	43028196	0.852113	0.960526	0.894737	ENSMUSG00000028454	15.7857	30.7174	18.579
Hgsnat	NC_000074.6	25976245	25977244	0.0123457	0.12069	0.11236	ENSMUSG00000037260	24.2091	50.6047	51.7212
Il1b	NC_000068.7	129370671	129371670	0.847222	0.954545	0.821429	ENSMUSG00000027398	1.76544	8.61557	11.9069
Prim1	NC_000076.6	128014715	128015714	0.135135	0.241935	0.141176	ENSMUSG00000025395	6.6042	14.6675	16.185
Ereg	NC_000071.6	91074117	91075116	0.147651	0.254237	0.0595238	ENSMUSG00000029377	1.03078	6.25021	2.82323
Ddi1	NC_000075.6	6266048	6267047	0.84375	0.95	0.877193	ENSMUSG00000047619	4.09363	1.85096	4.32625
Stard3	NC_000077.6	98357867	98358866	0.0120482	0.117647	0.019305	ENSMUSG00000018167	15.0704	29.1032	34.8038
Zmat3	NC_000069.6	32365166	32366165	0	0.105263	0.0128205	ENSMUSG00000027663	3.82803	5.11152	9.10499
Acox2	NC_000080.6	8258520	8259519	0.341463	0.444444	0.311111	ENSMUSG00000021751	13.9503	27.1256	31.8482
Gpnmb	NC_000072.6	49036018	49037017	0.45625	0.558824	0.537736	ENSMUSG00000029816	1.52163	3.45545	5.45242
Aldh3b1	NC_000085.6	3930361	3931360	0.847826	0.95	0.814286	ENSMUSG00000024885	2.84939	6.19425	7.05112
Plekho2	NC_000075.6	65579588	65580587	0	0.102041	0.09375	ENSMUSG00000050721	3.01392	7.26572	9.22793
Pank2	NC_000068.7	131261510	131262509	0.0243902	0.125	0.0833333	ENSMUSG00000037514	14.7766	21.6555	27.3834
Krt20	NC_000077.6	99437654	99438653	0.623932	0.724138	0.622951	ENSMUSG00000035775	4.18898	9.82162	20.2411
Psmd13	NC_000073.6	140881894	140882893	0	0.1	0.00199203	ENSMUSG00000025487	59.0931	100.231	92.2722
Itgav	NC_000068.7	83723608	83724607	0.0806452	0.179487	0.075	ENSMUSG00000027087	254.746	397.589	491.863
Pxdn	NC_000078.6	29937456	29938455	0.354167	0.452381	0.434783	ENSMUSG00000020674	11.6928	24.5324	39.7457
Xirp2	NC_000068.7	67445500	67446499	0.617647	0.714286	0.753086	ENSMUSG00000027022	0.479548	7.12866	1.84515
Lyz2	NC_000076.6	117281773	117282772	0.553571	0.65	0.578125	ENSMUSG00000069516	6.71814	34.6037	43.3756
Postn	NC_000069.6	54358772	54359771	0.515873	0.611765	0.507576	ENSMUSG00000027750	0.938056	3.52261	4.80912
Esd	NC_000080.6	74731797	74732796	0	0.0952381	0.00735294	ENSMUSG00000021996	165.514	309.881	268.215
Incenp	NC_000085.6	9899047	9900046	0	0.0952381	0	ENSMUSG00000024660	2.51113	6.52254	9.15488
4930452B06Rik	NC_000080.6	8665998	8666997	0.208955	0.303571	0.288136	ENSMUSG00000021747	1.63673	5.24723	4.14755
Vps18	NC_000068.7	119288242	119289241	0	0.0930233	0.00555556	ENSMUSG00000034216	10.4493	19.3525	24.3603
Cyp24a1	NC_000068.7	170496646	170497645	0.0428571	0.134146	0.0377358	ENSMUSG00000038567	0.522033	6.26068	6.61972
Tpcn1	NC_000071.6	120588199	120589198	0	0.0909091	0.0166667	ENSMUSG00000032741	7.74923	12.022	18.3373
Racgap1	NC_000081.6	99651157	99652156	0.228395	0.319149	0.333333	ENSMUSG00000023015	3.00461	22.5729	28.3405
Muc4	NC_000082.6	32735386	32736385	0.833333	0.923077	0.857143	ENSMUSG00000079620	0.403303	0.284786	9.05871
Alox5	NC_000072.6	116460679	116461678	0.364865	0.454545	0.143617	ENSMUSG00000025701	0.117051	0.126936	3.61954
Iars2	NC_000067.6	185328917	185329916	0	0.0869565	0.25	ENSMUSG00000026618	17.8753	33.9522	29.0592
Slc17a5	NC_000075.6	78587546	78588545	0.108911	0.195652	0.0388889	ENSMUSG00000049624	5.33158	9.76317	10.5402
Fbln2	NC_000072.6	91212264	91213263	0.0684211	0.153846	0.047619	ENSMUSG00000064080	53.4484	172.612	133.94
Galk1	NC_000077.6	116012220	116013219	0.103093	0.1875	0.0703125	ENSMUSG00000020766	34.8817	61.8043	43.752
Cd83	NC_000079.6	43784612	43785611	0.166667	0.25	0.0769231	ENSMUSG00000015396	4.92336	7.83282	9.93095
Alg8	NC_000073.6	97371094	97372093	0.00431035	0.0869565	0.00526316	ENSMUSG00000035704	6.9447	21.3154	25.784
Sftpd	NC_000080.6	41184699	41185698	0.441176	0.52381	0.672727	ENSMUSG00000021795	55.0591	119.745	219.805
Erbb2	NC_000077.6	98411984	98412983	0.108434	0.190476	0.178571	ENSMUSG00000062312	23.3933	38.8547	40.779
Asz1	NC_000072.6	18108562	18109561	0.887324	0.969298	0.950704	ENSMUSG00000010796	3.03277	22.1757	37.878
Pls1	NC_000075.6	95844807	95845806	0.00934579	0.0869565	0.0201005	ENSMUSG00000049493	8.62382	14.4211	39.6645
Acp6	NC_000069.6	97158251	97159250	0	0.0769231	0.00454546	ENSMUSG00000028093	21.6451	37.9541	35.0649
Ctsf	NC_000085.6	4854629	4855628	0	0.0769231	0.0174216	ENSMUSG00000083282	12.7684	2.61775	9.7819
Slc36a1	NC_000077.6	55203820	55204819	0	0.0769231	0.00534759	ENSMUSG00000020261	0.944493	3.83842	4.43283
Crym	NC_000073.6	120201489	120202488	0.466667	0.543478	0.538462	ENSMUSG00000030905	2.37515	6.31707	5.30958
Gjb4	NC_000070.6	127353640	127354639	0.409091	0.484848	0.672131	ENSMUSG00000046623	10.1153	111.132	170.142
Aspscr1	NC_000077.6	120671939	120672938	0.366667	0.442308	0.62	ENSMUSG00000025142	26.3781	62.441	81.4572
Cyp4a31	NC_000070.6	115563126	115564125	0.258065	0.333333	0.478261	ENSMUSG00000028712	2.72306	7.89634	5.54712
Megf8	NC_000073.6	25316236	25317235	0.00409836	0.0789474	0.0896861	ENSMUSG00000045039	9.40934	15.6886	14.2359
Syk	NC_000079.6	52581829	52582828	0.793103	0.866667	0.752212	ENSMUSG00000021457	0.819324	4.39836	3.9293
Dmbt1	NC_000073.6	131031560	131032559	0.635659	0.707071	0.566667	ENSMUSG00000047517	34.0184	39.0061	650.329
Acp1	NC_000078.6	30911125	30912124	0.00434783	0.075	0.0151515	ENSMUSG00000044573	20.6701	46.9008	51.3046
Gpx8	NC_000079.6	113045929	113046928	0.125561	0.195804	0.173709	ENSMUSG00000021760	0.893965	1.45236	5.70388
Fam96a	NC_000075.6	66126111	66127110	0.0932836	0.163462	0.0619946	ENSMUSG00000032381	11.5874	34.0833	31.0118
Anln	NC_000075.6	22389234	22390233	0.423529	0.493671	0.377049	ENSMUSG00000036777	1.08891	8.42403	11.4883
Impact	NC_000084.6	12962442	12963441	0.906977	0.97619	0.91954	ENSMUSG00000024423	11.2087	20.411	14.6766
Hagh	NC_000083.6	24839579	24840578	0.709091	0.777778	0.697368	ENSMUSG00000024158	53.3945	110.505	121.597
Gpr155	NC_000068.7	73386352	73387351	0.431818	0.5	0.487179	ENSMUSG00000041762	1.76796	9.49827	7.2449
Dscc1	NC_000081.6	55090696	55091695	0.254054	0.321839	0.25	ENSMUSG00000022422	0.965687	2.74308	5.62282
Gusb	NC_000071.6	130002545	130003544	0.0576923	0.125	0.0714286	ENSMUSG00000025534	16.6541	39.7847	37.8672
Msto1	NC_000069.6	88913451	88914450	0.0175439	0.0847458	0.0185185	ENSMUSG00000068922	23.2555	41.4316	51.4545
Mycl	NC_000070.6	122995109	122996108	0.0588235	0.125	0.0649351	ENSMUSG00000028654	0.499488	2.27051	7.09778
S100a11	NC_000069.6	93519996	93520995	0.0769231	0.141844	0.1	ENSMUSG00000027907	241.928	692.918	693.501
Dhx57	NC_000083.6	80289977	80290976	0.0520833	0.116667	0.0123457	ENSMUSG00000035051	6.26773	9.60004	12.4074
Rfc4	NC_000082.6	23127231	23128230	0	0.0645161	0	ENSMUSG00000022881	6.46878	16.3861	17.8609
Ctsh	NC_000075.6	90053767	90054766	0.769231	0.833333	0.3125	ENSMUSG00000032359	78.022	173.605	217.807
Reep4	NC_000080.6	70544722	70545721	0.102804	0.166667	0.113043	ENSMUSG00000033589	11.5244	36.0498	32.8973
Trim65	NC_000077.6	116130761	116131760	0.020202	0.0833333	0.142857	ENSMUSG00000054517	3.98623	3.7901	7.84551
1110012L19Rik	NC_000086.7	70385413	70386412	0	0.0625	0	ENSMUSG00000045237	6.70585	10.0514	16.7485
Cblc	NC_000073.6	19796310	19797309	0.00769231	0.0689655	0.03	ENSMUSG00000040525	59.1028	64.1954	127.137
Aaas	NC_000081.6	102350260	102351259	0.00555556	0.0652174	0.00672646	ENSMUSG00000036678	10.3149	23.8123	18.5144
Ly6k	NC_000081.6	74799469	74800468	0.820896	0.880342	0.808333	ENSMUSG00000044678	1.03354	8.05053	15.1686
Pik3cd	NC_000070.6	149702067	149703066	0.830882	0.89011	0.810256	ENSMUSG00000039936	1.78644	3.32895	6.27178
Igfbp7	NC_000071.6	77407546	77408545	0.340909	0.4	0.17037	ENSMUSG00000036256	431.874	1448.29	1398.8
Syt12	NC_000085.6	4476644	4477643	0	0.0571429	0.00675676	ENSMUSG00000049303	6.43752	19.4322	25.7276
Sfxn3	NC_000085.6	45046741	45047740	0.00980392	0.0666667	0.00806452	ENSMUSG00000025212	35.1378	58.0898	60.376
Krt7	NC_000081.6	101411903	101412902	0.0909091	0.147059	0.108696	ENSMUSG00000023039	61.4777	118.888	160.375
Lgals3	NC_000080.6	47373360	47374359	0.5	0.555556	0.110169	ENSMUSG00000050335	385.126	486.434	716.394
Ap1ar	NC_000069.6	127837019	127838018	0.0126582	0.0677966	0	ENSMUSG00000074238	12.3765	14.2308	22.2729
1700088E04Rik	NC_000081.6	79140752	79141751	0.0107527	0.0654206	0	ENSMUSG00000033029	9.75026	26.8603	30.0861
Dynlt1c	NC_000083.6	6601279	6602278	0.0363636	0.0909091	0.00552486	ENSMUSG00000000579	3.15744	13.5978	14.9128
Pkn3	NC_000068.7	30077041	30078040	0.353659	0.408163	0.030837	ENSMUSG00000026785	1.49357	9.54422	2.40271
Il34	NC_000074.6	110805446	110806445	0.206897	0.26087	0	ENSMUSG00000031750	14.5709	30.6913	37.702
Traf1	NC_000068.7	34962049	34963048	0.910891	0.962963	0.896104	ENSMUSG00000026875	1.19917	4.05303	5.99842
Tpx2	NC_000068.7	152847464	152848463	0.00591716	0.057971	0.0376344	ENSMUSG00000027469	1.93312	9.77797	10.1136
Ormdl1	NC_000067.6	53296595	53297594	0.0228758	0.0736842	0.00623053	ENSMUSG00000026097	4.46219	9.6749	11.3171
Tnfaip6	NC_000068.7	52037613	52038612	0.0681818	0.11828	0.0707071	ENSMUSG00000053475	3.42492	20.645	7.47739
Mrpl33	NC_000071.6	31613451	31614450	0	0.05	0.173913	ENSMUSG00000106918	45.0315	127.147	120.959
Smox	NC_000068.7	131491284	131492283	0.0168067	0.0655738	0.0210526	ENSMUSG00000027333	29.1802	98.756	104.826
Pced1a	NC_000068.7	130424142	130425141	0.0167224	0.0654206	0.0491803	ENSMUSG00000037773	9.22456	20.545	18.8321
Pigk	NC_000069.6	152713585	152714584	0.146853	0.195122	0.413793	ENSMUSG00000039047	16.407	25.517	28.8677
Gbp2b	NC_000069.6	142594316	142595315	0.666667	0.714286	0.833333	ENSMUSG00000040264	11.9	0	3.26848
Lpin3	NC_000068.7	160880170	160881169	0.444444	0.491525	0.344444	ENSMUSG00000027412	2.10454	7.16146	6.26735
Xpnpep3	NC_000081.6	81399632	81400631	0.0190476	0.0659898	0	ENSMUSG00000022401	9.13914	18.4559	10.5439
Tgds	NC_000080.6	118132266	118133265	0.0788177	0.125	0.0764331	ENSMUSG00000022130	3.23529	5.20921	7.27882
Adgrl2	NC_000069.6	148988231	148989230	0	0.0454545	0	ENSMUSG00000028184	69.3668	114.43	132.81
Ssx2ip	NC_000069.6	146404140	146405139	0	0.0454545	0	ENSMUSG00000036825	10.3631	25.0582	33.0705
Gm17783	NC_000082.6	45531551	45532550	0.428571	0.473684	0.530303	ENSMUSG00000116542	2.12931	23.7089	29.3471
Hddc2	NC_000076.6	31312867	31313866	0.0392157	0.0833333	0.0504202	ENSMUSG00000000295	8.26726	20.5062	21.8917
Chil4	NC_000069.6	106218980	106219979	0.52809	0.571429	0.466667	ENSMUSG00000063779	1.5046	10.2425	21.5353
1110008P14Rik	NC_000068.7	32381416	32382415	0.0438596	0.0869565	0.057971	ENSMUSG00000039195	45.5009	64.6626	83.724
Plekha2	NC_000074.6	25104430	25105429	0.873626	0.916667	0.809524	ENSMUSG00000031557	18.7863	32.6347	33.5549
Mms19	NC_000085.6	41980666	41981665	0	0.0425532	0.00694444	ENSMUSG00000025159	9.0046	13.663	16.5123
Tmed3	NC_000075.6	89704544	89705543	0.0782609	0.12069	0.0591398	ENSMUSG00000032353	17.6548	29.1347	39.5907
Ampd2	NC_000069.6	108086167	108087166	0.157895	0.2	0.0632911	ENSMUSG00000027889	17.7672	22.4518	37.5349
Ggt6	NC_000077.6	72434747	72435746	0.0851064	0.125	0.166667	ENSMUSG00000040471	2.65561	10.4901	7.09527
Ralb	NC_000067.6	119504283	119505282	0.0136054	0.0526316	0.028169	ENSMUSG00000004451	54.3576	110.697	143.413
Tmem123	NC_000075.6	7763577	7764576	0.00980392	0.047619	0.0147059	ENSMUSG00000050912	36.6214	68.0617	74.9855
Sdcbp2	NC_000068.7	151572109	151573108	0.529412	0.567164	0.392857	ENSMUSG00000027456	23.65	24.4566	43.3944
Cdca2	NC_000080.6	67715342	67716341	0	0.0367647	0.00809717	ENSMUSG00000048922	0.635105	2.06399	5.64465
Has1	NC_000083.6	17855695	17856694	0.875	0.911765	0.857143	ENSMUSG00000003665	1.83774	8.14057	4.22424
Fermt1	NC_000068.7	132945688	132946687	0.276119	0.3125	0.261538	ENSMUSG00000027356	55.1629	90.7557	75.6405
Lrrk1	NC_000073.6	66387842	66388841	0.0179641	0.0540541	0.0271739	ENSMUSG00000015133	9.36001	17.5935	23.0725
Mgat4b	NC_000077.6	50224835	50225834	0	0.0357143	0	ENSMUSG00000036620	40.2	70.3105	71.6861
Tceanc2	NC_000070.6	107177867	107178866	0	0.0353982	0.0185185	ENSMUSG00000028619	4.71325	21.3749	14.4341
Glipr2	NC_000070.6	43957202	43958201	0.0306748	0.0656934	0.0232558	ENSMUSG00000028480	36.5305	93.67	77.7719
Ankrd50	NC_000069.6	38484361	38485360	0	0.0344828	0	ENSMUSG00000044864	71.5983	119.44	110.567
Adarb1	NC_000076.6	77417774	77418773	0.00409836	0.0375	0.0121951	ENSMUSG00000020262	3.54267	6.63439	7.75357
Pole	NC_000071.6	110285819	110286818	0	0.0333333	0	ENSMUSG00000007080	7.16538	21.1934	20.1592
Prr13	NC_000081.6	102458670	102459669	0	0.0327869	0.00403226	ENSMUSG00000023048	81.1211	142.099	163.659
Mcm3	NC_000067.6	20819714	20820713	0.0746269	0.107143	0.01	ENSMUSG00000041859	13.2061	33.2266	34.5262
Atp6v1g1	NC_000070.6	63544265	63545264	0.0263158	0.0588235	0	ENSMUSG00000039105	60.5735	113.333	128.815
Bmp1	NC_000080.6	70520214	70521213	0.155172	0.1875	0.317568	ENSMUSG00000022098	25.573	52.324	50.5967
Mmp14	NC_000080.6	54431098	54432097	0.0212766	0.0526316	0	ENSMUSG00000000957	48.42	72.683	87.1943
Ece1	NC_000070.6	137861712	137862711	0	0.03125	0.028	ENSMUSG00000057530	51.196	99.597	102.814
Fam76a	NC_000070.6	132922629	132923628	0.0555556	0.0862069	0.0414747	ENSMUSG00000028878	9.19013	12.2058	17.4758
Ncapg	NC_000071.6	45669372	45670371	0	0.0304569	0	ENSMUSG00000015880	0.243896	3.96446	6.10213
Foxa3	NC_000073.6	19023040	19024039	0.0465116	0.0769231	0	ENSMUSG00000040891	7.78334	19.3883	13.6326
Ccnb2	NC_000075.6	70421055	70422054	0.0462963	0.0763889	0.0825688	ENSMUSG00000032218	4.59409	16.2431	22.7998
Slc4a4	NC_000071.6	88793397	88794396	0.889831	0.91954	0.929825	ENSMUSG00000060961	24.4095	32.5938	49.8636
Tnc	NC_000070.6	64046516	64047515	0.0113636	0.0408163	0.0592105	ENSMUSG00000028364	0.28239	14.2508	5.77784
Cftr	NC_000072.6	18169762	18170761	0	0.0294118	0.0434783	ENSMUSG00000041301	23.4433	61.3063	76.9357
Cyb5r3	NC_000081.6	83171709	83172708	0.0123457	0.0416667	0.00869565	ENSMUSG00000018042	77.5037	143.757	139.107
Kdelr3	NC_000081.6	79515908	79516907	0	0.0277778	0	ENSMUSG00000010830	15.3147	25.7882	21.1469
Tes	NC_000072.6	17064649	17065648	0.0833333	0.111111	0.025	ENSMUSG00000029552	159.651	250.662	309.682
Spred3	NC_000073.6	29169355	29170354	0	0.0277778	0.02	ENSMUSG00000037239	6.10919	14.9708	12.7175
Ncaph	NC_000068.7	127133455	127134454	0.0362319	0.0639098	0.00581395	ENSMUSG00000034906	1.56666	12.0405	17.6557
Zfp617	NC_000074.6	71922325	71923324	0.0979381	0.125	0.159292	ENSMUSG00000066880	8.0506	22.8335	35.4624
Actn1	NC_000078.6	80259986	80260985	0	0.025641	0.0186335	ENSMUSG00000015143	289.211	591.402	696.751
Uxs1	NC_000067.6	43827320	43828319	0	0.0243902	0.0326797	ENSMUSG00000057363	18.0088	38.4612	31.1288
Slc35f6	NC_000071.6	30647439	30648438	0.0952381	0.119403	0.0457143	ENSMUSG00000029175	13.5764	24.0708	27.5429
Suox	NC_000076.6	128673419	128674418	0	0.0235294	0.0133929	ENSMUSG00000049858	4.02342	7.61802	3.31197
Plekhg2	NC_000073.6	28372189	28373188	0	0.0230769	0.00248756	ENSMUSG00000037552	24.7535	53.4246	53.4367
Arhgap27	NC_000077.6	103363193	103364192	0	0.0227273	0	ENSMUSG00000034255	12.0641	26.6556	40.5739
Tubb2b	NC_000079.6	34129855	34130854	0	0.0227273	0.010929	ENSMUSG00000045136	40.9486	102.713	97.0562
Gsta4	NC_000075.6	78191466	78192465	0.0200803	0.0425532	0.00485437	ENSMUSG00000032348	54.2508	84.494	145.78
Ccna2	NC_000069.6	36572526	36573525	0.826087	0.848101	0.798246	ENSMUSG00000027715	1.44862	11.5458	15.9709
Chpf	NC_000067.6	75478972	75479971	0	0.0217391	0.0294118	ENSMUSG00000032997	12.5193	26.7083	24.9162
Ecscr	NC_000084.6	35722226	35723225	0.178571	0.2	0.642857	ENSMUSG00000073599	13.197	39.5784	40.3135
Dhrs1	NC_000080.6	55745185	55746184	0	0.0210526	0.00784314	ENSMUSG00000002332	23.1866	33.1487	39.9812
Amotl2	NC_000075.6	102716794	102717793	0.0268456	0.047619	0.0452489	ENSMUSG00000032531	53.09	83.0098	93.9231
C1qtnf6	NC_000081.6	78531637	78532636	0.0102564	0.0310078	0.055	ENSMUSG00000022440	0.174217	5.95487	2.20615
Slc37a4	NC_000075.6	44396357	44397356	0	0.0204082	0.0212766	ENSMUSG00000032114	4.73234	12.911	11.8055
Phgdh	NC_000069.6	98339470	98340469	0.146341	0.166667	0.0666667	ENSMUSG00000053398	58.4835	134.307	118.498
Cntln	NC_000070.6	84883010	84884009	0.92973	0.94898	0.899666	ENSMUSG00000038070	1.88364	4.25518	3.93133
Ttll7	NC_000069.6	146851867	146852866	0	0.0185185	0.0386266	ENSMUSG00000036745	6.70699	10.394	15.7916
Sox4	NC_000079.6	28953183	28954182	0	0.0183486	0.0392157	ENSMUSG00000076431	68.5867	108.043	133.056
Muc6	NC_000073.6	141654809	141655808	0.8	0.818182	0.828571	ENSMUSG00000048191	5.16211	7.80461	38.7071
Srd5a2	NC_000083.6	74047417	74048416	0	0.0181818	0.0833333	ENSMUSG00000038541	0.170047	15.9761	15.1326
Il33	NC_000085.6	29924614	29925613	0.597222	0.615385	0.485714	ENSMUSG00000024810	1.44486	6.42144	6.78486
Rgs5	NC_000067.6	169655001	169656000	0.184783	0.202703	0.152174	ENSMUSG00000026678	36.4399	630.056	401.472
Prelid1	NC_000079.6	55321555	55322554	0	0.0178571	0	ENSMUSG00000021486	104.372	187.435	209.161
Mis18a	NC_000082.6	90726872	90727871	0	0.0178571	0.0129032	ENSMUSG00000022978	1.40148	4.89915	9.6459
Ctgf	NC_000076.6	24594942	24595941	0	0.0172414	0	ENSMUSG00000019997	19.4657	197.489	169.644
Lman1	NC_000084.6	66002136	66003135	0	0.0172414	0	ENSMUSG00000041891	40.4374	69.036	60.0173
Rhebl1	NC_000081.6	98880998	98881997	0	0.0172414	0	ENSMUSG00000023755	4.60195	7.21586	16.522
Vapb	NC_000068.7	173737071	173738070	0.0841121	0.100917	0.0841121	ENSMUSG00000054455	5.18234	9.67198	10.2239
Cndp2	NC_000084.6	84685203	84686202	0.0344828	0.0512821	0.0480769	ENSMUSG00000024644	16.1379	42.4593	44.5205
Cdkn3	NC_000080.6	46759965	46760964	0	0.016129	0.02	ENSMUSG00000037628	0.513556	2.43113	5.11005
Ide	NW_016097322.1	157889	158888	0.0296296	0.0445104	0.0335097	ENSMUSG00000111624	27.9839	53.244	51.7635
Rdh10	NC_000067.6	16105382	16106381	0	0.0145985	0	ENSMUSG00000025921	34.585	146.84	193.263
Mvb12a	NC_000074.6	71542379	71543378	0.0540541	0.0684932	0.048951	ENSMUSG00000031813	21.068	42.875	52.4285
Dnmt3a	NC_000078.6	3804486	3805485	0.955882	0.969697	0.936508	ENSMUSG00000020661	45.6353	81.4184	82.0592
Mif	NC_000076.6	75859751	75860750	0.0634921	0.0769231	0.030303	ENSMUSG00000033307	189.701	482.325	414.69
Agfg2	NC_000071.6	137684307	137685306	0.0418006	0.0526316	0.0359712	ENSMUSG00000029722	9.68492	12.5093	16.3125
Dazap1	NC_000076.6	80260967	80261966	0	0.0105263	0.00689655	ENSMUSG00000069565	24.8805	60.9874	44.7327
Abca7	NC_000076.6	79995955	79996954	0	0.010101	0	ENSMUSG00000035722	1.97157	4.22385	4.24345
Ormdl2	NC_000076.6	128821133	128822132	0	0.010101	0.0114068	ENSMUSG00000025353	36.8043	76.0227	78.5327
Lipe	NC_000073.6	25397987	25398986	0.915254	0.925	1	ENSMUSG00000003123	32.2229	57.9023	41.458
Lilr4b	NC_000076.6	51480112	51481111	0.717949	0.727273	0.916667	ENSMUSG00000112023	6.6748	27.3124	16.8927
Brca1	NC_000077.6	101551458	101552457	0	0.00925926	0.0416667	ENSMUSG00000017146	0.757444	2.71194	6.27603
Commd7	NC_000068.7	153632298	153633297	0.0104167	0.0196078	0	ENSMUSG00000056941	18.3266	31.0414	33.8449
Fam160a2	NC_000073.6	105399555	105400554	0	0.00909091	0.00338983	ENSMUSG00000044465	34.3648	53.4915	69.9753
Slamf9	NC_000067.6	172458069	172459068	0.88	0.888889	0.793651	ENSMUSG00000026548	2.48063	12.4805	12.295
Smpd3	NC_000074.6	106337489	106338488	0	0.00877193	0.00454546	ENSMUSG00000031906	11.6911	30.9483	39.1882
Tbcd	NC_000077.6	121450084	121451083	0.916031	0.924528	0.89	ENSMUSG00000039230	33.5103	58.3177	54.0466
Flywch1	NC_000083.6	23771376	23772375	0.00990099	0.0181818	0	ENSMUSG00000040097	9.40355	18.2904	15.2942
Cenpo	NC_000078.6	4233795	4234794	0.00956938	0.0175439	0.0130208	ENSMUSG00000020652	2.38891	4.86632	7.85219
Chtf18	NC_000083.6	25726939	25727938	0	0.00769231	0.00404858	ENSMUSG00000019214	0.179518	2.93466	4.81768
Plekhm3	NC_000067.6	64956325	64957324	0.0196078	0.0272727	0.05	ENSMUSG00000051344	12.0652	19.5184	37.3079
E2f3	NC_000079.6	29985620	29986619	0.0130719	0.0204082	0	ENSMUSG00000016477	3.25951	8.96981	9.25835
Samm50	NC_000081.6	84191733	84192732	0.00947867	0.0166667	0.015625	ENSMUSG00000022437	42.6665	75.5407	62.6426
Ctse	NC_000067.6	131637814	131638813	0.186747	0.193333	0.19883	ENSMUSG00000004552	1.25284	4.49403	29.4491
Bdnf	NC_000068.7	109674200	109675199	0.0891089	0.0956522	0.152778	ENSMUSG00000048482	5.91947	9.71921	8.73955
Nrp2	NC_000067.6	62702817	62703816	0.0102041	0.0163934	0.0116279	ENSMUSG00000025969	6.03621	10.07	20.0195
Lsm4	NC_000074.6	70672731	70673730	0.00615385	0.0123077	0.00475059	ENSMUSG00000110900	50.4306	115.835	107.397
Itga2	NC_000079.6	114931542	114932541	0.0496454	0.0549451	0.00877193	ENSMUSG00000015533	6.78831	37.89	63.0634
Hsd17b2	NC_000074.6	117700482	117701481	0.137615	0.142857	0.0916031	ENSMUSG00000031844	6.7008	18.3943	34.7374
Stard3nl	NC_000079.6	19395314	19396313	0.00813008	0.0133333	0.003663	ENSMUSG00000003062	26.2508	33.8947	48.1772
Mars	NC_000076.6	127311287	127312286	0	0.00458716	0.00220751	ENSMUSG00000040354	41.196	98.5132	86.2291
Itgb6	NC_000068.7	60722104	60723103	0.927007	0.931298	0.947791	ENSMUSG00000026971	49.557	194.54	187.816
Ift52	NC_000068.7	163016793	163017792	0	0.00395257	0.00302115	ENSMUSG00000017858	10.4013	20.3879	23.3498
Crtap	NC_000075.6	114390213	114391212	0.176471	0.180233	0.0504202	ENSMUSG00000032431	18.2474	33.9169	25.6533
Slc35g1	NC_000085.6	38395480	38396479	0.419355	0.423077	0.357143	ENSMUSG00000044026	7.76996	14.7081	20.4034
Abcb8	NC_000071.6	24393181	24394180	0.229885	0.233333	0.22449	ENSMUSG00000028973	11.7661	25.8275	24.0751
Top2a	NC_000077.6	99023706	99024705	0.00666667	0.00980392	0.0097561	ENSMUSG00000020914	4.58167	33.4044	53.229
Nusap1	NC_000068.7	119617798	119618797	0.00666667	0.00952381	0.0647482	ENSMUSG00000027306	0.688307	4.26724	6.36686
Rsph1	NC_000083.6	31276857	31277856	0.235294	0.238095	0.115942	ENSMUSG00000024033	2.3306	7.82381	7.73581
Slc38a1	NC_000081.6	96642414	96643413	0.361111	0.363636	0.147059	ENSMUSG00000023169	7.86535	17.8773	14.0679
Lpcat2	NC_000074.6	92854829	92855828	0.0754717	0.0779221	0.0606061	ENSMUSG00000033192	2.72738	6.36529	8.91831
AI987944	NC_000073.6	41392880	41393879	0.00746269	0.00990099	0.0307692	ENSMUSG00000056383	6.48759	15.3103	10.4859
Dtx4	NC_000085.6	12501702	12502701	0.135135	0.136364	0.0553506	ENSMUSG00000039982	4.48675	6.34152	8.17119
Elk3	NC_000076.6	93310660	93311659	0.0434783	0.0444444	0.0606061	ENSMUSG00000008398	7.24713	21.4426	17.2712
Kif20a	NC_000084.6	34624124	34625123	0.00746269	0.00757576	0	ENSMUSG00000003779	0.863262	5.11593	5.22491

## Sheet: 10. RRHP counts& clustering
chr	start	end	gene_id	str	Unique_5hmC_count_undamaged	Unique_5hmC_count_day3_DDC	Unique_5hmC_count_day5_DDC	hmC_count_T0	hmC_count_day3_DDC	hmC_count_day5_DDC	Cluster
					5hmC counts present only at T0	5hmC counts not present in T0	5hmC counts not present in T0	total 5hmC counts T0	total 5hmC counts day 3 DDC	total 5hmC counts day 5 DDC
NC_000070.6	148802367	148805366	Casz1	+	5	0	0	13	9	8	1
NC_000074.6	11672580	11675579	Gm7562	+	5	0	0	5	0	0	1
NC_000080.6	24486189	24489188	Polr3a	-	4	0	0	7	5	3	1
NC_000068.7	156861122	156864121	1110008F13Rik	+	0	6	0	11	17	9	2
NC_000085.6	7381003	7384002	1700105P06Rik	+	0	4	0	10	14	9	2
NC_000070.6	11964574	11967573	1700123M08Rik	+	0	4	0	8	11	4	2
NC_000067.6	37719091	37722090	2010300C02Rik	-	0	5	0	3	8	2	2
NC_000073.6	83881953	83884952	2310034P14Rik	+	0	6	0	17	21	16	2
NC_000080.6	56809939	56812938	2410022M11Rik	+	0	5	0	17	21	16	2
NC_000068.7	153344811	153347810	2500004C02Rik	-	0	4	0	10	14	9	2
NC_000085.6	32387216	32390215	2700046G09Rik	+	0	7	0	20	27	17	2
NC_000077.6	69900062	69903061	2810408A11Rik	-	0	4	0	15	18	14	2
NC_000067.6	64689660	64692659	2810408I11Rik	-	0	5	0	15	18	13	2
NC_000067.6	16092345	16095344	4930444P10Rik	-	0	4	0	5	7	3	2
NC_000075.6	72530859	72533858	4930509E16Rik	-	0	4	0	7	10	5	2
NC_000069.6	51274761	51277760	4930577N17Rik	+	0	7	0	13	19	12	2
NC_000068.7	156861946	156864945	5430405H02Rik	-	0	5	0	12	16	10	2
NC_000069.6	127895324	127898323	5730508B09Rik	-	0	5	0	5	8	3	2
NC_000078.6	21783558	21786557	6030426L16Rik	-	0	5	0	12	15	10	2
NC_000068.7	29251994	29254993	6530402F18Rik	-	0	4	0	10	13	9	2
NC_000076.6	43172699	43175698	9030612E09Rik	+	0	5	0	20	23	17	2
NC_000074.6	111144499	111147498	9430091E24Rik	-	0	5	0	8	12	7	2
NC_000080.6	122105975	122108974	A330035P11Rik	-	0	5	0	6	11	5	2
NC_000067.6	180724043	180727042	Acbd3	+	0	5	0	7	11	6	2
NC_000071.6	137286215	137289214	Ache	+	0	6	0	10	15	7	2
NC_000070.6	152176100	152179099	Acot7	+	0	5	0	9	14	8	2
NC_000067.6	125434728	125437727	Actr3	-	0	4	0	8	11	7	2
NT_187019.1	859191	862190	Adam23	+	0	5	0	5	10	4	2
NC_000081.6	73183948	73186947	Ago2	-	0	4	0	9	12	8	2
NC_000074.6	18844279	18847278	Agpat5	+	0	4	0	9	13	8	2
NC_000067.6	179803016	179806015	Ahctf1	-	0	5	0	7	12	6	2
NC_000085.6	7382052	7385051	AI846148	-	0	4	0	10	14	9	2
NC_000068.7	127006679	127009678	Ap4e1	+	0	4	0	5	8	4	2
NC_000078.6	51688928	51691927	Ap4s1	+	0	7	0	6	13	5	2
NC_000085.6	5558250	5561249	Ap5b1	+	0	6	0	14	19	13	2
NC_000081.6	99589028	99592027	Aqp5	+	0	4	0	12	14	11	2
NC_000073.6	100931162	100934161	Arhgef17	-	0	4	0	9	13	8	2
NC_000074.6	11726105	11729104	Arhgef7	+	0	6	0	8	13	7	2
NC_000081.6	96285522	96288521	Arid2	+	0	10	0	22	28	19	2
NC_000075.6	59485660	59488659	Arih1	-	0	6	0	13	16	11	2
NC_000075.6	99567945	99570944	Armc8	-	0	4	0	5	9	4	2
NC_000067.6	152764542	152767541	Arpc5	+	0	5	0	14	19	11	2
NC_000068.7	153344139	153347138	Asxl1	+	0	4	0	9	13	8	2
NC_000081.6	80253184	80256183	Atf4	+	0	4	0	12	16	11	2
NC_000077.6	102295674	102298673	Atxn7l3	-	0	6	0	12	16	11	2
NC_000069.6	88198205	88201204	AW047730	+	0	4	0	7	11	6	2
NC_000071.6	149676105	149679104	B3glct	+	0	5	0	6	11	5	2
NC_000073.6	128521583	128524582	Bag3	+	0	4	0	7	10	6	2
NC_000085.6	53943644	53946643	Bbip1	-	0	4	0	10	13	9	2
NC_000082.6	50431462	50434461	Bbx	-	0	7	0	7	14	6	2
NC_000079.6	24799657	24802656	BC005537	+	0	4	0	14	17	13	2
NC_000073.6	127707945	127710944	Bcl7c	-	0	6	0	6	12	5	2
NC_000068.7	133550159	133553158	Bmp2	+	0	4	0	12	15	10	2
NC_000068.7	172939322	172942321	Bmp7	-	0	4	0	14	16	12	2
NC_000073.6	81991300	81994299	Bnc1	-	0	5	0	16	20	15	2
NC_000085.6	36924079	36927078	Btaf1	+	0	4	0	10	13	7	2
NC_000067.6	85791408	85794407	Cab39	+	0	4	0	10	12	9	2
NC_000077.6	115812593	115815592	Caskin2	-	0	6	0	16	21	13	2
NC_000072.6	17279185	17282184	Cav2	+	0	4	0	2	6	1	2
NC_000077.6	29371641	29374640	Ccdc88a	+	0	4	0	10	13	9	2
NC_000067.6	64689041	64692040	Ccnyl1	+	0	5	0	15	18	13	2
NC_000076.6	43577169	43580168	Cd24a	+	0	4	0	10	13	9	2
NC_000080.6	67714842	67717841	Cdca2	-	0	4	0	12	15	11	2
NC_000068.7	179440431	179443430	Cdh4	+	0	5	0	10	14	8	2
NC_000071.6	124353629	124356628	Cdk2ap1	-	0	4	0	9	12	8	2
NC_000085.6	4094894	4097893	Cdk2ap2	+	0	5	0	5	9	4	2
NC_000084.6	25753163	25756162	Celf4	-	0	4	0	12	15	9	2
NC_000070.6	153973126	153976125	Cep104	+	0	4	0	10	12	9	2
NC_000083.6	15702967	15705966	Chd1	+	0	6	0	13	19	12	2
NC_000075.6	95406271	95409270	Chst2	-	0	8	0	14	20	13	2
NC_000085.6	43438350	43441349	Cnnm1	+	0	6	0	10	16	9	2
NC_000074.6	70300785	70303784	Cope	+	0	5	0	5	9	4	2
NC_000086.7	134057138	134060137	Cstf2	+	0	4	0	2	6	1	2
NC_000076.6	126976717	126979716	Ctdsp2	+	0	5	0	12	17	10	2
NC_000083.6	34999747	35002746	D17H6S56E-5	-	0	4	0	9	11	8	2
NC_000076.6	52231584	52234583	Dcbld1	+	0	7	0	7	13	6	2
NC_000068.7	167013255	167016254	Ddx27	+	0	4	0	4	8	3	2
NC_000074.6	70301512	70304511	Ddx49	-	0	5	0	5	9	4	2
NC_000070.6	86746398	86749397	Dennd4c	+	0	8	0	4	11	2	2
NC_000070.6	153974122	153977121	Dffb	-	0	4	0	10	13	9	2
NC_000068.7	91975444	91978443	Dgkz	-	0	4	0	7	10	6	2
NC_000079.6	92352783	92355782	Dhfr	+	0	4	0	11	14	9	2
NC_000077.6	78031666	78034665	Dhrs13os	-	0	4	0	7	10	6	2
NC_000075.6	110116617	110119616	Dhx30	-	0	4	0	4	8	3	2
NC_000071.6	123523165	123526164	Diablo	-	0	4	0	10	12	9	2
NC_000068.7	156611633	156614632	Dlgap4	+	0	4	0	8	11	7	2
NC_000083.6	15375049	15378048	Dll1	-	0	5	0	14	19	13	2
NC_000075.6	54500700	54503699	Dmxl2	-	0	4	0	11	15	10	2
NC_000082.6	22855845	22858844	Dnajb11	+	0	4	0	5	9	4	2
NC_000070.6	42947827	42950826	Dnajb5	+	0	5	0	8	13	7	2
NC_000068.7	18391854	18394853	Dnajc1	-	0	5	0	5	9	3	2
NC_000068.7	153647165	153650164	Dnmt3b	+	0	5	0	6	11	5	2
NC_000073.6	29301959	29304958	Dpf1	+	0	5	0	11	14	8	2
NC_000068.7	168229380	168232379	Dpm1	-	0	6	5	25	28	24	2
NC_000068.7	168229380	168232379	Dpm1-adnp	-	0	6	5	25	28	24	2
NC_000082.6	20514937	20517936	Dvl3	+	0	5	0	7	11	5	2
NT_187027.1	1214746	1217745	Ehmt2	+	0	4	0	8	11	7	2
NC_000069.6	28779273	28782272	Eif5a2	+	0	6	0	8	14	7	2
NC_000084.6	24601894	24604893	Elp2	+	0	0	4	11	13	10	2
NC_000070.6	150234726	150237725	Eno1	+	0	4	0	5	8	4	2
NC_000085.6	29647511	29650510	Ermp1	-	0	4	0	5	9	4	2
NC_000075.6	98984373	98987372	Faim	+	0	5	0	5	10	4	2
NC_000068.7	32533359	32536358	Fam102a	+	0	4	0	13	16	11	2
NC_000073.6	30971804	30974803	Fam187b	+	0	4	0	12	14	11	2
NC_000075.6	74950853	74953852	Fam214a	+	0	4	0	6	10	5	2
NC_000069.6	100488193	100491192	Fam46c	-	0	4	0	8	11	7	2
NC_000068.7	125505486	125508485	Fbn1	-	0	4	0	6	9	5	2
NC_000071.6	110447504	110450503	Fbrsl1	-	0	4	0	10	13	9	2
NC_000074.6	121082111	121085110	Fendrr	-	0	4	0	17	19	15	2
NC_000071.6	98252184	98255183	Fgf5	+	0	5	0	9	14	8	2
NC_000079.6	55150818	55153817	Fgfr4	+	0	6	0	5	11	4	2
NC_000079.6	31804646	31807645	Foxc1	+	0	4	0	15	17	14	2
NC_000074.6	121114171	121117170	Foxc2	+	0	4	0	13	15	10	2
NC_000070.6	46342194	46345193	Foxe1	+	0	5	0	10	15	9	2
NC_000074.6	121082386	121085385	Foxf1	+	0	4	0	18	20	16	2
NC_000083.6	47923644	47926643	Foxp4	-	0	5	0	8	13	7	2
NC_000073.6	57588518	57591517	Gabrb3	+	0	5	0	9	14	8	2
NC_000068.7	54434232	54437231	Galnt13	+	0	6	0	10	15	9	2
NC_000076.6	99106135	99109134	Galnt4	+	0	7	0	14	21	13	2
NC_000074.6	13493536	13496535	Gas6	-	0	4	0	3	7	2	2
NC_000073.6	99379415	99382414	Gdpd5	+	0	6	0	7	13	6	2
NC_000078.6	11265030	11268029	Gen1	-	0	4	0	9	13	8	2
NC_000085.6	30174442	30177441	Gldc	-	0	5	0	6	11	5	2
NC_000069.6	100487321	100490320	Gm12474	+	0	4	0	9	12	7	2
NC_000068.7	156612423	156615422	Gm14169	-	0	4	0	13	16	11	2
NC_000080.6	63605090	63608089	Gm15918	-	0	4	0	14	16	13	2
NC_000078.6	80944400	80947399	Gm20337	-	0	4	0	12	14	10	2
NC_000084.6	75366202	75369201	Gm20544	-	0	8	0	21	28	20	2
NC_000067.6	106170525	106173524	Gm20753	-	0	5	0	15	20	14	2
NC_000079.6	54948337	54951336	Gm31313	-	0	7	0	13	18	12	2
NC_000084.6	70567159	70570158	Gm31671	-	0	5	0	9	13	7	2
NC_000080.6	69283177	69286176	Gm31748	+	0	6	0	9	15	8	2
NC_000076.6	81429468	81432467	Gm31764	+	0	5	0	17	22	16	2
NC_000067.6	134297453	134300452	Gm32267	+	0	5	0	12	17	11	2
NC_000068.7	84712509	84715508	Gm32289	+	0	4	0	5	9	4	2
NC_000070.6	137992151	137995150	Gm32394	+	0	6	0	11	16	10	2
NC_000073.6	128459794	128462793	Gm32816	+	0	7	0	12	19	11	2
NC_000068.7	32083296	32086295	Gm33126	+	0	4	0	13	17	12	2
NC_000084.6	75818927	75821926	Gm33703	-	0	6	0	14	19	12	2
NC_000075.6	119983406	119986405	Gm33800	+	0	5	0	9	12	8	2
NC_000083.6	37044966	37047965	Gm33802	-	0	4	0	8	11	7	2
NC_000083.6	27202515	27205514	Gm34736	+	0	6	0	12	16	10	2
NC_000082.6	18586970	18589969	Gm35369	+	0	4	0	6	10	5	2
NC_000075.6	62978514	62981513	Gm35574	+	0	4	0	10	14	8	2
NC_000083.6	84187288	84190287	Gm36279	+	0	4	0	9	12	8	2
NC_000073.6	36696278	36699277	Gm36722	-	0	6	0	17	23	15	2
NC_000081.6	96286397	96289396	Gm38469	-	0	9	0	17	22	15	2
NC_000083.6	47922770	47925769	Gm38637	+	0	7	0	9	16	8	2
NC_000068.7	172938646	172941645	Gm40010	-	0	4	0	15	17	12	2
NC_000076.6	108159438	108162437	Gm40754	-	0	9	0	10	17	9	2
NC_000078.6	22622431	22625430	Gm40864	-	0	4	0	12	15	10	2
NC_000071.6	99036720	99039719	Gm42124	+	0	6	0	5	9	3	2
NC_000073.6	57589411	57592410	Gm42385	-	0	6	0	12	18	11	2
NC_000084.6	67086298	67089297	Gnal	+	0	5	0	10	14	8	2
NC_000077.6	102555193	102558192	Gpatch8	-	0	5	0	7	12	5	2
NC_000077.6	12036423	12039422	Grb10	-	0	4	0	10	12	8	2
NC_000076.6	75516968	75519967	Gucd1	-	0	4	0	10	13	9	2
NC_000083.6	34120719	34123718	H2-DMa	+	0	4	0	7	11	6	2
NC_000076.6	79714634	79717633	Hcn2	+	0	4	0	9	12	8	2
NC_000071.6	123971609	123974608	Hip1r	+	0	4	0	5	8	4	2
NC_000076.6	13963779	13966778	Hivep2	+	0	5	0	16	19	12	2
NC_000074.6	26118434	26121433	Hook3	-	0	8	0	12	18	9	2
NC_000068.7	180103408	180106407	Hrh3	-	0	6	0	9	15	8	2
NW_016097322.1	157389	160388	Ide	-	0	5	0	10	13	8	2
NC_000080.6	57522829	57525828	Il17d	+	0	5	0	6	10	5	2
NC_000077.6	70699179	70702178	Inca1	-	0	5	0	7	12	6	2
NC_000074.6	126592437	126595436	Irf2bp2	-	0	6	0	15	21	13	2
NC_000074.6	11007431	11010430	Irs2	-	0	6	0	17	23	15	2
NC_000079.6	116308722	116311721	Isl1	-	0	4	0	7	10	6	2
NC_000068.7	139676178	139679177	Ism1	+	0	7	0	9	15	8	2
NC_000075.6	118604709	118607708	Itga9	+	0	5	0	6	11	5	2
NC_000067.6	151342309	151345308	Ivns1abp	+	0	6	0	6	12	5	2
NC_000077.6	116842450	116845449	Jmjd6	-	0	4	0	12	14	10	2
NC_000074.6	121728559	121731558	Jph3	+	0	4	0	15	15	13	2
NC_000069.6	107457926	107460925	Kcnc4	-	0	4	0	14	17	13	2
NC_000073.6	34654510	34657509	Kctd15	-	0	4	0	8	12	6	2
NC_000080.6	67714084	67717083	Kctd9	+	0	4	0	13	16	12	2
NC_000077.6	70698323	70701322	Kif1c	+	0	5	0	7	12	6	2
NC_000074.6	72317062	72320061	Klf2	+	0	5	0	10	14	9	2
NC_000077.6	5260659	5263658	Kremen1	-	0	4	0	7	10	6	2
NC_000074.6	73352578	73355577	Large	-	0	8	0	13	20	12	2
NC_000079.6	9091814	9094813	Larp4b	+	0	7	0	10	16	9	2
NC_000070.6	134767005	134770004	Ldlrap1	-	0	4	0	11	14	10	2
NC_000083.6	27203491	27206490	Lemd2	-	0	6	0	12	16	10	2
NC_000073.6	139387984	139390983	LOC108167465	-	0	4	0	7	10	6	2
NC_000067.6	55404957	55407956	LOC108167625	-	0	6	0	11	17	10	2
NC_000078.6	112720585	112723584	LOC108168034	-	0	4	0	8	8	6	2
NC_000083.6	15703709	15706708	LOC108168347	-	0	6	0	13	19	12	2
NC_000068.7	54435078	54438077	LOC108168757	-	0	6	0	10	15	9	2
NC_000069.6	51414461	51417460	LOC108168868	+	4	5	0	16	17	13	2
NC_000071.6	123971868	123974867	LOC108169068	+	0	4	0	5	8	4	2
NC_000082.6	24392656	24395655	Lppos	-	0	4	0	17	19	15	2
NC_000076.6	125964219	125967218	Lrig3	+	0	5	0	11	15	7	2
NC_000081.6	39942995	39945994	Lrp12	-	0	4	0	11	15	10	2
NC_000070.6	107800212	107803211	Lrp8	+	0	4	0	7	11	6	2
NC_000070.6	107801172	107804171	Lrp8os3	-	0	5	0	11	16	9	2
NC_000082.6	37866400	37869399	Lrrc58	+	0	7	0	5	10	3	2
NC_000083.6	75003529	75006528	Ltbp1	+	0	5	0	17	21	15	2
NC_000069.6	104219407	104222406	Magi3	-	0	8	0	6	13	5	2
NC_000070.6	126255460	126258459	Map7d1	-	0	4	0	8	12	7	2
NC_000083.6	28689342	28692341	Mapk14	+	0	5	0	14	17	12	2
NC_000084.6	70566269	70569268	Mbd2	+	0	5	0	9	13	7	2
NC_000077.6	93883850	93886849	Mbtd1	+	0	6	0	11	16	9	2
NC_000086.7	157597716	157600715	Mbtps2	-	0	4	0	7	10	5	2
NC_000083.6	29887432	29890431	Mdga1	-	0	4	0	14	17	13	2
NC_000073.6	67372000	67374999	Mef2a	-	0	4	0	11	15	10	2
NC_000073.6	83883342	83886341	Mesdc1	-	0	4	0	15	17	14	2
NC_000077.6	116841515	116844514	Mettl23	+	0	4	0	11	14	9	2
NC_000084.6	10723553	10726552	Mib1	+	0	5	0	11	15	8	2
NC_000072.6	51268911	51271910	Mir148a	-	0	6	0	10	15	9	2
NC_000071.6	123521696	123524695	Mir7647	-	0	4	0	10	12	9	2
NC_000083.6	13758541	13761540	Mllt4	+	0	6	0	15	20	13	2
NC_000071.6	88718871	88721870	Mob1b	+	0	6	0	11	17	10	2
NC_000067.6	55129245	55132244	Mob4	+	0	4	0	6	8	4	2
NC_000070.6	81441915	81444914	Mpdz	-	0	5	0	6	10	5	2
NC_000079.6	92354004	92357003	Msh3	-	0	4	0	11	14	9	2
NC_000077.6	98793468	98796467	Msl1	+	0	6	0	12	17	10	2
NC_000069.6	51414016	51417015	Naa15	+	4	5	0	16	17	13	2
NC_000080.6	49170246	49173245	Naa30	+	0	6	0	15	21	14	2
NC_000071.6	33993984	33996983	Nat8l	+	0	4	0	14	15	12	2
NC_000067.6	13373084	13376083	Ncoa2	-	0	6	0	10	16	9	2
NC_000076.6	30802361	30805360	Ncoa7	-	0	5	0	8	13	5	2
NC_000074.6	119444719	119447718	Necab2	+	0	5	0	12	16	11	2
NC_000077.6	69899816	69902815	Neurl4	+	0	4	0	15	18	14	2
NC_000076.6	18316562	18319561	Nhsl1	+	0	7	0	7	12	6	2
NC_000067.6	39191715	39194714	Npas2	+	0	6	0	14	20	13	2
NC_000076.6	42582589	42585588	Nr2e1	-	0	6	0	13	19	12	2
NC_000086.7	140061708	140064707	Nup62cl	-	0	4	0	6	10	5	2
NC_000085.6	5559576	5562575	Ovol1	-	0	6	0	17	21	15	2
NC_000079.6	119426280	119429279	Paip1	+	0	4	0	11	12	8	2
NC_000074.6	88197213	88200212	Papd5	+	0	4	0	10	13	9	2
NC_000075.6	95557817	95560816	Paqr9	+	0	4	0	8	10	7	2
NC_000080.6	32199971	32202970	Parg	+	0	5	0	8	13	7	2
NC_000078.6	81858028	81861027	Pcnx	+	0	7	0	10	16	9	2
NC_000075.6	45904569	45907568	Pcsk7	+	0	4	0	12	15	10	2
NC_000070.6	11965451	11968450	Pdp1	-	0	4	0	8	11	4	2
NC_000071.6	65697164	65700163	Pds5a	-	0	9	0	16	23	15	2
NC_000077.6	21089324	21092323	Peli1	+	0	4	0	5	8	4	2
NC_000069.6	57846758	57849757	Pfn2	-	0	6	0	10	15	8	2
NC_000075.6	62979880	62982879	Pias1	-	0	4	0	10	14	8	2
NC_000070.6	133672242	133675241	Pigv	-	0	5	0	6	10	5	2
NC_000069.6	32395069	32398068	Pik3ca	+	0	5	0	7	10	6	2
NC_000076.6	127210644	127213643	Pip4k2c	-	0	4	0	14	17	13	2
NC_000068.7	135656662	135659661	Plcb4	+	0	5	0	9	13	7	2
NC_000067.6	55403946	55406945	Plcl1	+	0	6	0	11	17	10	2
NC_000076.6	99105036	99108035	Poc1b	+	0	6	0	7	13	6	2
NC_000076.6	108159831	108162830	Ppp1r12a	+	0	10	0	11	19	10	2
NC_000077.6	52096824	52099823	Ppp2ca	+	0	6	0	7	12	5	2
NW_004450259.3	193278	196277	Ppp2r3d	-	0	5	0	12	16	10	2
NC_000073.6	126791472	126794471	Ppp4c	-	0	5	0	7	11	6	2
NC_000070.6	154635874	154638873	Prdm16	-	0	5	0	14	17	13	2
NC_000083.6	35979009	35982008	Prr3	-	0	6	0	15	19	14	2
NC_000077.6	101094436	101097435	Psmc3ip	-	0	4	0	6	10	5	2
NC_000077.6	80426615	80429614	Psmd11	+	0	6	0	12	16	11	2
NC_000070.6	59548378	59551377	Ptbp3	-	0	5	0	11	14	9	2
NC_000071.6	121190398	121193397	Ptpn11	-	0	4	0	9	11	8	2
NC_000083.6	66518760	66521759	Rab12	-	0	4	0	8	11	7	2
NC_000079.6	17943218	17946217	Rala	-	0	4	0	7	10	6	2
NC_000079.6	43480284	43483283	Ranbp9	-	0	5	0	10	14	9	2
NC_000076.6	121475251	121478250	Rassf3	-	0	6	0	9	15	8	2
NC_000070.6	132344751	132347750	Rcc1	-	0	4	0	6	9	5	2
NC_000085.6	7265394	7268393	Rcor2	+	0	4	0	13	16	11	2
NC_000075.6	72530168	72533167	Rfx7	+	0	4	0	7	10	5	2
NC_000067.6	152765271	152768270	Rgl1	-	0	5	0	14	19	11	2
NC_000068.7	119156035	119159034	Rmdn3	-	0	6	0	5	10	4	2
NC_000073.6	99979695	99982694	Rnf169	-	0	4	0	6	9	4	2
NC_000074.6	26117365	26120364	Rnf170	+	0	8	0	10	17	8	2
NC_000075.6	45905912	45908911	Rnf214	-	0	4	0	10	13	9	2
NC_000078.6	16892978	16895977	Rock2	+	0	6	0	13	17	10	2
NC_000074.6	83995672	83998671	Samd1	+	0	4	0	13	16	12	2
NC_000073.6	110613954	110616953	Sbf2	-	0	4	0	12	15	11	2
NC_000070.6	132509457	132512456	Sesn2	-	0	4	0	7	11	6	2
NC_000075.6	14274301	14277300	Sesn3	+	0	6	0	10	16	8	2
NC_000077.6	66525127	66528126	Shisa6	-	0	7	0	11	16	9	2
NC_000077.6	109472597	109475596	Slc16a6	-	0	4	0	10	13	9	2
NC_000076.6	125388562	125391561	Slc16a7	-	0	4	0	4	8	3	2
NC_000079.6	34344960	34347959	Slc22a23	-	0	6	0	4	9	3	2
NT_166299.2	3188065	3191064	Slc25a33	-	0	4	0	5	7	4	2
NC_000080.6	69284104	69287103	Slc25a37	-	0	6	0	9	15	8	2
NC_000086.7	36793597	36796596	Slc25a5	+	0	4	0	6	9	5	2
NC_000083.6	28689419	28692418	Slc26a8	-	0	5	0	14	17	12	2
NC_000071.6	67304937	67307936	Slc30a9	+	0	5	0	7	10	6	2
NC_000076.6	52688501	52691500	Slc35f1	+	0	4	0	10	13	8	2
NC_000084.6	73702742	73705741	Smad4	-	0	6	0	7	13	5	2
NC_000076.6	128457236	128460235	Smarcc2	+	0	4	0	8	10	7	2
NC_000078.6	11263886	11266885	Smc6	+	0	4	0	9	13	8	2
NC_000083.6	71474344	71477343	Smchd1	-	0	4	0	11	15	9	2
NC_000081.6	82344046	82347045	Smdt1	+	0	4	0	6	10	5	2
NC_000071.6	65536185	65539184	Smim14	-	0	5	0	11	14	9	2
NC_000084.6	52765811	52768810	Sncaip	+	0	4	0	9	13	8	2
NC_000076.6	75516042	75519041	Snrpd3	+	0	4	0	9	12	8	2
NC_000068.7	157078266	157081265	Soga1	-	0	6	0	11	15	10	2
NC_000071.6	93044023	93047022	Sowahb	-	0	4	0	13	15	11	2
NC_000072.6	144780990	144783989	Sox5	-	0	4	0	5	8	4	2
NC_000079.6	51098508	51101507	Spin1	+	0	5	0	10	14	9	2
NC_000069.6	37637947	37640946	Spry1	+	0	4	0	10	13	9	2
NC_000068.7	157421901	157424900	Src	+	0	4	0	7	9	6	2
NC_000070.6	135352254	135355253	Srrm1	-	0	7	0	9	13	6	2
NC_000078.6	80943504	80946503	Srsf5	+	0	4	0	12	14	10	2
NC_000084.6	14682003	14685002	Ss18	-	0	6	0	10	14	9	2
NC_000073.6	74012728	74015727	St8sia2	-	0	4	0	10	14	9	2
NC_000076.6	62725100	62728099	Stox1	-	0	4	0	6	9	4	2
NC_000075.6	88481398	88484397	Syncrip	-	0	5	0	15	19	14	2
NC_000077.6	117807667	117810666	Syngr2	+	0	4	0	6	8	5	2
NC_000085.6	47065748	47068747	Taf5	+	0	8	0	8	15	7	2
NC_000076.6	121310190	121313189	Tbc1d30	-	0	4	0	8	12	6	2
NC_000082.6	22856702	22859701	Tbccd1	-	0	4	0	5	9	4	2
NC_000077.6	97150491	97153490	Tbkbp1	-	0	4	0	14	16	12	2
NC_000075.6	72110820	72113819	Tcf12	-	0	7	0	8	15	6	2
NC_000077.6	52282015	52285014	Tcf7	-	0	5	0	19	24	18	2
NC_000072.6	72788046	72791045	Tcf7l1	-	0	4	0	9	12	8	2
NC_000085.6	55739785	55742784	Tcf7l2	+	0	4	0	5	9	4	2
NC_000083.6	13760395	13763394	Tcte2	-	0	4	0	13	16	11	2
NC_000077.6	80141725	80144724	Tefm	-	0	4	0	4	8	3	2
NC_000073.6	128460669	128463668	Tial1	-	0	7	0	10	17	9	2
NC_000080.6	32200892	32203891	Timm23	-	0	5	0	8	13	7	2
NC_000075.6	61370326	61373325	Tle3	+	0	4	0	13	16	11	2
NC_000080.6	122105082	122108081	Tm9sf2	+	0	5	0	7	12	6	2
NC_000080.6	30823594	30826593	Tmem110	+	0	4	0	4	8	3	2
NC_000071.6	125530418	125533417	Tmem132b	+	0	5	0	10	14	9	2
NC_000074.6	70486472	70489471	Tmem59l	-	0	4	0	9	12	8	2
NC_000067.6	16663191	16666190	Tmem70	+	0	4	0	4	8	3	2
NC_000075.6	121295507	121298506	Trak1	+	0	4	0	8	11	7	2
NC_000072.6	53819826	53822825	Tril	-	0	9	0	11	19	10	2
NC_000077.6	115811743	115814742	Tsen54	+	0	4	0	16	19	14	2
NC_000073.6	36695737	36698736	Tshz3	+	0	9	0	17	26	16	2
NC_000084.6	63691360	63694359	Txnl1	-	0	4	0	8	12	7	2
NC_000077.6	72605261	72608260	Ube2g1	+	0	6	0	10	15	9	2
NC_000071.6	65535082	65538081	Ube2k	+	0	5	0	11	14	9	2
NC_000077.6	21370268	21373267	Ugp2	-	0	4	0	7	11	5	2
NC_000079.6	54947411	54950410	Unc5a	+	0	7	0	13	18	12	2
NC_000082.6	77011683	77014682	Usp25	+	0	4	0	6	8	4	2
NC_000074.6	81014032	81017031	Usp38	-	0	5	0	9	13	8	2
NC_000071.6	74067412	74070411	Usp46	-	0	6	0	6	12	5	2
NC_000077.6	93884832	93887831	Utp18	-	0	6	0	10	16	9	2
NC_000083.6	34998907	35001906	Vars	+	0	4	0	9	11	8	2
NC_000069.6	109338258	109341257	Vav3	+	0	6	0	5	10	4	2
NC_000077.6	26593015	26596014	Vrk2	-	0	5	0	5	10	4	2
NC_000078.6	79171643	79174642	Vti1b	-	0	4	0	9	13	8	2
NC_000071.6	134175951	134178950	Wbscr16	-	0	4	0	6	9	4	2
NC_000077.6	69933834	69936833	Ybx2	+	0	6	0	10	15	9	2
NC_000083.6	74487493	74490492	Yipf4	+	0	4	0	7	10	6	2
NC_000084.6	75818178	75821177	Zbtb7c	+	0	6	0	12	17	10	2
NC_000070.6	133632481	133635480	Zdhhc18	-	0	4	0	7	11	6	2
NC_000068.7	84714165	84717164	Zdhhc5	-	0	4	0	6	10	5	2
NC_000083.6	46381504	46384503	Zfp318	+	0	5	0	9	14	8	2
NC_000083.6	84186948	84189947	Zfp36l2	-	0	5	0	11	15	10	2
NC_000073.6	127242480	127245479	Zfp771	+	0	5	0	5	9	4	2
NC_000080.6	56884421	56887420	Zmym2	+	0	4	0	18	21	15	2
NC_000080.6	56810892	56813891	Zmym5	-	0	5	0	17	21	16	2
NC_000085.6	37205527	37208526	38412	+	0	5	0	9	13	10	3
NC_000082.6	18628939	18631938	38596	-	0	4	0	6	9	7	3
NC_000077.6	53517736	53520735	39692	+	0	4	0	7	11	7	3
NC_000082.6	31947522	31950521	0610012G03Rik	-	0	4	0	7	11	8	3
NC_000085.6	21651792	21654791	1110059E24Rik	-	0	5	0	8	12	8	3
NC_000070.6	124849731	124852730	1110065P20Rik	-	0	9	0	7	16	10	3
NC_000075.6	94537082	94540081	1190002N15Rik	-	0	9	0	10	18	12	3
NC_000074.6	120633383	120636382	1190005I06Rik	-	0	4	0	6	10	6	3
NC_000076.6	89684363	89687362	1500026H17Rik	+	0	6	0	5	11	7	3
NC_000072.6	86525330	86528329	1600020E01Rik	+	0	7	4	16	23	18	3
NC_000080.6	66296130	66299129	1700001G11Rik	-	0	4	0	6	9	6	3
NC_000077.6	98357284	98360283	1700003D09Rik	-	0	4	0	4	8	5	3
NC_000068.7	28465325	28468324	1700007K13Rik	-	0	5	0	4	8	5	3
NC_000076.6	61679291	61682290	1700022H01Rik	-	0	5	0	2	7	3	3
NC_000074.6	22396721	22399720	1810012K16Rik	+	0	6	0	5	11	7	3
NC_000081.6	89074855	89077854	1810021B22Rik	-	0	6	0	10	15	11	3
NC_000077.6	57800468	57803467	2010001A14Rik	-	0	6	0	14	19	15	3
NC_000074.6	84010721	84013720	2210011C24Rik	-	0	4	0	13	16	14	3
NC_000075.6	63398245	63401244	2300009A05Rik	-	0	4	0	6	10	6	3
NC_000073.6	90128937	90131936	2310010J17Rik	-	0	5	0	8	12	8	3
NC_000078.6	80131845	80134844	2310015A10Rik	-	0	6	0	2	8	4	3
NC_000074.6	124662370	124665369	2310022B05Rik	-	0	6	0	10	15	11	3
NC_000083.6	35896379	35899378	2310061I04Rik	-	0	6	0	3	9	3	3
NC_000078.6	83948608	83951607	2410016O06Rik	+	0	5	0	7	11	8	3
NC_000078.6	23009244	23012243	2410018L13Rik	-	0	6	4	9	15	11	3
NC_000070.6	10872251	10875250	2610301B20Rik	+	0	5	0	4	9	5	3
NC_000085.6	7415625	7418624	2700081O15Rik	+	0	10	0	9	19	11	3
NC_000074.6	123040575	123043574	2810013P06Rik	+	0	10	4	16	26	18	3
NC_000067.6	127773055	127776054	2900009J06Rik	-	0	4	0	6	10	6	3
NC_000071.6	144255206	144258205	2900089D17Rik	-	0	7	0	8	15	10	3
NC_000078.6	71014824	71017823	3110056K07Rik	-	0	7	0	16	22	17	3
NC_000071.6	25497797	25500796	4831440E17Rik	+	0	10	4	15	24	17	3
NC_000075.6	45430233	45433232	4833428L15Rik	-	0	4	0	11	15	12	3
NC_000078.6	110838962	110841961	4921507G05Rik	+	0	4	0	5	9	5	3
NC_000078.6	12391476	12394475	4921511I17Rik	-	0	15	0	0	15	1	3
NC_000068.7	156719910	156722909	4930405A21Rik	-	0	5	0	5	9	6	3
NC_000073.6	122969460	122972459	4930413G21Rik	-	0	8	0	8	16	10	3
NC_000068.7	18996319	18999318	4930426L09Rik	+	0	4	0	10	13	11	3
NC_000069.6	32363489	32366488	4930429B21Rik	+	0	5	0	10	14	10	3
NC_000075.6	79791641	79794640	4930429F24Rik	+	0	5	0	6	11	7	3
NW_019168530.1	88232	91231	4930465K10Rik	+	0	5	0	11	15	11	3
NC_000084.6	70471505	70474504	4930503L19Rik	-	0	7	0	8	15	8	3
NC_000075.6	124421251	124424250	4930526I15Rik	+	0	5	0	6	10	6	3
NC_000069.6	135437666	135440665	4930539J05Rik	-	0	8	4	14	21	16	3
NC_000081.6	10712836	10715835	4930556M19Rik	+	0	5	0	9	13	10	3
NC_000084.6	10704860	10707859	4930563E18Rik	+	0	4	0	8	12	8	3
NC_000069.6	58690589	58693588	4930593A02Rik	+	0	11	0	11	21	13	3
NC_000073.6	114414162	114417161	4933406I18Rik	-	0	6	0	13	18	13	3
NC_000070.6	33030324	33033323	4933421O10Rik	-	0	4	0	8	10	8	3
NC_000075.6	75408184	75411183	4933433G15Rik	+	0	4	0	10	14	10	3
NC_000077.6	59503653	59506652	4933439C10Rik	+	0	5	0	7	11	8	3
NC_000079.6	45963062	45966061	5033430I15Rik	+	0	7	0	12	19	14	3
NC_000076.6	95415375	95418374	5730420D15Rik	+	0	6	0	17	23	19	3
NC_000070.6	154635368	154638367	5930403L14Rik	-	0	9	4	18	25	19	3
NC_000071.6	128599688	128602687	5930412G12Rik	-	0	9	4	22	31	22	3
NC_000075.6	58486603	58489602	6030419C18Rik	+	0	10	6	11	18	11	3
NW_019168530.1	89059	92058	8030462N17Rik	-	0	5	0	10	14	10	3
NC_000073.6	128237032	128240031	9130023H24Rik	-	0	4	0	12	15	13	3
NC_000067.6	136414520	136417519	9230116N13Rik	-	0	4	0	2	5	2	3
NC_000075.6	85842660	85845659	9330154J02Rik	-	0	4	0	12	15	12	3
NC_000079.6	51099728	51102727	9430083A17Rik	-	0	6	0	10	15	10	3
NC_000079.6	59584224	59587223	A230056J06Rik	-	0	7	0	8	15	10	3
NC_000075.6	86693442	86696441	A330041J22Rik	+	0	4	0	6	10	7	3
NC_000074.6	120227231	120230230	A330074K22Rik	-	0	8	0	12	20	12	3
NC_000072.6	8508162	8511161	A430035B10Rik	-	0	8	0	10	18	12	3
NC_000070.6	16162110	16165109	A530072M11Rik	+	0	10	5	8	18	11	3
NC_000070.6	11190231	11193230	A630034I12Rik	-	0	12	0	9	21	10	3
NC_000076.6	7661371	7664370	A630066F11Rik	+	0	5	0	5	10	6	3
NC_000071.6	22745885	22748884	A930003O13Rik	-	0	4	0	7	10	8	3
NC_000085.6	29520988	29523987	A930007I19Rik	-	0	8	0	14	21	14	3
NC_000076.6	69212157	69215156	A930033H14Rik	-	0	6	0	7	13	8	3
NC_000068.7	152080315	152083314	AA387200	-	0	5	0	8	12	9	3
NC_000069.6	121814216	121817215	Abcd3	-	0	6	0	6	12	8	3
NC_000085.6	21651227	21654226	Abhd17b	+	0	5	0	8	12	8	3
NC_000084.6	10705785	10708784	Abhd3	-	0	4	0	8	12	8	3
NC_000075.6	122349539	122352538	Abhd5	+	0	5	0	7	12	8	3
NC_000074.6	71462658	71465657	Abhd8	-	0	5	0	11	16	11	3
NC_000068.7	103564310	103567309	Abtb2	+	0	5	0	12	17	12	3
NC_000070.6	155889875	155892874	Acap3	+	0	4	0	10	14	11	3
NC_000073.6	98308549	98311548	Acer3	-	0	4	0	9	13	9	3
NC_000070.6	40141265	40144264	Aco1	+	0	4	0	5	9	5	3
NC_000069.6	32706546	32709545	Actl6a	+	0	7	0	6	13	8	3
NC_000078.6	80259486	80262485	Actn1	-	0	7	4	9	15	11	3
NC_000068.7	58565829	58568828	Acvr1	-	0	9	4	9	18	11	3
NC_000068.7	48812109	48815108	Acvr2a	+	0	4	0	6	10	6	3
NC_000075.6	70676918	70679917	Adam10	+	0	10	4	7	17	10	3
NC_000074.6	25015935	25018934	Adam9	-	0	4	0	7	11	7	3
NC_000077.6	50600085	50603084	Adamts2	+	0	6	0	10	16	11	3
NC_000075.6	90160978	90163977	Adamts7	+	0	4	0	9	13	10	3
NC_000074.6	88270366	88273365	Adcy7	+	0	4	0	5	7	5	3
NC_000081.6	74514196	74517195	Adgrb1	+	0	4	0	6	10	6	3
NC_000076.6	14544724	14547723	Adgrg6	-	0	8	0	5	13	7	3
NC_000074.6	83898098	83901097	Adgrl1	+	0	4	0	15	19	16	3
NC_000069.6	148987731	148990730	Adgrl2	-	0	8	0	20	27	20	3
NC_000084.6	80150787	80153786	Adnp2	-	0	4	0	2	6	3	3
NC_000067.6	134234458	134237457	Adora1	-	0	6	0	4	10	4	3
NC_000068.7	131561286	131564285	Adra1d	-	0	4	0	10	14	11	3
NC_000071.6	35276566	35279565	Adra2c	+	0	5	0	6	10	6	3
NC_000085.6	4305223	4308222	Adrbk1	-	0	4	0	5	9	5	3
NC_000068.7	180169490	180172489	Adrm1	+	0	4	0	9	13	10	3
NC_000077.6	20740557	20743556	Aftph	-	0	7	0	9	16	9	3
NC_000067.6	89452811	89455810	Agap1	+	0	9	4	10	19	13	3
NC_000070.6	156196520	156199519	Agrn	-	0	12	6	8	20	12	3
NC_000070.6	148087065	148090064	Agtrap	-	0	4	0	5	9	6	3
NC_000071.6	123141959	123144958	AI480526	-	0	7	4	14	19	15	3
NC_000071.6	143908840	143911839	Aimp2	-	0	4	0	4	7	4	3
NC_000079.6	100649343	100652342	Ak6	+	0	4	0	10	14	10	3
NC_000077.6	61929307	61932306	Akap10	-	0	5	0	4	9	5	3
NC_000071.6	3925827	3928826	Akap9	+	0	5	0	6	11	6	3
NC_000070.6	123749300	123752299	Akirin1	-	0	8	4	9	16	11	3
NC_000070.6	139308701	139311700	Akr7a5	+	0	5	0	8	13	9	3
NC_000073.6	66426478	66429477	Aldh1a3	-	0	4	0	7	11	7	3
NC_000075.6	50772881	50775880	Alg9	+	0	6	0	3	9	5	3
NC_000068.7	93640434	93643433	Alx4	+	0	6	4	15	20	16	3
NC_000077.6	120597366	120600365	Alyref	-	0	4	0	9	13	9	3
NC_000074.6	94011641	94014640	Amfr	-	0	5	0	8	13	9	3
NC_000077.6	120596421	120599420	Anapc11	+	0	4	0	10	14	10	3
NC_000071.6	122420444	122423443	Anapc7	+	0	4	0	6	10	6	3
NC_000084.6	36558603	36561602	Ankhd1	+	0	7	0	12	18	13	3
NC_000083.6	66076090	66079089	Ankrd12	-	0	11	4	9	20	11	3
NC_000069.6	157944779	157947778	Ankrd13c	+	0	7	0	9	16	11	3
NC_000067.6	54925733	54928732	Ankrd44	-	0	5	0	8	13	8	3
NC_000069.6	38483861	38486860	Ankrd50	-	0	6	0	4	10	5	3
NC_000078.6	110978051	110981050	Ankrd9	-	0	5	0	5	10	5	3
NC_000083.6	27907306	27910305	Anks1	+	0	4	0	7	11	7	3
NC_000070.6	46449117	46452116	Anp32b	+	0	8	0	11	16	12	3
NC_000084.6	46739876	46742875	Ap3s1	+	0	8	0	7	14	9	3
NC_000073.6	64499706	64502705	Apba2	+	0	7	0	10	16	10	3
NC_000076.6	83647861	83650860	Appl2	-	0	4	0	3	7	3	3
NC_000081.6	98762119	98765118	Arf3	-	0	4	0	6	9	7	3
NC_000078.6	69370150	69373149	Arf6	+	0	6	4	12	18	14	3
NC_000067.6	10231671	10234670	Arfgef1	-	0	8	0	9	16	11	3
NC_000069.6	84581835	84584834	Arfip1	-	0	7	0	8	14	8	3
NC_000068.7	20967641	20970640	Arhgap21	-	0	5	0	14	18	14	3
NC_000077.6	103362693	103365692	Arhgap27	-	0	6	0	8	12	8	3
NC_000069.6	121951072	121954071	Arhgap29	+	0	4	0	6	10	6	3
NC_000073.6	24900917	24903916	Arhgef1	+	0	6	0	3	9	5	3
NC_000080.6	51982681	51985680	Arhgef40	+	0	5	0	10	15	11	3
NC_000072.6	43263644	43266643	Arhgef5	+	0	7	0	6	12	6	3
NC_000078.6	71013967	71016966	Arid4a	+	0	6	0	14	19	14	3
NC_000068.7	52423875	52426874	Arl5a	-	0	5	0	3	7	4	3
NC_000073.6	128235357	128238356	Armc5	+	0	4	0	11	14	12	3
NC_000072.6	113376113	113379112	Arpc4	+	0	6	0	9	14	10	3
NC_000077.6	109471334	109474333	Arsg	+	0	6	0	15	20	16	3
NC_000081.6	64381920	64384919	Asap1	-	0	8	0	5	13	6	3
NC_000076.6	53594961	53597960	Asf1a	+	0	9	0	5	14	7	3
NC_000069.6	88948492	88951491	Ash1l	+	0	5	0	9	14	10	3
NC_000084.6	46740840	46743839	Atg12	-	0	8	0	7	14	9	3
NC_000082.6	45156784	45159783	Atg3	+	0	7	0	7	13	7	3
NC_000067.6	93753033	93756032	Atg4b	+	0	6	0	8	14	9	3
NC_000075.6	21263257	21266256	Atg4d	+	0	4	0	3	7	3	3
NC_000076.6	44266339	44269338	Atg5	+	0	5	0	6	11	7	3
NC_000078.6	69891105	69894104	Atl1	+	0	7	0	10	17	12	3
NC_000072.6	72234818	72237817	Atoh8	-	0	4	0	7	11	7	3
NC_000074.6	12755016	12758015	Atp11a	+	0	4	0	10	13	11	3
NC_000082.6	30387861	30390860	Atp13a3	-	0	5	0	10	15	10	3
NC_000075.6	96363300	96366299	Atp1b3	-	0	4	0	7	11	8	3
NC_000071.6	122501226	122504225	Atp2a2	-	0	7	0	9	15	11	3
NW_019168530.1	147816	150815	Atp5a1	+	0	4	0	6	10	7	3
NC_000077.6	115418920	115421919	Atp5h	-	0	4	0	8	12	9	3
NC_000085.6	57608963	57611962	Atrnl1	+	0	9	0	6	15	8	3
NC_000073.6	126502645	126505644	Atxn2l	-	0	6	0	7	12	8	3
NC_000081.6	85579142	85582141	AU022754	+	0	14	6	13	26	16	3
NC_000070.6	126751555	126754554	AU040320	+	0	6	0	10	16	12	3
NW_016097317.1	1215056	1218055	Auts2	-	0	4	0	14	18	14	3
NC_000072.6	56712905	56715904	Avl9	+	0	5	0	6	10	7	3
NC_000076.6	12922128	12925127	B230208H11Rik	-	0	4	0	3	7	4	3
NC_000079.6	55691124	55694123	B230219D22Rik	+	0	4	0	3	6	4	3
NC_000083.6	45431831	45434830	B230354K17Rik	+	0	4	0	12	14	12	3
NC_000070.6	141544162	141547161	B330016D10Rik	+	0	5	0	10	14	10	3
NC_000075.6	92541870	92544869	B430319G15Rik	-	0	6	0	8	14	10	3
NC_000070.6	117882483	117885482	B4galt2	-	0	5	0	3	8	4	3
NC_000082.6	38740114	38743113	B4galt4	+	0	9	4	4	13	7	3
NC_000070.6	32236574	32239573	Bach2	+	0	8	0	9	17	11	3
NC_000074.6	25784210	25787209	Bag4	-	0	8	0	5	12	6	3
NC_000076.6	7680159	7683158	BC020402	-	0	7	0	3	10	5	3
NC_000077.6	24074544	24077543	Bcl11a	+	0	4	0	7	11	8	3
NC_000078.6	108003140	108006139	Bcl11b	-	0	6	4	12	18	14	3
NC_000075.6	44480366	44483365	Bcl9l	+	0	4	0	6	10	7	3
NC_000076.6	75058896	75061895	Bcr	+	0	6	0	10	15	10	3
NC_000076.6	43477140	43480139	Bend3	+	0	6	0	10	15	10	3
NC_000067.6	33906935	33909934	Bend6	-	0	4	0	3	7	4	3
NC_000086.7	136214514	136217513	Bex1	-	0	5	0	2	7	3	3
NC_000072.6	145864421	145867420	Bhlhe41	-	0	6	0	12	17	12	3
NC_000068.7	18675018	18678017	Bmi1	+	0	7	0	7	14	9	3
NC_000071.6	98852415	98855414	Bmp3	+	0	4	0	7	11	7	3
NC_000075.6	23221076	23224075	Bmper	+	0	4	0	10	13	11	3
NC_000080.6	34502462	34505461	Bmpr1a	-	0	4	0	7	9	7	3
NC_000067.6	59762270	59765269	Bmpr2	+	0	4	0	12	16	13	3
NC_000082.6	44557871	44560870	Boc	-	0	4	0	5	9	6	3
NC_000077.6	69057775	69060774	Borcs6	+	0	5	0	13	17	13	3
NC_000071.6	31695906	31698905	Bre	+	0	8	0	4	12	5	3
NC_000085.6	5039232	5042231	Brms1	+	0	4	0	7	11	8	3
NC_000078.6	55834226	55837225	Brms1l	+	0	4	0	8	12	8	3
NC_000073.6	141947751	141950750	Brsk2	+	0	7	0	11	18	13	3
NC_000073.6	81828500	81831499	Btbd1	-	0	6	0	6	12	7	3
NC_000071.6	107435997	107438996	Btbd8	+	0	6	0	4	10	5	3
NC_000082.6	78376182	78379181	Btg3	-	0	5	0	11	15	12	3
NC_000068.7	33639193	33642192	C130021I20Rik	+	0	8	5	22	28	24	3
NC_000067.6	184882037	184885036	C130074G19Rik	-	0	4	0	8	12	8	3
NC_000075.6	44319283	44322282	C2cd2l	-	0	8	0	6	13	7	3
NC_000068.7	26139507	26142506	C330006A16Rik	-	0	6	0	6	11	7	3
NC_000084.6	11837274	11840273	Cables1	+	0	6	0	8	13	8	3
NC_000077.6	4745779	4748778	Cabp7	-	0	9	4	9	18	12	3
NC_000077.6	94473390	94476389	Cacna1g	-	0	8	0	15	22	17	3
NC_000081.6	80285238	80288237	Cacna1i	+	0	5	0	7	11	8	3
NC_000071.6	15932691	15935690	Cacna2d1	+	0	5	0	11	15	11	3
NC_000080.6	29720865	29723864	Cacna2d3	-	0	7	0	16	20	16	3
NC_000077.6	98021976	98024975	Cacnb1	-	0	4	0	7	11	7	3
NC_000083.6	10317919	10320918	Cahm	+	0	6	0	10	14	11	3
NC_000078.6	100197435	100200434	Calm1	+	0	5	0	4	9	5	3
NC_000080.6	20793130	20796129	Camk2g	-	0	9	0	5	14	8	3
NC_000071.6	122778472	122781471	Camkk2	-	0	9	4	7	16	9	3
NC_000068.7	25982459	25985458	Camsap1	-	0	6	4	10	16	12	3
NC_000070.6	151860769	151863768	Camta1	-	0	9	6	13	22	14	3
NC_000077.6	118418135	118421134	Cant1	-	0	7	0	4	11	6	3
NC_000079.6	46499903	46502902	Cap2	+	0	4	0	6	9	7	3
NC_000081.6	78802076	78805075	Card10	-	0	7	0	12	19	14	3
NC_000081.6	5115366	5118365	Card6	-	0	4	0	8	12	8	3
NC_000075.6	21544894	21547893	Carm1	+	0	4	0	10	14	11	3
NC_000068.7	121864970	121867969	Casc4	+	0	5	0	8	13	9	3
NC_000074.6	105168674	105171673	Cbfb	+	0	9	0	7	16	9	3
NC_000072.6	51468447	51471446	Cbx3	+	0	5	0	13	18	14	3
NC_000077.6	119085238	119088237	Cbx4	-	0	4	0	12	15	12	3
NC_000074.6	94917099	94920098	Ccdc102a	-	0	6	0	5	11	7	3
NC_000081.6	82125900	82128899	Ccdc134	+	0	6	0	7	13	9	3
NC_000085.6	56821489	56824488	Ccdc186	-	0	5	0	8	13	9	3
NC_000077.6	55077646	55080645	Ccdc69	-	0	4	0	3	7	3	3
NC_000078.6	32376789	32379788	Ccdc71l	+	0	6	0	7	13	7	3
NC_000085.6	10948267	10951266	Ccdc86	-	0	6	0	7	13	8	3
NC_000077.6	6544887	6547886	Ccm2	+	0	6	0	7	11	7	3
NC_000070.6	11188298	11191297	Ccne2	+	0	11	0	5	16	6	3
NC_000077.6	43526749	43529748	Ccnjl	+	0	5	0	5	10	5	3
NC_000067.6	127772164	127775163	Ccnt2	+	0	4	0	6	10	6	3
NC_000084.6	9449151	9452150	Ccny	-	0	4	0	8	11	8	3
NC_000080.6	36967773	36970772	Ccser2	-	0	7	4	7	14	8	3
NC_000082.6	49853253	49856252	Cd47	+	0	4	0	9	13	10	3
NC_000074.6	13755649	13758648	Cdc16	+	0	4	0	6	10	7	3
NC_000076.6	79680194	79683193	Cdc34	+	0	8	0	8	16	8	3
NC_000070.6	137356760	137359759	Cdc42	-	0	9	0	5	14	5	3
NC_000085.6	6304457	6307456	Cdc42bpg	+	0	4	0	4	7	4	3
NC_000083.6	45432735	45435734	Cdc5l	-	0	4	0	11	14	11	3
NC_000078.6	112828517	112831516	Cdca4	-	0	4	0	8	12	8	3
NC_000080.6	54641068	54644067	Cdh24	-	0	5	0	7	12	8	3
NC_000071.6	5379252	5382251	Cdk14	-	0	6	0	10	16	10	3
NC_000077.6	80475046	80478045	Cdk5r1	+	0	4	0	11	15	12	3
NC_000071.6	146228802	146231801	Cdk8	+	0	5	0	6	11	6	3
NC_000070.6	89293620	89296619	Cdkn2a	-	0	6	4	12	18	14	3
NC_000075.6	103364836	103367835	Cdv3	-	0	8	0	7	15	8	3
NC_000084.6	61035200	61038199	Cdx1	-	0	6	0	5	11	7	3
NC_000073.6	35117293	35120292	Cebpa	+	0	6	0	13	19	14	3
NC_000073.6	35055567	35058566	Cebpg	-	0	5	0	8	13	8	3
NC_000072.6	120664320	120667319	Cecr2	+	0	8	0	12	19	14	3
NC_000077.6	62538510	62541509	Cenpv	-	0	5	0	5	9	6	3
NC_000077.6	120085862	120088861	Cep131	-	0	4	0	6	10	7	3
NC_000078.6	112719529	112722528	Cep170b	+	0	4	0	4	7	4	3
NC_000081.6	86185337	86188336	Cerk	-	0	4	0	4	8	5	3
NC_000082.6	64850001	64853000	Cggbp1	+	0	8	4	10	17	11	3
NC_000082.6	93881894	93884893	Chaf1b	+	0	8	0	6	12	7	3
NC_000074.6	13867641	13870640	Champ1	+	0	4	0	4	8	4	3
NC_000068.7	129127700	129130699	Chchd5	+	0	4	0	3	7	4	3
NC_000074.6	123211789	123214788	Chmp1a	-	0	5	0	7	12	8	3
NC_000075.6	18290267	18293266	Chordc1	+	0	5	0	7	12	7	3
NC_000067.6	75478472	75481471	Chpf	-	0	7	4	13	19	14	3
NC_000073.6	66107515	66110514	Chsy1	+	0	5	0	9	14	9	3
NC_000068.7	127246817	127249816	Ciao1	-	0	4	0	7	11	8	3
NC_000074.6	94837373	94840372	Ciapin1	-	0	4	0	6	10	6	3
NC_000086.7	102251182	102254181	Cited1	-	0	5	0	5	10	5	3
NC_000076.6	17721228	17724227	Cited2	+	0	6	4	10	16	12	3
NC_000070.6	120664563	120667562	Cited4	+	0	4	0	9	12	9	3
NC_000083.6	85686356	85689355	CJ186046Rik	+	0	5	0	16	21	17	3
NC_000076.6	84532889	84535888	Ckap4	-	0	6	0	8	14	10	3
NC_000073.6	19603518	19606517	Clasrp	-	0	4	0	3	7	4	3
NC_000077.6	45849932	45852931	Clint1	+	0	4	0	3	7	4	3
NC_000071.6	134551469	134554468	Clip2	-	0	6	0	3	9	5	3
NC_000071.6	76304001	76307000	Clock	-	0	18	7	6	24	12	3
NC_000070.6	114986229	114989228	Cmpk1	-	0	5	0	5	9	6	3
NC_000074.6	104394808	104397807	Cmtm4	-	0	4	0	7	11	8	3
NC_000075.6	114780994	114783993	Cmtm7	-	0	4	0	6	10	7	3
NC_000075.6	114843153	114846152	Cmtm8	-	0	5	0	8	11	8	3
NC_000068.7	156310402	156313401	Cnbd2	+	0	7	0	5	12	6	3
NC_000085.6	5097522	5100521	Cnih2	-	0	5	0	4	9	5	3
NC_000074.6	11311827	11314826	Col4a1	-	0	4	0	5	9	5	3
NC_000074.6	11310805	11313804	Col4a2	+	0	4	0	5	9	5	3
NC_000079.6	96540735	96543734	Col4a3bp	+	0	4	0	11	14	12	3
NC_000077.6	59838838	59841837	Cops3	-	0	4	0	7	11	8	3
NC_000067.6	55050770	55053769	Coq10b	+	0	6	0	6	12	7	3
NC_000074.6	94836417	94839416	Coq9	+	0	4	0	6	10	6	3
NC_000077.6	77460320	77463319	Coro6	+	0	4	0	7	11	8	3
NC_000082.6	4678721	4681720	Coro7	-	0	4	0	3	7	4	3
NC_000077.6	90636184	90639183	Cox11	+	0	4	0	3	7	4	3
NC_000074.6	64692110	64695109	Cpe	-	0	4	0	3	7	3	3
NC_000085.6	37206620	37209619	Cpeb3	-	0	5	0	9	13	10	3
NC_000071.6	145165213	145168212	Cpsf4	+	0	4	0	7	10	8	3
NC_000068.7	92023171	92026170	Creb3l1	-	0	4	0	4	8	4	3
NC_000073.6	90440734	90443733	Crebzf	+	0	12	5	11	23	14	3
NC_000067.6	39650183	39653182	Creg2	-	0	4	0	7	10	8	3
NC_000083.6	78198232	78201231	Crim1	+	0	13	5	8	21	12	3
NC_000085.6	42430823	42433822	Crtac1	-	0	9	0	8	17	8	3
NC_000073.6	80687943	80690942	Crtc3	-	0	5	0	6	10	7	3
NC_000076.6	85184055	85187054	Cry1	-	0	7	4	8	15	10	3
NC_000084.6	53860082	53863081	Csnk1g3	+	0	10	0	4	14	6	3
NC_000081.6	100494240	100497239	Csrnp2	-	0	4	0	6	10	7	3
NC_000068.7	30593044	30596043	Cstad	+	0	5	0	6	9	6	3
NC_000071.6	33274005	33277004	Ctbp1	-	0	4	0	5	9	5	3
NC_000073.6	133122750	133125749	Ctbp2	-	0	11	5	14	23	16	3
NC_000074.6	105634538	105637537	Ctcf	+	0	6	0	14	19	15	3
NC_000084.6	35116912	35119911	Ctnna1	+	0	7	0	9	16	10	3
NC_000075.6	120931400	120934399	Ctnnb1	+	0	4	0	11	14	11	3
NC_000070.6	149516241	149519240	Ctnnbip1	+	0	4	0	1	5	2	3
NC_000081.6	30170593	30173592	Ctnnd2	+	0	8	0	9	17	9	3
NC_000070.6	120569277	120572276	Ctps	-	0	8	0	6	14	7	3
NW_004450260.1	102570	105569	Cuedc1	+	0	4	0	5	9	5	3
NC_000072.6	47451737	47454736	Cul1	+	0	5	0	9	14	9	3
NC_000067.6	80339691	80342690	Cul3	-	0	7	0	8	15	8	3
NC_000074.6	13103520	13106519	Cul4a	+	0	10	4	13	22	15	3
NC_000083.6	26938821	26941820	Cuta	-	0	4	0	7	11	8	3
NC_000071.6	136566491	136569490	Cux1	-	0	5	0	13	18	13	3
NC_000073.6	55839962	55842961	Cyfip1	+	0	8	0	5	13	7	3
NC_000070.6	123904047	123907046	D130007C19Rik	-	0	4	0	5	9	5	3
NT_187005.1	509476	512475	D17Wsu92e	-	0	4	0	4	8	5	3
NC_000083.6	24413514	24416513	D330041H03Rik	-	0	6	0	7	13	8	3
NC_000085.6	5386336	5389335	D330050I16Rik	+	0	5	0	5	10	6	3
NC_000075.6	120491548	120494547	D830035M03Rik	-	0	4	0	8	11	8	3
NC_000069.6	84039183	84042182	D930015E06Rik	-	0	5	0	8	13	8	3
NC_000077.6	51648954	51651953	D930048N14Rik	+	0	5	0	7	12	8	3
NC_000078.6	71307884	71310883	Dact1	+	0	7	0	8	14	10	3
NC_000075.6	108262959	108265958	Dag1	-	0	5	0	10	14	11	3
NC_000075.6	66156226	66159225	Dapk2	+	0	4	0	6	10	6	3
NC_000081.6	100613662	100616661	Dazap2	+	0	4	0	3	7	3	3
NC_000071.6	8421724	8424723	Dbf4	-	0	6	0	6	12	7	3
NC_000081.6	95653772	95656771	Dbx2	-	0	4	0	3	7	4	3
NC_000070.6	45340094	45343093	Dcaf10	+	0	10	0	7	17	8	3
NC_000081.6	39110874	39113873	Dcaf13	+	0	4	0	9	12	9	3
NC_000069.6	145756692	145759691	Ddah1	+	0	6	0	4	10	6	3
NC_000078.6	13248175	13251174	Ddx1	-	0	5	0	4	8	4	3
NC_000067.6	136413271	136416270	Ddx59	+	0	4	0	1	5	2	3
NC_000072.6	39557167	39560166	Dennd2a	-	0	4	0	7	11	8	3
NC_000069.6	90262923	90265922	Dennd4b	+	0	4	0	6	9	6	3
NC_000073.6	109959471	109962470	Dennd5a	-	0	4	0	5	9	6	3
NC_000079.6	108314013	108317012	Depdc1b	+	0	4	0	7	11	7	3
NC_000081.6	82015221	82018220	Desi1	-	0	4	0	4	8	4	3
NW_004450262.2	301141	304140	Dgcr8	-	0	6	0	3	9	4	3
NC_000067.6	87851273	87854272	Dgkd	+	0	4	0	12	16	13	3
NW_019168532.1	13598	16597	Dgkk	+	0	4	0	5	9	5	3
NC_000077.6	78030286	78033285	Dhrs13	+	0	4	0	6	10	6	3
NT_166291.1	13814	16813	Dhrsx	+	0	8	0	5	13	6	3
NT_187004.1	2210913	2213912	Dhx16	+	0	4	0	1	5	2	3
NC_000084.6	37934635	37937634	Diaph1	-	0	4	0	5	9	6	3
NC_000078.6	104751325	104754324	Dicer1	-	0	7	0	7	14	9	3
NC_000075.6	64340427	64343426	Dis3l	-	0	7	0	9	16	10	3
NC_000083.6	69967060	69970059	Dlgap1	+	0	5	0	5	10	6	3
NC_000085.6	25608246	25611245	Dmrt3	+	0	5	0	11	16	12	3
NC_000070.6	109975782	109978781	Dmrta2	+	0	10	0	11	20	12	3
NC_000070.6	109976814	109979813	Dmrta2os	-	0	10	0	9	19	10	3
NC_000071.6	9160777	9163776	Dmtf1	-	0	6	0	4	9	5	3
NC_000073.6	19074090	19077089	Dmwd	+	0	6	0	6	11	7	3
NC_000074.6	85554272	85557271	Dnaja2	-	0	9	0	8	16	8	3
NC_000075.6	104262173	104265172	Dnajc13	-	0	4	0	4	8	5	3
NC_000080.6	118935932	118938931	Dnajc3	+	0	6	0	6	11	6	3
NC_000078.6	40443957	40446956	Dock4	+	0	5	0	11	15	12	3
NC_000080.6	67932573	67935572	Dock5	-	0	7	0	9	15	10	3
NC_000084.6	89768137	89771136	Dok6	-	0	4	0	2	6	3	3
NC_000075.6	86465154	86468153	Dopey1	+	0	6	0	3	9	5	3
NC_000082.6	93709907	93712906	Dopey2	+	0	4	0	6	10	6	3
NC_000078.6	83486737	83489736	Dpf3	-	0	5	0	10	14	11	3
NC_000070.6	11321506	11324505	Dpy19l4	-	0	4	0	4	8	5	3
NC_000084.6	43437287	43440286	Dpysl3	-	0	4	0	5	9	5	3
NC_000075.6	49338428	49341427	Drd2	+	0	7	0	9	16	11	3
NT_187016.1	115247	118246	Dscam	-	0	6	0	5	11	7	3
NC_000067.6	33906213	33909212	Dst	+	0	4	0	3	7	4	3
NC_000084.6	23308020	23311019	Dtna	+	0	5	0	6	11	7	3
NC_000079.6	45001097	45004096	Dtnbp1	-	0	4	0	7	10	8	3
NC_000072.6	134791629	134794628	Dusp16	-	0	6	0	8	14	8	3
NC_000083.6	34835019	34838018	Dxo	+	0	7	4	11	18	13	3
NC_000071.6	115299991	115302990	Dynll1	-	0	4	0	9	13	10	3
NT_039634.4	451264	454263	Dyrk1a	+	0	8	0	12	20	13	3
NC_000076.6	22148739	22151738	E030030I06Rik	-	0	5	0	14	18	15	3
NC_000077.6	97628717	97631716	E130012A19Rik	-	0	8	0	8	15	10	3
NC_000070.6	101355249	101358248	E130102H24Rik	-	0	4	0	9	13	10	3
NC_000072.6	67034599	67037598	E230016M11Rik	+	0	4	0	9	13	9	3
NC_000079.6	29985120	29988119	E2f3	-	0	4	0	12	16	12	3
NC_000076.6	110743424	110746423	E2f7	+	0	4	0	8	12	8	3
NC_000080.6	31493079	31496078	Eaf1	+	0	4	0	9	12	10	3
NC_000082.6	36873827	36876826	Eaf2	-	0	4	0	5	9	6	3
NC_000068.7	130293249	130296248	Ebf4	+	0	5	0	9	14	10	3
NC_000072.6	108826558	108829557	Edem1	+	0	4	0	8	10	8	3
NC_000076.6	95938661	95941660	Eea1	+	0	6	0	7	12	8	3
NC_000083.6	62880318	62883317	Efna5	-	0	11	6	19	30	22	3
NC_000074.6	8660261	8663260	Efnb2	-	0	6	0	13	18	13	3
NC_000078.6	4038095	4041094	Efr3b	-	0	7	0	5	12	7	3
NC_000084.6	34859207	34862206	Egr1	+	0	4	0	12	15	13	3
NC_000075.6	36796394	36799393	Ei24	-	0	5	0	4	9	5	3
NC_000074.6	27258327	27261326	Eif4ebp1	+	0	4	0	7	11	8	3
NC_000082.6	20670720	20673719	Eif4g1	+	0	7	0	6	12	6	3
NC_000073.6	111082031	111085030	Eif4g2	-	0	4	0	11	15	11	3
NC_000078.6	111536101	111539100	Eif5	+	0	7	0	10	17	11	3
NC_000080.6	79479194	79482193	Elf1	+	0	5	0	11	16	12	3
NC_000069.6	51339921	51342920	Elf2	-	0	12	6	15	27	18	3
NC_000071.6	139905641	139908640	Elfn1	+	0	7	0	9	15	9	3
NC_000081.6	78717873	78720872	Elfn2	-	0	6	0	12	18	14	3
NC_000079.6	20088507	20091506	Elmo1	+	0	5	0	9	14	10	3
NC_000079.6	41219404	41222403	Elovl2	-	0	4	0	4	7	5	3
NC_000085.6	8927694	8930693	Eml3	+	0	6	0	8	14	10	3
NC_000071.6	28163696	28166695	En2	+	0	8	0	8	16	9	3
NC_000067.6	182018981	182021980	Enah	-	0	5	0	10	15	11	3
NC_000070.6	132074580	132077579	Epb41	-	0	6	0	7	13	9	3
NC_000070.6	57142169	57145168	Epb41l4b	-	0	14	6	8	22	11	3
NC_000068.7	49449486	49452485	Epc2	+	0	6	0	11	17	12	3
NC_000067.6	77514104	77517103	Epha4	-	0	6	0	15	20	16	3
NC_000070.6	28811047	28814046	Epha7	+	0	5	0	7	10	8	3
NC_000076.6	11341445	11344444	Epm2a	+	0	4	0	4	8	5	3
NC_000077.6	61578720	61581719	Epn2	-	0	6	0	8	14	9	3
NC_000070.6	109278256	109281255	Eps15	+	0	5	0	7	11	8	3
NC_000079.6	74637624	74640623	Erap1	+	0	4	0	4	7	4	3
NC_000079.6	103919587	103922586	Erbb2ip	-	0	7	0	12	19	14	3
NC_000079.6	108156712	108159711	Ercc8	+	0	5	0	7	12	8	3
NC_000077.6	106486797	106489796	Ern1	-	0	4	0	8	11	8	3
NC_000067.6	187606791	187609790	Esrrg	+	0	5	0	14	19	15	3
NC_000084.6	34931004	34934003	Etf1	-	0	4	0	7	10	7	3
NC_000072.6	143164866	143167865	Etnk1	+	0	7	0	14	21	15	3
NC_000082.6	95700407	95703406	Ets2	+	0	6	0	6	11	7	3
NC_000082.6	22438571	22441570	Etv5	-	0	4	0	9	10	9	3
NC_000078.6	108552720	108555719	Evl	+	0	7	0	11	18	13	3
NC_000074.6	124896706	124899705	Exoc8	-	0	5	0	9	13	9	3
NC_000081.6	53345184	53348183	Ext1	-	0	5	0	9	13	10	3
NC_000068.7	165593028	165596027	Eya2	+	0	4	0	5	8	6	3
NC_000067.6	171435561	171438560	F11r	+	0	5	0	5	10	6	3
NC_000077.6	76026783	76029782	Fam101b	-	0	5	0	10	15	11	3
NC_000071.6	121847001	121850000	Fam109a	+	0	4	0	7	11	7	3
NC_000080.6	70598836	70601835	Fam160b2	-	0	4	0	5	9	5	3
NC_000067.6	156204456	156207455	Fam163a	-	0	4	0	3	7	3	3
NC_000067.6	95311628	95314627	Fam174a	+	0	11	0	1	12	1	3
NC_000078.6	64963742	64966741	Fam179b	+	0	5	0	8	13	9	3
NC_000073.6	65155565	65158564	Fam189a1	-	0	10	0	11	21	11	3
NC_000073.6	134937431	134940430	Fam196a	-	0	6	0	5	11	6	3
NC_000080.6	34309596	34312595	Fam35a	-	0	6	0	8	14	10	3
NC_000081.6	64059453	64062452	Fam49b	-	0	7	0	6	13	7	3
NC_000073.6	132812197	132815196	Fam53b	-	0	8	0	7	14	8	3
NC_000070.6	132922129	132925128	Fam76a	-	0	5	0	5	10	5	3
NC_000079.6	46667443	46670442	Fam8a1	+	0	4	0	5	8	6	3
NC_000070.6	12171025	12174024	Fam92a	-	0	8	0	4	12	4	3
NC_000084.6	58209565	58212564	Fbn2	-	0	4	0	10	14	11	3
NC_000080.6	103098540	103101539	Fbxl3	-	0	9	0	9	17	10	3
NC_000071.6	43781150	43784149	Fbxl5	-	0	4	0	5	8	6	3
NC_000070.6	45083648	45086647	Fbxo10	-	0	5	0	6	11	7	3
NC_000083.6	88065093	88068092	Fbxo11	-	0	6	0	9	15	11	3
NC_000076.6	5804466	5807465	Fbxo5	-	0	4	0	6	10	6	3
NC_000070.6	148151136	148154135	Fbxo6	-	0	5	0	4	8	4	3
NC_000073.6	101106711	101109710	Fchsd2	+	0	4	0	5	9	5	3
NC_000075.6	62810649	62813648	Fem1b	-	0	4	0	7	10	7	3
NC_000069.6	37346477	37349476	Fgf2	+	0	6	0	1	7	2	3
NC_000085.6	36918600	36921599	Fgfbp3	-	0	5	0	3	8	3	3
NC_000074.6	105346971	105349970	Fhod1	-	0	4	0	12	15	12	3
NC_000068.7	64097039	64100038	Fign	-	0	9	0	3	12	5	3
NC_000072.6	54592699	54595698	Fkbp14	-	0	4	0	4	8	5	3
NC_000072.6	128437632	128440631	Fkbp4	-	0	5	0	7	12	8	3
NC_000072.6	56830059	56833058	Fkbp9	+	0	4	0	2	5	3	3
NC_000085.6	7165031	7168030	Flrt1	-	0	4	0	5	9	6	3
NC_000077.6	49607679	49610678	Flt4	+	0	4	0	7	10	8	3
NC_000068.7	31141029	31144028	Fnbp1	-	0	7	0	7	14	9	3
NC_000068.7	90743370	90746369	Fnbp4	+	0	6	0	4	10	5	3
NC_000073.6	19309227	19312226	Fosb	-	0	5	0	8	13	8	3
NC_000071.6	32134472	32137471	Fosl2	+	0	4	0	11	14	11	3
NC_000079.6	98352245	98355244	Foxd1	+	0	5	0	9	14	9	3
NW_019168509.1	28753	31752	Foxd3	+	0	4	0	11	15	12	3
NC_000070.6	114925014	114928013	Foxe3	-	0	4	0	8	11	8	3
NC_000077.6	121257987	121260986	Foxk2	+	0	4	0	8	12	9	3
NC_000072.6	128360994	128363993	Foxm1	+	0	10	0	9	18	11	3
NC_000083.6	88438712	88441711	Foxn2	+	0	8	4	9	15	10	3
NC_000071.6	114273601	114276600	Foxn4	-	0	4	0	9	13	10	3
NC_000076.6	42275747	42278746	Foxo3	-	0	8	0	12	18	14	3
NC_000070.6	120286262	120289261	Foxo6	-	0	8	5	10	17	11	3
NC_000085.6	41827970	41830969	Frat1	+	0	4	0	10	14	10	3
NC_000085.6	41847133	41850132	Frat2	-	0	5	0	11	15	12	3
NC_000069.6	53656356	53659355	Frem2	-	0	4	0	9	13	9	3
NC_000068.7	121806088	121809087	Frmd5	-	0	5	0	6	11	6	3
NC_000070.6	45182416	45185415	Frmpd1	+	0	4	0	7	11	8	3
NC_000071.6	73255629	73258628	Fryl	-	0	6	0	11	17	12	3
NC_000082.6	32875581	32878580	Fyttd1	+	0	4	0	8	11	9	3
NC_000071.6	128599106	128602105	Fzd10	+	0	8	4	18	26	19	3
NC_000067.6	180811672	180814671	G370120E05Rik	+	0	4	0	11	12	11	3
NC_000071.6	92136738	92139737	G3bp2	-	0	6	0	7	13	8	3
NC_000073.6	97079751	97082750	Gab2	+	0	7	0	6	13	8	3
NC_000083.6	37043965	37046964	Gabbr1	+	0	4	0	5	9	5	3
NC_000072.6	67036408	67039407	Gadd45a	-	0	4	0	8	12	8	3
NC_000074.6	124229394	124232393	Galnt2	+	0	6	0	8	14	9	3
NC_000068.7	66124231	66127230	Galnt3	-	0	4	0	8	11	8	3
NC_000082.6	91646199	91649198	Gart	-	0	4	0	12	16	12	3
NC_000079.6	60176536	60179535	Gas1	-	0	7	0	10	17	10	3
NC_000077.6	67453024	67456023	Gas7	+	0	10	5	8	15	10	3
NC_000071.6	3646937	3649936	Gatad1	-	0	5	0	5	10	6	3
NC_000077.6	4216161	4219160	Gatsl3	+	0	5	0	11	14	12	3
NC_000071.6	129723045	129726044	Gbas	+	0	5	0	3	8	4	3
NC_000071.6	24525849	24528848	Gbx1	-	0	7	0	11	16	11	3
NC_000069.6	122243557	122246556	Gclm	+	0	8	0	6	14	7	3
NC_000071.6	115563219	115566218	Gcn1l1	+	0	4	0	6	10	7	3
NC_000083.6	24695229	24698228	Gfer	-	0	9	0	3	12	4	3
NC_000079.6	43303173	43306172	Gfod1	-	0	8	0	10	17	12	3
NC_000067.6	87324981	87327980	Gigyf2	+	0	5	0	7	12	8	3
NC_000072.6	8507600	8510599	Glcci1	+	0	8	0	8	16	10	3
NC_000085.6	28679266	28682265	Glis3	-	0	8	0	3	11	5	3
NC_000080.6	30999347	31002346	Glt8d1	+	0	4	0	9	13	10	3
NC_000080.6	34308727	34311726	Glud1	+	0	6	0	8	14	10	3
NC_000072.6	128436757	128439756	Gm10069	+	0	5	0	7	12	8	3
NC_000084.6	57354628	57357627	Gm10266	-	0	4	0	3	7	3	3
NC_000075.6	57070967	57073966	Gm10658	-	0	5	0	10	14	10	3
NC_000077.6	77928289	77931288	Gm11190	-	0	7	0	3	10	5	3
NC_000077.6	11684611	11687610	Gm11999	-	0	6	0	7	13	7	3
NC_000077.6	75793809	75796808	Gm12339	+	0	6	0	11	15	12	3
NC_000070.6	55530867	55533866	Gm12506	+	0	4	0	16	20	16	3
NC_000073.6	34653570	34656569	Gm12781	+	0	9	0	12	21	13	3
NC_000070.6	123663881	123666880	Gm12925	+	0	12	5	8	19	11	3
NC_000070.6	133813238	133816237	Gm12974	+	0	8	0	16	24	16	3
NT_187023.1	839660	842659	Gm12976	+	0	4	0	6	9	6	3
NC_000070.6	131919030	131922029	Gm12992	-	0	14	4	17	30	18	3
NC_000070.6	154635508	154638507	Gm13111	+	0	9	4	16	23	17	3
NC_000068.7	20966874	20969873	Gm13375	+	0	5	0	14	18	14	3
NC_000068.7	68471050	68474049	Gm13596	+	0	5	0	7	12	7	3
NC_000068.7	93956101	93959100	Gm13889	-	0	6	0	5	11	6	3
NC_000068.7	156838821	156841820	Gm14230	-	0	6	0	13	18	14	3
NC_000068.7	168763437	168766436	Gm14261	+	0	4	0	11	14	11	3
NC_000068.7	131559614	131562613	Gm14285	+	0	4	0	8	12	8	3
NC_000086.7	102250651	102253650	Gm14858	+	0	4	0	3	7	3	3
NC_000073.6	44589620	44592619	Gm15396	-	0	6	0	6	12	8	3
NC_000082.6	35982252	35985251	Gm15564	-	0	5	0	8	11	9	3
NC_000081.6	86183723	86186722	Gm15569	+	0	5	0	6	11	7	3
NC_000072.6	145248552	145251551	Gm15706	+	0	5	0	6	11	7	3
NC_000067.6	58503135	58506134	Gm15834	+	0	4	0	8	12	9	3
NC_000079.6	34650923	34653922	Gm15908	+	0	5	0	13	18	14	3
NC_000069.6	35931049	35934048	Gm15952	+	0	9	0	7	16	7	3
NC_000074.6	107030193	107033192	Gm16208	-	0	4	0	6	10	6	3
NC_000081.6	79740698	79743697	Gm16576	+	0	6	0	6	12	7	3
NC_000078.6	108554619	108557618	Gm16596	-	0	6	0	5	11	7	3
NC_000074.6	46738516	46741515	Gm16675	-	0	10	5	17	25	19	3
NC_000083.6	29886903	29889902	Gm16758	+	0	7	5	19	25	20	3
NC_000075.6	63397376	63400375	Gm16759	+	0	4	0	6	10	6	3
NC_000075.6	22069002	22072001	Gm16845	+	0	5	0	5	9	5	3
NC_000076.6	54073922	54076921	Gm16998	+	0	7	0	10	17	11	3
NC_000078.6	23968454	23971453	Gm17330	-	0	4	0	8	12	8	3
NC_000080.6	69281756	69284755	Gm20236	-	0	6	0	4	10	4	3
NC_000081.6	82897080	82900079	Gm20324	+	0	8	0	8	16	10	3
NC_000078.6	23314394	23317393	Gm20472	-	0	5	0	8	13	8	3
NC_000073.6	141948713	141951712	Gm20501	-	0	8	0	11	19	13	3
NC_000073.6	65861173	65864172	Gm20684	-	0	8	0	8	14	8	3
NW_004058052.1	411582	414581	Gm23450	+	0	4	0	4	8	5	3
NC_000075.6	119893913	119896912	Gm2449	-	0	6	0	4	10	6	3
NC_000067.6	171436444	171439443	Gm26641	-	0	5	0	6	10	7	3
NC_000081.6	54949975	54952974	Gm26684	+	0	5	0	5	10	6	3
NC_000074.6	83898772	83901771	Gm26721	-	0	5	0	19	24	20	3
NC_000076.6	3364933	3367932	Gm26752	-	0	4	0	6	10	7	3
NC_000078.6	99561841	99564840	Gm26839	+	0	4	0	7	11	8	3
NC_000068.7	126673613	126676612	Gm27003	+	0	8	0	7	15	9	3
NC_000068.7	38349649	38352648	Gm27197	-	0	4	0	14	18	14	3
NC_000072.6	141249010	141252009	Gm28523	-	0	6	0	7	13	7	3
NC_000067.6	132188089	132191088	Gm29695	+	0	6	0	6	12	8	3
NC_000071.6	102068197	102071196	Gm29707	+	0	6	0	10	16	12	3
NC_000068.7	180170872	180173871	Gm29886	-	0	4	0	9	13	10	3
NC_000080.6	20792185	20795184	Gm30108	+	0	9	0	5	14	8	3
NC_000083.6	71781563	71784562	Gm30140	-	0	6	0	1	7	2	3
NC_000068.7	130294113	130297112	Gm30169	-	0	4	0	8	12	8	3
NC_000071.6	5378777	5381776	Gm30267	+	0	6	0	10	16	10	3
NC_000069.6	84038221	84041220	Gm30352	+	0	5	0	8	13	8	3
NC_000070.6	106315153	106318152	Gm30429	-	0	5	0	11	15	11	3
NC_000076.6	79715909	79718908	Gm30480	-	0	4	0	9	12	9	3
NC_000081.6	64381168	64384167	Gm30563	+	0	8	0	5	13	6	3
NC_000068.7	131490750	131493749	Gm30679	-	0	7	0	5	12	5	3
NC_000076.6	29359396	29362395	Gm30698	+	0	4	0	6	9	6	3
NC_000067.6	192136060	192139059	Gm30956	+	0	12	4	13	24	16	3
NC_000085.6	11911232	11914231	Gm31092	-	0	4	0	6	9	6	3
NC_000074.6	80877938	80880937	Gm31105	+	0	4	0	10	14	11	3
NC_000080.6	36966871	36969870	Gm31131	+	0	7	0	7	14	7	3
NC_000068.7	30473447	30476446	Gm31291	+	0	5	0	9	13	9	3
NC_000075.6	68652792	68655791	Gm31325	-	0	6	0	12	17	13	3
NC_000078.6	83919999	83922998	Gm31386	+	0	5	0	10	14	10	3
NC_000081.6	95652568	95655567	Gm31690	+	0	4	0	4	8	5	3
NC_000067.6	180254376	180257375	Gm31728	+	0	4	0	5	9	6	3
NC_000085.6	55742226	55745225	Gm31734	-	0	4	0	14	16	14	3
NC_000081.6	30171194	30174193	Gm31953	+	0	8	0	10	17	10	3
NC_000082.6	95700935	95703934	Gm31989	-	0	6	0	6	11	7	3
NC_000077.6	68431039	68434038	Gm32046	-	0	4	0	5	9	6	3
NC_000073.6	30586902	30589901	Gm32082	+	0	8	0	11	19	12	3
NC_000083.6	78199085	78202084	Gm32282	-	0	13	5	11	24	15	3
NC_000068.7	19656898	19659897	Gm3230	-	0	7	0	9	16	11	3
NC_000072.6	124855807	124858806	Gm32404	+	0	4	0	6	10	7	3
NC_000082.6	30069439	30072438	Gm32998	-	0	6	0	7	13	9	3
NC_000073.6	65369642	65372641	Gm33068	+	0	9	0	5	14	8	3
NC_000074.6	54076774	54079773	Gm33153	-	0	4	0	3	7	3	3
NT_187027.1	2575304	2578303	Gm33257	+	0	5	0	5	7	5	3
NC_000083.6	24139642	24142641	Gm33409	+	0	7	0	3	9	5	3
NC_000081.6	40653156	40656155	Gm33431	-	0	4	0	9	13	10	3
NC_000073.6	66426647	66429646	Gm33515	+	0	4	0	7	11	7	3
NC_000074.6	12755989	12758988	Gm33587	-	0	4	0	10	13	11	3
NC_000081.6	97829245	97832244	Gm33636	+	0	8	0	4	12	6	3
NT_187023.1	322305	325304	Gm33712	-	0	4	0	4	7	5	3
NC_000077.6	102294813	102297812	Gm33851	+	0	6	0	11	16	11	3
NC_000078.6	108792415	108795414	Gm34220	-	0	6	0	12	18	14	3
NC_000083.6	4906010	4909009	Gm34507	+	0	5	0	7	12	7	3
NC_000071.6	98853508	98856507	Gm34563	-	0	4	0	8	12	9	3
NC_000074.6	60630886	60633885	Gm34730	-	0	5	0	8	12	9	3
NC_000084.6	32161760	32164759	Gm34806	-	0	5	0	3	8	4	3
NC_000080.6	60376455	60379454	Gm34935	-	0	4	0	10	14	10	3
NC_000079.6	59821586	59824585	Gm34961	+	0	6	0	6	11	6	3
NC_000079.6	98813741	98816740	Gm34995	+	0	4	0	8	11	8	3
NC_000071.6	15933066	15936065	Gm3510	-	0	5	0	11	15	11	3
NC_000074.6	88520221	88523220	Gm35162	-	0	5	0	8	13	9	3
NC_000076.6	120977366	120980365	Gm35235	+	0	11	4	12	23	14	3
NC_000083.6	45571315	45574314	Gm35399	+	0	6	0	9	14	10	3
NC_000072.6	108827285	108830284	Gm35417	-	0	4	0	9	11	9	3
NC_000070.6	100094644	100097643	Gm35701	-	0	5	0	6	10	6	3
NC_000086.7	51679824	51682823	Gm35727	+	0	5	0	9	11	9	3
NC_000074.6	123651737	123654736	Gm35874	-	0	4	0	5	9	6	3
NC_000070.6	132047534	132050533	Gm36157	+	0	7	0	7	14	8	3
NC_000077.6	107026740	107029739	Gm36273	-	0	4	0	7	10	7	3
NC_000085.6	32755613	32758612	Gm36566	-	0	7	0	18	25	20	3
NC_000073.6	82866075	82869074	Gm36584	-	0	7	0	16	23	17	3
NC_000081.6	102980243	102983242	Gm36878	-	0	7	0	5	12	6	3
NC_000086.7	60891764	60894763	Gm38438	+	0	7	0	9	16	10	3
NC_000075.6	50773966	50776965	Gm38476	-	0	6	0	3	9	5	3
NC_000076.6	42581758	42584757	Gm38491	+	0	8	0	15	23	15	3
NC_000070.6	151042820	151045819	Gm38529	+	0	5	0	5	10	6	3
NC_000069.6	119781820	119784819	Gm38548	+	0	4	0	8	11	9	3
NC_000067.6	87852270	87855269	Gm38609	-	0	4	0	12	16	13	3
NC_000067.6	181209962	181212961	Gm38664	+	0	8	0	12	18	14	3
NC_000071.6	144254221	144257220	Gm38675	+	0	7	0	9	16	11	3
NC_000078.6	19881474	19884473	Gm38702	-	0	4	0	8	12	9	3
NC_000072.6	108211963	108214962	Gm38872	-	0	4	0	9	12	9	3
NC_000077.6	95823581	95826580	Gm38958	-	0	5	0	9	13	9	3
NC_000076.6	53595378	53598377	Gm3902	+	0	9	0	5	14	7	3
NC_000077.6	101783477	101786476	Gm39392	+	0	4	0	12	14	12	3
NC_000075.6	99435014	99438013	Gm39412	+	0	5	0	5	10	6	3
NC_000075.6	121994114	121997113	Gm39463	+	0	4	0	6	9	7	3
NC_000077.6	117265234	117268233	Gm39478	-	0	5	0	10	15	10	3
NC_000073.6	112022496	112025495	Gm3960	-	0	5	0	7	12	8	3
NC_000067.6	80338913	80341912	Gm39667	+	0	7	0	8	15	8	3
NC_000067.6	184997578	185000577	Gm39728	+	0	6	0	5	11	7	3
NC_000068.7	18063242	18066241	Gm39762	-	0	7	0	6	12	8	3
NC_000068.7	33637682	33640681	Gm39790	+	0	6	0	13	18	13	3
NC_000077.6	58976211	58979210	Gm39828	-	0	5	0	12	17	13	3
NC_000068.7	75658183	75661182	Gm39859	-	0	5	0	8	13	8	3
NC_000068.7	168079727	168082726	Gm39990	-	0	4	0	7	11	7	3
NC_000069.6	122291609	122294608	Gm40190	+	0	7	0	8	15	9	3
NC_000070.6	109279109	109282108	Gm40225	-	0	5	0	7	11	8	3
NC_000071.6	38682923	38685922	Gm40291	+	0	4	0	6	10	6	3
NC_000076.6	44267244	44270243	Gm40637	-	0	5	0	6	11	7	3
NT_187027.1	1212236	1215235	Gm40706	-	0	4	0	11	14	11	3
NC_000076.6	88378134	88381133	Gm40733	-	0	5	0	7	12	8	3
NC_000076.6	94513780	94516779	Gm40743	-	0	8	0	10	17	12	3
NC_000076.6	108331734	108334733	Gm40755	-	0	8	0	12	20	13	3
NC_000078.6	23633846	23636845	Gm40862	-	0	10	4	11	21	13	3
NC_000080.6	100283723	100286722	Gm41231	+	0	4	0	13	17	14	3
NC_000081.6	80010302	80013301	Gm41361	+	0	4	0	8	11	9	3
NC_000083.6	66516861	66519860	Gm41608	+	0	5	0	9	13	9	3
NC_000084.6	36513946	36516945	Gm41698	+	0	4	0	6	10	6	3
NC_000084.6	53462805	53465804	Gm41726	-	0	5	0	16	18	16	3
NC_000084.6	58208295	58211294	Gm41741	+	0	4	0	11	15	11	3
NC_000067.6	89579816	89582815	Gm41914	-	0	4	0	12	16	12	3
NC_000070.6	3677049	3680048	Gm42250	-	0	4	0	5	8	5	3
NC_000070.6	141443659	141446658	Gm42337	-	0	6	0	7	11	7	3
NC_000080.6	75843965	75846964	Gm4285	-	0	8	0	13	21	14	3
NC_000085.6	12795124	12798123	Gm44505	-	0	4	0	6	10	7	3
NC_000082.6	49854214	49857213	Gm4633	-	0	4	0	9	13	10	3
NC_000081.6	11904525	11907524	Gm5144	+	0	4	0	8	11	8	3
NC_000072.6	87979683	87982682	Gm5577	+	0	6	0	8	13	9	3
NC_000078.6	19385533	19388532	Gm5784	+	0	4	0	12	15	12	3
NC_000071.6	130222064	130225063	Gm6598	-	0	4	0	3	7	4	3
NC_000071.6	76302882	76305881	Gm7467	+	0	20	8	9	28	15	3
NC_000071.6	43234355	43237354	Gm7854	-	0	7	0	8	14	9	3
NC_000080.6	26041964	26044963	Gm9780	-	0	7	0	4	11	5	3
NC_000084.6	74063103	74066102	Gm9925	+	0	10	5	12	20	14	3
NC_000074.6	34963883	34966882	Gm9939	+	0	6	0	3	9	5	3
NC_000071.6	90364997	90367996	Gm9958	+	0	4	0	11	15	11	3
NC_000071.6	31240931	31243930	Gm9970	-	0	4	0	7	11	8	3
NC_000072.6	86732400	86735399	Gmcl1	-	0	5	0	7	12	7	3
NC_000076.6	81544047	81547046	Gna11	-	0	4	0	6	10	6	3
NC_000085.6	16130831	16133830	Gnaq	+	0	7	0	10	16	11	3
NC_000069.6	146497836	146500835	Gng5	+	0	6	0	8	13	9	3
NC_000083.6	35977955	35980954	Gnl1	+	0	5	0	10	15	11	3
NC_000082.6	36873173	36876172	Golgb1	+	0	4	0	5	9	6	3
NC_000072.6	142385210	142388209	Golt1b	+	0	4	0	7	11	8	3
NC_000068.7	70659509	70662508	Gorasp2	+	0	4	0	6	9	6	3
NC_000085.6	43523606	43526605	Got1	-	0	6	0	6	12	7	3
NC_000074.6	23207454	23210453	Gpat4	-	0	6	0	9	15	11	3
NC_000067.6	187213393	187216392	Gpatch2	+	0	4	0	1	5	1	3
NC_000070.6	116555155	116558154	Gpbp1l1	+	0	6	0	9	15	10	3
NC_000078.6	78224092	78227091	Gphn	+	0	8	0	8	14	9	3
NC_000072.6	99690679	99693678	Gpr27	+	0	5	0	13	17	14	3
NC_000079.6	54748875	54751874	Gprin1	-	0	7	0	7	14	8	3
NC_000077.6	120782260	120785259	Gps1	+	0	7	0	8	15	8	3
NC_000070.6	125488206	125491205	Grik3	+	0	7	0	13	19	15	3
NC_000075.6	42944155	42947154	Grik4	-	0	6	0	5	11	6	3
NC_000076.6	119451835	119454834	Grip1	+	0	8	0	9	17	11	3
NC_000072.6	91842955	91845954	Grip2	-	0	4	0	9	12	9	3
NC_000079.6	55443072	55446071	Grk6	+	0	5	0	10	15	10	3
NC_000075.6	106655110	106658109	Grm2	-	0	5	0	3	8	4	3
NC_000072.6	28134906	28137905	Grm8	-	0	5	0	5	10	5	3
NC_000082.6	17914060	17917059	Gsc2	-	0	4	0	5	9	5	3
NC_000074.6	120226827	120229826	Gse1	+	0	8	0	10	18	10	3
NC_000077.6	73137295	73140294	Gsg2	-	0	5	0	6	11	6	3
NC_000082.6	11253326	11256325	Gspt1	-	0	6	0	11	16	12	3
NC_000071.6	147186696	147189695	Gsx1	+	0	4	0	11	13	11	3
NC_000072.6	113076245	113079244	Gt(ROSA)26Sor	-	0	7	4	12	18	13	3
NC_000071.6	134313761	134316760	Gtf2i	-	0	4	0	8	11	9	3
NC_000081.6	85857690	85860689	Gtse1	+	0	6	0	5	10	6	3
NC_000081.6	79026212	79029211	H1f0	+	0	6	0	11	17	13	3
NC_000072.6	87980483	87983482	H1fx	-	0	6	0	8	13	9	3
NC_000083.6	35377617	35380616	H2-Q4	+	0	5	0	4	9	5	3
NT_187004.1	1753177	1756176	H2-Q7	+	0	4	0	6	10	7	3
NC_000079.6	56134627	56137626	H2afy	-	0	7	4	8	14	10	3
NW_019168530.1	142829	145828	Haus1	-	0	4	0	2	6	3	3
NC_000084.6	36514806	36517805	Hbegf	-	0	4	0	5	9	5	3
NC_000078.6	31949536	31952535	Hbp1	-	0	5	0	3	8	4	3
NC_000075.6	58821512	58824511	Hcn4	+	0	10	7	14	23	16	3
NC_000070.6	129541647	129544646	Hdac1	-	0	5	0	6	11	7	3
NC_000076.6	36972544	36975543	Hdac2	+	0	6	0	10	15	11	3
NC_000078.6	51828537	51831536	Hectd1	-	0	7	0	13	20	13	3
NC_000075.6	25150782	25153781	Herpud2	-	0	6	0	6	12	7	3
NC_000082.6	30063357	30066356	Hes1	+	0	7	4	10	16	12	3
NC_000077.6	69116710	69119709	Hes7	+	0	8	0	9	17	11	3
NC_000075.6	59537545	59540544	Hexa	+	0	4	0	7	11	8	3
NC_000077.6	103130008	103133007	Hexim2	+	0	4	0	5	8	6	3
NW_016097322.1	239642	242641	Hhex	+	0	5	0	10	15	11	3
NC_000077.6	115366752	115369751	Hid1	-	0	7	0	8	15	9	3
NC_000075.6	121857358	121860357	Higd1a	-	0	4	0	6	9	6	3
NC_000077.6	54864438	54867437	Hint1	+	0	5	0	5	10	6	3
NC_000072.6	38875191	38878190	Hipk2	-	0	10	0	7	17	8	3
NC_000068.7	104493490	104496489	Hipk3	-	0	5	0	10	15	10	3
NC_000079.6	23744734	23747733	Hist1h2bb	+	0	4	0	1	5	1	3
NC_000079.6	23744522	23747521	Hist1h3c	-	0	4	0	1	5	1	3
NC_000079.6	23760250	23763249	Hist1h4a	-	0	4	0	6	9	6	3
NC_000076.6	81349512	81352511	Hmg20b	-	0	4	0	6	10	7	3
NC_000083.6	27554574	27557573	Hmga1	+	0	7	5	16	23	18	3
NC_000071.6	149052058	149055057	Hmgb1	-	0	4	0	10	13	11	3
NC_000074.6	74991518	74994517	Hmgxb4	+	0	5	0	7	12	7	3
NC_000068.7	75657216	75660215	Hnrnpa3	+	0	5	0	8	13	8	3
NC_000076.6	63022933	63025932	Hnrnph3	-	0	6	0	8	14	10	3
NC_000079.6	93301247	93304246	Homer1	+	0	5	0	6	11	6	3
NC_000073.6	81705926	81708925	Homer2	-	0	7	4	4	11	6	3
NC_000072.6	52190704	52193703	Hoxa4	-	0	4	0	8	11	8	3
NC_000081.6	102952526	102955525	Hoxc11	+	0	4	0	8	11	8	3
NC_000068.7	74695763	74698762	Hoxd9	+	0	6	0	13	18	13	3
NC_000080.6	70552056	70555055	Hr	+	0	9	0	8	16	8	3
NC_000071.6	39644144	39647143	Hs3st1	-	0	5	0	2	7	2	3
NC_000083.6	24750950	24753949	Hs3st6	+	0	4	0	10	13	10	3
NC_000083.6	45572262	45575261	Hsp90ab1	-	0	6	0	9	14	10	3
NC_000077.6	53299480	53302479	Hspa4	-	0	5	0	7	11	7	3
NC_000071.6	149636156	149639155	Hsph1	-	0	4	0	2	6	3	3
NC_000070.6	139074522	139077521	Htr6	-	0	4	0	8	11	8	3
NC_000085.6	36057288	36060287	Htr7	-	0	5	0	5	10	6	3
NC_000070.6	152295214	152298213	Icmt	+	0	7	0	10	17	11	3
NC_000073.6	80114841	80117840	Idh2	-	0	4	0	6	9	6	3
NC_000067.6	155098637	155101636	Ier5	-	0	4	0	3	7	3	3
NC_000068.7	30473200	30476199	Ier5l	-	0	7	0	10	16	10	3
NC_000070.6	94601261	94604260	Ift74	+	0	6	0	3	8	4	3
NC_000075.6	65139121	65142120	Igdcc3	+	0	4	0	9	12	10	3
NC_000077.6	96004945	96007944	Igf2bp1	-	0	8	0	19	26	21	3
NC_000069.6	101375114	101378113	Igsf3	+	0	7	0	6	13	7	3
NC_000074.6	22705592	22708591	Ikbkb	-	0	4	0	1	5	2	3
NC_000079.6	112462070	112465069	Il6st	+	0	8	0	4	12	5	3
NC_000074.6	47674160	47677159	Ing2	-	0	6	0	15	21	16	3
NC_000067.6	75505077	75508076	Inha	+	0	6	0	9	14	10	3
NC_000070.6	59782856	59785855	Inip	-	0	4	0	6	10	7	3
NC_000073.6	139387109	139390108	Inpp5a	+	0	4	0	7	10	7	3
NC_000071.6	28069412	28072411	Insig1	+	0	6	0	5	11	7	3
NC_000068.7	146219997	146222996	Insm1	+	0	7	0	15	20	16	3
NC_000078.6	55596917	55599916	Insm2	+	0	7	0	6	13	7	3
NC_000075.6	108781764	108784763	Ip6k2	+	0	4	0	5	9	5	3
NC_000072.6	90987459	90990458	Iqsec1	-	0	8	0	8	15	10	3
NC_000075.6	54861665	54864664	Ireb2	+	0	4	0	6	10	7	3
NC_000074.6	46737745	46740744	Irf2	+	0	5	0	11	15	12	3
NC_000073.6	19002065	19005064	Irf2bp1	+	0	4	0	7	11	8	3
NC_000078.6	86883815	86886814	Irf2bpl	-	0	7	0	9	16	9	3
NC_000071.6	113770812	113773811	Iscu	+	0	5	0	12	17	12	3
NC_000074.6	85839950	85842949	Itfg1	-	0	4	0	6	10	6	3
NC_000068.7	119740337	119743336	Itpka	+	0	5	0	10	14	11	3
NC_000067.6	180328476	180331475	Itpkb	+	0	5	0	5	10	6	3
NC_000072.6	108211083	108214082	Itpr1	+	0	4	0	9	12	9	3
NC_000078.6	4590467	4593466	Itsn2	+	0	6	0	4	10	5	3
NC_000068.7	137115521	137118520	Jag1	-	0	7	0	12	18	13	3
NC_000070.6	101264292	101267291	Jak1	-	0	4	0	8	12	8	3
NC_000079.6	44727535	44730534	Jarid2	+	0	4	0	5	8	5	3
NC_000079.6	93498809	93501808	Jmy	-	0	6	0	10	16	10	3
NC_000081.6	79686873	79689872	Josd1	-	0	4	0	5	9	6	3
NC_000067.6	17096905	17099904	Jph1	-	0	4	0	6	10	6	3
NC_000082.6	34572292	34575291	Kalrn	-	0	7	5	11	17	13	3
NC_000085.6	25234732	25237731	Kank1	+	0	4	0	6	10	6	3
NC_000067.6	66816597	66819596	Kansl1l	-	0	5	0	8	11	8	3
NC_000068.7	112377211	112380210	Katnbl1	+	0	7	0	3	9	4	3
NC_000072.6	72898980	72901979	Kcmf1	-	0	5	0	12	16	12	3
NC_000068.7	167188989	167191988	Kcnb1	-	0	4	0	8	12	9	3
NC_000073.6	46394457	46397456	Kcnc1	+	0	7	0	10	16	12	3
NC_000073.6	44588661	44591660	Kcnc3	+	0	6	0	8	14	10	3
NC_000072.6	21214109	21217108	Kcnd2	+	0	6	0	8	13	9	3
NC_000069.6	105451956	105454955	Kcnd3os	-	0	6	0	7	13	9	3
NC_000083.6	83630994	83633993	Kcng3	-	0	7	0	12	18	12	3
NC_000067.6	192188376	192191375	Kcnh1	+	0	6	0	4	9	5	3
NC_000071.6	24350682	24353681	Kcnh2	-	0	7	0	5	11	5	3
NC_000072.6	142570648	142573647	Kcnj8	-	0	7	0	2	9	3	3
NC_000080.6	102981638	102984637	Kctd12	-	0	5	0	16	20	16	3
NC_000077.6	115418076	115421075	Kctd2	+	0	4	0	7	11	8	3
NC_000085.6	4397597	4400596	Kdm2a	-	0	5	0	5	10	5	3
NC_000084.6	34775008	34778007	Kdm3b	+	0	6	0	7	13	9	3
NC_000083.6	56324033	56327032	Kdm4b	+	0	5	0	7	12	8	3
NC_000067.6	134558178	134561177	Kdm5b	+	0	7	0	8	13	9	3
NC_000070.6	129741769	129744768	Khdrbs1	-	0	6	0	8	14	9	3
NC_000070.6	149306734	149309733	Kif1b	-	0	4	0	9	13	9	3
NC_000080.6	100283776	100286775	Klf12	-	0	4	0	13	17	14	3
NC_000073.6	63937916	63940915	Klf13	-	0	5	0	13	18	13	3
NC_000072.6	30957991	30960990	Klf14	-	0	4	0	7	11	8	3
NC_000071.6	64801523	64804522	Klf3	+	0	10	0	10	20	13	3
NC_000086.7	94232512	94235511	Klhl15	+	0	5	0	9	13	10	3
NC_000078.6	64964606	64967605	Klhl28	-	0	5	0	8	13	9	3
NC_000071.6	103910273	103913272	Klhl8	-	0	4	0	2	6	3	3
NC_000073.6	30587727	30590726	Kmt2b	-	0	9	0	14	23	15	3
NC_000071.6	25497819	25500818	Kmt2c	-	0	10	4	15	24	17	3
NC_000073.6	118854999	118857998	Knop1	-	0	4	0	6	9	7	3
NC_000082.6	35981363	35984362	Kpna1	+	0	5	0	12	15	13	3
NC_000080.6	61438948	61441947	Kpna3	-	0	5	0	6	10	6	3
NC_000069.6	69126093	69129092	Kpna4	-	0	5	0	12	16	13	3
NC_000072.6	145249292	145252291	Kras	-	0	5	0	6	11	7	3
NC_000075.6	21286970	21289969	Kri1	-	0	4	0	6	9	7	3
NC_000080.6	47647100	47650099	Ktn1	+	0	4	0	8	11	8	3
NC_000068.7	180224913	180227912	Lama5	-	0	5	0	10	15	11	3
NC_000074.6	13157161	13160160	Lamp1	+	0	4	0	5	9	6	3
NC_000069.6	40947720	40950719	Larp1b	+	0	6	0	7	12	8	3
NC_000076.6	7679209	7682208	Lats1	+	0	7	0	3	10	5	3
NC_000067.6	181841402	181844401	Lbr	-	0	4	0	11	15	12	3
NC_000071.6	45856780	45859779	Lcorl	-	0	6	0	6	12	7	3
NC_000084.6	67930535	67933534	Ldlrad4	+	0	7	0	5	12	7	3
NC_000076.6	120978367	120981366	Lemd3	-	0	10	4	9	19	11	3
NC_000074.6	34145740	34148739	Leprotl1	-	0	5	0	8	13	9	3
NC_000068.7	109915647	109918646	Lgr4	+	0	6	0	6	12	7	3
NC_000079.6	94055654	94058653	Lhfpl2	+	0	10	4	7	16	7	3
NC_000071.6	22744022	22747021	Lhfpl3	+	0	4	0	6	9	7	3
NC_000071.6	66743840	66746839	Limch1	+	0	4	0	8	11	9	3
NC_000071.6	100499650	100502649	Lin54	-	0	7	0	4	11	6	3
NC_000067.6	180639150	180642149	Lin9	+	0	10	0	10	20	10	3
NC_000081.6	98917249	98920248	Lmbr1l	-	0	4	0	5	9	5	3
NC_000069.6	144204256	144207255	Lmo4	-	0	7	0	7	14	7	3
NC_000068.7	33639974	33642973	Lmx1b	-	0	5	0	19	22	20	3
NC_000070.6	151860339	151863338	LOC102631977	+	0	9	6	14	23	15	3
NC_000069.6	38885341	38888340	LOC102632538	-	0	4	0	21	25	22	3
NC_000069.6	96458186	96461185	LOC102632901	+	0	4	0	6	9	6	3
NC_000075.6	67758511	67761510	LOC102633151	-	0	4	0	6	10	7	3
NC_000084.6	77064220	77067219	LOC102634716	-	0	4	0	2	6	3	3
NC_000067.6	167283183	167286182	LOC102636733	+	0	4	0	12	15	12	3
NC_000070.6	117493927	117496926	LOC102637578	+	0	5	4	20	25	21	3
NC_000070.6	117287388	117290387	LOC102637763	+	0	5	0	8	13	8	3
NC_000078.6	22466256	22469255	LOC102637839	-	0	4	0	13	16	14	3
NC_000074.6	47410408	47413407	LOC102639847	+	0	6	0	4	10	5	3
NC_000078.6	24830377	24833376	LOC102641621	-	0	5	0	7	11	7	3
NC_000079.6	48869037	48872036	LOC102642832	+	0	13	0	11	24	11	3
NC_000073.6	126500347	126503346	LOC105243053	+	0	4	0	13	16	13	3
NC_000074.6	70486595	70489594	LOC105243207	+	0	6	0	9	14	9	3
NC_000080.6	118234232	118237231	LOC105245869	+	0	12	5	18	30	21	3
NC_000083.6	88064125	88067124	LOC108167341	+	0	11	4	13	24	16	3
NC_000073.6	5036440	5039439	LOC108167404	+	0	5	0	3	7	4	3
NC_000073.6	30278393	30281392	LOC108167416	+	0	4	0	7	11	8	3
NC_000074.6	72546406	72549405	LOC108167536	+	0	6	0	6	12	8	3
NC_000067.6	17095969	17098968	LOC108167615	+	0	5	0	7	12	8	3
NC_000075.6	113929841	113932840	LOC108167687	-	0	13	4	5	18	9	3
NC_000067.6	151343413	151346412	LOC108167733	-	0	7	0	8	15	8	3
NC_000076.6	14543265	14546264	LOC108167795	+	0	8	0	7	15	9	3
NC_000076.6	95513787	95516786	LOC108167829	-	0	9	0	6	15	9	3
NC_000077.6	6291270	6294269	LOC108167883	-	0	6	0	4	10	5	3
NC_000077.6	20739311	20742310	LOC108167886	+	0	7	0	9	16	9	3
NC_000077.6	22510395	22513394	LOC108167889	-	0	4	0	3	6	4	3
NC_000082.6	28563050	28566049	LOC108168282	+	0	5	0	8	12	8	3
NC_000083.6	71000878	71003877	LOC108168340	+	0	5	0	9	13	9	3
NC_000083.6	83213712	83216711	LOC108168353	-	0	8	0	13	20	13	3
NC_000084.6	35117776	35120775	LOC108168373	-	0	7	0	9	16	10	3
NC_000086.7	12078671	12081670	LOC108168482	+	0	6	4	13	17	13	3
NC_000068.7	18689732	18692731	LOC108168727	-	0	6	0	3	9	4	3
NC_000068.7	90578784	90581783	LOC108168775	+	0	6	0	12	18	13	3
NC_000069.6	40948864	40951863	LOC108168867	-	0	6	0	8	13	9	3
NC_000069.6	122244446	122247445	LOC108168894	-	0	8	0	7	14	8	3
NC_000070.6	53439686	53442685	LOC108168953	-	0	4	0	9	13	10	3
NC_000070.6	137356742	137359741	LOC108168959	-	0	9	0	5	14	5	3
NC_000070.6	103212943	103215942	LOC108168969	+	0	5	0	7	11	8	3
NC_000070.6	117881613	117884612	LOC108168974	+	0	5	0	3	8	4	3
NC_000070.6	139831061	139834060	LOC108168982	+	0	7	0	17	23	19	3
NC_000071.6	9160607	9163606	LOC108169023	-	0	6	0	4	9	5	3
NC_000071.6	73254714	73257713	LOC108169049	+	0	7	0	15	22	16	3
NC_000072.6	124857144	124860143	LOC108169168	+	0	4	0	7	11	8	3
NC_000072.6	38874111	38877110	LOC108169201	+	0	11	0	7	18	9	3
NC_000080.6	39470429	39473428	LOC432842	+	0	6	0	10	16	12	3
NC_000074.6	86622043	86625042	Lonp2	+	0	6	0	5	10	6	3
NC_000074.6	36248517	36251516	Lonrf1	-	0	7	0	7	14	9	3
NC_000067.6	38835716	38838715	Lonrf2	-	0	5	0	8	13	8	3
NC_000085.6	12794197	12797196	Lpxn	+	0	6	0	8	14	10	3
NC_000080.6	54462147	54465146	Lrp10	+	0	6	0	6	12	8	3
NC_000076.6	7587762	7590761	Lrp11	+	0	6	0	6	11	6	3
NC_000068.7	69585068	69588067	Lrp2	-	0	4	0	8	12	9	3
NC_000068.7	91455471	91458470	Lrp4	+	0	4	0	9	13	9	3
NW_004058050.1	133094	136093	Lrrc38	+	0	5	0	7	11	8	3
NC_000070.6	116073269	116076268	Lrrc41	+	0	8	0	10	18	11	3
NC_000077.6	62647583	62650582	Lrrc75a	-	0	7	4	7	13	8	3
NC_000071.6	105697969	105700968	Lrrc8d	+	0	6	0	12	15	12	3
NC_000074.6	25783536	25786535	Lsm1	+	0	8	0	5	12	6	3
NC_000074.6	78820153	78823152	Lsm6	-	0	5	0	2	7	2	3
NC_000073.6	30972470	30975469	Lsr	-	0	4	0	9	12	9	3
NC_000076.6	13192138	13195137	Ltv1	-	0	4	0	5	8	5	3
NC_000070.6	3676121	3679120	Lyn	+	0	4	0	4	7	4	3
NC_000068.7	140393356	140396355	Macrod2	+	0	4	0	5	8	5	3
NC_000071.6	33333572	33336571	Maea	+	0	4	0	11	15	12	3
NC_000081.6	75746923	75749922	Mafa	-	0	4	0	12	16	13	3
NC_000068.7	160366066	160369065	Mafb	-	0	5	0	12	16	13	3
NC_000077.6	120632548	120635547	Mafg	-	0	8	0	6	13	6	3
NC_000084.6	65428969	65431968	Malt1	+	0	4	0	11	15	11	3
NC_000086.7	71048040	71051039	Mamld1	+	0	4	0	3	7	3	3
NC_000076.6	54075548	54078547	Man1a	-	0	4	0	4	8	5	3
NC_000069.6	100684474	100687473	Man1a2	-	0	8	0	8	14	8	3
NC_000083.6	64599649	64602648	Man2a1	+	0	11	0	9	20	12	3
NC_000073.6	80370487	80373486	Man2a2	-	0	5	0	8	13	8	3
NC_000074.6	125667818	125670817	Map10	+	0	5	0	7	12	7	3
NC_000077.6	65787360	65790359	Map2k4	-	0	4	0	6	9	7	3
NC_000086.7	159986433	159989432	Map3k15	+	0	5	0	3	8	3	3
NC_000084.6	32161089	32164088	Map3k2	+	0	5	0	3	8	4	3
NC_000083.6	80727206	80730205	Map4k3	-	0	7	0	5	12	7	3
NC_000067.6	39898912	39901911	Map4k4	+	0	7	0	7	14	9	3
NC_000078.6	69892171	69895170	Map4k5	-	0	7	0	9	16	11	3
NC_000086.7	159412524	159415523	Map7d2	+	0	4	0	3	7	3	3
NC_000075.6	75409020	75412019	Mapk6	-	0	4	0	10	14	10	3
NC_000067.6	131096844	131099843	Mapkapk2	-	0	5	0	8	13	9	3
NC_000068.7	153739287	153742286	Mapre1	+	0	5	0	4	9	4	3
NC_000070.6	129511581	129514580	Marcksl1	+	0	5	0	8	13	9	3
NC_000067.6	184998572	185001571	Mark1	-	0	6	0	5	11	7	3
NC_000085.6	7340868	7343867	Mark2	-	0	6	0	4	10	6	3
NC_000073.6	19457798	19460797	Mark4	-	0	6	0	6	12	7	3
NC_000079.6	100615972	100618971	Marveld2	-	0	4	0	4	7	5	3
NC_000070.6	116463255	116466254	Mast2	-	0	5	0	4	9	5	3
NC_000068.7	23155025	23158024	Mastl	-	0	6	0	4	10	6	3
NC_000073.6	127025554	127028553	Maz	-	0	4	0	11	14	12	3
NC_000082.6	28928699	28931698	Mb21d2	-	0	6	0	10	16	11	3
NC_000078.6	24829549	24832548	Mboat2	+	0	5	0	7	11	7	3
NC_000069.6	95656410	95659409	Mcl1	+	0	5	0	7	12	8	3
NC_000070.6	32655112	32658111	Mdn1	+	0	4	0	5	9	6	3
NC_000075.6	86694915	86697914	Me1	-	0	4	0	6	10	7	3
NC_000069.6	59003594	59006593	Med12l	+	0	4	0	10	14	11	3
NC_000077.6	86356526	86359525	Med13	-	0	7	0	8	14	10	3
NC_000074.6	72547311	72550310	Med26	-	0	6	0	5	11	7	3
NC_000083.6	74294530	74297529	Memo1	-	0	5	0	7	11	8	3
NC_000076.6	127039643	127042642	Mettl1	+	0	5	0	10	15	11	3
NC_000076.6	127041027	127044026	Mettl21b	-	0	5	0	11	16	12	3
NC_000080.6	31494037	31497036	Mettl6	-	0	4	0	8	12	9	3
NC_000073.6	82865333	82868332	Mex3b	+	0	8	4	13	21	15	3
NC_000084.6	73570592	73573591	Mex3c	+	0	8	0	12	19	13	3
NC_000074.6	60630825	60633824	Mfap3l	+	0	5	0	8	12	9	3
NC_000067.6	82722890	82725889	Mff	+	0	4	0	2	6	3	3
NC_000074.6	35585798	35588797	Mfhas1	+	0	5	0	11	16	11	3
NC_000081.6	102277456	102280455	Mfsd5	+	0	4	0	7	10	8	3
NC_000067.6	52726463	52729462	Mfsd6	-	0	8	0	5	13	7	3
NC_000067.6	191025214	191028213	Mfsd7b	-	0	4	0	9	11	9	3
NC_000085.6	45782554	45785553	Mgea5	-	0	8	0	9	17	10	3
NC_000067.6	183368566	183371565	Mia3	-	0	7	0	6	13	8	3
NC_000081.6	80231933	80234932	Mief1	+	0	6	0	4	10	6	3
NC_000079.6	111684157	111687156	Mier3	+	0	8	0	8	15	10	3
NC_000076.6	75859251	75862250	Mif	-	0	4	0	7	10	8	3
NC_000070.6	139130114	139133113	Minos1	-	0	4	0	5	8	5	3
NC_000074.6	84010634	84013633	Mir1199	-	0	4	0	13	16	14	3
NC_000080.6	115041671	115044670	Mir17	+	0	4	0	6	10	7	3
NC_000084.6	6489647	6492646	Mir1893	-	0	5	0	11	14	11	3
NC_000077.6	79709969	79712968	Mir193a	+	0	4	0	16	18	16	3
NC_000082.6	11253446	11256445	Mir1945	-	0	6	0	10	15	11	3
NC_000078.6	112128880	112131879	Mir203	+	0	6	0	5	11	6	3
NC_000083.6	34024093	34027092	Mir219a-1	-	0	4	0	8	12	9	3
NC_000083.6	34023012	34026011	Mir219c	+	0	5	0	9	14	10	3
NC_000082.6	44557130	44560129	Mir3081	-	0	4	0	6	10	7	3
NC_000078.6	108834973	108837972	Mir345	+	0	4	0	8	11	9	3
NC_000073.6	30587380	30590379	Mir3569	+	0	9	0	14	23	15	3
NC_000075.6	108566777	108569776	Mir425	+	0	4	0	10	14	11	3
NC_000080.6	102981633	102984632	Mir5130	-	0	5	0	16	20	16	3
NC_000073.6	7296891	7299890	Mir5620	+	0	6	0	8	13	9	3
NC_000068.7	131039399	131042398	Mir6973b	-	0	5	0	5	10	6	3
NC_000083.6	46552890	46555889	Mir6976	-	0	7	0	11	15	11	3
NC_000069.6	122292704	122295703	Mir760	-	0	7	0	7	14	8	3
NC_000073.6	127706487	127709486	Mir762	+	0	6	0	7	13	7	3
NC_000080.6	26668609	26671608	Mir7672	-	0	5	0	8	13	9	3
NC_000074.6	85698905	85701904	Mir8109	+	0	4	0	9	11	9	3
NC_000072.6	30173126	30176125	Mirc35hg	-	0	5	5	22	27	23	3
NC_000082.6	13254020	13257019	Mkl2	+	0	6	0	7	13	9	3
NC_000083.6	56934485	56937484	Mllt1	-	0	5	0	9	14	9	3
NC_000077.6	90247297	90250296	Mmd	+	0	5	0	7	10	8	3
NC_000077.6	62646632	62649631	Mmgt2	+	0	7	0	7	13	7	3
NC_000085.6	41980166	41983165	Mms19	-	0	8	0	14	22	14	3
NC_000071.6	111416166	111419165	Mn1	+	0	4	0	22	25	22	3
NC_000078.6	73110181	73113180	Mnat1	+	0	7	0	18	25	20	3
NC_000077.6	74828781	74831780	Mnt	+	0	4	0	13	17	14	3
NC_000078.6	102742662	102745661	Moap1	-	0	4	0	6	10	7	3
NC_000068.7	168228622	168231621	Mocs3	+	0	6	5	19	23	19	3
NC_000078.6	110839963	110842962	Mok	-	0	4	0	4	8	4	3
NC_000076.6	123075506	123078505	Mon2	-	0	4	0	5	8	6	3
NC_000081.6	83777472	83780471	Mpped1	+	0	6	4	8	14	10	3
NC_000077.6	59660473	59663472	Mprip	+	0	4	0	6	10	6	3
NC_000082.6	13901161	13904160	Mpv17l	+	0	4	0	8	12	8	3
NC_000075.6	99435965	99438964	Mras	-	0	5	0	5	10	6	3
NC_000074.6	71462926	71465925	Mrpl34	+	0	5	0	10	15	10	3
NC_000073.6	100606997	100609996	Mrpl48	-	0	5	0	9	14	10	3
NC_000080.6	54424909	54427908	Mrpl52	+	0	4	0	5	9	5	3
NC_000070.6	139351577	139354576	Mrto4	-	0	4	0	3	7	4	3
NC_000075.6	101072020	101075019	Msl2	+	0	5	0	10	15	11	3
NT_166322.1	68590	71589	Mta1	-	0	4	0	5	9	5	3
NC_000083.6	66448807	66451806	Mtcl1	-	0	8	0	9	17	9	3
NC_000070.6	134534388	134537387	Mtfr1l	-	0	9	0	10	18	10	3
NC_000071.6	90929196	90932195	Mthfd2l	+	0	4	0	5	8	6	3
NC_000073.6	64285670	64288669	Mtmr10	+	0	4	0	5	8	6	3
NC_000081.6	59081160	59084159	Mtss1	-	0	6	0	11	16	12	3
NC_000074.6	110719283	110722282	Mtss1l	+	0	6	0	5	11	6	3
NC_000071.6	147955320	147958319	Mtus2	+	0	5	0	7	12	8	3
NC_000076.6	21159985	21162984	Myb	-	0	4	0	7	11	8	3
NC_000070.6	123903013	123906012	Mycbp	+	0	4	0	5	9	5	3
NC_000078.6	12940837	12943836	Mycn	-	0	4	0	5	9	5	3
NC_000077.6	68689915	68692914	Myh10	+	0	4	0	7	11	8	3
NC_000083.6	71001534	71004533	Myl12a	-	0	5	0	9	13	9	3
NC_000069.6	30600087	30603086	Mynn	+	0	5	0	10	14	11	3
NC_000075.6	80162976	80165975	Myo6	+	0	5	0	6	10	6	3
NC_000080.6	79479668	79482667	n-TEttc4	+	0	5	0	14	19	15	3
NC_000077.6	69117865	69120864	n-TGgcc5	-	0	7	0	12	16	12	3
NC_000073.6	28370999	28373998	n-TIaat16	+	0	6	0	13	19	14	3
NC_000076.6	12921654	12924653	n-TLtaa3	-	0	4	0	3	7	4	3
NC_000069.6	96458212	96461211	n-TNgtt13	-	0	4	0	6	9	6	3
NC_000069.6	122292033	122295032	n-TRtct2	-	0	7	0	8	15	9	3
NC_000070.6	10872064	10875063	n-TSaga9	+	0	5	0	4	9	5	3
NC_000076.6	128457546	128460545	n-TScga2	-	0	5	0	8	11	8	3
NC_000071.6	150593526	150596525	N4bp2l1	-	0	4	0	11	14	12	3
NC_000077.6	51650074	51653073	N4bp3	-	0	5	0	7	12	8	3
NC_000079.6	59583323	59586322	Naa35	+	0	7	0	7	14	9	3
NC_000067.6	52499449	52502448	Nab1	-	0	5	0	6	11	7	3
NC_000078.6	32818335	32821334	Nampt	+	0	6	0	8	14	9	3
NC_000085.6	60753987	60756986	Nanos1	+	0	4	0	10	14	11	3
NC_000069.6	56183267	56186266	Nbea	-	0	5	0	5	10	6	3
NC_000070.6	15955586	15958585	Nbn	+	0	4	0	6	10	7	3
NC_000082.6	31946546	31949545	Ncbp2	+	0	4	0	7	11	8	3
NC_000077.6	73045867	73048866	Ncbp3	+	0	5	0	3	8	4	3
NC_000070.6	126752638	126755637	Ncdn	-	0	6	0	7	13	9	3
NC_000068.7	80580300	80583299	Nckap1	-	0	4	0	9	13	10	3
NC_000080.6	32157887	32160886	Ncoa4	+	0	4	0	1	5	2	3
NC_000068.7	155472895	155475894	Ncoa6	-	0	4	0	8	12	9	3
NC_000077.6	68852132	68855131	Ndel1	-	0	4	0	6	10	7	3
NC_000084.6	38416912	38419911	Ndfip1	+	0	4	0	5	9	6	3
NC_000084.6	60747661	60750660	Ndst1	-	0	11	4	7	18	8	3
NC_000067.6	92472759	92475758	Ndufa10	-	0	4	0	3	7	4	3
NC_000079.6	108157656	108160655	Ndufaf2	-	0	5	0	7	12	8	3
NC_000086.7	20616565	20619564	Ndufb11	-	0	4	0	5	7	5	3
NC_000084.6	64885683	64888682	Nedd4l	+	0	6	0	12	16	12	3
NC_000074.6	85699920	85702919	Neto2	-	0	5	0	9	12	9	3
NC_000083.6	26412965	26415964	Neurl1b	+	0	9	0	7	15	9	3
NC_000077.6	4848545	4851544	Nf2	-	0	4	0	10	14	11	3
NC_000084.6	80712072	80715071	Nfatc1	-	0	6	4	11	16	12	3
NC_000076.6	81430134	81433133	Nfic	-	0	5	4	14	19	15	3
NC_000074.6	84799339	84802338	Nfix	-	0	10	0	4	14	7	3
NC_000069.6	135690983	135693982	Nfkb1	-	0	5	0	6	10	7	3
NC_000083.6	48408902	48411901	Nfya	-	0	6	0	6	12	6	3
NC_000070.6	130573037	130576036	Nkain1	-	0	4	0	5	8	5	3
NC_000071.6	33433091	33436090	Nkx1-1	-	0	4	0	10	14	10	3
NC_000071.6	101663712	101666711	Nkx6-1	-	0	6	0	14	18	14	3
NC_000079.6	104108661	104111660	Nln	-	0	4	0	7	10	7	3
NC_000085.6	18630016	18633015	Nmrk1	+	0	5	0	5	10	6	3
NC_000077.6	89301560	89304559	Nog	-	0	9	0	8	17	9	3
NC_000068.7	153528972	153531971	Nol4l	-	0	8	4	15	23	17	3
NC_000079.6	43396376	43399375	Nol7	+	0	4	0	6	10	7	3
NC_000083.6	24694234	24697233	Noxo1	+	0	9	0	4	13	5	3
NC_000068.7	25401050	25404049	Npdc1	+	0	5	0	3	8	3	3
NC_000085.6	45748564	45751563	Npm3	-	0	4	0	8	12	9	3
NC_000075.6	58580240	58583239	Nptn	+	0	6	0	3	9	4	3
NC_000073.6	44552969	44555968	Nr1h2	-	0	4	0	3	7	3	3
NC_000074.6	71380953	71383952	Nr2f6	-	0	8	0	11	19	11	3
NC_000071.6	31238883	31241882	Nrbp1	+	0	5	0	11	15	11	3
NC_000072.6	30045988	30048987	Nrf1	+	0	10	5	7	14	9	3
NC_000079.6	55207782	55210781	Nsd1	+	0	5	0	11	13	11	3
NC_000070.6	123199204	123202203	Nt5c1a	+	0	4	0	6	9	7	3
NC_000071.6	24683815	24686814	Nub1	+	0	4	0	4	8	5	3
NC_000078.6	83920935	83923934	Numb	-	0	5	0	10	14	10	3
NC_000073.6	102209188	102212187	Nup98	-	0	4	0	6	10	6	3
NC_000083.6	48407985	48410984	Oard1	+	0	6	0	6	12	6	3
NC_000067.6	75505659	75508658	Obsl1	-	0	6	0	7	13	8	3
NC_000077.6	6289597	6292596	Ogdh	+	0	6	0	4	10	5	3
NC_000068.7	180587375	180590374	Ogfr	+	0	4	0	4	8	5	3
NC_000068.7	73213448	73216447	Ola1	-	0	5	0	6	9	6	3
NC_000067.6	58504110	58507109	Orc2	-	0	5	0	7	12	8	3
NC_000068.7	76404508	76407507	Osbpl6	+	0	5	0	12	17	13	3
NC_000085.6	18630814	18633813	Ostf1	-	0	5	0	5	10	6	3
NC_000079.6	94873627	94876626	Otp	+	0	4	0	2	6	3	3
NC_000068.7	19656062	19659061	Otud1	+	0	7	0	9	16	11	3
NC_000074.6	79637676	79640675	Otud4	+	0	7	0	10	16	11	3
NC_000075.6	119321713	119324712	Oxsr1	-	0	5	0	10	15	11	3
NC_000072.6	124856688	124859687	P3h3	-	0	4	0	8	12	9	3
NC_000081.6	36608582	36611581	Pabpc1	-	0	6	0	8	14	9	3
NC_000080.6	54892143	54895142	Pabpn1	+	0	4	0	5	9	6	3
NC_000077.6	74723385	74726384	Pafah1b1	-	0	5	0	8	13	9	3
NC_000079.6	40999010	41002009	Pak1ip1	+	0	5	0	6	11	6	3
NC_000067.6	98094659	98097658	Pam	-	0	5	0	6	11	7	3
NC_000071.6	147428006	147431005	Pan3	+	0	4	0	9	13	9	3
NC_000079.6	93191310	93194309	Papd4	-	0	4	0	4	8	4	3
NC_000078.6	105782674	105785673	Papola	+	0	5	0	5	10	6	3
NC_000068.7	168079004	168082003	Pard6b	+	0	4	0	6	10	7	3
NC_000075.6	65212379	65215378	Parp16	+	0	4	0	5	8	5	3
NC_000085.6	11910399	11913398	Patl1	+	0	4	0	6	9	6	3
NC_000076.6	108330189	108333188	Pawr	+	0	7	4	9	16	11	3
NC_000071.6	27790814	27793813	Paxip1	-	0	7	0	5	12	7	3
NC_000072.6	86525172	86528171	Pcbp1	-	0	7	4	16	23	18	3
NC_000075.6	106451383	106454382	Pcbp4	+	0	4	0	9	12	9	3
NC_000074.6	13104344	13107343	Pcid2	-	0	9	0	12	20	13	3
NC_000076.6	7680145	7683144	Pcmt1	-	0	7	0	3	10	5	3
NC_000085.6	17836633	17839632	Pcsk5	-	0	12	4	7	18	10	3
NC_000073.6	65860136	65863135	Pcsk6	+	0	8	0	7	13	7	3
NC_000080.6	26668847	26671846	Pde12	-	0	4	0	8	12	9	3
NC_000075.6	21163678	21166677	Pde4a	+	0	6	0	5	11	7	3
NC_000082.6	35489901	35492900	Pdia5	-	0	4	0	8	11	9	3
NC_000069.6	142394697	142397696	Pdlim5	-	0	5	0	6	11	7	3
NC_000082.6	13902146	13905145	Pdxdc1	-	0	4	0	7	11	7	3
NC_000086.7	73824034	73827033	Pdzd4	-	0	4	0	5	8	6	3
NC_000073.6	62463511	62466510	Peg12	-	0	8	0	8	16	9	3
NC_000080.6	48118777	48121776	Peli2	+	0	6	0	6	11	6	3
NC_000070.6	151043724	151046723	Per3	-	0	5	0	5	10	6	3
NC_000069.6	33142275	33145274	Pex5l	-	0	4	0	9	12	10	3
NC_000076.6	78008797	78011796	Pfkl	-	0	4	0	5	9	6	3
NC_000073.6	102208213	102211212	Pgap2	+	0	4	0	6	10	6	3
NC_000074.6	124433463	124436462	Pgbd5	-	0	5	0	10	13	11	3
NC_000072.6	122339228	122342227	Phc1	-	0	4	0	5	9	5	3
NC_000069.6	30968480	30971479	Phc3	-	0	4	0	4	8	5	3
NC_000077.6	77980754	77983753	Phf12	+	0	12	0	9	20	11	3
NC_000070.6	151995180	151998179	Phf13	-	0	9	4	13	20	14	3
NC_000079.6	48869886	48872885	Phf2	-	0	13	0	10	23	10	3
NC_000081.6	66575519	66578518	Phf20l1	+	0	5	0	4	9	4	3
NC_000075.6	82974702	82977701	Phip	-	0	4	0	6	10	6	3
NC_000074.6	85838939	85841938	Phkb	+	0	4	0	6	10	6	3
NC_000074.6	109866520	109869519	Phlpp2	+	0	7	0	7	14	7	3
NC_000077.6	95822500	95825499	Phospho1	+	0	5	0	10	14	10	3
NC_000084.6	77063208	77066207	Pias2	+	0	4	0	2	6	3	3
NC_000069.6	96694375	96697374	Pias3	+	0	6	0	5	11	7	3
NC_000080.6	99097424	99100423	Pibf1	+	0	4	0	9	13	10	3
NC_000073.6	90128220	90131219	Picalm	+	0	5	0	8	12	8	3
NC_000077.6	62456460	62459459	Pigl	+	0	5	0	11	16	11	3
NC_000086.7	140060879	140063878	Pih1h3b	+	0	9	0	8	16	8	3
NC_000067.6	133043672	133046671	Pik3c2b	+	0	5	0	9	14	10	3
NC_000079.6	101767218	101770217	Pik3r1	-	0	9	4	13	22	16	3
NC_000077.6	68430125	68433124	Pik3r5	+	0	4	0	6	10	7	3
NC_000068.7	18997401	19000400	Pip4k2a	-	0	4	0	8	12	9	3
NC_000071.6	111328697	111331696	Pitpnb	+	0	4	0	6	10	6	3
NC_000071.6	124248761	124251760	Pitpnm2	-	0	8	0	7	13	9	3
NC_000083.6	83213283	83216282	Pkdcc	+	0	8	0	13	20	13	3
NC_000083.6	31562721	31565720	Pknox1	+	0	4	0	7	11	7	3
NC_000070.6	94602248	94605247	Plaa	-	0	6	0	3	8	4	3
NC_000080.6	25901894	25904893	Plac9a	-	0	4	0	5	9	6	3
NC_000085.6	6973322	6976321	Plcb3	-	0	5	0	9	12	10	3
NC_000075.6	119092593	119095592	Plcd1	-	0	4	0	8	10	8	3
NC_000068.7	160729310	160732309	Plcg1	+	0	4	0	8	12	9	3
NC_000072.6	140421639	140424638	Plekha5	+	0	5	0	7	12	8	3
NC_000067.6	133161768	133164767	Plekha6	+	0	4	0	10	14	11	3
NC_000072.6	54593111	54596110	Plekha8	+	0	4	0	4	8	5	3
NC_000073.6	28371689	28374688	Plekhg2	-	0	6	0	12	18	14	3
NC_000070.6	141663116	141666115	Plekhm2	-	0	7	0	6	12	7	3
NC_000075.6	92540223	92543222	Plod2	+	0	6	0	9	15	11	3
NC_000068.7	16354210	16357209	Plxdc2	+	0	4	0	9	13	9	3
NC_000072.6	89361614	89364613	Plxna1	-	0	8	0	10	18	11	3
NC_000067.6	194617829	194620828	Plxna2	+	0	7	0	9	14	10	3
NC_000076.6	94944276	94947275	Plxnc1	-	0	6	0	8	14	9	3
NC_000071.6	143907901	143910900	Pms2	+	0	4	0	4	7	4	3
NC_000078.6	59064919	59067918	Pnn	+	0	4	0	4	8	5	3
NC_000067.6	166408851	166411850	Pogk	-	0	5	0	6	11	7	3
NC_000074.6	22652467	22655466	Polb	-	0	5	0	3	8	3	3
NC_000079.6	96541647	96544646	Polk	-	0	4	0	10	14	11	3
NC_000073.6	141474154	141477153	Polr2l	-	0	6	0	9	14	9	3
NC_000071.6	147858628	147861627	Pomp	+	0	4	0	5	7	5	3
NC_000071.6	115233589	115236588	Pop5	+	0	5	0	9	12	9	3
NC_000067.6	166001673	166004672	Pou2f1	-	0	8	0	11	19	12	3
NC_000073.6	25178994	25181993	Pou2f2	-	0	4	0	5	9	5	3
NC_000081.6	100599313	100602312	Pou6f1	-	0	8	0	5	13	7	3
NC_000072.6	115358877	115361876	Pparg	+	0	5	0	6	11	7	3
NC_000073.6	144552730	144555729	Ppfia1	-	0	4	0	5	9	5	3
NC_000068.7	69720819	69723818	Ppig	+	0	4	0	7	11	7	3
NC_000085.6	6973048	6976047	Ppp1r14b	+	0	5	0	8	11	9	3
NC_000076.6	3364071	3367070	Ppp1r14c	+	0	4	0	6	10	7	3
NC_000077.6	17157298	17160297	Ppp3r1	+	0	8	0	9	17	11	3
NC_000083.6	65780378	65783377	Ppp4r1	+	0	8	0	5	12	6	3
NC_000071.6	122282398	122285397	Pptc7	+	0	5	0	6	11	6	3
NC_000070.6	139309714	139312713	Pqlc2	-	0	5	0	9	14	10	3
NC_000078.6	16999418	17002417	Pqlc3	-	0	5	0	6	10	7	3
NC_000076.6	85916153	85919152	Prdm4	-	0	7	0	3	10	5	3
NC_000072.6	65776753	65779752	Prdm5	+	0	4	0	4	8	5	3
NC_000084.6	53461583	53464582	Prdm6	+	0	5	0	11	15	12	3
NC_000069.6	146811947	146814946	Prkacb	-	0	4	0	5	9	6	3
NC_000083.6	79019817	79022816	Prkd3	-	0	4	0	6	9	6	3
NC_000073.6	49776354	49779353	Prmt3	+	0	4	0	3	7	4	3
NC_000069.6	110250000	110252999	Prmt6	-	0	5	0	7	10	8	3
NC_000072.6	127768488	127771487	Prmt8	-	0	4	0	10	14	10	3
NC_000084.6	57352733	57355732	Prrc1	+	0	4	0	3	7	3	3
NT_187027.1	1482060	1485059	Prrc2a	-	0	4	0	4	8	4	3
NC_000068.7	30843064	30846063	Prrx2	+	0	4	0	3	6	4	3
NC_000075.6	72805274	72808273	Prtg	+	0	5	0	7	12	8	3
NC_000068.7	180041465	180044464	Psma7	-	0	4	0	12	15	12	3
NC_000069.6	94885959	94888958	Psmb4	-	0	4	0	4	8	4	3
NC_000077.6	101314251	101317250	Psme3	+	0	4	0	8	11	8	3
NC_000085.6	23684898	23687897	Ptar1	+	0	5	0	5	9	5	3
NC_000069.6	119782800	119785799	Ptbp2	-	0	4	0	6	10	7	3
NC_000079.6	63572617	63575616	Ptch1	-	0	6	0	6	12	7	3
NC_000085.6	32755577	32758576	Pten	+	0	7	0	18	25	20	3
NT_166305.2	3764440	3767439	Pthlh	-	0	4	0	6	10	7	3
NC_000081.6	73422276	73425275	Ptk2	-	0	5	0	6	10	7	3
NC_000067.6	86524736	86527735	Ptma	+	0	5	0	19	23	19	3
NC_000072.6	124916947	124919946	Ptms	-	0	7	0	8	15	9	3
NC_000070.6	129818204	129821203	Ptp4a2	+	0	6	0	8	13	9	3
NC_000067.6	189726215	189729214	Ptpn14	+	0	8	0	11	19	12	3
NC_000084.6	67723759	67726758	Ptpn2	-	0	5	0	7	12	7	3
NC_000068.7	90579680	90582679	Ptprj	-	0	6	0	10	16	12	3
NC_000070.6	155890852	155893851	Pusl1	-	0	4	0	10	14	11	3
NC_000073.6	139246482	139249481	Pwwp2b	+	0	7	0	11	17	12	3
NC_000071.6	115504676	115507675	Pxn	+	0	4	0	6	9	6	3
NC_000083.6	10318362	10321361	Qk	-	0	6	0	8	12	9	3
NC_000068.7	104815842	104818841	Qser1	-	0	4	0	7	11	7	3
NC_000076.6	127378332	127381331	R3hdm2	+	0	6	0	7	13	8	3
NC_000068.7	35200121	35203120	Rab14	-	0	6	0	7	13	8	3
NC_000077.6	78186427	78189426	Rab34	+	0	5	0	10	14	10	3
NC_000073.6	100605586	100608585	Rab6a	+	0	5	0	9	14	10	3
NC_000072.6	88044271	88047270	Rab7	-	0	4	0	5	9	5	3
NC_000067.6	160792477	160795476	Rabgap1l	-	0	5	0	5	10	6	3
NC_000079.6	100650062	100653061	Rad17	-	0	4	0	10	14	10	3
NC_000068.7	172998112	173001111	Rae1	+	0	4	0	5	9	6	3
NC_000077.6	60103013	60106012	Rai1	+	0	4	0	9	12	10	3
NC_000071.6	129018156	129021155	Ran	+	0	4	0	10	14	11	3
NC_000077.6	33513140	33516139	Ranbp17	-	0	5	0	4	9	4	3
NC_000070.6	137662710	137665709	Rap1gap	+	0	4	0	4	8	5	3
NC_000069.6	139074229	139077228	Rap1gds1	-	0	5	4	10	13	11	3
NC_000069.6	61362507	61365506	Rap2b	+	0	6	0	7	12	8	3
NC_000069.6	79286242	79289241	Rapgef2	-	0	8	0	9	16	10	3
NC_000079.6	85288494	85291493	Rasa1	-	0	6	0	7	13	9	3
NC_000075.6	96630626	96633625	Rasa2	-	0	6	0	8	13	8	3
NC_000085.6	6397008	6400007	Rasgrp2	+	0	4	0	11	13	11	3
NC_000077.6	83407142	83410141	Rasl10b	+	0	4	0	4	8	5	3
NC_000067.6	6212662	6215661	Rb1cc1	+	0	5	0	9	12	9	3
NC_000070.6	129334373	129337372	Rbbp4	-	0	6	0	10	15	10	3
NC_000073.6	122968564	122971563	Rbbp6	+	0	8	0	8	16	10	3
NC_000071.6	31696699	31699698	Rbks	-	0	8	0	4	12	5	3
NC_000086.7	20615503	20618502	Rbm10	+	0	4	0	5	7	5	3
NC_000068.7	11602200	11605199	Rbm17	-	0	6	0	4	10	6	3
NC_000084.6	60558786	60561785	Rbm22	+	0	4	0	2	6	3	3
NC_000079.6	46416176	46419175	Rbm24	+	0	4	0	8	11	9	3
NC_000070.6	140699473	140702472	Rcc2	+	0	5	0	10	14	11	3
NC_000067.6	192137068	192140067	Rcor3	-	0	11	0	9	19	12	3
NC_000067.6	16103882	16106881	Rdh10	+	0	7	0	16	21	17	3
NC_000078.6	10388694	10391693	Rdh14	+	0	4	0	3	7	4	3
NC_000072.6	142386117	142389116	Recql	-	0	4	0	7	11	8	3
NC_000084.6	34372416	34375415	Reep5	-	0	4	0	8	12	8	3
NC_000071.6	77263494	77266493	Rest	+	0	4	0	13	17	13	3
NC_000067.6	38128921	38131920	Rev1	-	0	6	0	10	16	11	3
NC_000077.6	120783218	120786217	Rfng	-	0	7	0	10	17	10	3
NC_000067.6	159229537	159232536	Rfwd2	+	0	6	0	4	10	5	3
NC_000083.6	33927527	33930526	Rgl2	+	0	4	0	6	8	6	3
NC_000067.6	175491814	175494813	Rgs7	-	0	6	0	7	12	8	3
NC_000072.6	128361912	128364911	Rhno1	-	0	10	0	8	18	10	3
NC_000075.6	108304160	108307159	Rhoa	+	0	4	0	9	13	10	3
NC_000079.6	75942825	75945824	Rhobtb3	-	0	7	0	4	11	6	3
NC_000073.6	102249119	102252118	Rhog	-	0	4	0	6	10	7	3
NC_000074.6	123651929	123654928	Rhou	+	0	4	0	5	9	6	3
NC_000085.6	29520282	29523281	Ric1	+	0	8	0	13	20	13	3
NC_000081.6	6706349	6709348	Rictor	+	0	7	0	12	19	14	3
NC_000067.6	22804725	22807724	Rims1	-	0	5	0	4	8	5	3
NC_000081.6	39196286	39199285	Rims2	+	0	8	4	16	24	16	3
NC_000083.6	34023681	34026680	Ring1	-	0	4	0	10	14	10	3
NC_000079.6	34000363	34003362	Ripk1	+	0	4	0	5	9	5	3
NC_000070.6	16162677	16165676	Ripk2	-	0	10	5	8	18	11	3
NC_000079.6	58400248	58403247	Rmi1	+	0	6	0	13	19	13	3
NC_000070.6	109475506	109478505	Rnf11	-	0	4	0	7	11	8	3
NC_000075.6	70502726	70505725	Rnf111	-	0	5	0	6	11	7	3
NC_000077.6	44516793	44519792	Rnf145	+	0	6	0	8	14	10	3
NC_000076.6	29361443	29364442	Rnf146	-	0	4	0	6	9	6	3
NC_000077.6	116412033	116415032	Rnf157	-	0	4	0	7	10	7	3
NC_000079.6	105293819	105296818	Rnf180	-	0	4	0	4	8	5	3
NC_000081.6	36282148	36285147	Rnf19a	-	0	4	0	7	11	8	3
NC_000071.6	143112103	143115102	Rnf216	-	0	4	0	5	9	5	3
NC_000079.6	54692995	54695994	Rnf44	-	0	4	0	20	24	20	3
NC_000083.6	24412642	24415641	Rnps1	+	0	6	0	8	14	9	3
NC_000084.6	10180793	10183792	Rock1	-	0	4	0	7	11	8	3
NC_000085.6	8928357	8931356	Rom1	-	0	5	0	8	13	9	3
NC_000070.6	100093791	100096790	Ror1	+	0	5	0	5	9	5	3
NC_000072.6	70791176	70794175	Rpia	-	0	5	0	6	11	7	3
NC_000077.6	98021080	98024079	Rpl19	+	0	4	0	7	11	7	3
NC_000077.6	101440245	101443244	Rpl27	+	0	4	0	10	14	11	3
NC_000073.6	109517195	109520194	Rpl27a	+	0	4	0	3	7	3	3
NC_000081.6	5114613	5117612	Rpl37	+	0	4	0	8	12	8	3
NC_000071.6	107898528	107901527	Rpl5	+	0	4	0	10	13	10	3
NC_000067.6	16103434	16106433	Rpl7	-	0	7	0	17	22	17	3
NC_000083.6	33954642	33957641	Rps18	-	0	4	0	7	11	7	3
NC_000077.6	86543808	86546807	Rps6kb1	-	0	6	0	8	14	10	3
NC_000070.6	32980998	32983997	Rragd	+	0	5	0	10	15	10	3
NC_000073.6	114116782	114119781	Rras2	-	0	6	0	6	12	8	3
NT_187007.1	383195	386194	Rtn4r	+	0	4	0	6	9	7	3
NC_000077.6	75191993	75194992	Rtn4rl1	+	0	5	0	16	19	17	3
NC_000071.6	88562792	88565791	Rufy3	+	0	6	0	8	13	9	3
NC_000072.6	100286359	100289358	Rybp	-	0	6	0	9	15	9	3
NC_000068.7	181598492	181601491	Samd10	-	0	5	0	6	11	6	3
NC_000077.6	95007758	95010757	Samd14	+	0	4	0	9	12	9	3
NC_000077.6	57799637	57802636	Sap30l	+	0	6	0	13	18	14	3
NC_000076.6	61678304	61681303	Sar1a	+	0	5	0	2	7	3	3
NC_000085.6	5388305	5391304	Sart1	-	0	5	0	5	10	6	3
NC_000078.6	69986003	69989002	Sav1	-	0	5	0	6	11	7	3
NC_000071.6	124424952	124427951	Sbno1	-	0	4	0	6	10	6	3
NC_000081.6	96459851	96462850	Scaf11	-	0	6	0	9	15	11	3
NC_000082.6	90283504	90286503	Scaf4	-	0	5	0	13	16	13	3
NC_000083.6	3112972	3115971	Scaf8	+	0	4	0	9	13	10	3
NC_000079.6	94284827	94287826	Scamp1	-	0	8	0	7	14	7	3
NC_000068.7	156311705	156314704	Scand1	-	0	7	0	6	13	7	3
NC_000075.6	55937159	55940158	Scaper	-	0	5	0	3	8	3	3
NC_000073.6	31126036	31129035	Scn1b	-	0	5	0	7	12	7	3
NC_000075.6	45137042	45140041	Scn4b	+	0	5	0	8	13	9	3
NC_000068.7	152079529	152082528	Scrt2	+	0	5	0	8	12	9	3
NC_000076.6	89685292	89688291	Scyl2	-	0	6	0	5	11	7	3
NC_000077.6	117113172	117116171	Sec14l1	+	0	9	0	5	13	7	3
NC_000082.6	35362937	35365936	Sec22a	-	0	4	0	3	7	4	3
NC_000069.6	97899227	97902226	Sec22b	+	0	5	0	4	9	5	3
NC_000077.6	51756281	51759280	Sec24a	-	0	6	0	4	10	5	3
NC_000069.6	30790765	30793764	Sec62	+	0	4	0	6	10	6	3
NC_000081.6	89087107	89090106	Selo	+	0	7	0	4	11	6	3
NC_000069.6	58574658	58577657	Selt	+	0	5	0	4	9	4	3
NC_000071.6	17572816	17575815	Sema3c	+	0	5	0	5	9	6	3
NC_000075.6	107709476	107712475	Sema3f	-	0	5	0	5	9	6	3
NC_000082.6	35539154	35542153	Sema5b	+	0	6	0	13	19	15	3
NC_000075.6	57938135	57941134	Sema7a	+	0	7	0	8	14	10	3
NC_000068.7	121447198	121450197	Serf2	+	0	7	0	9	16	10	3
NC_000080.6	76556262	76559261	Serp2	-	0	4	0	5	8	5	3
NC_000079.6	34001795	34004794	Serpinb6a	-	0	4	0	5	9	5	3
NC_000073.6	27471840	27474839	Sertad3	+	0	5	0	6	11	7	3
NC_000068.7	77279593	77282592	Sestd1	-	0	6	0	5	10	6	3
NC_000084.6	79108392	79111391	Setbp1	-	0	4	0	13	17	14	3
NC_000071.6	123140105	123143104	Setd1b	+	0	7	4	10	15	11	3
NC_000072.6	113075267	113078266	Setd5	+	0	7	4	13	19	14	3
NC_000077.6	77928839	77931838	Sez6	+	0	9	0	7	16	9	3
NC_000077.6	3202347	3205346	Sfi1	-	0	6	0	8	13	8	3
NC_000067.6	165193444	165196443	Sft2d2	-	0	4	0	3	7	4	3
NC_000067.6	9796130	9799129	Sgk3	+	0	6	0	5	11	7	3
NC_000076.6	61146685	61149684	Sgpl1	-	0	5	0	12	16	12	3
NC_000079.6	104107724	104110723	Sgtb	+	0	4	0	7	10	7	3
NC_000069.6	144719403	144722402	Sh3glb1	-	0	5	0	6	11	6	3
NC_000081.6	89497705	89500704	Shank3	+	0	7	0	10	17	12	3
NC_000068.7	122368169	122371168	Shf	-	0	4	0	6	10	7	3
NC_000071.6	67605883	67608882	Shisa3	+	0	5	0	11	15	12	3
NC_000077.6	53454707	53457706	Shroom1	+	0	6	0	5	11	7	3
NC_000069.6	58691440	58694439	Siah2	-	0	10	0	9	18	11	3
NC_000075.6	51008082	51011081	Sik2	-	0	10	4	8	18	11	3
NC_000079.6	54501739	54504738	Simc1	+	0	6	0	6	12	8	3
NC_000075.6	57069991	57072990	Sin3a	+	0	4	0	7	11	8	3
NC_000074.6	125568864	125571863	Sipa1l2	-	0	5	0	10	15	11	3
NC_000076.6	63338036	63341035	Sirt1	-	0	6	0	6	12	7	3
NC_000083.6	85687255	85690254	Six2	-	0	6	0	15	21	16	3
NC_000070.6	155221593	155224592	Ski	-	0	4	5	12	15	12	3
NC_000069.6	31092804	31095803	Skil	+	0	11	0	14	25	16	3
NC_000080.6	103648076	103651075	Slain1	+	0	6	0	5	11	6	3
NC_000084.6	57876512	57879511	Slc12a2	+	0	6	0	8	14	9	3
NC_000072.6	6216235	6219234	Slc25a13	-	0	5	0	4	8	5	3
NC_000074.6	22397622	22400621	Slc25a15	-	0	6	0	5	11	7	3
NC_000078.6	108834877	108837876	Slc25a29	-	0	4	0	8	11	9	3
NC_000081.6	39111777	39114776	Slc25a32	-	0	4	0	9	12	9	3
NC_000077.6	102407676	102410675	Slc25a39	-	0	4	0	1	5	2	3
NC_000071.6	8420820	8423819	Slc25a40	+	0	6	0	6	12	7	3
NC_000082.6	45157677	45160676	Slc35a5	-	0	7	0	7	13	7	3
NC_000070.6	103214369	103217368	Slc35d1	-	0	5	0	7	11	8	3
NC_000076.6	117745359	117748358	Slc35e3	-	0	5	0	4	9	4	3
NC_000067.6	125558411	125561410	Slc35f5	+	0	5	0	5	10	6	3
NC_000081.6	96698725	96701724	Slc38a2	-	0	5	0	10	15	10	3
NC_000080.6	70350425	70353424	Slc39a14	-	0	4	0	9	13	10	3
NC_000084.6	24602818	24605817	Slc39a6	-	0	0	4	10	12	10	3
NC_000070.6	53438413	53441412	Slc44a1	+	0	4	0	9	13	10	3
NC_000081.6	97782365	97785364	Slc48a1	+	0	6	0	5	11	5	3
NC_000067.6	75543914	75546913	Slc4a3	+	0	4	0	2	5	3	3
NC_000080.6	14701011	14704010	Slc4a7	+	0	4	0	8	12	8	3
NC_000081.6	100759747	100762746	Slc4a8	+	0	6	0	7	13	8	3
NC_000074.6	106166836	106169835	Slc7a6	+	0	6	0	6	12	8	3
NC_000073.6	74553781	74556780	Slco3a1	-	0	5	0	10	14	11	3
NC_000075.6	70540468	70543467	Sltm	+	0	4	0	9	13	9	3
NC_000084.6	75365365	75368364	Smad7	+	0	6	0	17	22	17	3
NC_000067.6	23921451	23924450	Smap1	-	0	6	0	6	10	6	3
NC_000085.6	53598396	53601395	Smc3	+	0	4	0	6	9	6	3
NC_000067.6	152901685	152904684	Smg7	-	0	11	0	10	20	11	3
NC_000079.6	108042474	108045473	Smim15	+	0	4	0	5	9	6	3
NC_000072.6	29733497	29736496	Smo	+	0	9	0	6	15	7	3
NC_000068.7	131489784	131492783	Smox	+	0	7	0	5	12	5	3
NC_000068.7	84825935	84828934	Smtnl1	-	0	4	0	4	8	5	3
NC_000077.6	106919716	106922715	Smurf2	-	0	5	0	10	15	11	3
NC_000068.7	167536195	167539194	Snai1	+	0	4	0	7	11	8	3
NC_000078.6	105031280	105034279	Snhg10	-	0	4	4	15	18	16	3
NC_000078.6	111538946	111541945	Snora28	+	0	4	0	1	5	2	3
NC_000073.6	109518132	109521131	Snora3	+	0	4	0	3	7	3	3
NC_000079.6	38202914	38205913	Snrnp48	+	0	4	0	2	6	2	3
NC_000081.6	55906305	55909304	Sntb1	-	0	4	0	4	8	4	3
NC_000074.6	106933750	106936749	Sntb2	+	0	6	0	10	15	11	3
NC_000069.6	10439131	10442130	Snx16	-	0	4	0	4	7	4	3
NC_000079.6	113617565	113620564	Snx18	-	0	6	0	5	11	7	3
NC_000083.6	87105295	87108294	Socs5	+	0	6	0	13	18	14	3
NC_000077.6	97360296	97363295	Socs7	+	0	10	0	8	17	8	3
NC_000082.6	90218742	90221741	Sod1	+	0	5	0	4	9	5	3
NC_000082.6	91645824	91648823	Son	+	0	4	0	13	17	13	3
NC_000071.6	36397164	36400163	Sorcs2	-	0	8	0	5	13	7	3
NC_000085.6	48204025	48207024	Sorcs3	+	0	4	0	17	20	18	3
NC_000077.6	53479196	53482195	Sowaha	-	0	5	0	6	10	6	3
NC_000067.6	133423213	133426212	Sox13	-	0	5	0	7	11	8	3
NC_000080.6	118236031	118239030	Sox21	-	0	7	0	9	16	10	3
NC_000086.7	60892431	60895430	Sox3	-	0	6	0	9	15	11	3
NC_000080.6	63941706	63944705	Sox7	+	0	5	0	16	21	16	3
NC_000077.6	112780210	112783209	Sox9	+	0	8	0	11	18	11	3
NC_000068.7	72979447	72982446	Sp3	-	0	6	0	9	15	9	3
NC_000068.7	72977432	72980431	Sp3os	+	0	6	0	11	17	12	3
NC_000078.6	118300441	118303440	Sp4	-	0	4	0	13	16	13	3
NC_000069.6	146498839	146501838	Spata1	-	0	6	0	8	13	9	3
NC_000067.6	187214463	187217462	Spata17	-	0	4	0	1	5	1	3
NC_000074.6	123210816	123213815	Spata33	+	0	5	0	7	12	8	3
NC_000080.6	31000667	31003666	Spcs1	-	0	4	0	8	12	9	3
NC_000070.6	141537638	141540637	Spen	-	0	8	0	10	18	11	3
NC_000074.6	123330713	123333712	Spire2	+	0	6	0	6	11	7	3
NC_000077.6	72488921	72491920	Spns2	-	0	7	0	4	10	6	3
NC_000079.6	57907333	57910332	Spock1	-	0	4	0	9	13	10	3
NC_000077.6	19922442	19925441	Spred2	+	0	5	0	8	12	8	3
NC_000074.6	124895729	124898728	Sprtn	+	0	6	0	10	15	11	3
NC_000077.6	30267206	30270205	Sptbn1	-	0	8	0	8	16	10	3
NC_000070.6	148589513	148592512	Srm	+	0	5	0	4	8	5	3
NC_000084.6	34329121	34332120	Srp19	+	0	8	0	6	13	8	3
NC_000077.6	116852115	116855114	Srsf2	-	0	8	0	8	15	9	3
NC_000068.7	180040483	180043482	Ss18l1	+	0	4	0	13	16	13	3
NC_000079.6	91458978	91461977	Ssbp2	+	0	11	4	13	23	15	3
NC_000070.6	106909470	106912469	Ssbp3	+	0	6	0	12	17	12	3
NC_000084.6	70470454	70473453	Stard6	+	0	7	0	8	15	8	3
NC_000068.7	127268202	127271201	Stard7	+	0	4	0	4	8	5	3
NC_000068.7	166995300	166998299	Stau1	-	0	4	0	9	13	10	3
NC_000085.6	7039027	7042026	Stip1	-	0	4	0	8	12	9	3
NC_000083.6	34835904	34838903	Stk19	-	0	7	4	15	22	16	3
NC_000068.7	68470982	68473981	Stk39	-	0	6	0	7	13	7	3
NC_000074.6	47411460	47414459	Stox2	-	0	10	4	7	17	10	3
NC_000067.6	58971527	58974526	Stradb	+	0	4	0	7	11	7	3
NC_000078.6	51691429	51694428	Strn3	-	0	5	0	4	9	4	3
NC_000075.6	115309422	115312421	Stt3b	-	0	4	0	11	15	12	3
NC_000077.6	90637125	90640124	Stxbp4	-	0	4	0	3	7	4	3
NC_000071.6	135777411	135780410	Styxl1	-	0	6	0	12	17	12	3
NC_000080.6	73550774	73553773	Sucla2	+	0	4	0	3	6	4	3
NC_000071.6	117114994	117117993	Suds3	-	0	5	0	8	13	9	3
NC_000068.7	166154684	166157683	Sulf2	-	0	6	0	9	15	11	3
NC_000077.6	115535231	115538230	Sumo2	-	0	8	0	5	11	6	3
NC_000071.6	139198556	139201555	Sun1	+	0	6	0	5	11	6	3
NC_000081.6	79741537	79744536	Sun2	-	0	6	0	7	13	8	3
NC_000080.6	52196240	52199239	Supt16	-	0	5	0	8	13	9	3
NC_000067.6	151427451	151430450	Swt1	-	0	5	0	5	10	6	3
NC_000078.6	75816318	75819317	Syne2	+	0	4	0	8	11	8	3
NC_000069.6	103573242	103576241	Syt6	+	0	6	0	5	11	7	3
NC_000086.7	85571851	85574850	Tab3	+	0	4	0	3	7	4	3
NC_000067.6	166377167	166380166	Tada1	+	0	6	0	6	12	8	3
NC_000072.6	113376941	113379940	Tada3	-	0	6	0	8	13	9	3
NC_000083.6	27908243	27911242	Taf11	-	0	4	0	4	8	5	3
NC_000079.6	100649343	100652342	Taf9	+	0	4	0	10	14	10	3
NC_000072.6	113695055	113698054	Tatdn2	+	0	4	0	8	12	9	3
NC_000085.6	38834579	38837578	Tbc1d12	+	0	6	0	8	13	8	3
NC_000075.6	90269770	90272769	Tbc1d2b	-	0	4	0	3	7	3	3
NC_000075.6	42471277	42474276	Tbcel	-	0	4	0	2	5	3	3
NC_000081.6	82897462	82900461	Tbrg3	-	0	8	0	8	16	10	3
NC_000077.6	97114332	97117331	Tbx21	-	0	4	0	3	7	3	3
NC_000071.6	119668319	119671318	Tbx3	+	0	4	0	11	15	12	3
NC_000071.6	119670329	119673328	Tbx3os1	-	0	5	0	13	17	14	3
NC_000072.6	38873377	38876376	Tbxas1	+	0	11	0	4	15	6	3
NC_000086.7	136212914	136215913	Tceal7	+	0	5	0	3	7	3	3
NC_000084.6	42509065	42512064	Tcerg1	+	0	5	0	6	11	7	3
NC_000068.7	104711170	104714169	Tcp11l1	-	0	6	0	8	13	8	3
NC_000075.6	108305160	108308159	Tcta	-	0	4	0	9	13	10	3
NC_000083.6	28349806	28352805	Tead3	-	0	10	0	9	18	10	3
NC_000071.6	144222607	144225606	Tecpr1	-	0	4	0	6	9	7	3
NC_000071.6	118025748	118028747	Tesc	+	0	7	4	13	19	15	3
NC_000081.6	100551015	100554014	Tfcp2	-	0	4	0	6	10	7	3
NC_000074.6	13336726	13339725	Tfdp1	+	0	4	0	5	9	5	3
NC_000068.7	156837817	156840816	Tgif2	+	0	5	0	9	13	9	3
NC_000070.6	3572879	3575878	Tgs1	+	0	4	0	6	10	6	3
NC_000076.6	115383436	115386435	Thap2	-	0	5	0	14	19	14	3
NC_000067.6	93753839	93756838	Thap4	-	0	6	0	8	14	9	3
NC_000083.6	81064136	81067135	Thumpd2	-	0	4	0	5	9	5	3
NC_000068.7	84825021	84828020	Timm10	+	0	4	0	5	9	5	3
NC_000077.6	118354412	118357411	Timp2	-	0	4	0	7	10	7	3
NC_000076.6	81290582	81293581	Tjp3	-	0	4	0	8	11	8	3
NC_000074.6	104247578	104250577	Tk2	-	0	4	0	3	7	3	3
NC_000072.6	83069226	83072225	Tlx2	-	0	5	0	10	14	11	3
NC_000074.6	25015211	25018210	Tm2d2	+	0	4	0	7	11	7	3
NC_000067.6	74303337	74306336	Tmbim1	-	0	4	0	6	10	6	3
NC_000077.6	117779594	117782593	Tmc8	+	0	4	0	12	16	13	3
NC_000068.7	127245975	127248974	Tmem127	+	0	4	0	7	11	8	3
NC_000067.6	36938875	36941874	Tmem131	-	0	5	0	10	15	11	3
NC_000077.6	22510283	22513282	Tmem17	+	0	4	0	3	6	4	3
NC_000067.6	134361002	134364001	Tmem183a	-	0	4	0	6	10	6	3
NC_000081.6	79402304	79405303	Tmem184b	-	0	4	0	3	7	3	3
NC_000067.6	75477532	75480531	Tmem198	+	0	7	4	13	19	14	3
NC_000070.6	131917971	131920970	Tmem200b	+	0	7	0	10	16	10	3
NC_000075.6	59538675	59541674	Tmem202	-	0	4	0	7	11	8	3
NC_000072.6	24955126	24958125	Tmem229a	-	0	6	0	10	16	11	3
NC_000078.6	102741712	102744711	Tmem251	+	0	4	0	6	10	7	3
NC_000080.6	52013275	52016274	Tmem253	+	0	5	0	7	11	7	3
NC_000075.6	79792431	79795430	Tmem30a	-	0	5	0	6	11	7	3
NC_000081.6	58822662	58825661	Tmem65	-	0	5	0	6	11	7	3
NC_000070.6	3573849	3576848	Tmem68	-	0	4	0	7	11	7	3
NC_000070.6	116556042	116559041	Tmem69	-	0	5	0	10	14	11	3
NC_000073.6	47048640	47051639	Tmem86a	+	0	4	0	4	8	5	3
NC_000073.6	109751264	109754263	Tmem9b	-	0	4	0	7	11	8	3
NC_000074.6	34964691	34967690	Tnks	-	0	6	0	2	8	4	3
NC_000077.6	117652125	117655124	Tnrc6c	+	0	6	0	10	15	10	3
NC_000068.7	164070182	164073181	Tomm34	-	0	6	0	8	14	9	3
NC_000068.7	160643897	160646896	Top1	+	0	7	0	10	16	10	3
NC_000080.6	16363206	16366205	Top2b	+	0	4	0	11	15	11	3
NC_000070.6	40267579	40270578	Toporsos	+	0	4	0	9	10	9	3
NC_000068.7	32755234	32758233	Tor2a	+	0	5	0	8	13	8	3
NC_000080.6	75843256	75846255	Tpt1	+	0	7	0	12	19	13	3
NC_000068.7	152845964	152848963	Tpx2	+	0	4	0	2	6	2	3
NC_000081.6	89074052	89077051	Trabd	+	0	6	0	10	15	11	3
NC_000078.6	111164370	111167369	Traf3	+	0	4	0	4	8	5	3
NC_000067.6	58972483	58975482	Trak2	-	0	4	0	7	11	7	3
NC_000076.6	114800371	114803370	Trhde	-	0	5	0	13	18	13	3
NC_000077.6	58976075	58979074	Trim11	+	0	5	0	12	17	13	3
NT_187009.1	789770	792769	Trim26	+	0	5	0	2	7	3	3
NC_000080.6	66295025	66298024	Trim35	+	0	4	0	6	9	6	3
NC_000083.6	36271005	36274004	Trim39	-	0	4	0	6	10	6	3
NC_000085.6	46499648	46502647	Trim8	+	0	7	5	19	24	20	3
NC_000067.6	151426547	151429546	Trmt1l	+	0	5	0	5	10	6	3
NC_000067.6	143776059	143779058	Trove2	-	0	6	0	11	17	11	3
NC_000077.6	69578359	69581358	Trp53	+	0	5	0	8	13	9	3
NC_000068.7	155379807	155382806	Trp53inp2	+	0	4	0	5	9	6	3
NC_000080.6	76412635	76415634	Tsc22d1	+	0	6	5	9	15	11	3
NC_000069.6	58413536	58416535	Tsc22d2	+	0	5	0	17	22	18	3
NC_000074.6	125010997	125013996	Tsnax	+	0	4	0	7	11	8	3
NC_000073.6	141473236	141476235	Tspan4	+	0	6	0	8	13	8	3
NT_187023.1	1091863	1094862	Tssk3	-	0	6	0	7	12	8	3
NC_000077.6	62279459	62282458	Ttc19	+	0	6	0	6	12	7	3
NC_000071.6	110877784	110880783	Ttc28	+	0	4	0	4	8	5	3
NC_000070.6	20005909	20008908	Ttpa	+	0	4	0	6	10	7	3
NC_000068.7	163600281	163603280	Ttpal	+	0	6	0	3	9	5	3
NC_000077.6	86542991	86545990	Tubd1	+	0	5	0	8	13	9	3
NC_000081.6	94588885	94591884	Twf1	-	0	7	0	7	12	7	3
NC_000083.6	65950188	65953187	Twsg1	-	0	9	0	2	11	5	3
NC_000082.6	11133680	11136679	Txndc11	-	0	4	0	9	13	10	3
NC_000072.6	89641988	89644987	Txnrd3	+	0	6	0	7	13	9	3
NC_000068.7	26020782	26023781	Ubac1	-	0	7	0	5	12	7	3
NC_000069.6	135436237	135439236	Ube2d3	+	0	6	0	9	14	10	3
NC_000070.6	33029387	33032386	Ube2j1	+	0	4	0	9	11	9	3
NC_000076.6	95513162	95516161	Ube2n	+	0	9	0	6	15	9	3
NC_000079.6	69738898	69741897	Ube2ql1	-	0	4	4	12	16	13	3
NC_000070.6	41134021	41137020	Ube2r2	+	0	9	0	7	16	9	3
NC_000077.6	96064365	96067364	Ube2z	-	0	4	0	6	10	7	3
NC_000075.6	113928934	113931933	Ubp1	+	0	13	4	5	18	9	3
NC_000070.6	139378659	139381658	Ubr4	+	0	4	0	5	9	5	3
NC_000081.6	38077855	38080854	Ubr5	-	0	8	0	10	16	11	3
NC_000085.6	41979763	41982762	Ubtd1	+	0	8	0	14	22	14	3
NC_000067.6	143775218	143778217	Uchl5	+	0	6	0	11	17	11	3
NC_000080.6	119098451	119101450	Uggt2	-	0	4	0	3	7	3	3
NC_000069.6	125937684	125940683	Ugt8a	-	0	6	0	8	14	9	3
NC_000077.6	61854323	61857322	Ulk2	-	0	10	0	5	15	8	3
NC_000076.6	60830599	60833598	Unc5b	-	0	6	0	3	9	4	3
NC_000078.6	102946328	102949327	Unc79	+	0	5	0	6	10	6	3
NC_000085.6	3933186	3936185	Unc93b1	+	0	5	0	9	11	9	3
NC_000074.6	70352423	70355422	Upf1	-	0	5	0	6	10	7	3
NC_000068.7	58565282	58568281	Upp2	+	0	9	4	9	18	11	3
NC_000070.6	116074071	116077070	Uqcrh	-	0	12	0	12	24	14	3
NC_000074.6	95329717	95332716	Usb1	+	0	9	0	7	16	10	3
NC_000073.6	30956368	30959367	Usf2	-	0	8	0	7	15	9	3
NC_000082.6	44171236	44174235	Usf3	+	0	4	0	6	9	6	3
NC_000071.6	92135909	92138908	Uso1	+	0	6	0	9	15	10	3
NC_000074.6	119908360	119911359	Usp10	+	0	5	0	4	9	5	3
NC_000076.6	123196020	123199019	Usp15	-	0	5	0	7	12	8	3
NC_000070.6	106314213	106317212	Usp24	+	0	5	0	11	15	11	3
NC_000073.6	121706862	121709861	Usp31	-	0	4	0	3	6	3	3
NC_000075.6	108345818	108348817	Usp4	+	0	7	0	5	12	7	3
NC_000077.6	67921154	67924153	Usp43	-	0	6	0	11	16	12	3
NC_000073.6	112021483	112024482	Usp47	+	0	5	0	6	11	7	3
NC_000069.6	122983448	122986447	Usp53	-	0	4	0	7	10	8	3
NC_000076.6	8517826	8520825	Ust	-	0	8	0	5	13	6	3
NC_000076.6	12868690	12871689	Utrn	-	0	4	0	4	7	5	3
NC_000083.6	65612940	65615939	Vapa	-	0	5	0	8	12	8	3
NT_187004.1	2000564	2003563	Vars2	-	0	4	0	4	7	5	3
NC_000080.6	20927378	20930377	Vcl	+	0	4	0	7	11	7	3
NC_000074.6	54075532	54078531	Vegfc	+	0	4	0	3	7	3	3
NC_000082.6	65813015	65816014	Vgll3	+	0	5	0	9	13	9	3
NC_000071.6	129940109	129943108	Vkorc1l1	+	0	6	0	2	8	3	3
NC_000070.6	145194371	145197370	Vps13d	-	0	4	0	4	7	4	3
NC_000074.6	40509783	40512782	Vps37a	+	0	4	0	10	14	11	3
NC_000074.6	107029326	107032325	Vps4a	+	0	4	0	6	10	6	3
NC_000083.6	33953785	33956784	Vps52	+	0	4	0	7	11	7	3
NC_000085.6	55314057	55317056	Vti1a	+	0	6	0	8	14	10	3
NC_000084.6	7866832	7869831	Wac	+	0	6	0	9	15	10	3
NC_000067.6	181210979	181213978	Wdr26	-	0	8	0	11	17	13	3
NC_000077.6	121353448	121356447	Wdr45b	-	0	5	0	5	9	6	3
NC_000075.6	119892895	119895894	Wdr48	+	0	6	0	4	10	6	3
NC_000073.6	30279422	30282421	Wdr62	-	0	4	0	7	11	8	3
NC_000068.7	59881621	59884620	Wdsub1	-	0	7	0	2	8	3	3
NC_000070.6	63495077	63498076	Whrn	-	0	4	0	9	13	10	3
NC_000071.6	33818730	33821729	Whsc1	+	0	8	0	8	16	10	3
NC_000074.6	25599508	25602507	Whsc1l1	+	0	9	0	5	14	7	3
NC_000077.6	103772175	103775174	Wnt3	+	0	5	0	13	18	14	3
NC_000070.6	137275635	137278634	Wnt4	+	0	10	0	10	19	11	3
NC_000080.6	28503473	28506472	Wnt5a	+	0	4	0	9	13	10	3
NC_000072.6	119543825	119546824	Wnt5b	-	0	6	4	9	13	10	3
NC_000081.6	85580822	85583821	Wnt7b	-	0	8	0	13	19	13	3
NC_000077.6	59304849	59307848	Wnt9a	+	0	4	0	7	11	8	3
NC_000070.6	19708007	19711006	Wwp1	-	0	5	0	5	10	6	3
NC_000074.6	107434334	107437333	Wwp2	+	0	9	0	5	13	7	3
NC_000069.6	57574911	57577910	Wwtr1	-	0	7	4	10	16	12	3
NC_000085.6	53037655	53040654	Xpnpep1	-	0	4	0	9	13	10	3
NC_000073.6	126199520	126202519	Xpo6	-	0	4	0	7	11	8	3
NC_000076.6	121625524	121628523	Xpot	-	0	5	0	6	11	6	3
NC_000070.6	119293667	119296666	Ybx1	-	0	6	0	8	14	9	3
NC_000077.6	86992844	86995843	Ypel2	-	0	4	0	7	11	8	3
NC_000070.6	124848759	124851758	Yrdc	+	0	9	0	7	16	10	3
NC_000068.7	180919937	180922936	Ythdf1	-	0	7	0	7	14	9	3
NC_000078.6	76368192	76371191	Zbtb1	+	0	9	0	14	23	15	3
NC_000082.6	55973618	55976617	Zbtb11os1	-	0	4	0	10	14	11	3
NC_000070.6	141442659	141445658	Zbtb17	+	0	6	0	6	10	6	3
NC_000078.6	76369217	76372216	Zbtb25	-	0	7	0	12	19	12	3
NC_000076.6	127737538	127740537	Zbtb39	+	0	7	0	4	10	5	3
NC_000077.6	69763912	69766911	Zbtb4	+	0	5	0	4	9	5	3
NC_000070.6	129333592	129336591	Zbtb8os	+	0	6	0	7	13	8	3
NC_000079.6	59822170	59825169	Zcchc6	-	0	6	0	5	10	5	3
NC_000079.6	91806998	91809997	Zcchc9	-	0	5	0	6	11	7	3
NC_000076.6	111009067	111012066	Zdhhc17	-	0	9	0	8	17	11	3
NC_000085.6	55315033	55318032	Zdhhc6	-	0	6	0	8	14	10	3
NC_000074.6	120100473	120103472	Zdhhc7	-	0	4	0	9	13	10	3
NC_000068.7	45109138	45112137	Zeb2os	+	0	5	0	9	14	10	3
NC_000083.6	30003039	30006038	Zfand3	+	0	6	0	10	16	12	3
NC_000076.6	115382943	115385942	Zfc3h1	+	0	5	0	14	19	14	3
NC_000073.6	110059670	110062669	Zfp143	+	0	4	0	9	13	9	3
NC_000084.6	82692101	82695100	Zfp236	-	0	5	0	13	17	13	3
NC_000078.6	40444791	40447790	Zfp277	-	0	5	0	11	15	12	3
NC_000086.7	48593649	48596648	Zfp280c	-	0	4	0	6	10	7	3
NC_000067.6	136622901	136625900	Zfp281	+	0	8	0	6	14	6	3
NC_000074.6	95330951	95333950	Zfp319	-	0	9	0	7	16	10	3
NC_000068.7	164910751	164913750	Zfp335	-	0	5	0	13	18	13	3
NC_000068.7	164909268	164912267	Zfp335os	+	0	5	0	13	17	13	3
NC_000077.6	50826732	50829731	Zfp354c	-	0	5	0	2	7	2	3
NC_000074.6	3491075	3494074	Zfp358	+	0	6	0	3	9	5	3
NC_000080.6	65356676	65359675	Zfp395	+	0	6	0	8	13	9	3
NC_000074.6	87958596	87961595	Zfp423	-	0	13	6	18	30	22	3
NC_000068.7	181592218	181595217	Zfp512b	-	0	4	0	5	9	5	3
NC_000071.6	38683827	38686826	Zfp518b	-	0	4	0	5	9	5	3
NC_000073.6	80991684	80994683	Zfp592	+	0	9	0	7	16	9	3
NC_000075.6	65826565	65829564	Zfp609	-	0	11	0	6	17	9	3
NC_000081.6	75938952	75941951	Zfp623	+	0	6	0	5	10	6	3
NC_000073.6	127614786	127617785	Zfp629	-	0	7	0	6	12	6	3
NC_000073.6	127874805	127877804	Zfp646	+	0	5	0	9	13	9	3
NC_000075.6	121757309	121760308	Zfp651	+	0	5	0	9	12	10	3
NC_000075.6	22070377	22073376	Zfp653	-	0	5	0	5	9	5	3
NC_000082.6	64850999	64853998	Zfp654	-	0	8	0	10	17	10	3
NC_000069.6	9609086	9612085	Zfp704	-	0	6	0	6	12	7	3
NC_000081.6	37006403	37009402	Zfp706	-	0	5	0	6	11	7	3
NC_000072.6	48085695	48088694	Zfp746	-	0	5	0	7	11	7	3
NC_000073.6	5037447	5040446	Zfp784	-	0	5	0	3	8	4	3
NC_000074.6	109703494	109706493	Zfp821	+	0	5	0	5	10	5	3
NC_000078.6	110848248	110851247	Zfp839	+	0	4	0	5	8	6	3
NC_000085.6	12795124	12798123	Zfp91	-	0	4	0	6	10	7	3
NC_000074.6	122280141	122283140	Zfpm1	+	0	4	0	8	11	9	3
NC_000080.6	122473384	122476383	Zic2	+	0	6	0	15	21	17	3
[truncated: 1,583 more rows]

[truncated: 1 more sheets: 11. TET1 targets and 5hmC]
