# Supplementary material for: Epigenetic remodelling licences adult cholangiocytes for organoid formation and liver regeneration
Source: Springer Nature journal article supplement (doi:10.1038/s41556-019-0402-6), 2019-11-01
Supplement: MOESM8 [file 41556_2019_402_MOESM8_ESM.xlsx]

## Sheet: Supp Table Info
Supplementary Dataset 3
Supplementary Dataset 3_S1	siRNA list
Supplementary Dataset 3_S2	Antibody list
Supplementary Dataset 3_S3	Primer list

## Sheet: S1_siRNA list
siRNA used are listed
Pool catalog Number	Gene Symbol	Gene ID	Gene Accession	Sequence
D-001810-10-20	Non targeting
L-040694-01	Arid1a	93760	XM_992304	AGAUGUGGGUGGACCGGUA
L-040694-01	Arid1a	93760	XM_992304	AAGCAUUGCCCAAGAUCGA
L-040694-01	Arid1a	93760	XM_992304	GGACAGGGGAUCAAUAGUA
L-040694-01	Arid1a	93760	XM_992304	CCUUGGGGAUGUUAAGUUA
L-053908-01	Arid1b	239985	XM_898196	CGAUGGACCCAAUGGUGAU
L-053908-01	Arid1b	239985	XM_898196	CAAGAAGGCUAUGGAACUA
L-053908-01	Arid1b	239985	XM_898196	CAGUUGUAUGGGAUGGGUA
L-053908-01	Arid1b	239985	XM_898196	CCAUGAAGACUUGAAUUUA
L-054678-01	Arid5b	71371	NM_023598	GGUCCAUGCUUAAACGGAU
L-054678-01	Arid5b	71371	NM_023598	CGGAGAAGAUCCACGUCAA
L-054678-01	Arid5b	71371	NM_023598	GUGAUGAGUUCGCGCCAAA
L-054678-01	Arid5b	71371	NM_023598	ACAAUAACUGUGACGGUAA
L-044249-00	Smarcc1	20588	NM_009211	CCGAAUGGAUCGUAACGUU
L-044249-00	Smarcc1	20588	NM_009211	CAUCCUGGUUUGAUUAUAA
L-044249-00	Smarcc1	20588	NM_009211	GAAGUUGGCUAACAAGUUG
L-044249-00	Smarcc1	20588	NM_009211	GAACAACUGUCUGACUAGA
L-065628-01	Cbx6	494448	NM_028763	ACGUAUUAACGCAGCGAUU
L-065628-01	Cbx6	494448	NM_028763	AGUCAGAGGUGCUCGAUCU
L-065628-01	Cbx6	494448	NM_028763	GAAAGCGGCUGACGGGUAA
L-065628-01	Cbx6	494448	NM_028763	GUUAAUGGCAGGAACCUAA
L-045497-00	Dnajc2	22791	NM_009583	GAUCAAAGCAGCUCAUAAA
L-045497-00	Dnajc2	22791	NM_009583	CUUCGGAACUCGUGCAAGA
L-045497-00	Dnajc2	22791	NM_009583	GAAGUGGGAGUGGCAGUAA
L-045497-00	Dnajc2	22791	NM_009583	GGAAUCACUUCUCGGACAA
L-040287-02	Hdac1	433759	NM_008228	GGGAGAAGGUGGUCGCAAG
L-040287-02	Hdac1	433759	NM_008228	ACUAUGGUCUCUACCGAAA
L-040287-02	Hdac1	433759	NM_008228	UGAACUACCCACUGCGAGA
L-040287-02	Hdac1	433759	NM_008228	CCAGAACACUAACGAGUAC
L-046158-00	Hdac2	15182	NM_008229	CCAAUGAGUUGCCAUAUAA
L-046158-00	Hdac2	15182	NM_008229	CAAUUGGGCUGGAGGACUA
L-046158-00	Hdac2	15182	NM_008229	ACAGGAGACUUGAGGGAUA
L-046158-00	Hdac2	15182	NM_008229	CAAAAGUGAUGGAGAUGUA
L-047318-00	Mbd3	17192	NM_013595	GCAACAAGGUCAAGAGCGA
L-047318-00	Mbd3	17192	NM_013595	GAAGCUAAGUGGAUUGAGU
L-047318-00	Mbd3	17192	NM_013595	UGGAGGAGCUUGCCCGAGA
L-042769-01	Rybp	56353	NM_019743	GGAGAGUGAAUGAAUAGUA
L-042769-01	Rybp	56353	NM_019743	CAUUAAGCAUGUGGUGUUA
L-042769-01	Rybp	56353	NM_019743	GCGAAUGCUUGUUAAGUAU
L-056591-00	Smarca2	67155	NM_026003	AGACUUACCAGAAUACUAU
L-056591-00	Smarca2	67155	NM_026003	UAAAGGAGCGAAUCCGUAA
L-056591-00	Smarca2	67155	NM_026003	GGAGAAAGACGUCAUGCUU
L-056591-00	Smarca2	67155	NM_026003	CGAAAUCUGUGAAGGUGAA
L-041135-00	Smarca4	20586	NM_011417	GAGCGAAUGCGGAGGCUUA
L-041135-00	Smarca4	20586	NM_011417	CAAACUGGGCGUAUGAAUU
L-041135-00	Smarca4	20586	NM_011417	GAGACUAUCCUCAUUAUUC
L-041135-00	Smarca4	20586	NM_011417	GAUCCUCACUGGCACAGAU
L-062861-01	Tet1	52463	XM_920196	AGGAAGAGGCGACUACGUU
L-062861-01	Tet1	52463	XM_920196	GGUUGGAAGCUGUUCGCUA
L-062861-01	Tet1	52463	XM_920196	AUUUCAACUCCGACGUAAA
L-062861-01	Tet1	52463	XM_920196	CCACAUCAACACACGGAGU
L-058965-00	Tet2	214133	XM_895573	ACUCAUGGGUCAAUUCUUA
L-058965-00	Tet2	214133	XM_895573	GUACUUAAGUUAUGGAAAC
L-058965-00	Tet2	214133	XM_895573	GGAAGAGUGCGGAAAGAAU
L-058965-00	Tet2	214133	XM_895573	GAAAGCAGCUCGAAAGCGU
L-054156-01	Tet3	194388	XM_977752	CCACAUAAGCUGACGCAAA
L-054156-01	Tet3	194388	XM_977752	AGGCCAAGCUCUACGGGAA
L-054156-01	Tet3	194388	XM_977752	GGUGAGUACUGGGCCGAAA
L-054156-01	Tet3	194388	XM_977752	GUGCAAGGGUCAGGCGUUU

## Sheet: S2_antibodies list
	Antibodies used are listed
Protein/Mark Name	Supplier	Catalogue	Dilution
FACS
PE-Cy7 CD45	BD Biosciences	552848	1:100
PE-Cy7 CD31	Abcam	ab46733	1:100
PE-Cy7 CD11b	BD Biosciences	552850	1:100
APC-CD326 (EpCAM)	eBioscience	17-591-80	1:100
Western Blot
TET1	Millipore	09-872	1:1000
ACTIN	Abcam	ab3280	1:2000
Immunostaining/Immunocytochemistry
Cleaved Caspase 3	Cell Signaling	9664T	1:250
5hmC	Active Motif	39791	1:1000
hMeDIP/MeDIP/ChIP
5mC	Abcam	ab10805	1:300
TET1	Millipore	09-872	1:100
5hmC	Active Motif	39791	1:300
TCF4	Santa Cruz	sc8631	1:250
H3K4me3	Diagenode	C15410003	1:1000
Immunohistochemistry/OCT staining
Ki67 (SP6)	Invitrogen	MA5-14520	1:200
Osteopontin	R&D systems	AF808	1:80
Pancytokeratin	Dako	Z0622	1:500
HNF4a	Abcam	ab181604	1:100

## Sheet: S3_primer list
Primer list
Gene Name	Forward	Reverse
RT-qPCR
Atf4	GAAACCTCATGGGTTCTCCA	GAAAAGGCATCCTCCTTGC
Arid1b	ATGGGTACTCACCCCCACTC	GGCAGTAGCCACTCACAGC
Arid5b	GGAAATGGCCAAAAACAAGA	TCCCCTTTACTTCAGGAGCA
Axin2	TGTCCAGCAAAACTCTTC	CTTCTCTTGAAGGACCTGA
Cbx6	GGAACCGGGTCATTGGGAAG	TAGAGCGCAAATGTGCCAAAC
Ctgf	CTGCCTACCGACTGGAAGAC	TAGAACAGGCGCTCCACTCT
Cyp3a11	CCTTCCAGCCTTGTAAGGAA	CCGTGGCACAACCTTTAGAA
Egfr	GAACCACGTCTGCAATCCTT	TCCACAAACTCCCTTGGTTC
Epcam	GACGACGTGGACATAGCTGA	GCTCTCCGTTCACTCTCAGG
Etv5	GCTCATAGAACCGGAAGAGG	GCGGCTCAGCTTGTCATAGT
Foxo3	GATAAGGGCGACAGCAACAG	CCGTGCCTTCATTCTGAAC
Gadd45b	CTCCTGGTCACGAACTGTCA	TTGCCTCTGCTCTCTTCACA
G6pc	GAATTACCAAGACTCCCAGG	TGAGACAATACTTCCGGAGG
Hdac1	GGGCACCAAGAGGAAAGTCT	AGCAAATTGTGAGTCATGCG
Hdac2	CATGGCGTACAGTCAAGGAG	TCATCCGGATTCTATGAGGC
Hprt	AAGCTTGCTGGTGAAAAGGA	TTGCGCTCATCTTAGGCTTT
Jun	ACCTTGAAAGCGCAAAACTC	TGAGTTGGCACCCACTGTTA
Ki67	CCTTTGCTGTCCCCGAAGA	GGCTTCTCATCTGTTGCTTCCT
Lgr5	GGAAATGCTTTGACACACATT	GGAATTCATCAAGGTTATTATA
Nf2	GAGGCTCCTGCAGATGAAAG	TCTGAGCCTTTTCAGCCAAC
Ptprs	ACTCATCACCTGCCAACCTC	CGGCCACACAAGTGATATTC
Smarca4	CAAAGACAAGCATATCCTAGCCA	CACGTAGTGTGTGTTAAGGACC
Smarcc1/Baf155	TGGCTGAGACCAGTGATGAG	ATGAACCTTCCAGGGCTTTT
Socs2	GAGCTCAGTCAAACAGGATGG	TTCCTTCTGGAGCCTCTTTT
Sox9	CTCCTAATGCTATCTTCAAG	GCTTCAGATCAACTTTGC
Sulf2	GTACCAGACAGCATGCGAAC	ATGGGGCCTTTACATTTGTG
Tead1	GCTTGAAGGAGCTGTTTGGA	CGTCGTCTTGGATATTGCAG
Tet1	ACAAGCAGATGGCTCCAGTT	GCAACAGGTGACACCAGAGA
Tet2	ATCCAAACCGAAGCTGAATG	CTTGCCCTACCACCGTTTTA
Tet3	TCCGGATTGAGAAGGTCATC	TCCTCCAGTGTGTGTCTTCG
Trop2	CACGGCTCAGAGCAACTGTA	AATACCTGTGAGCCCATTGC
Wwtr1	TCTCGCAATGAATCACCAAC	CCTGTGGGTTGGTTCTGAGT
ChIP/hMeDIP/MeDIP
Atf4 TSS	GTGATAACCTGGCAGCTTCG	GATCGCTCGTTGACGAATTT
Axin2 TSS	GGGAGGAGACATGAGCAGAG	CCGCGTTAACCCTTCCTT
Ctgf TSS	AGCGTCCAGACACCAACCTC	GTAGGAGGATGCACAGCAG
Cyp3a11 TSS	CCCAGGTTTCCAGTGAGAGA	AGGGAAGCATTGAGGAGGAT
Egfr TSS	CTCCCAGACAGACGACAGGT	AATCCGAGACAGACGGAGTC
Etv5 TSS	TCATAAAGTCACCCACATTCAGA	GCATGTGTGATCAGGAGCAA
Foxo3 TSS	AGGTCAGAAACGGGAAGGAG	ATGCAGTCCGAGAGATTTGG
GAdd45b TSS	GGGTGCCTTGGTAGTTCTCA	CGGCCTTGTAGAGTTGGAGA
G6pc TSS	GGGCTGGATTGACCTACAGA	CCTTCCTCCCTTGGTACCTC
Jak1 TSS	GCCGGTGCGTTTTTAGAG	GCCGGTGCGTTTTTAGAG
Lgr5 downstream TSS	GGAAACCTAGGAGGCTGGTC	TGCTAGGCAGTGAGTGGTTG
Lgr5 TSS	GGGAGCCCTCTCTCTGAAGT	CTGCTGCACACAGCTCAGAC
Lgr5 upstream TSS	TCGGAGATGTCTGCAGTGTC	GACATCAAAGGGCGTTGTTT
Nf2 TSS	GTCTGTTCTCGGCGTTGAGT	CGCTCCTTCTCAACCAGTCT
Pten TSS	TCAGGTGCTCTGACTCGTTG	GTGATCCATTCCTGCCAGTT
Ptk2 TSS	CTCTGAAGACGGTCCGAAAG	GAAAGGCTTCCCCAGTCTTA
Ptprs TSS	GAGCAGGGAAAAGGGGTAAC	AACCCCAGCACCACTATGAG
Socs2	TGCTTTCAGATGTAGGGTGCT	ATGGCAGCCAAGTTCAGACT
Sulf2 TSS	AGAGCCCACCAGTAGCTTCA	TCTGACCTTGGGCCAATAAC
Tead1 TSS	GGCCCGTTTGAAAGAAAGTT	TGTGAGCCCCACTTCTTAAA
Trop2 downstream TSS	CACCTCATTCTCCCATGCTT	GCTTGCTATTGGGAGTTGGA
Trop2 TSS	CATCGCCAGCAGTAGCAGTA	CTTCAGAATCCCTGCCTCTG
Trop2 upstream TSS	GGAAGTTGGCACTGGGATTA	CGTTGCCCTAACCCTAACAC
Tsc1 TSS	AGGTGTGCCAAAGACAGAGG	CTCGGAACAAGCACAGTCAA
Jun TSS	ATCCAGCCTGAGCTCAACAC	GAGAACGACGCAAGCCAAT
Wwtr1 TSS	TCAAGGGGTTATGGACAAAAA	AGCGCTCAGGACAGACTCAT
