# Supplementary material for: Epigenetic remodelling licences adult cholangiocytes for organoid formation and liver regeneration
Source: Springer Nature journal article supplement (doi:10.1038/s41556-019-0402-6), 2019-11-01
Supplement: MOESM16 [file 41556_2019_402_MOESM16_ESM.xlsx]

## Sheet: Figure 7
Figure 7
Figure 7B-C Ductal size and proliferation in WT and Tet1hypo mice at different timepoints before, during and after acute DDC damage. Different mice are indicated.
Timepoint	Genotype	Mouse	OPN+ (Ductal cell)	Ki67 (proliferative ductal cells)	%
Day0	WT	1	8	0	0
Day0	WT	1	3	0	0		NB - Some values of ductal proliferation were not counted due to technical reasons and are marked with ND and not included in analysis
Day0	WT	1	1	0	0
Day0	WT	1	4	0	0
Day0	WT	1	10	0	0
Day0	WT	1	3	0	0
Day0	WT	1	4	0	0
Day0	WT	1	11	0	0
Day0	WT	1	4	0	0
Day0	WT	1	7	0	0
Day0	WT	1	5	0	0
Day0	WT	1	15	0	0
Day0	WT	1	4	0	0
Day0	WT	1	3	0	0
Day0	WT	1	5	0	0
Day0	WT	1	27	0	0
Day0	WT	1	22	0	0
Day0	WT	1	6	0	0
Day0	WT	2	40	1	2.5
Day0	WT	2	20	0	0
Day0	WT	2	25	0	0
Day0	WT	2	31	1	3.22581
Day0	WT	2	14	0	0
Day0	WT	2	17	0	0
Day0	WT	2	8	0	0
Day0	WT	2	27	0	0
Day0	WT	2	29	0	0
Day0	WT	2	67	1	1.49254
Day0	WT	2	17	1	5.88235
Day0	WT	2	20	0	0
Day0	WT	2	32	0	0
Day0	WT	2	48	1	2.08333
Day0	WT	2	63	1	1.5873
Day0	WT	2	28	1	3.57143
Day0	WT	2	121	0	0
Day0	WT	3	12	0	0
Day0	WT	3	16	1	6.25
Day0	WT	3	14	0	0
Day0	WT	3	20	0	0
Day0	WT	3	33	1	3.0303
Day0	WT	3	14	2	14.2857
Day0	WT	3	61	3	4.91803
Day0	WT	3	51	1	1.96078
Day0	WT	3	12	0	0
Day0	WT	3	9	0	0
Day0	WT	3	9	1	11.1111
Day0	WT	3	11	0	0
Day0	WT	3	18	1	5.55556
Day0	WT	3	11	0	0
Day0	WT	3	14	0	0
Day0	WT	3	5	0	0
Day0	WT	3	72	2	2.77778
Day0	WT	3	16	0	0
Day0	WT	3	48	0	0
Day0	WT	3	19	0	0
Day0	HYPO	1	30	1	3.33333
Day0	HYPO	1	14	0	0
Day0	HYPO	1	16	1	6.25
Day0	HYPO	1	23	1	4.34783
Day0	HYPO	1	18	0	0
Day0	HYPO	1	16	0	0
Day0	HYPO	1	26	1	3.84615
Day0	HYPO	1	24	0	0
Day0	HYPO	1	27	0	0
Day0	HYPO	1	28	1	3.57143
Day0	HYPO	1	33	0	0
Day0	HYPO	1	18	1	5.55556
Day0	HYPO	1	38	0	0
Day0	HYPO	1	16	0	0
Day0	HYPO	1	29	0	0
Day0	HYPO	1	13	0	0
Day0	HYPO	1	18	1	5.55556
Day0	HYPO	2	32	1	3.125
Day0	HYPO	2	21	1	4.7619
Day0	HYPO	2	15	0	0
Day0	HYPO	2	16	0	0
Day0	HYPO	2	41	0	0
Day0	HYPO	2	39	1	2.5641
Day0	HYPO	2	28	0	0
Day0	HYPO	2	29	0	0
Day0	HYPO	2	18	0	0
Day0	HYPO	2	20	0	0
Day0	HYPO	2	79	0	0
Day0	HYPO	2	7	0	0
Day0	HYPO	2	20	0	0
Day0	HYPO	2	32	0	0
Day0	HYPO	2	47	0	0
Day0	HYPO	2	60	0	0
Day0	HYPO	2	21	0	0
Day0	HYPO	2	20	0	0
Day0	HYPO	2	24	0	0
Day0	HYPO	3	16	0	0
Day0	HYPO	3	49	3	6.12245
Day0	HYPO	3	31	2	6.45161
Day0	HYPO	3	45	1	2.22222
Day0	HYPO	3	23	1	4.34783
Day0	HYPO	3	40	0	0
Day0	HYPO	3	47	2	4.25532
Day0	HYPO	3	9	0	0
Day0	HYPO	3	41	0	0
Day0	HYPO	3	25	0	0
Day0	HYPO	3	15	0	0
Day0	HYPO	3	35	0	0
Day0	HYPO	3	7	0	0
Day0	HYPO	3	6	0	0
Day0	HYPO	3	5	0	0
Day0	HYPO	3	16	1	6.25
Day0	HYPO	3	18	0	0
Day0	HYPO	3	8	1	12.5
Day0	HYPO	3	14	0	0
Day0	HYPO	3	62	3	4.83871
Day5	WT	1	140	80	57.1429
Day5	WT	1	121	47	38.843
Day5	WT	1	33	7	21.2121
Day5	WT	1	85	39	45.8824
Day5	WT	1	127	46	36.2205
Day5	WT	1	127	59	46.4567
Day5	WT	1	102	46	45.098
Day5	WT	1	100	42	42
Day5	WT	1	39	15	38.4615
Day5	WT	1	54	12	22.2222
Day5	WT	1	80	31	38.75
Day5	WT	1	135	61	45.1852
Day5	WT	1	79	43	54.4304
Day5	WT	1	90	46	51.1111
Day5	WT	1	128	82	64.0625
Day5	WT	1	85	28	32.9412
Day5	WT	1	155	77	49.6774
Day5	WT	1	117	47	40.1709
Day5	WT	1	124	47	37.9032
Day5	WT	1	197	87	44.1624
Day5	WT	1	144	62	43.0556
Day5	WT	1	64	23	35.9375
Day5	WT	1	71	26	36.6197
Day5	WT	1	173	81	46.8208
Day5	WT	1	139	55	39.5683
Day5	WT	1	155	49	31.6129
Day5	WT	1	50	16	32
Day5	WT	1	58	20	34.4828
Day5	WT	1	121	37	30.5785
Day5	WT	1	141	44	31.2057
Day5	WT	1	131	56	42.7481
Day5	WT	1	133	48	36.0902
Day5	WT	1	90	40	44.4444
Day5	WT	1	76	24	31.5789
Day5	WT	1	48	16	33.3333
Day5	WT	1	52	29	55.7692
Day5	WT	1	28	12	42.8571
Day5	WT	1	106	43	40.566
Day5	WT	1	108	47	43.5185
Day5	WT	1	28	12	42.8571
Day5	WT	1	57	24	42.1053
Day5	WT	2	208	30	14.4231
Day5	WT	2	219	62	28.3105
Day5	WT	2	93	11	11.828
Day5	WT	2	106	36	33.9623
Day5	WT	2	129	24	18.6047
Day5	WT	2	35	2	5.71429
Day5	WT	2	138	54	39.1304
Day5	WT	2	96	16	16.6667
Day5	WT	2	137	43	31.3869
Day5	WT	2	87	26	29.8851
Day5	WT	2	97	39	40.2062
Day5	WT	2	221	100	45.2489
Day5	WT	2	69	3	4.34783
Day5	WT	2	70	13	18.5714
Day5	WT	2	162	56	34.5679
Day5	WT	2	35	5	14.2857
Day5	WT	2	139	42	30.2158
Day5	WT	2	61	4	6.55738
Day5	WT	2	93	18	19.3548
Day5	WT	2	206	62	30.0971
Day5	WT	2	183	53	28.9617
Day5	WT	2	360	117	32.5
Day5	WT	2	267	121	45.3184
Day5	WT	2	149	47	31.5436
Day5	WT	2	279	95	34.0502
Day5	WT	2	133	43	32.3308
Day5	WT	2	59	22	37.2881
Day5	WT	2	77	27	35.0649
Day5	WT	2	188	52	27.6596
Day5	WT	2	264	78	29.5455
Day5	WT	2	135	22	16.2963
Day5	WT	2	130	26	20
Day5	WT	2	113	19	16.8142
Day5	WT	2	55	9	16.3636
Day5	WT	2	46	5	10.8696
Day5	WT	2	215	21	9.76744
Day5	WT	2	47	5	10.6383
Day5	WT	2	40	5	12.5
Day5	WT	2	158	18	11.3924
Day5	WT	2	62	2	3.22581
Day5	WT	2	26	2	7.69231
Day5	WT	2	56	9	16.0714
Day5	WT	2	98	20	20.4082
Day5	WT	2	56	6	10.7143
Day5	WT	2	38	2	5.26316
Day5	WT	2	55	5	9.09091
Day5	WT	2	89	15	16.8539
Day5	WT	3	129	8	6.20155
Day5	WT	3	112	9	8.03571
Day5	WT	3	66	3	4.54545
Day5	WT	3	91	4	4.3956
Day5	WT	3	135	14	10.3704
Day5	WT	3	106	5	4.71698
Day5	WT	3	113	3	2.65487
Day5	WT	3	91	11	12.0879
Day5	WT	3	61	4	6.55738
Day5	WT	3	47	4	8.51064
Day5	WT	3	65	4	6.15385
Day5	WT	3	82	5	6.09756
Day5	WT	3	32	2	6.25
Day5	WT	3	34	1	2.94118
Day5	WT	3	60	2	3.33333
Day5	WT	3	58	3	5.17241
Day5	WT	3	141	12	8.51064
Day5	WT	3	59	1	1.69492
Day5	WT	3	50	1	2
Day5	WT	3	67	23	34.3284
Day5	WT	3	38	1	2.63158
Day5	WT	3	56	2	3.57143
Day5	WT	3	38	1	2.63158
Day5	WT	3	109	25	22.9358
Day5	WT	3	49	2	4.08163
Day5	WT	3	53	32	60.3774
Day5	WT	3	58	21	36.2069
Day5	WT	3	107	36	33.6449
Day5	WT	3	11	1	9.09091
Day5	WT	3	62	4	6.45161
Day5	WT	3	80	2	2.5
Day5	WT	3	57	1	1.75439
Day5	WT	3	101	3	2.9703
Day5	WT	3	71	4	5.6338
Day5	WT	3	34	16	47.0588
Day5	WT	3	70	25	35.7143
Day5	WT	3	70	10	14.2857
Day5	WT	3	69	1	1.44928
Day5	WT	3	50	7	14
Day5	WT	3	58	14	24.1379
Day5	WT	3	60	4	6.66667
Day5	WT	3	30	9	30
Day5	WT	3	53	5	9.43396
Day5	WT	3	57	1	1.75439
Day5	WT	3	68	14	20.5882
Day5	WT	3	110	85	77.2727
Day5	WT	3	225	182	80.8889
Day5	WT	3	160	4	2.5
Day5	WT	3	146	3	2.05479
Day5	WT	3	88	12	13.6364
Day5	WT	3	12	0	0
Day5	WT	3	55	19	34.5455
Day5	WT	3	52	9	17.3077
Day5	WT	3	28	3	10.7143
Day5	WT	3	51	3	5.88235
Day5	WT	3	51	6	11.7647
Day5	WT	3	28	1	3.57143
Day5	WT	3	22	1	4.54545
Day5	WT	3	42	1	2.38095
Day5	WT	3	32	1	3.125
Day5	WT	3	40	1	2.5
Day5	WT	3	36	19	52.7778
Day5	WT	3	90	67	74.4444
Day5	WT	3	49	26	53.0612
Day5	WT	3	113	66	58.4071
Day5	WT	3	63	29	46.0317
Day5	WT	4	41	12	29.2683
Day5	WT	4	37	16	43.2432
Day5	WT	4	42	18	42.8571
Day5	WT	4	103	38	36.8932
Day5	WT	4	144	63	43.75
Day5	WT	4	14	6	42.8571
Day5	WT	4	162	72	44.4444
Day5	WT	4	159	74	46.5409
Day5	WT	4	64	6	9.375
Day5	WT	4	81	0	0
Day5	WT	4	31	8	25.8065
Day5	WT	4	19	6	31.5789
Day5	WT	4	18	6	33.3333
Day5	WT	4	8	2	25
Day5	WT	4	54	3	5.55556
Day5	WT	4	45	6	13.3333
Day5	WT	4	11	4	36.3636
Day5	WT	4	49	4	8.16327
Day5	WT	4	54	8	14.8148
Day5	WT	4	58	5	8.62069
Day5	WT	4	43	17	39.5349
Day5	WT	4	103	47	45.6311
Day5	WT	4	54	20	37.037
Day5	WT	4	56	7	12.5
Day5	WT	4	18	5	27.7778
Day5	WT	4	12	7	58.3333
Day5	WT	4	34	16	47.0588
Day5	WT	5	39	9	23.0769
Day5	WT	5	31	3	9.67742
Day5	WT	5	83	36	43.3735
Day5	WT	5	48	3	6.25
Day5	WT	5	58	20	34.4828
Day5	WT	5	82	21	25.6098
Day5	WT	5	41	7	17.0732
Day5	WT	5	16	8	50
Day5	WT	5	45	12	26.6667
Day5	WT	5	24	0	0
Day5	WT	5	31	12	38.7097
Day5	WT	5	14	2	14.2857
Day5	WT	5	18	10	55.5556
Day5	WT	5	38	5	13.1579
Day5	WT	5	56	19	33.9286
Day5	WT	5	19	7	36.8421
Day5	WT	5	34	2	5.88235
Day5	WT	5	23	12	52.1739
Day5	WT	5	27	6	22.2222
Day5	WT	5	39	11	28.2051
Day5	WT	6	9	4	44.4444
Day5	WT	6	14	9	64.2857
Day5	WT	6	12	2	16.6667
Day5	WT	6	33	9	27.2727
Day5	WT	6	17	6	35.2941
Day5	WT	6	24	6	25
Day5	WT	6	19	4	21.0526
Day5	WT	6	12	2	16.6667
Day5	WT	6	14	2	14.2857
Day5	WT	6	12	6	50
Day5	WT	6	52	10	19.2308
Day5	WT	6	37	9	24.3243
Day5	WT	6	21	2	9.52381
Day5	WT	6	29	4	13.7931
Day5	WT	6	27	6	22.2222
Day5	WT	6	14	1	7.14286
Day5	WT	6	88	47	53.4091
Day5	WT	6	24	3	12.5
Day5	WT	6	5	0	0
Day5	WT	6	19	3	15.7895
Day5	WT	6	16	1	6.25
Day5	WT	6	39	4	10.2564
Day5	WT	6	46	7	15.2174
Day5	WT	6	20	1	5
Day5	WT	6	48	1	2.08333
Day5	WT	6	59	4	6.77966
Day5	WT	6	12	0	0
Day5	WT	7	34	10	29.4118
Day5	WT	7	52	28	53.8462
Day5	WT	7	26	1	3.84615
Day5	WT	7	49	21	42.8571
Day5	WT	7	46	19	41.3043
Day5	WT	7	37	8	21.6216
Day5	WT	7	91	2	2.1978
Day5	WT	7	53	22	41.5094
Day5	WT	7	38	4	10.5263
Day5	WT	7	37	26	70.2703
Day5	WT	7	23	2	8.69565
Day5	WT	7	43	7	16.2791
Day5	WT	7	24	0	0
Day5	WT	7	59	0	0
Day5	WT	7	38	0	0
Day5	WT	7	64	34	53.125
Day5	WT	7	27	0	0
Day5	WT	7	54	3	5.55556
Day5	WT	7	22	0	0
Day5	WT	7	12	0	0
Day5	WT	7	28	0	0
Day5	WT	7	25	0	0
Day5	WT	7	16	0	0
Day5	WT	7	11	4	36.3636
Day5	WT	7	36	8	22.2222
Day5	HYPO	1	61	6	9.83607
Day5	HYPO	1	54	3	5.55556
Day5	HYPO	1	43	2	4.65116
Day5	HYPO	1	40	1	2.5
Day5	HYPO	1	74	3	4.05405
Day5	HYPO	1	31	2	6.45161
Day5	HYPO	1	40	4	10
Day5	HYPO	1	41	0	0
Day5	HYPO	1	111	12	10.8108
Day5	HYPO	1	55	3	5.45455
Day5	HYPO	1	35	3	8.57143
Day5	HYPO	1	15	1	6.66667
Day5	HYPO	1	94	12	12.766
Day5	HYPO	1	143	15	10.4895
Day5	HYPO	1	47	5	10.6383
Day5	HYPO	1	69	6	8.69565
Day5	HYPO	1	56	10	17.8571
Day5	HYPO	1	37	10	27.027
Day5	HYPO	1	28	6	21.4286
Day5	HYPO	1	68	11	16.1765
Day5	HYPO	1	24	4	16.6667
Day5	HYPO	1	68	8	11.7647
Day5	HYPO	1	72	11	15.2778
Day5	HYPO	1	47	6	12.766
Day5	HYPO	1	47	5	10.6383
Day5	HYPO	1	62	7	11.2903
Day5	HYPO	1	41	8	19.5122
Day5	HYPO	1	110	21	19.0909
Day5	HYPO	1	69	23	33.3333
Day5	HYPO	1	233	57	24.4635
Day5	HYPO	1	139	18	12.9496
Day5	HYPO	1	151	37	24.5033
Day5	HYPO	1	113	13	11.5044
Day5	HYPO	1	59	16	27.1186
Day5	HYPO	1	202	40	19.802
Day5	HYPO	1	77	10	12.987
Day5	HYPO	1	71	7	9.85915
Day5	HYPO	2	335	64	19.1045
Day5	HYPO	2	37	7	18.9189
Day5	HYPO	2	307	64	20.8469
Day5	HYPO	2	134	25	18.6567
Day5	HYPO	2	91	11	12.0879
Day5	HYPO	2	58	8	13.7931
Day5	HYPO	2	29	5	17.2414
Day5	HYPO	2	372	51	13.7097
Day5	HYPO	2	93	12	12.9032
Day5	HYPO	2	100	17	17
Day5	HYPO	2	288	20	6.94444
Day5	HYPO	2	44	2	4.54545
Day5	HYPO	2	87	5	5.74713
Day5	HYPO	2	98	14	14.2857
Day5	HYPO	2	139	27	19.4245
Day5	HYPO	2	123	7	5.69106
Day5	HYPO	2	174	8	4.5977
Day5	HYPO	2	53	5	9.43396
Day5	HYPO	2	111	6	5.40541
Day5	HYPO	2	156	10	6.41026
Day5	HYPO	2	214	14	6.54206
Day5	HYPO	2	144	6	4.16667
Day5	HYPO	2	88	7	7.95455
Day5	HYPO	2	98	5	5.10204
Day5	HYPO	2	68	1	1.47059
Day5	HYPO	2	71	4	5.6338
Day5	HYPO	2	80	5	6.25
Day5	HYPO	2	35	2	5.71429
Day5	HYPO	2	126	8	6.34921
Day5	HYPO	2	71	4	5.6338
Day5	HYPO	2	100	3	3
Day5	HYPO	2	65	2	3.07692
Day5	HYPO	2	109	15	13.7615
Day5	HYPO	3	49	5	10.2041
Day5	HYPO	3	119	18	15.1261
Day5	HYPO	3	68	2	2.94118
Day5	HYPO	3	19	0	0
Day5	HYPO	3	67	6	8.95522
Day5	HYPO	3	63	20	31.746
Day5	HYPO	3	75	3	4
Day5	HYPO	3	139	20	14.3885
Day5	HYPO	3	100	17	17
Day5	HYPO	3	93	20	21.5054
Day5	HYPO	4	28	1	3.57143
Day5	HYPO	4	40	7	17.5
Day5	HYPO	4	9	0	0
Day5	HYPO	4	23	5	21.7391
Day5	HYPO	4	28	0	0
Day5	HYPO	4	54	0	0
Day5	HYPO	4	17	0	0
Day5	HYPO	4	21	3	14.2857
Day5	HYPO	4	96	1	1.04167
Day5	HYPO	4	21	0	0
Day5	HYPO	4	28	1	3.57143
Day5	HYPO	4	30	0	0
Day5	HYPO	4	16	0	0
Day5	HYPO	4	11	0	0
Day5	HYPO	4	34	3	8.82353
Day5	HYPO	4	49	0	0
Day5	HYPO	4	9	0	0
Day5	HYPO	4	53	0	0
Day5	HYPO	4	82	0	0
Day5	HYPO	4	41	0	0
Day5	HYPO	4	36	2	5.55556
Day5	HYPO	4	38	7	18.4211
Day5	HYPO	4	39	0	0
Day5	HYPO	4	64	4	6.25
Day5	HYPO	4	68	0	0
Day5	HYPO	4	55	1	1.81818
Day5	HYPO	4	14	3	21.4286
Day5	HYPO	4	36	0	0
Day5	HYPO	4	9	0	0
Day5	HYPO	4	12	1	8.33333
Day5	HYPO	4	21	0	0
Day5	HYPO	4	48	3	6.25
Day5	HYPO	4	41	0	0
Day5	HYPO	4	64	0	0
Day5	HYPO	4	62	0	0
Day5	HYPO	4	47	6	12.766
Day5	HYPO	4	44	2	4.54545
Day5	HYPO	4	46	1	2.17391
Day5	HYPO	5	12	0	0
Day5	HYPO	5	24	5	20.8333
Day5	HYPO	5	10	2	20
Day5	HYPO	5	12	0	0
Day5	HYPO	5	34	0	0
Day5	HYPO	5	44	4	9.09091
Day5	HYPO	5	30	6	20
Day5	HYPO	5	62	6	9.67742
Day5	HYPO	5	32	2	6.25
Day5	HYPO	5	30	2	6.66667
Day5	HYPO	5	28	2	7.14286
Day5	HYPO	5	14	0	0
Day5	HYPO	5	12	1	8.33333
Day5	HYPO	5	34	0	0
Day5	HYPO	5	10	0	0
Day5	HYPO	5	9	1	11.1111
Day5	HYPO	5	28	4	14.2857
Day5	HYPO	5	38	6	15.7895
Day5	HYPO	5	32	0	0
Day5	HYPO	5	12	6	50
Day5	HYPO	5	57	2	3.50877
Day5	HYPO	5	57	9	15.7895
Day5	HYPO	5	38	0	0
Day5	HYPO	5	51	6	11.7647
Day5	HYPO	5	18	0	0
Day5	HYPO	5	37	5	13.5135
Day5	HYPO	6	16	0	0
Day5	HYPO	6	11	0	0
Day5	HYPO	6	48	2	4.16667
Day5	HYPO	6	14	1	7.14286
Day5	HYPO	6	41	2	4.87805
Day5	HYPO	6	31	0	0
Day5	HYPO	6	34	0	0
Day5	HYPO	6	39	0	0
Day5	HYPO	6	51	0	0
Day5	HYPO	6	16	0	0
Day5	HYPO	6	14	0	0
Day5	HYPO	6	60	3	5
Day5	HYPO	6	20	0	0
Day5	HYPO	6	16	0	0
Day5	HYPO	6	10	0	0
Day5	HYPO	6	7	0	0
Day5	HYPO	6	21	0	0
Day5	HYPO	6	6	0	0
Day5	HYPO	6	12	1	8.33333
Day5	HYPO	6	6	0	0
Day5	HYPO	6	12	0	0
Day5	HYPO	6	6	0	0
Day5	HYPO	6	28	5	17.8571
Day5	HYPO	6	14	1	7.14286
Day5	HYPO	6	3	0	0
Day12	WT	1	82	5	6.09756
Day12	WT	1	129	10	7.75194
Day12	WT	1	112	6	5.35714
Day12	WT	1	66	3	4.54545
Day12	WT	1	91	10	10.989
Day12	WT	1	135	6	4.44444
Day12	WT	1	106	3	2.83019
Day12	WT	1	113	14	12.3894
Day12	WT	1	91	6	6.59341
Day12	WT	1	61	5	8.19672
Day12	WT	1	47	3	6.38298
Day12	WT	1	65	4	6.15385
Day12	WT	1	82	4	4.87805
Day12	WT	1	32	1	3.125
Day12	WT	1	34	1	2.94118
Day12	WT	1	60	3	5
Day12	WT	1	58	5	8.62069
Day12	WT	1	141	2	1.41844
Day12	WT	1	59	1	1.69492
Day12	WT	1	50	0	0
Day12	WT	1	51	3	5.88235
Day12	WT	1	49	7	14.2857
Day12	WT	1	27	1	3.7037
Day12	WT	1	37	1	2.7027
Day12	WT	1	53	4	7.54717
Day12	WT	1	107	6	5.60748
Day12	WT	1	48	5	10.4167
Day12	WT	1	114	5	4.38596
Day12	WT	1	126	16	12.6984
Day12	WT	1	49	1	2.04082
Day12	WT	1	43	5	11.6279
Day12	WT	1	123	8	6.50407
Day12	WT	1	121	4	3.30579
Day12	WT	1	56	1	1.78571
Day12	WT	1	70	3	4.28571
Day12	WT	1	84	2	2.38095
Day12	WT	1	144	7	4.86111
Day12	WT	1	69	4	5.7971
Day12	WT	1	48	1	2.08333
Day12	WT	1	160	6	3.75
Day12	WT	1	40	0	0
Day12	WT	1	45	1	2.22222
Day12	WT	1	116	1	0.862069
Day12	WT	1	96	4	4.16667
Day12	WT	1	99	2	2.0202
Day12	WT	1	57	0	0
Day12	WT	1	60	2	3.33333
Day12	WT	1	73	4	5.47945
Day12	WT	1	72	3	4.16667
Day12	WT	1	90	7	7.77778
Day12	WT	2	111	2	1.8018
Day12	WT	2	132	2	1.51515
Day12	WT	2	124	1	0.806452
Day12	WT	2	164	4	2.43902
Day12	WT	2	132	2	1.51515
Day12	WT	2	216	5	2.31481
Day12	WT	2	80	2	2.5
Day12	WT	2	103	0	0
Day12	WT	2	96	2	2.08333
Day12	WT	2	109	0	0
Day12	WT	2	77	2	2.5974
Day12	WT	2	100	2	2
Day12	WT	2	96	7	7.29167
Day12	WT	2	59	0	0
Day12	WT	2	52	3	5.76923
Day12	WT	2	175	2	1.14286
Day12	WT	2	47	ND	ND
Day12	WT	2	34	ND	ND
Day12	WT	2	55	ND	ND
Day12	WT	2	75	ND	ND
Day12	WT	2	69	ND	ND
Day12	WT	2	54	ND	ND
Day12	WT	2	73	ND	ND
Day12	WT	2	85	ND	ND
Day12	WT	2	44	ND	ND
Day12	WT	2	29	ND	ND
Day12	WT	2	78	ND	ND
Day12	WT	2	58	ND	ND
Day12	WT	2	53	ND	ND
Day12	WT	3	77	5	6.49351
Day12	WT	3	119	10	8.40336
Day12	WT	3	106	6	5.66038
Day12	WT	3	63	3	4.7619
Day12	WT	3	81	10	12.3457
Day12	WT	3	129	6	4.65116
Day12	WT	3	103	3	2.91262
Day12	WT	3	99	14	14.1414
Day12	WT	3	85	6	7.05882
Day12	WT	3	56	5	8.92857
Day12	WT	3	44	3	6.81818
Day12	WT	3	61	4	6.55738
Day12	WT	3	78	4	5.12821
Day12	WT	3	31	1	3.22581
Day12	WT	3	33	1	3.0303
Day12	WT	3	57	3	5.26316
Day12	WT	3	53	5	9.43396
Day12	WT	3	139	2	1.43885
Day12	WT	3	58	1	1.72414
Day12	WT	3	50	0	0
Day12	WT	3	108	2	1.85185
Day12	WT	3	29	0	0
Day12	WT	3	98	0	0
Day12	WT	3	21	0	0
Day12	WT	3	25	0	0
Day12	WT	3	47	0	0
Day12	WT	3	23	0	0
Day12	WT	3	94	0	0
Day12	WT	3	32	0	0
Day12	WT	3	67	0	0
Day12	WT	3	16	0	0
Day12	HYPO	1	94	8	8.51064
Day12	HYPO	1	62	4	6.45161
Day12	HYPO	1	59	4	6.77966
Day12	HYPO	1	62	4	6.45161
Day12	HYPO	1	43	4	9.30233
Day12	HYPO	1	86	6	6.97674
Day12	HYPO	1	100	6	6
Day12	HYPO	1	34	4	11.7647
Day12	HYPO	1	67	7	10.4478
Day12	HYPO	1	59	4	6.77966
Day12	HYPO	1	42	4	9.52381
Day12	HYPO	1	63	2	3.1746
Day12	HYPO	1	37	5	13.5135
Day12	HYPO	1	87	3	3.44828
Day12	HYPO	1	109	19	17.4312
Day12	HYPO	1	56	4	7.14286
Day12	HYPO	1	94	15	15.9574
Day12	HYPO	1	71	3	4.22535
Day12	HYPO	1	26	2	7.69231
Day12	HYPO	1	62	8	12.9032
Day12	HYPO	1	29	ND	ND
Day12	HYPO	1	19	ND	ND
Day12	HYPO	1	27	ND	ND
Day12	HYPO	1	80	ND	ND
Day12	HYPO	1	26	ND	ND
Day12	HYPO	1	91	ND	ND
Day12	HYPO	1	32	ND	ND
Day12	HYPO	1	28	ND	ND
Day12	HYPO	1	59	ND	ND
Day12	HYPO	1	112	ND	ND
Day12	HYPO	2	45	3	6.66667
Day12	HYPO	2	34	2	5.88235
Day12	HYPO	2	48	2	4.16667
Day12	HYPO	2	51	3	5.88235
Day12	HYPO	2	54	3	5.55556
Day12	HYPO	2	48	2	4.16667
Day12	HYPO	2	49	1	2.04082
Day12	HYPO	2	67	2	2.98507
Day12	HYPO	2	72	2	2.77778
Day12	HYPO	2	74	1	1.35135
Day12	HYPO	2	51	2	3.92157
Day12	HYPO	2	27	1	3.7037
Day12	HYPO	2	34	2	5.88235
Day12	HYPO	2	30	0	0
Day12	HYPO	2	40	0	0
Day12	HYPO	2	87	3	3.44828
Day12	HYPO	2	65	2	3.07692
Day12	HYPO	2	84	2	2.38095
Day12	HYPO	2	95	1	1.05263
Day12	HYPO	2	56	1	1.78571
Day12	HYPO	2	111	4	3.6036
Day12	HYPO	2	29	1	3.44828
Day12	HYPO	2	44	1	2.27273
Day12	HYPO	2	98	0	0
Day12	HYPO	2	120	6	5
Day12	HYPO	2	41	0	0
Day12	HYPO	2	71	1	1.40845
Day12	HYPO	2	59	1	1.69492
Day12	HYPO	2	29	2	6.89655
Day12	HYPO	2	56	1	1.78571
Day12	HYPO	2	55	1	1.81818
Day12	HYPO	2	70	3	4.28571
Day12	HYPO	2	42	2	4.7619
Day12	HYPO	2	37	1	2.7027
Day12	HYPO	2	67	2	2.98507
Day12	HYPO	2	48	1	2.08333
Day12	HYPO	2	29	0	0
Day12	HYPO	2	68	1	1.47059
Day12	HYPO	2	45	5	11.1111
Day12	HYPO	2	46	0	0
Day12	HYPO	2	113	8	7.07965
Day12	HYPO	2	27	0	0
Day12	HYPO	2	33	0	0
Day12	HYPO	2	100	4	4
Day12	HYPO	2	34	1	2.94118
Day12	HYPO	2	68	1	1.47059
Day12	HYPO	2	42	1	2.38095
Day12	HYPO	2	26	0	0
Day12	HYPO	2	56	1	1.78571
Day12	HYPO	2	79	2	2.53165
Day12	HYPO	2	36	1	2.77778
Day12	HYPO	2	63	0	0
Day12	HYPO	2	71	0	0
Day12	HYPO	2	73	0	0
Day12	HYPO	2	108	3	2.77778
Day12	HYPO	2	108	4	3.7037
Day12	HYPO	2	126	2	1.5873
Day12	HYPO	2	76	0	0
Day12	HYPO	2	42	0	0
Day12	HYPO	2	87	0	0
Day12	HYPO	2	67	1	1.49254
Day12	HYPO	3	22	4	18.1818
Day12	HYPO	3	18	0	0
Day12	HYPO	3	66	0	0
Day12	HYPO	3	8	0	0
Day12	HYPO	3	24	1	4.16667
Day12	HYPO	3	27	0	0
Day12	HYPO	3	120	0	0
Day12	HYPO	3	167	2	1.1976
Day12	HYPO	3	64	0	0
Day12	HYPO	3	35	7	20
Day12	HYPO	3	10	1	0.1
Day12	HYPO	3	21	0	0
Day12	HYPO	3	16	0	0
Day12	HYPO	3	7	0	0
Day12	HYPO	3	9	0	0
Day12	HYPO	3	26	0	0
Day12	HYPO	3	74	3	4.05405
Day12	HYPO	3	41	1	2.43902
Day12	HYPO	3	31	2	6.45161
Day12	HYPO	3	15	1	6.66667
Day12	HYPO	3	14	0	0
Day12	HYPO	3	34	5	14.7059
Day12	HYPO	3	32	0	0
Day12	HYPO	3	36	0	0
Day12	HYPO	3	25	0	0
Day12	HYPO	4	53	1	1.88679
Day12	HYPO	4	10	0	0
Day12	HYPO	4	56	1	1.78571
Day12	HYPO	4	64	1	1.5625
Day12	HYPO	4	36	0	0
Day12	HYPO	4	47	0	0
Day12	HYPO	4	23	0	0
Day12	HYPO	4	16	0	0
Day12	HYPO	4	20	1	5
Day12	HYPO	4	20	0	0
Day12	HYPO	4	18	0	0
Day12	HYPO	4	22	0	0
Day12	HYPO	4	9	0	0
Day12	HYPO	4	27	0	0
Day12	HYPO	4	5	0	0
Day12	HYPO	4	24	0	0
Day12	HYPO	4	29	1	3.44828
Day12	HYPO	4	14	0	0
Day12	HYPO	4	23	1	4.34783
Day12	HYPO	4	21	1	4.7619
Day12	HYPO	4	25	0	0
Day12	HYPO	4	24	1	4.16667
Day12	HYPO	4	33	0	0
Day12	HYPO	4	26	0	0
Day12	HYPO	4	44	0	0
Day12	HYPO	4	24	0	0
Day12	HYPO	4	39	1	2.5641
Day12	HYPO	4	10	0	0
Day12	HYPO	4	16	0	0
Day12	HYPO	4	19	0	0
Day12	HYPO	4	4	0	0
Day12	HYPO	4	19	0	0
Day12	HYPO	4	11	0	0
Day12	HYPO	4	12	0	0
Day12	HYPO	4	4	0	0
Day12	HYPO	4	18	0	0
Day12	HYPO	4	15	0	0
Figure 7D-E PSR+ area of WT and Tet1hypo mice at before or after chronic DDC damage. Different mice are indicated.
Genotype	MouseID	Timepoint	PSR Area (um2)
HYPO	1	Recovery	147052
HYPO	1	Recovery	102175
HYPO	1	Recovery	117136
HYPO	1	Recovery	157199
HYPO	1	Recovery	208648
HYPO	1	Recovery	144109
HYPO	1	Recovery	157852
HYPO	1	Recovery	217798
HYPO	1	Recovery	153382
HYPO	1	Recovery	288271
HYPO	1	Recovery	218412
HYPO	1	Recovery	136766
HYPO	1	Recovery	236123
HYPO	1	Recovery	199774
HYPO	1	Recovery	142973
HYPO	1	Recovery	197532
HYPO	1	Recovery	264160
HYPO	1	Recovery	175125
HYPO	1	Recovery	224980
HYPO	1	Recovery	125792
HYPO	1	Recovery	170880
HYPO	2	Recovery	280655
HYPO	2	Recovery	294928
HYPO	2	Recovery	223235
HYPO	2	Recovery	182186
HYPO	2	Recovery	143046
HYPO	2	Recovery	155075
HYPO	2	Recovery	108411
HYPO	2	Recovery	48321.8
HYPO	2	Recovery	118614
HYPO	2	Recovery	57255.6
HYPO	2	Recovery	132899
HYPO	2	Recovery	97381.3
HYPO	2	Recovery	48741.4
HYPO	2	Recovery	48512.8
HYPO	2	Recovery	92782.1
HYPO	2	Recovery	45216.8
HYPO	2	Recovery	107458
HYPO	2	Recovery	118456
HYPO	2	Recovery	153447
HYPO	2	Recovery	235426
HYPO	2	Recovery	173070
HYPO	2	Recovery	172262
HYPO	2	Recovery	198609
HYPO	2	Recovery	177171
HYPO	2	Recovery	80199.5
HYPO	2	Recovery	212280
HYPO	2	Recovery	378339
HYPO	2	Recovery	260861
HYPO	3	Recovery	181290
HYPO	3	Recovery	149010
HYPO	3	Recovery	203773
HYPO	3	Recovery	128394
HYPO	3	Recovery	67546
HYPO	3	Recovery	121709
HYPO	3	Recovery	88847
HYPO	3	Recovery	58952
HYPO	3	Recovery	53865
HYPO	3	Recovery	122485
HYPO	3	Recovery	147925
HYPO	3	Recovery	112831
WT	1	Recovery	134872
WT	1	Recovery	136917
WT	1	Recovery	103834
WT	1	Recovery	87964.7
WT	1	Recovery	64566.9
WT	1	Recovery	118529
WT	1	Recovery	103377
WT	1	Recovery	100745
WT	1	Recovery	60819.4
WT	1	Recovery	81396.5
WT	1	Recovery	143427
WT	1	Recovery	249894
WT	1	Recovery	247189
WT	1	Recovery	119750
WT	1	Recovery	254643
WT	1	Recovery	184438
WT	1	Recovery	233341
WT	1	Recovery	179231
WT	1	Recovery	424238
WT	1	Recovery	476666
WT	2	Recovery	72707.1
WT	2	Recovery	87714.5
WT	2	Recovery	223298
WT	2	Recovery	159934
WT	2	Recovery	53669.9
WT	2	Recovery	60979.7
WT	2	Recovery	66694.8
WT	2	Recovery	89067.5
WT	2	Recovery	53579.6
WT	2	Recovery	9817.35
WT	2	Recovery	165333
WT	2	Recovery	141911
WT	2	Recovery	75086.6
WT	2	Recovery	104425
WT	2	Recovery	57027
WT	2	Recovery	9487.09
WT	2	Recovery	98372
WT	2	Recovery	70287.1
WT	2	Recovery	83100.3
WT	2	Recovery	27240
WT	2	Recovery	72996
WT	2	Recovery	72438
WT	2	Recovery	59757.5
WT	2	Recovery	58679.2
WT	3	Recovery	62872
WT	3	Recovery	35317
WT	3	Recovery	23510
WT	3	Recovery	105933
WT	3	Recovery	12645
WT	3	Recovery	30971
WT	3	Recovery	7330
WT	3	Recovery	11826
WT	3	Recovery	4815
WT	3	Recovery	7867
WT	3	Recovery	1840
WT	3	Recovery	24316
HYPO	1	Undamaged	8616
HYPO	1	Undamaged	33991
HYPO	1	Undamaged	4851
HYPO	1	Undamaged	4009
HYPO	1	Undamaged	24846
HYPO	1	Undamaged	25949
HYPO	1	Undamaged	17629
HYPO	1	Undamaged	38826
HYPO	1	Undamaged	32730
HYPO	1	Undamaged	30115
HYPO	1	Undamaged	23581
HYPO	1	Undamaged	26303
HYPO	2	Undamaged	114861
HYPO	2	Undamaged	133469
HYPO	2	Undamaged	237181
HYPO	2	Undamaged	90907.6
HYPO	2	Undamaged	151940
HYPO	2	Undamaged	108228
HYPO	2	Undamaged	112284
HYPO	2	Undamaged	236457
HYPO	2	Undamaged	101939
HYPO	2	Undamaged	74771
HYPO	2	Undamaged	108566
HYPO	2	Undamaged	9715.17
HYPO	2	Undamaged	12391.3
HYPO	2	Undamaged	1330.64
HYPO	2	Undamaged	3279.84
HYPO	2	Undamaged	2169.2
HYPO	3	Undamaged	37441.8
HYPO	3	Undamaged	101922
HYPO	3	Undamaged	23632.7
HYPO	3	Undamaged	30834.3
HYPO	3	Undamaged	25057.9
HYPO	3	Undamaged	102336
HYPO	3	Undamaged	155618
HYPO	3	Undamaged	51558.1
HYPO	3	Undamaged	32312.7
HYPO	3	Undamaged	49772.6
HYPO	3	Undamaged	22690
HYPO	3	Undamaged	50318.8
HYPO	3	Undamaged	30816.2
HYPO	3	Undamaged	44163
HYPO	3	Undamaged	80078.6
HYPO	3	Undamaged	94163
HYPO	3	Undamaged	60263.6
WT	1	Undamaged	52398
WT	1	Undamaged	9182
WT	1	Undamaged	8943
WT	1	Undamaged	34091
WT	1	Undamaged	2663
WT	1	Undamaged	2384
WT	1	Undamaged	4795
WT	1	Undamaged	9585
WT	1	Undamaged	30540
WT	1	Undamaged	60054
WT	2	Undamaged	17353.6
WT	2	Undamaged	15851.8
WT	2	Undamaged	29127.4
WT	2	Undamaged	21220.1
WT	2	Undamaged	132586
WT	2	Undamaged	145792
WT	2	Undamaged	93513.7
WT	2	Undamaged	119271
WT	2	Undamaged	142337
WT	2	Undamaged	863.004
WT	3	Undamaged	32699.5
WT	3	Undamaged	36663.8
WT	3	Undamaged	134989
WT	3	Undamaged	265078
WT	3	Undamaged	129744
WT	3	Undamaged	37989.2
WT	3	Undamaged	68844.7
WT	3	Undamaged	29276.2
WT	3	Undamaged	19197.6
WT	3	Undamaged	50861.9
WT	3	Undamaged	26167.5
WT	3	Undamaged	212476
WT	3	Undamaged	69114.7
