# Supplementary material for: Epigenetic remodelling licences adult cholangiocytes for organoid formation and liver regeneration
Source: Springer Nature journal article supplement (doi:10.1038/s41556-019-0402-6), 2019-11-01
Supplement: MOESM17 [file 41556_2019_402_MOESM17_ESM.xlsx]

## Sheet: Figure 8
Figure 8
Figure 8c Number of OPN+ Cells per FOV after ductal specific knock out of Tet1 and p21/DDC induced damage
MouseID	Genotype	OPN+/FOV
1	Prom1Tet1WT	215
1	Prom1Tet1WT	125
1	Prom1Tet1WT	154
1	Prom1Tet1WT	150
1	Prom1Tet1WT	138
1	Prom1Tet1WT	137
1	Prom1Tet1WT	126
1	Prom1Tet1WT	182
1	Prom1Tet1WT	300
1	Prom1Tet1WT	192
1	Prom1Tet1WT	230
1	Prom1Tet1WT	180
1	Prom1Tet1WT	159
1	Prom1Tet1WT	129
1	Prom1Tet1WT	171
2	Prom1Tet1WT	186
2	Prom1Tet1WT	116
2	Prom1Tet1WT	159
2	Prom1Tet1WT	187
2	Prom1Tet1WT	115
2	Prom1Tet1WT	153
2	Prom1Tet1WT	225
2	Prom1Tet1WT	128
2	Prom1Tet1WT	123
2	Prom1Tet1WT	178
2	Prom1Tet1WT	131
2	Prom1Tet1WT	67
2	Prom1Tet1WT	101
2	Prom1Tet1WT	73
2	Prom1Tet1WT	112
3	Prom1Tet1WT	183
3	Prom1Tet1WT	161
3	Prom1Tet1WT	99
3	Prom1Tet1WT	128
3	Prom1Tet1WT	77
3	Prom1Tet1WT	142
3	Prom1Tet1WT	125
3	Prom1Tet1WT	63
3	Prom1Tet1WT	113
3	Prom1Tet1WT	122
3	Prom1Tet1WT	135
3	Prom1Tet1WT	98
3	Prom1Tet1WT	152
3	Prom1Tet1WT	140
3	Prom1Tet1WT	206
3	Prom1Tet1WT	136
4	Prom1Tet1WT	160
4	Prom1Tet1WT	164
4	Prom1Tet1WT	136
4	Prom1Tet1WT	133
4	Prom1Tet1WT	170
4	Prom1Tet1WT	163
4	Prom1Tet1WT	228
4	Prom1Tet1WT	195
4	Prom1Tet1WT	189
4	Prom1Tet1WT	272
4	Prom1Tet1WT	269
4	Prom1Tet1WT	260
5	Prom1Tet1WT	112
5	Prom1Tet1WT	179
5	Prom1Tet1WT	153
5	Prom1Tet1WT	134
5	Prom1Tet1WT	117
5	Prom1Tet1WT	116
5	Prom1Tet1WT	133
5	Prom1Tet1WT	96
5	Prom1Tet1WT	113
5	Prom1Tet1WT	92
5	Prom1Tet1WT	88
5	Prom1Tet1WT	113
5	Prom1Tet1WT	181
5	Prom1Tet1WT	145
5	Prom1Tet1WT	96
5	Prom1Tet1WT	165
6	Prom1Tet1WT	124
6	Prom1Tet1WT	62
6	Prom1Tet1WT	132
6	Prom1Tet1WT	70
6	Prom1Tet1WT	126
6	Prom1Tet1WT	47
6	Prom1Tet1WT	60
6	Prom1Tet1WT	183
6	Prom1Tet1WT	109
6	Prom1Tet1WT	141
6	Prom1Tet1WT	153
6	Prom1Tet1WT	100
6	Prom1Tet1WT	81
6	Prom1Tet1WT	95
6	Prom1Tet1WT	131
7	Prom1Tet1WT	138
7	Prom1Tet1WT	193
7	Prom1Tet1WT	275
7	Prom1Tet1WT	206
7	Prom1Tet1WT	160
7	Prom1Tet1WT	110
7	Prom1Tet1WT	209
7	Prom1Tet1WT	172
7	Prom1Tet1WT	214
7	Prom1Tet1WT	206
7	Prom1Tet1WT	224
7	Prom1Tet1WT	125
7	Prom1Tet1WT	164
7	Prom1Tet1WT	318
7	Prom1Tet1WT	283
7	Prom1Tet1WT	261
7	Prom1Tet1WT	190
8	Prom1Tet1WT	123
8	Prom1Tet1WT	144
8	Prom1Tet1WT	189
8	Prom1Tet1WT	189
8	Prom1Tet1WT	222
8	Prom1Tet1WT	158
8	Prom1Tet1WT	131
8	Prom1Tet1WT	180
8	Prom1Tet1WT	150
8	Prom1Tet1WT	186
8	Prom1Tet1WT	123
8	Prom1Tet1WT	176
8	Prom1Tet1WT	160
8	Prom1Tet1WT	78
8	Prom1Tet1WT	154
8	Prom1Tet1WT	159
8	Prom1Tet1WT	168
9	Prom1Tet1WT	189
9	Prom1Tet1WT	86
9	Prom1Tet1WT	184
9	Prom1Tet1WT	162
9	Prom1Tet1WT	86
9	Prom1Tet1WT	127
9	Prom1Tet1WT	104
9	Prom1Tet1WT	162
9	Prom1Tet1WT	113
9	Prom1Tet1WT	76
9	Prom1Tet1WT	130
9	Prom1Tet1WT	178
9	Prom1Tet1WT	146
9	Prom1Tet1WT	92
9	Prom1Tet1WT	99
9	Prom1Tet1WT	134
9	Prom1Tet1WT	152
1	Prom1ΔTet1	108
1	Prom1ΔTet1	52
1	Prom1ΔTet1	120
1	Prom1ΔTet1	160
1	Prom1ΔTet1	93
1	Prom1ΔTet1	35
1	Prom1ΔTet1	50
1	Prom1ΔTet1	191
1	Prom1ΔTet1	78
1	Prom1ΔTet1	150
1	Prom1ΔTet1	91
2	Prom1ΔTet1	110
2	Prom1ΔTet1	39
2	Prom1ΔTet1	61
2	Prom1ΔTet1	101
2	Prom1ΔTet1	86
2	Prom1ΔTet1	88
2	Prom1ΔTet1	92
2	Prom1ΔTet1	103
2	Prom1ΔTet1	96
2	Prom1ΔTet1	110
2	Prom1ΔTet1	196
3	Prom1ΔTet1	53
3	Prom1ΔTet1	151
3	Prom1ΔTet1	115
3	Prom1ΔTet1	131
3	Prom1ΔTet1	90
3	Prom1ΔTet1	106
3	Prom1ΔTet1	104
3	Prom1ΔTet1	117
3	Prom1ΔTet1	74
3	Prom1ΔTet1	70
3	Prom1ΔTet1	105
4	Prom1ΔTet1	62
4	Prom1ΔTet1	102
4	Prom1ΔTet1	77
4	Prom1ΔTet1	90
4	Prom1ΔTet1	104
4	Prom1ΔTet1	104
4	Prom1ΔTet1	59
4	Prom1ΔTet1	96
4	Prom1ΔTet1	97
4	Prom1ΔTet1	92
4	Prom1ΔTet1	102
5	Prom1ΔTet1	80
5	Prom1ΔTet1	136
5	Prom1ΔTet1	70
5	Prom1ΔTet1	121
5	Prom1ΔTet1	65
5	Prom1ΔTet1	73
5	Prom1ΔTet1	117
5	Prom1ΔTet1	69
5	Prom1ΔTet1	91
5	Prom1ΔTet1	70
5	Prom1ΔTet1	67
5	Prom1ΔTet1	76
5	Prom1ΔTet1	99
5	Prom1ΔTet1	59
5	Prom1ΔTet1	113
5	Prom1ΔTet1	163
5	Prom1ΔTet1	138
6	Prom1ΔTet1	69
6	Prom1ΔTet1	38
6	Prom1ΔTet1	28
6	Prom1ΔTet1	85
6	Prom1ΔTet1	64
6	Prom1ΔTet1	74
6	Prom1ΔTet1	56
6	Prom1ΔTet1	65
6	Prom1ΔTet1	47
6	Prom1ΔTet1	47
6	Prom1ΔTet1	48
6	Prom1ΔTet1	80
6	Prom1ΔTet1	43
6	Prom1ΔTet1	72
6	Prom1ΔTet1	37
6	Prom1ΔTet1	64
7	Prom1ΔTet1	205
7	Prom1ΔTet1	174
7	Prom1ΔTet1	82
7	Prom1ΔTet1	134
7	Prom1ΔTet1	134
7	Prom1ΔTet1	170
7	Prom1ΔTet1	172
7	Prom1ΔTet1	219
7	Prom1ΔTet1	206
7	Prom1ΔTet1	189
7	Prom1ΔTet1	136
7	Prom1ΔTet1	207
7	Prom1ΔTet1	174
7	Prom1ΔTet1	151
7	Prom1ΔTet1	129
8	Prom1ΔTet1	129
8	Prom1ΔTet1	317
8	Prom1ΔTet1	291
8	Prom1ΔTet1	264
8	Prom1ΔTet1	146
8	Prom1ΔTet1	129
8	Prom1ΔTet1	255
8	Prom1ΔTet1	271
8	Prom1ΔTet1	153
8	Prom1ΔTet1	130
8	Prom1ΔTet1	192
8	Prom1ΔTet1	248
8	Prom1ΔTet1	234
8	Prom1ΔTet1	314
8	Prom1ΔTet1	279
8	Prom1ΔTet1	233
8	Prom1ΔTet1	248
8	Prom1ΔTet1	306
9	Prom1ΔTet1	164
9	Prom1ΔTet1	79
9	Prom1ΔTet1	122
9	Prom1ΔTet1	105
9	Prom1ΔTet1	57
9	Prom1ΔTet1	143
9	Prom1ΔTet1	116
9	Prom1ΔTet1	46
9	Prom1ΔTet1	52
9	Prom1ΔTet1	37
9	Prom1ΔTet1	131
9	Prom1ΔTet1	76
9	Prom1ΔTet1	176
9	Prom1ΔTet1	112
9	Prom1ΔTet1	167
9	Prom1ΔTet1	103
9	Prom1ΔTet1	109
Figure 8e Ductal-derived hepatocyte cluster size analysis after ductal specific knock out of Tet1 and p21/DDC damage
MouseID	Genotype	Cluster size
1	Prom1Tet1WT	9
1	Prom1Tet1WT	17
1	Prom1Tet1WT	2
1	Prom1Tet1WT	2
1	Prom1Tet1WT	22
1	Prom1Tet1WT	10
1	Prom1Tet1WT	3
1	Prom1Tet1WT	11
1	Prom1Tet1WT	1
1	Prom1Tet1WT	1
1	Prom1Tet1WT	66
1	Prom1Tet1WT	13
1	Prom1Tet1WT	2
1	Prom1Tet1WT	33
1	Prom1Tet1WT	1
1	Prom1Tet1WT	23
1	Prom1Tet1WT	2
1	Prom1Tet1WT	2
1	Prom1Tet1WT	27
1	Prom1Tet1WT	42
1	Prom1Tet1WT	4
1	Prom1Tet1WT	44
1	Prom1Tet1WT	20
1	Prom1Tet1WT	2
1	Prom1Tet1WT	95
1	Prom1Tet1WT	1
1	Prom1Tet1WT	59
1	Prom1Tet1WT	42
1	Prom1Tet1WT	5
1	Prom1Tet1WT	13
1	Prom1Tet1WT	1
1	Prom1Tet1WT	20
1	Prom1Tet1WT	18
1	Prom1Tet1WT	108
1	Prom1Tet1WT	15
1	Prom1Tet1WT	1
1	Prom1Tet1WT	33
1	Prom1Tet1WT	5
1	Prom1Tet1WT	15
1	Prom1Tet1WT	2
1	Prom1Tet1WT	2
1	Prom1Tet1WT	53
1	Prom1Tet1WT	6
1	Prom1Tet1WT	1
1	Prom1Tet1WT	3
1	Prom1Tet1WT	2
1	Prom1Tet1WT	1
1	Prom1Tet1WT	14
1	Prom1Tet1WT	2
1	Prom1Tet1WT	18
1	Prom1Tet1WT	2
1	Prom1Tet1WT	2
1	Prom1Tet1WT	49
1	Prom1Tet1WT	35
1	Prom1Tet1WT	57
1	Prom1Tet1WT	20
1	Prom1Tet1WT	10
1	Prom1Tet1WT	1
1	Prom1Tet1WT	20
1	Prom1Tet1WT	1
1	Prom1Tet1WT	56
1	Prom1Tet1WT	3
1	Prom1Tet1WT	1
1	Prom1Tet1WT	67
1	Prom1Tet1WT	3
1	Prom1Tet1WT	46
1	Prom1Tet1WT	5
1	Prom1Tet1WT	1
1	Prom1Tet1WT	68
1	Prom1Tet1WT	48
1	Prom1Tet1WT	5
1	Prom1Tet1WT	2
1	Prom1Tet1WT	45
1	Prom1Tet1WT	6
1	Prom1Tet1WT	3
1	Prom1Tet1WT	10
1	Prom1Tet1WT	24
1	Prom1Tet1WT	1
1	Prom1Tet1WT	7
1	Prom1Tet1WT	1
1	Prom1Tet1WT	65
1	Prom1Tet1WT	30
1	Prom1Tet1WT	6
1	Prom1Tet1WT	57
1	Prom1Tet1WT	77
1	Prom1Tet1WT	20
1	Prom1Tet1WT	24
1	Prom1Tet1WT	21
1	Prom1Tet1WT	47
1	Prom1Tet1WT	1
1	Prom1Tet1WT	59
1	Prom1Tet1WT	32
1	Prom1Tet1WT	105
1	Prom1Tet1WT	6
1	Prom1Tet1WT	34
1	Prom1Tet1WT	6
1	Prom1Tet1WT	14
1	Prom1Tet1WT	6
1	Prom1Tet1WT	22
1	Prom1Tet1WT	3
1	Prom1Tet1WT	51
1	Prom1Tet1WT	32
1	Prom1Tet1WT	19
1	Prom1Tet1WT	17
1	Prom1Tet1WT	2
1	Prom1Tet1WT	2
1	Prom1Tet1WT	5
1	Prom1Tet1WT	2
1	Prom1Tet1WT	97
1	Prom1Tet1WT	24
1	Prom1Tet1WT	12
1	Prom1Tet1WT	34
1	Prom1Tet1WT	22
1	Prom1Tet1WT	10
1	Prom1Tet1WT	2
1	Prom1Tet1WT	9
1	Prom1Tet1WT	2
1	Prom1Tet1WT	32
1	Prom1Tet1WT	65
1	Prom1Tet1WT	53
1	Prom1Tet1WT	9
1	Prom1Tet1WT	1
1	Prom1Tet1WT	107
1	Prom1Tet1WT	2
1	Prom1Tet1WT	9
1	Prom1Tet1WT	134
1	Prom1Tet1WT	48
1	Prom1Tet1WT	1
1	Prom1Tet1WT	42
1	Prom1Tet1WT	2
1	Prom1Tet1WT	1
1	Prom1Tet1WT	6
1	Prom1Tet1WT	2
1	Prom1Tet1WT	2
1	Prom1Tet1WT	2
1	Prom1Tet1WT	7
1	Prom1Tet1WT	53
1	Prom1Tet1WT	2
1	Prom1Tet1WT	27
1	Prom1Tet1WT	1
1	Prom1Tet1WT	10
1	Prom1Tet1WT	39
1	Prom1Tet1WT	16
1	Prom1Tet1WT	6
1	Prom1Tet1WT	70
1	Prom1Tet1WT	53
1	Prom1Tet1WT	74
1	Prom1Tet1WT	32
1	Prom1Tet1WT	10
1	Prom1Tet1WT	2
1	Prom1Tet1WT	1
1	Prom1Tet1WT	16
1	Prom1Tet1WT	15
1	Prom1Tet1WT	6
1	Prom1Tet1WT	37
1	Prom1Tet1WT	1
1	Prom1Tet1WT	15
1	Prom1Tet1WT	2
1	Prom1Tet1WT	3
1	Prom1Tet1WT	2
1	Prom1Tet1WT	2
1	Prom1Tet1WT	1
1	Prom1Tet1WT	1
1	Prom1Tet1WT	1
1	Prom1Tet1WT	2
1	Prom1Tet1WT	2
1	Prom1Tet1WT	45
1	Prom1Tet1WT	28
1	Prom1Tet1WT	5
1	Prom1Tet1WT	4
1	Prom1Tet1WT	36
1	Prom1Tet1WT	11
1	Prom1Tet1WT	10
1	Prom1Tet1WT	4
1	Prom1Tet1WT	2
1	Prom1Tet1WT	1
1	Prom1Tet1WT	1
1	Prom1Tet1WT	40
1	Prom1Tet1WT	2
1	Prom1Tet1WT	112
1	Prom1Tet1WT	90
1	Prom1Tet1WT	43
1	Prom1Tet1WT	4
1	Prom1Tet1WT	17
1	Prom1Tet1WT	13
1	Prom1Tet1WT	3
1	Prom1Tet1WT	17
1	Prom1Tet1WT	14
1	Prom1Tet1WT	33
1	Prom1Tet1WT	1
1	Prom1Tet1WT	7
1	Prom1Tet1WT	92
1	Prom1Tet1WT	45
1	Prom1Tet1WT	12
1	Prom1Tet1WT	40
1	Prom1Tet1WT	20
1	Prom1Tet1WT	135
1	Prom1Tet1WT	2
1	Prom1Tet1WT	39
1	Prom1Tet1WT	1
1	Prom1Tet1WT	131
1	Prom1Tet1WT	159
1	Prom1Tet1WT	16
1	Prom1Tet1WT	58
1	Prom1Tet1WT	3
1	Prom1Tet1WT	34
1	Prom1Tet1WT	11
1	Prom1Tet1WT	46
1	Prom1Tet1WT	19
1	Prom1Tet1WT	110
1	Prom1Tet1WT	8
1	Prom1Tet1WT	18
1	Prom1Tet1WT	69
1	Prom1Tet1WT	4
1	Prom1Tet1WT	3
1	Prom1Tet1WT	1
1	Prom1Tet1WT	45
1	Prom1Tet1WT	32
1	Prom1Tet1WT	27
1	Prom1Tet1WT	121
1	Prom1Tet1WT	29
1	Prom1Tet1WT	75
1	Prom1Tet1WT	55
1	Prom1Tet1WT	1
1	Prom1Tet1WT	1
1	Prom1Tet1WT	90
1	Prom1Tet1WT	27
1	Prom1Tet1WT	52
1	Prom1Tet1WT	14
1	Prom1Tet1WT	8
1	Prom1Tet1WT	37
1	Prom1Tet1WT	4
1	Prom1Tet1WT	41
1	Prom1Tet1WT	7
1	Prom1Tet1WT	80
1	Prom1Tet1WT	7
1	Prom1Tet1WT	12
1	Prom1Tet1WT	6
1	Prom1Tet1WT	6
1	Prom1Tet1WT	2
1	Prom1Tet1WT	14
1	Prom1Tet1WT	20
1	Prom1Tet1WT	1
2	Prom1Tet1WT	14
2	Prom1Tet1WT	157
2	Prom1Tet1WT	14
2	Prom1Tet1WT	2
2	Prom1Tet1WT	4
2	Prom1Tet1WT	29
2	Prom1Tet1WT	134
2	Prom1Tet1WT	7
2	Prom1Tet1WT	14
2	Prom1Tet1WT	10
2	Prom1Tet1WT	18
2	Prom1Tet1WT	17
2	Prom1Tet1WT	2
2	Prom1Tet1WT	13
2	Prom1Tet1WT	17
2	Prom1Tet1WT	10
2	Prom1Tet1WT	1
2	Prom1Tet1WT	3
2	Prom1Tet1WT	1
2	Prom1Tet1WT	8
2	Prom1Tet1WT	15
2	Prom1Tet1WT	1
2	Prom1Tet1WT	4
2	Prom1Tet1WT	2
2	Prom1Tet1WT	5
2	Prom1Tet1WT	3
2	Prom1Tet1WT	1
2	Prom1Tet1WT	42
2	Prom1Tet1WT	17
2	Prom1Tet1WT	18
2	Prom1Tet1WT	6
2	Prom1Tet1WT	26
2	Prom1Tet1WT	3
2	Prom1Tet1WT	2
2	Prom1Tet1WT	2
2	Prom1Tet1WT	4
2	Prom1Tet1WT	3
2	Prom1Tet1WT	2
2	Prom1Tet1WT	13
2	Prom1Tet1WT	1
2	Prom1Tet1WT	1
2	Prom1Tet1WT	17
2	Prom1Tet1WT	4
2	Prom1Tet1WT	39
2	Prom1Tet1WT	17
2	Prom1Tet1WT	2
2	Prom1Tet1WT	2
2	Prom1Tet1WT	33
2	Prom1Tet1WT	11
2	Prom1Tet1WT	2
2	Prom1Tet1WT	18
2	Prom1Tet1WT	9
2	Prom1Tet1WT	2
2	Prom1Tet1WT	9
2	Prom1Tet1WT	5
2	Prom1Tet1WT	1
2	Prom1Tet1WT	3
2	Prom1Tet1WT	7
2	Prom1Tet1WT	14
2	Prom1Tet1WT	27
2	Prom1Tet1WT	21
2	Prom1Tet1WT	19
2	Prom1Tet1WT	2
2	Prom1Tet1WT	1
2	Prom1Tet1WT	28
2	Prom1Tet1WT	2
2	Prom1Tet1WT	1
2	Prom1Tet1WT	9
2	Prom1Tet1WT	2
2	Prom1Tet1WT	1
2	Prom1Tet1WT	1
2	Prom1Tet1WT	1
2	Prom1Tet1WT	11
2	Prom1Tet1WT	7
2	Prom1Tet1WT	5
2	Prom1Tet1WT	1
2	Prom1Tet1WT	1
2	Prom1Tet1WT	18
2	Prom1Tet1WT	22
2	Prom1Tet1WT	2
2	Prom1Tet1WT	2
2	Prom1Tet1WT	13
2	Prom1Tet1WT	1
2	Prom1Tet1WT	1
2	Prom1Tet1WT	2
2	Prom1Tet1WT	2
2	Prom1Tet1WT	2
2	Prom1Tet1WT	9
2	Prom1Tet1WT	25
2	Prom1Tet1WT	13
2	Prom1Tet1WT	4
2	Prom1Tet1WT	1
2	Prom1Tet1WT	28
2	Prom1Tet1WT	2
2	Prom1Tet1WT	18
2	Prom1Tet1WT	2
2	Prom1Tet1WT	1
2	Prom1Tet1WT	1
2	Prom1Tet1WT	11
2	Prom1Tet1WT	5
2	Prom1Tet1WT	2
2	Prom1Tet1WT	7
2	Prom1Tet1WT	2
2	Prom1Tet1WT	20
2	Prom1Tet1WT	9
2	Prom1Tet1WT	7
2	Prom1Tet1WT	2
2	Prom1Tet1WT	19
2	Prom1Tet1WT	103
2	Prom1Tet1WT	5
2	Prom1Tet1WT	1
2	Prom1Tet1WT	15
2	Prom1Tet1WT	2
2	Prom1Tet1WT	8
2	Prom1Tet1WT	2
2	Prom1Tet1WT	1
2	Prom1Tet1WT	2
2	Prom1Tet1WT	2
3	Prom1Tet1WT	10
3	Prom1Tet1WT	3
3	Prom1Tet1WT	3
3	Prom1Tet1WT	2
3	Prom1Tet1WT	5
3	Prom1Tet1WT	3
3	Prom1Tet1WT	7
3	Prom1Tet1WT	2
3	Prom1Tet1WT	9
3	Prom1Tet1WT	3
3	Prom1Tet1WT	2
3	Prom1Tet1WT	5
3	Prom1Tet1WT	1
3	Prom1Tet1WT	4
3	Prom1Tet1WT	6
3	Prom1Tet1WT	4
3	Prom1Tet1WT	2
3	Prom1Tet1WT	1
3	Prom1Tet1WT	6
3	Prom1Tet1WT	2
3	Prom1Tet1WT	4
3	Prom1Tet1WT	2
3	Prom1Tet1WT	5
3	Prom1Tet1WT	3
3	Prom1Tet1WT	4
3	Prom1Tet1WT	3
3	Prom1Tet1WT	25
3	Prom1Tet1WT	3
3	Prom1Tet1WT	6
3	Prom1Tet1WT	3
3	Prom1Tet1WT	6
3	Prom1Tet1WT	8
3	Prom1Tet1WT	2
3	Prom1Tet1WT	5
3	Prom1Tet1WT	3
3	Prom1Tet1WT	5
3	Prom1Tet1WT	3
3	Prom1Tet1WT	13
3	Prom1Tet1WT	5
3	Prom1Tet1WT	6
3	Prom1Tet1WT	2
3	Prom1Tet1WT	8
3	Prom1Tet1WT	4
3	Prom1Tet1WT	4
3	Prom1Tet1WT	10
3	Prom1Tet1WT	7
3	Prom1Tet1WT	3
3	Prom1Tet1WT	4
3	Prom1Tet1WT	5
3	Prom1Tet1WT	17
3	Prom1Tet1WT	2
3	Prom1Tet1WT	4
3	Prom1Tet1WT	8
3	Prom1Tet1WT	11
3	Prom1Tet1WT	2
3	Prom1Tet1WT	19
3	Prom1Tet1WT	14
3	Prom1Tet1WT	7
3	Prom1Tet1WT	6
3	Prom1Tet1WT	17
3	Prom1Tet1WT	10
3	Prom1Tet1WT	6
3	Prom1Tet1WT	11
3	Prom1Tet1WT	7
3	Prom1Tet1WT	9
3	Prom1Tet1WT	18
3	Prom1Tet1WT	1
3	Prom1Tet1WT	1
3	Prom1Tet1WT	1
3	Prom1Tet1WT	1
3	Prom1Tet1WT	15
3	Prom1Tet1WT	14
3	Prom1Tet1WT	18
3	Prom1Tet1WT	8
3	Prom1Tet1WT	7
3	Prom1Tet1WT	5
3	Prom1Tet1WT	3
3	Prom1Tet1WT	8
3	Prom1Tet1WT	2
3	Prom1Tet1WT	16
3	Prom1Tet1WT	30
3	Prom1Tet1WT	8
3	Prom1Tet1WT	12
3	Prom1Tet1WT	6
3	Prom1Tet1WT	17
3	Prom1Tet1WT	2
3	Prom1Tet1WT	16
3	Prom1Tet1WT	15
3	Prom1Tet1WT	9
3	Prom1Tet1WT	5
3	Prom1Tet1WT	9
3	Prom1Tet1WT	7
3	Prom1Tet1WT	16
3	Prom1Tet1WT	4
3	Prom1Tet1WT	4
3	Prom1Tet1WT	25
3	Prom1Tet1WT	14
3	Prom1Tet1WT	2
3	Prom1Tet1WT	2
3	Prom1Tet1WT	3
3	Prom1Tet1WT	1
3	Prom1Tet1WT	2
3	Prom1Tet1WT	8
3	Prom1Tet1WT	9
3	Prom1Tet1WT	11
3	Prom1Tet1WT	2
3	Prom1Tet1WT	2
3	Prom1Tet1WT	27
3	Prom1Tet1WT	1
3	Prom1Tet1WT	1
3	Prom1Tet1WT	2
3	Prom1Tet1WT	2
3	Prom1Tet1WT	3
3	Prom1Tet1WT	59
3	Prom1Tet1WT	47
3	Prom1Tet1WT	7
3	Prom1Tet1WT	2
3	Prom1Tet1WT	4
3	Prom1Tet1WT	2
3	Prom1Tet1WT	51
3	Prom1Tet1WT	1
3	Prom1Tet1WT	1
3	Prom1Tet1WT	2
3	Prom1Tet1WT	1
3	Prom1Tet1WT	4
3	Prom1Tet1WT	3
3	Prom1Tet1WT	10
3	Prom1Tet1WT	8
3	Prom1Tet1WT	6
3	Prom1Tet1WT	4
3	Prom1Tet1WT	3
3	Prom1Tet1WT	1
3	Prom1Tet1WT	4
3	Prom1Tet1WT	25
3	Prom1Tet1WT	27
3	Prom1Tet1WT	2
3	Prom1Tet1WT	1
3	Prom1Tet1WT	1
3	Prom1Tet1WT	1
3	Prom1Tet1WT	1
3	Prom1Tet1WT	3
3	Prom1Tet1WT	4
3	Prom1Tet1WT	3
3	Prom1Tet1WT	2
3	Prom1Tet1WT	1
3	Prom1Tet1WT	3
3	Prom1Tet1WT	47
3	Prom1Tet1WT	2
3	Prom1Tet1WT	1
3	Prom1Tet1WT	1
3	Prom1Tet1WT	1
3	Prom1Tet1WT	1
3	Prom1Tet1WT	2
3	Prom1Tet1WT	2
3	Prom1Tet1WT	15
3	Prom1Tet1WT	13
3	Prom1Tet1WT	13
3	Prom1Tet1WT	8
3	Prom1Tet1WT	6
3	Prom1Tet1WT	4
3	Prom1Tet1WT	1
3	Prom1Tet1WT	4
3	Prom1Tet1WT	1
3	Prom1Tet1WT	1
3	Prom1Tet1WT	1
3	Prom1Tet1WT	1
3	Prom1Tet1WT	2
3	Prom1Tet1WT	1
3	Prom1Tet1WT	1
3	Prom1Tet1WT	2
3	Prom1Tet1WT	2
3	Prom1Tet1WT	22
3	Prom1Tet1WT	2
3	Prom1Tet1WT	3
3	Prom1Tet1WT	8
3	Prom1Tet1WT	5
3	Prom1Tet1WT	22
3	Prom1Tet1WT	13
3	Prom1Tet1WT	3
3	Prom1Tet1WT	17
3	Prom1Tet1WT	22
3	Prom1Tet1WT	40
3	Prom1Tet1WT	11
3	Prom1Tet1WT	7
3	Prom1Tet1WT	5
3	Prom1Tet1WT	11
3	Prom1Tet1WT	9
3	Prom1Tet1WT	9
3	Prom1Tet1WT	6
3	Prom1Tet1WT	11
3	Prom1Tet1WT	4
3	Prom1Tet1WT	11
3	Prom1Tet1WT	1
3	Prom1Tet1WT	1
3	Prom1Tet1WT	1
3	Prom1Tet1WT	1
3	Prom1Tet1WT	13
3	Prom1Tet1WT	6
3	Prom1Tet1WT	2
3	Prom1Tet1WT	1
3	Prom1Tet1WT	1
3	Prom1Tet1WT	1
3	Prom1Tet1WT	1
3	Prom1Tet1WT	5
3	Prom1Tet1WT	13
3	Prom1Tet1WT	15
3	Prom1Tet1WT	2
3	Prom1Tet1WT	4
3	Prom1Tet1WT	4
3	Prom1Tet1WT	1
3	Prom1Tet1WT	1
3	Prom1Tet1WT	1
3	Prom1Tet1WT	8
3	Prom1Tet1WT	5
3	Prom1Tet1WT	1
3	Prom1Tet1WT	15
3	Prom1Tet1WT	1
3	Prom1Tet1WT	1
3	Prom1Tet1WT	2
3	Prom1Tet1WT	5
3	Prom1Tet1WT	2
3	Prom1Tet1WT	3
3	Prom1Tet1WT	25
3	Prom1Tet1WT	6
3	Prom1Tet1WT	6
3	Prom1Tet1WT	3
3	Prom1Tet1WT	2
3	Prom1Tet1WT	20
3	Prom1Tet1WT	15
3	Prom1Tet1WT	3
3	Prom1Tet1WT	7
3	Prom1Tet1WT	2
3	Prom1Tet1WT	2
3	Prom1Tet1WT	20
3	Prom1Tet1WT	4
3	Prom1Tet1WT	8
3	Prom1Tet1WT	20
3	Prom1Tet1WT	15
3	Prom1Tet1WT	12
3	Prom1Tet1WT	9
3	Prom1Tet1WT	1
3	Prom1Tet1WT	5
3	Prom1Tet1WT	5
3	Prom1Tet1WT	5
3	Prom1Tet1WT	6
3	Prom1Tet1WT	9
3	Prom1Tet1WT	2
3	Prom1Tet1WT	19
3	Prom1Tet1WT	2
3	Prom1Tet1WT	5
3	Prom1Tet1WT	7
3	Prom1Tet1WT	2
3	Prom1Tet1WT	11
3	Prom1Tet1WT	21
3	Prom1Tet1WT	1
3	Prom1Tet1WT	1
3	Prom1Tet1WT	1
3	Prom1Tet1WT	23
3	Prom1Tet1WT	15
3	Prom1Tet1WT	30
3	Prom1Tet1WT	5
3	Prom1Tet1WT	4
3	Prom1Tet1WT	3
3	Prom1Tet1WT	13
3	Prom1Tet1WT	6
3	Prom1Tet1WT	7
3	Prom1Tet1WT	10
3	Prom1Tet1WT	9
3	Prom1Tet1WT	8
3	Prom1Tet1WT	13
3	Prom1Tet1WT	6
3	Prom1Tet1WT	6
3	Prom1Tet1WT	1
3	Prom1Tet1WT	15
3	Prom1Tet1WT	2
3	Prom1Tet1WT	2
3	Prom1Tet1WT	1
3	Prom1Tet1WT	1
3	Prom1Tet1WT	1
3	Prom1Tet1WT	1
3	Prom1Tet1WT	67
3	Prom1Tet1WT	20
3	Prom1Tet1WT	21
3	Prom1Tet1WT	5
1	Prom1ΔTet1	3
1	Prom1ΔTet1	2
1	Prom1ΔTet1	2
1	Prom1ΔTet1	2
1	Prom1ΔTet1	1
1	Prom1ΔTet1	1
1	Prom1ΔTet1	6
1	Prom1ΔTet1	2
1	Prom1ΔTet1	1
1	Prom1ΔTet1	1
1	Prom1ΔTet1	1
1	Prom1ΔTet1	1
1	Prom1ΔTet1	1
1	Prom1ΔTet1	32
1	Prom1ΔTet1	2
1	Prom1ΔTet1	2
1	Prom1ΔTet1	2
1	Prom1ΔTet1	2
1	Prom1ΔTet1	2
1	Prom1ΔTet1	2
1	Prom1ΔTet1	2
1	Prom1ΔTet1	1
1	Prom1ΔTet1	1
1	Prom1ΔTet1	1
1	Prom1ΔTet1	1
1	Prom1ΔTet1	1
1	Prom1ΔTet1	1
1	Prom1ΔTet1	3
1	Prom1ΔTet1	2
1	Prom1ΔTet1	2
1	Prom1ΔTet1	2
1	Prom1ΔTet1	2
1	Prom1ΔTet1	2
1	Prom1ΔTet1	1
1	Prom1ΔTet1	1
1	Prom1ΔTet1	1
1	Prom1ΔTet1	1
1	Prom1ΔTet1	1
1	Prom1ΔTet1	1
1	Prom1ΔTet1	3
1	Prom1ΔTet1	2
1	Prom1ΔTet1	2
1	Prom1ΔTet1	2
1	Prom1ΔTet1	2
1	Prom1ΔTet1	2
1	Prom1ΔTet1	1
1	Prom1ΔTet1	1
1	Prom1ΔTet1	1
1	Prom1ΔTet1	1
1	Prom1ΔTet1	3
1	Prom1ΔTet1	2
1	Prom1ΔTet1	2
1	Prom1ΔTet1	2
1	Prom1ΔTet1	2
1	Prom1ΔTet1	2
1	Prom1ΔTet1	1
1	Prom1ΔTet1	1
1	Prom1ΔTet1	1
1	Prom1ΔTet1	1
1	Prom1ΔTet1	2
1	Prom1ΔTet1	2
1	Prom1ΔTet1	2
1	Prom1ΔTet1	2
1	Prom1ΔTet1	2
1	Prom1ΔTet1	1
1	Prom1ΔTet1	1
1	Prom1ΔTet1	1
1	Prom1ΔTet1	1
1	Prom1ΔTet1	1
1	Prom1ΔTet1	1
1	Prom1ΔTet1	1
1	Prom1ΔTet1	1
1	Prom1ΔTet1	1
1	Prom1ΔTet1	3
1	Prom1ΔTet1	2
1	Prom1ΔTet1	2
1	Prom1ΔTet1	2
1	Prom1ΔTet1	2
1	Prom1ΔTet1	2
1	Prom1ΔTet1	2
1	Prom1ΔTet1	2
1	Prom1ΔTet1	2
1	Prom1ΔTet1	1
1	Prom1ΔTet1	1
1	Prom1ΔTet1	1
1	Prom1ΔTet1	4
1	Prom1ΔTet1	2
1	Prom1ΔTet1	2
1	Prom1ΔTet1	2
1	Prom1ΔTet1	2
1	Prom1ΔTet1	2
1	Prom1ΔTet1	1
1	Prom1ΔTet1	1
1	Prom1ΔTet1	1
1	Prom1ΔTet1	1
1	Prom1ΔTet1	3
1	Prom1ΔTet1	2
1	Prom1ΔTet1	2
1	Prom1ΔTet1	2
1	Prom1ΔTet1	1
1	Prom1ΔTet1	1
1	Prom1ΔTet1	1
1	Prom1ΔTet1	1
1	Prom1ΔTet1	1
1	Prom1ΔTet1	1
1	Prom1ΔTet1	1
1	Prom1ΔTet1	2
1	Prom1ΔTet1	1
1	Prom1ΔTet1	1
1	Prom1ΔTet1	1
1	Prom1ΔTet1	1
1	Prom1ΔTet1	1
1	Prom1ΔTet1	1
1	Prom1ΔTet1	1
1	Prom1ΔTet1	1
1	Prom1ΔTet1	2
1	Prom1ΔTet1	1
1	Prom1ΔTet1	1
1	Prom1ΔTet1	1
1	Prom1ΔTet1	1
1	Prom1ΔTet1	1
1	Prom1ΔTet1	1
1	Prom1ΔTet1	2
1	Prom1ΔTet1	2
1	Prom1ΔTet1	2
1	Prom1ΔTet1	2
1	Prom1ΔTet1	1
1	Prom1ΔTet1	1
1	Prom1ΔTet1	1
1	Prom1ΔTet1	1
1	Prom1ΔTet1	1
1	Prom1ΔTet1	6
1	Prom1ΔTet1	2
1	Prom1ΔTet1	1
1	Prom1ΔTet1	1
1	Prom1ΔTet1	1
1	Prom1ΔTet1	1
1	Prom1ΔTet1	1
1	Prom1ΔTet1	1
1	Prom1ΔTet1	1
1	Prom1ΔTet1	3
1	Prom1ΔTet1	2
1	Prom1ΔTet1	2
1	Prom1ΔTet1	2
1	Prom1ΔTet1	2
1	Prom1ΔTet1	2
1	Prom1ΔTet1	2
1	Prom1ΔTet1	2
1	Prom1ΔTet1	2
1	Prom1ΔTet1	1
1	Prom1ΔTet1	1
1	Prom1ΔTet1	1
1	Prom1ΔTet1	3
1	Prom1ΔTet1	2
1	Prom1ΔTet1	2
1	Prom1ΔTet1	2
1	Prom1ΔTet1	2
1	Prom1ΔTet1	1
1	Prom1ΔTet1	1
1	Prom1ΔTet1	1
1	Prom1ΔTet1	4
1	Prom1ΔTet1	2
1	Prom1ΔTet1	1
1	Prom1ΔTet1	1
1	Prom1ΔTet1	1
1	Prom1ΔTet1	1
1	Prom1ΔTet1	1
1	Prom1ΔTet1	5
1	Prom1ΔTet1	2
1	Prom1ΔTet1	2
1	Prom1ΔTet1	2
1	Prom1ΔTet1	1
1	Prom1ΔTet1	1
1	Prom1ΔTet1	1
1	Prom1ΔTet1	1
1	Prom1ΔTet1	1
1	Prom1ΔTet1	1
1	Prom1ΔTet1	7
1	Prom1ΔTet1	2
1	Prom1ΔTet1	2
1	Prom1ΔTet1	2
1	Prom1ΔTet1	1
1	Prom1ΔTet1	1
1	Prom1ΔTet1	1
1	Prom1ΔTet1	1
1	Prom1ΔTet1	1
1	Prom1ΔTet1	1
1	Prom1ΔTet1	1
1	Prom1ΔTet1	1
1	Prom1ΔTet1	1
1	Prom1ΔTet1	2
1	Prom1ΔTet1	2
1	Prom1ΔTet1	2
1	Prom1ΔTet1	1
1	Prom1ΔTet1	1
1	Prom1ΔTet1	1
1	Prom1ΔTet1	1
1	Prom1ΔTet1	1
1	Prom1ΔTet1	2
1	Prom1ΔTet1	2
1	Prom1ΔTet1	2
1	Prom1ΔTet1	2
1	Prom1ΔTet1	2
1	Prom1ΔTet1	1
1	Prom1ΔTet1	1
1	Prom1ΔTet1	1
1	Prom1ΔTet1	4
1	Prom1ΔTet1	2
1	Prom1ΔTet1	2
1	Prom1ΔTet1	2
1	Prom1ΔTet1	2
1	Prom1ΔTet1	2
1	Prom1ΔTet1	1
1	Prom1ΔTet1	1
1	Prom1ΔTet1	1
1	Prom1ΔTet1	1
1	Prom1ΔTet1	1
1	Prom1ΔTet1	1
1	Prom1ΔTet1	3
1	Prom1ΔTet1	2
1	Prom1ΔTet1	1
1	Prom1ΔTet1	1
1	Prom1ΔTet1	1
1	Prom1ΔTet1	1
1	Prom1ΔTet1	1
1	Prom1ΔTet1	1
1	Prom1ΔTet1	2
1	Prom1ΔTet1	2
1	Prom1ΔTet1	1
1	Prom1ΔTet1	1
1	Prom1ΔTet1	1
1	Prom1ΔTet1	1
1	Prom1ΔTet1	1
1	Prom1ΔTet1	1
1	Prom1ΔTet1	1
1	Prom1ΔTet1	1
1	Prom1ΔTet1	1
1	Prom1ΔTet1	1
1	Prom1ΔTet1	5
1	Prom1ΔTet1	3
1	Prom1ΔTet1	2
1	Prom1ΔTet1	2
1	Prom1ΔTet1	2
1	Prom1ΔTet1	1
1	Prom1ΔTet1	1
1	Prom1ΔTet1	1
1	Prom1ΔTet1	66
1	Prom1ΔTet1	12
1	Prom1ΔTet1	2
1	Prom1ΔTet1	2
1	Prom1ΔTet1	1
1	Prom1ΔTet1	1
1	Prom1ΔTet1	1
1	Prom1ΔTet1	1
1	Prom1ΔTet1	1
1	Prom1ΔTet1	2
1	Prom1ΔTet1	2
1	Prom1ΔTet1	2
1	Prom1ΔTet1	1
1	Prom1ΔTet1	1
1	Prom1ΔTet1	1
1	Prom1ΔTet1	1
1	Prom1ΔTet1	1
1	Prom1ΔTet1	1
1	Prom1ΔTet1	4
1	Prom1ΔTet1	2
1	Prom1ΔTet1	2
1	Prom1ΔTet1	2
1	Prom1ΔTet1	2
1	Prom1ΔTet1	2
1	Prom1ΔTet1	2
1	Prom1ΔTet1	2
1	Prom1ΔTet1	2
1	Prom1ΔTet1	1
1	Prom1ΔTet1	1
1	Prom1ΔTet1	1
1	Prom1ΔTet1	1
1	Prom1ΔTet1	1
1	Prom1ΔTet1	1
1	Prom1ΔTet1	1
1	Prom1ΔTet1	2
1	Prom1ΔTet1	2
1	Prom1ΔTet1	2
1	Prom1ΔTet1	2
1	Prom1ΔTet1	2
1	Prom1ΔTet1	2
1	Prom1ΔTet1	2
1	Prom1ΔTet1	2
1	Prom1ΔTet1	2
1	Prom1ΔTet1	2
1	Prom1ΔTet1	1
1	Prom1ΔTet1	1
1	Prom1ΔTet1	1
1	Prom1ΔTet1	1
1	Prom1ΔTet1	1
1	Prom1ΔTet1	1
1	Prom1ΔTet1	1
1	Prom1ΔTet1	1
1	Prom1ΔTet1	5
1	Prom1ΔTet1	3
1	Prom1ΔTet1	2
1	Prom1ΔTet1	2
1	Prom1ΔTet1	2
1	Prom1ΔTet1	2
1	Prom1ΔTet1	2
1	Prom1ΔTet1	2
1	Prom1ΔTet1	2
1	Prom1ΔTet1	2
1	Prom1ΔTet1	2
1	Prom1ΔTet1	2
1	Prom1ΔTet1	2
1	Prom1ΔTet1	1
1	Prom1ΔTet1	1
1	Prom1ΔTet1	1
1	Prom1ΔTet1	1
1	Prom1ΔTet1	4
1	Prom1ΔTet1	3
1	Prom1ΔTet1	2
1	Prom1ΔTet1	2
1	Prom1ΔTet1	2
1	Prom1ΔTet1	2
1	Prom1ΔTet1	2
1	Prom1ΔTet1	2
1	Prom1ΔTet1	2
1	Prom1ΔTet1	2
1	Prom1ΔTet1	2
1	Prom1ΔTet1	1
1	Prom1ΔTet1	1
1	Prom1ΔTet1	1
1	Prom1ΔTet1	1
1	Prom1ΔTet1	1
1	Prom1ΔTet1	1
1	Prom1ΔTet1	1
1	Prom1ΔTet1	1
1	Prom1ΔTet1	1
1	Prom1ΔTet1	1
1	Prom1ΔTet1	2
1	Prom1ΔTet1	2
1	Prom1ΔTet1	2
1	Prom1ΔTet1	2
1	Prom1ΔTet1	2
1	Prom1ΔTet1	2
1	Prom1ΔTet1	2
1	Prom1ΔTet1	2
1	Prom1ΔTet1	2
1	Prom1ΔTet1	1
1	Prom1ΔTet1	1
1	Prom1ΔTet1	2
1	Prom1ΔTet1	1
1	Prom1ΔTet1	1
1	Prom1ΔTet1	1
1	Prom1ΔTet1	3
1	Prom1ΔTet1	2
1	Prom1ΔTet1	1
1	Prom1ΔTet1	2
1	Prom1ΔTet1	2
1	Prom1ΔTet1	2
1	Prom1ΔTet1	2
1	Prom1ΔTet1	2
1	Prom1ΔTet1	1
1	Prom1ΔTet1	1
1	Prom1ΔTet1	1
1	Prom1ΔTet1	1
1	Prom1ΔTet1	1
1	Prom1ΔTet1	1
1	Prom1ΔTet1	1
1	Prom1ΔTet1	1
1	Prom1ΔTet1	1
1	Prom1ΔTet1	2
1	Prom1ΔTet1	2
1	Prom1ΔTet1	2
1	Prom1ΔTet1	2
1	Prom1ΔTet1	1
1	Prom1ΔTet1	1
1	Prom1ΔTet1	1
1	Prom1ΔTet1	1
1	Prom1ΔTet1	1
1	Prom1ΔTet1	1
1	Prom1ΔTet1	2
1	Prom1ΔTet1	2
1	Prom1ΔTet1	2
1	Prom1ΔTet1	1
1	Prom1ΔTet1	1
1	Prom1ΔTet1	1
1	Prom1ΔTet1	1
1	Prom1ΔTet1	1
1	Prom1ΔTet1	1
1	Prom1ΔTet1	1
1	Prom1ΔTet1	1
1	Prom1ΔTet1	29
1	Prom1ΔTet1	2
1	Prom1ΔTet1	2
1	Prom1ΔTet1	2
1	Prom1ΔTet1	1
1	Prom1ΔTet1	1
1	Prom1ΔTet1	1
1	Prom1ΔTet1	1
1	Prom1ΔTet1	1
1	Prom1ΔTet1	1
1	Prom1ΔTet1	2
1	Prom1ΔTet1	1
1	Prom1ΔTet1	1
1	Prom1ΔTet1	1
1	Prom1ΔTet1	1
1	Prom1ΔTet1	1
1	Prom1ΔTet1	2
1	Prom1ΔTet1	1
1	Prom1ΔTet1	1
1	Prom1ΔTet1	1
1	Prom1ΔTet1	1
1	Prom1ΔTet1	2
1	Prom1ΔTet1	2
1	Prom1ΔTet1	2
1	Prom1ΔTet1	1
1	Prom1ΔTet1	1
1	Prom1ΔTet1	1
1	Prom1ΔTet1	3
1	Prom1ΔTet1	2
1	Prom1ΔTet1	2
1	Prom1ΔTet1	2
1	Prom1ΔTet1	2
1	Prom1ΔTet1	1
1	Prom1ΔTet1	1
1	Prom1ΔTet1	1
1	Prom1ΔTet1	1
1	Prom1ΔTet1	1
1	Prom1ΔTet1	2
1	Prom1ΔTet1	2
1	Prom1ΔTet1	1
1	Prom1ΔTet1	1
1	Prom1ΔTet1	1
1	Prom1ΔTet1	1
1	Prom1ΔTet1	2
1	Prom1ΔTet1	2
1	Prom1ΔTet1	1
1	Prom1ΔTet1	1
1	Prom1ΔTet1	1
1	Prom1ΔTet1	1
1	Prom1ΔTet1	1
1	Prom1ΔTet1	2
1	Prom1ΔTet1	2
1	Prom1ΔTet1	2
1	Prom1ΔTet1	2
1	Prom1ΔTet1	1
1	Prom1ΔTet1	1
1	Prom1ΔTet1	1
1	Prom1ΔTet1	4
1	Prom1ΔTet1	3
1	Prom1ΔTet1	3
1	Prom1ΔTet1	2
1	Prom1ΔTet1	1
1	Prom1ΔTet1	4
1	Prom1ΔTet1	3
1	Prom1ΔTet1	2
1	Prom1ΔTet1	2
1	Prom1ΔTet1	1
1	Prom1ΔTet1	1
1	Prom1ΔTet1	1
1	Prom1ΔTet1	1
1	Prom1ΔTet1	1
1	Prom1ΔTet1	1
1	Prom1ΔTet1	1
1	Prom1ΔTet1	29
1	Prom1ΔTet1	2
1	Prom1ΔTet1	2
1	Prom1ΔTet1	2
1	Prom1ΔTet1	2
1	Prom1ΔTet1	1
1	Prom1ΔTet1	1
1	Prom1ΔTet1	1
1	Prom1ΔTet1	1
1	Prom1ΔTet1	80
1	Prom1ΔTet1	2
1	Prom1ΔTet1	2
1	Prom1ΔTet1	2
1	Prom1ΔTet1	2
1	Prom1ΔTet1	2
1	Prom1ΔTet1	1
1	Prom1ΔTet1	4
1	Prom1ΔTet1	2
1	Prom1ΔTet1	1
1	Prom1ΔTet1	1
1	Prom1ΔTet1	2
1	Prom1ΔTet1	2
1	Prom1ΔTet1	2
1	Prom1ΔTet1	2
1	Prom1ΔTet1	2
1	Prom1ΔTet1	1
1	Prom1ΔTet1	1
1	Prom1ΔTet1	1
1	Prom1ΔTet1	1
1	Prom1ΔTet1	1
1	Prom1ΔTet1	1
1	Prom1ΔTet1	4
1	Prom1ΔTet1	2
1	Prom1ΔTet1	2
1	Prom1ΔTet1	2
1	Prom1ΔTet1	2
1	Prom1ΔTet1	2
1	Prom1ΔTet1	2
1	Prom1ΔTet1	1
1	Prom1ΔTet1	1
1	Prom1ΔTet1	1
1	Prom1ΔTet1	1
1	Prom1ΔTet1	1
1	Prom1ΔTet1	2
1	Prom1ΔTet1	1
1	Prom1ΔTet1	1
1	Prom1ΔTet1	1
1	Prom1ΔTet1	1
1	Prom1ΔTet1	5
1	Prom1ΔTet1	3
1	Prom1ΔTet1	2
1	Prom1ΔTet1	2
1	Prom1ΔTet1	2
1	Prom1ΔTet1	2
1	Prom1ΔTet1	1
1	Prom1ΔTet1	1
1	Prom1ΔTet1	1
1	Prom1ΔTet1	1
1	Prom1ΔTet1	1
1	Prom1ΔTet1	1
2	Prom1ΔTet1	2
2	Prom1ΔTet1	2
2	Prom1ΔTet1	1
2	Prom1ΔTet1	1
2	Prom1ΔTet1	1
2	Prom1ΔTet1	1
2	Prom1ΔTet1	1
2	Prom1ΔTet1	2
2	Prom1ΔTet1	1
2	Prom1ΔTet1	1
2	Prom1ΔTet1	2
2	Prom1ΔTet1	1
2	Prom1ΔTet1	1
2	Prom1ΔTet1	2
2	Prom1ΔTet1	1
2	Prom1ΔTet1	1
2	Prom1ΔTet1	1
2	Prom1ΔTet1	7
2	Prom1ΔTet1	2
2	Prom1ΔTet1	2
2	Prom1ΔTet1	1
2	Prom1ΔTet1	1
2	Prom1ΔTet1	1
2	Prom1ΔTet1	4
2	Prom1ΔTet1	2
2	Prom1ΔTet1	1
2	Prom1ΔTet1	1
2	Prom1ΔTet1	1
2	Prom1ΔTet1	5
2	Prom1ΔTet1	2
2	Prom1ΔTet1	1
2	Prom1ΔTet1	1
2	Prom1ΔTet1	1
2	Prom1ΔTet1	1
2	Prom1ΔTet1	1
2	Prom1ΔTet1	1
2	Prom1ΔTet1	1
2	Prom1ΔTet1	1
2	Prom1ΔTet1	2
2	Prom1ΔTet1	1
2	Prom1ΔTet1	1
2	Prom1ΔTet1	1
2	Prom1ΔTet1	2
2	Prom1ΔTet1	2
2	Prom1ΔTet1	1
2	Prom1ΔTet1	1
2	Prom1ΔTet1	1
2	Prom1ΔTet1	2
2	Prom1ΔTet1	1
2	Prom1ΔTet1	2
2	Prom1ΔTet1	1
2	Prom1ΔTet1	1
2	Prom1ΔTet1	6
2	Prom1ΔTet1	2
2	Prom1ΔTet1	1
2	Prom1ΔTet1	1
2	Prom1ΔTet1	5
2	Prom1ΔTet1	1
2	Prom1ΔTet1	2
2	Prom1ΔTet1	2
2	Prom1ΔTet1	1
2	Prom1ΔTet1	1
2	Prom1ΔTet1	1
2	Prom1ΔTet1	2
2	Prom1ΔTet1	2
2	Prom1ΔTet1	2
2	Prom1ΔTet1	1
2	Prom1ΔTet1	1
2	Prom1ΔTet1	1
2	Prom1ΔTet1	1
2	Prom1ΔTet1	1
2	Prom1ΔTet1	1
2	Prom1ΔTet1	1
2	Prom1ΔTet1	1
2	Prom1ΔTet1	3
2	Prom1ΔTet1	1
2	Prom1ΔTet1	1
2	Prom1ΔTet1	1
2	Prom1ΔTet1	2
2	Prom1ΔTet1	1
2	Prom1ΔTet1	1
2	Prom1ΔTet1	1
2	Prom1ΔTet1	1
2	Prom1ΔTet1	1
2	Prom1ΔTet1	4
2	Prom1ΔTet1	2
2	Prom1ΔTet1	2
2	Prom1ΔTet1	1
2	Prom1ΔTet1	1
2	Prom1ΔTet1	1
2	Prom1ΔTet1	5
2	Prom1ΔTet1	1
2	Prom1ΔTet1	2
2	Prom1ΔTet1	2
2	Prom1ΔTet1	1
2	Prom1ΔTet1	1
2	Prom1ΔTet1	2
2	Prom1ΔTet1	2
2	Prom1ΔTet1	1
2	Prom1ΔTet1	1
2	Prom1ΔTet1	2
2	Prom1ΔTet1	2
2	Prom1ΔTet1	1
2	Prom1ΔTet1	1
2	Prom1ΔTet1	2
2	Prom1ΔTet1	2
2	Prom1ΔTet1	2
2	Prom1ΔTet1	2
2	Prom1ΔTet1	2
2	Prom1ΔTet1	3
2	Prom1ΔTet1	2
2	Prom1ΔTet1	2
2	Prom1ΔTet1	2
2	Prom1ΔTet1	2
2	Prom1ΔTet1	2
2	Prom1ΔTet1	1
2	Prom1ΔTet1	2
2	Prom1ΔTet1	1
2	Prom1ΔTet1	1
2	Prom1ΔTet1	1
2	Prom1ΔTet1	3
2	Prom1ΔTet1	2
2	Prom1ΔTet1	2
2	Prom1ΔTet1	2
2	Prom1ΔTet1	1
2	Prom1ΔTet1	2
2	Prom1ΔTet1	2
2	Prom1ΔTet1	2
2	Prom1ΔTet1	1
2	Prom1ΔTet1	1
2	Prom1ΔTet1	1
2	Prom1ΔTet1	4
2	Prom1ΔTet1	3
2	Prom1ΔTet1	2
2	Prom1ΔTet1	2
2	Prom1ΔTet1	1
2	Prom1ΔTet1	1
2	Prom1ΔTet1	2
2	Prom1ΔTet1	25
2	Prom1ΔTet1	2
2	Prom1ΔTet1	1
2	Prom1ΔTet1	1
2	Prom1ΔTet1	1
2	Prom1ΔTet1	6
2	Prom1ΔTet1	2
2	Prom1ΔTet1	2
2	Prom1ΔTet1	2
3	Prom1ΔTet1	3
3	Prom1ΔTet1	2
3	Prom1ΔTet1	1
3	Prom1ΔTet1	9
3	Prom1ΔTet1	3
3	Prom1ΔTet1	2
3	Prom1ΔTet1	2
3	Prom1ΔTet1	2
3	Prom1ΔTet1	2
3	Prom1ΔTet1	2
3	Prom1ΔTet1	1
3	Prom1ΔTet1	1
3	Prom1ΔTet1	1
3	Prom1ΔTet1	1
3	Prom1ΔTet1	1
3	Prom1ΔTet1	1
3	Prom1ΔTet1	3
3	Prom1ΔTet1	3
3	Prom1ΔTet1	2
3	Prom1ΔTet1	1
3	Prom1ΔTet1	3
3	Prom1ΔTet1	2
3	Prom1ΔTet1	1
3	Prom1ΔTet1	1
3	Prom1ΔTet1	1
3	Prom1ΔTet1	2
3	Prom1ΔTet1	1
3	Prom1ΔTet1	1
3	Prom1ΔTet1	1
3	Prom1ΔTet1	1
3	Prom1ΔTet1	2
3	Prom1ΔTet1	24
3	Prom1ΔTet1	10
3	Prom1ΔTet1	2
3	Prom1ΔTet1	1
3	Prom1ΔTet1	1
3	Prom1ΔTet1	1
3	Prom1ΔTet1	1
3	Prom1ΔTet1	2
3	Prom1ΔTet1	1
3	Prom1ΔTet1	2
3	Prom1ΔTet1	2
3	Prom1ΔTet1	2
3	Prom1ΔTet1	2
3	Prom1ΔTet1	1
3	Prom1ΔTet1	1
3	Prom1ΔTet1	10
3	Prom1ΔTet1	2
3	Prom1ΔTet1	1
3	Prom1ΔTet1	4
3	Prom1ΔTet1	2
3	Prom1ΔTet1	2
3	Prom1ΔTet1	2
3	Prom1ΔTet1	1
3	Prom1ΔTet1	1
3	Prom1ΔTet1	1
3	Prom1ΔTet1	6
3	Prom1ΔTet1	2
3	Prom1ΔTet1	2
3	Prom1ΔTet1	2
3	Prom1ΔTet1	1
3	Prom1ΔTet1	1
3	Prom1ΔTet1	1
3	Prom1ΔTet1	5
3	Prom1ΔTet1	3
3	Prom1ΔTet1	1
3	Prom1ΔTet1	4
3	Prom1ΔTet1	2
3	Prom1ΔTet1	2
3	Prom1ΔTet1	2
3	Prom1ΔTet1	1
3	Prom1ΔTet1	4
3	Prom1ΔTet1	2
3	Prom1ΔTet1	1
3	Prom1ΔTet1	1
3	Prom1ΔTet1	4
3	Prom1ΔTet1	2
3	Prom1ΔTet1	2
3	Prom1ΔTet1	2
3	Prom1ΔTet1	1
3	Prom1ΔTet1	1
3	Prom1ΔTet1	12
3	Prom1ΔTet1	2
3	Prom1ΔTet1	2
3	Prom1ΔTet1	1
3	Prom1ΔTet1	8
3	Prom1ΔTet1	2
3	Prom1ΔTet1	2
3	Prom1ΔTet1	2
3	Prom1ΔTet1	1
3	Prom1ΔTet1	1
3	Prom1ΔTet1	1
3	Prom1ΔTet1	1
3	Prom1ΔTet1	1
3	Prom1ΔTet1	2
3	Prom1ΔTet1	1
3	Prom1ΔTet1	1
3	Prom1ΔTet1	1
3	Prom1ΔTet1	49
3	Prom1ΔTet1	25
3	Prom1ΔTet1	1
3	Prom1ΔTet1	11
3	Prom1ΔTet1	5
3	Prom1ΔTet1	2
3	Prom1ΔTet1	8
3	Prom1ΔTet1	1
3	Prom1ΔTet1	1
3	Prom1ΔTet1	1
3	Prom1ΔTet1	8
3	Prom1ΔTet1	5
3	Prom1ΔTet1	1
3	Prom1ΔTet1	2
3	Prom1ΔTet1	2
3	Prom1ΔTet1	2
3	Prom1ΔTet1	1
3	Prom1ΔTet1	1
3	Prom1ΔTet1	2
3	Prom1ΔTet1	2
3	Prom1ΔTet1	2
3	Prom1ΔTet1	2
3	Prom1ΔTet1	1
3	Prom1ΔTet1	1
3	Prom1ΔTet1	1
3	Prom1ΔTet1	6
3	Prom1ΔTet1	2
3	Prom1ΔTet1	2
3	Prom1ΔTet1	2
3	Prom1ΔTet1	8
3	Prom1ΔTet1	1
3	Prom1ΔTet1	1
3	Prom1ΔTet1	1
3	Prom1ΔTet1	1
3	Prom1ΔTet1	2
3	Prom1ΔTet1	1
3	Prom1ΔTet1	1
3	Prom1ΔTet1	1
3	Prom1ΔTet1	2
3	Prom1ΔTet1	1
3	Prom1ΔTet1	1
3	Prom1ΔTet1	1
3	Prom1ΔTet1	7
3	Prom1ΔTet1	2
3	Prom1ΔTet1	2
3	Prom1ΔTet1	1
3	Prom1ΔTet1	1
3	Prom1ΔTet1	1
3	Prom1ΔTet1	8
3	Prom1ΔTet1	3
3	Prom1ΔTet1	5
3	Prom1ΔTet1	2
3	Prom1ΔTet1	2
3	Prom1ΔTet1	1
3	Prom1ΔTet1	1
3	Prom1ΔTet1	1
3	Prom1ΔTet1	1
3	Prom1ΔTet1	1
3	Prom1ΔTet1	1
3	Prom1ΔTet1	2
3	Prom1ΔTet1	7
3	Prom1ΔTet1	2
3	Prom1ΔTet1	1
3	Prom1ΔTet1	5
3	Prom1ΔTet1	2
3	Prom1ΔTet1	2
3	Prom1ΔTet1	1
3	Prom1ΔTet1	3
3	Prom1ΔTet1	1
3	Prom1ΔTet1	1
3	Prom1ΔTet1	2
3	Prom1ΔTet1	2
3	Prom1ΔTet1	14
3	Prom1ΔTet1	2
3	Prom1ΔTet1	1
3	Prom1ΔTet1	1
3	Prom1ΔTet1	1
3	Prom1ΔTet1	2
3	Prom1ΔTet1	2
3	Prom1ΔTet1	1
3	Prom1ΔTet1	1
3	Prom1ΔTet1	2
3	Prom1ΔTet1	1
3	Prom1ΔTet1	1
3	Prom1ΔTet1	2
3	Prom1ΔTet1	2
3	Prom1ΔTet1	1
3	Prom1ΔTet1	15
3	Prom1ΔTet1	10
3	Prom1ΔTet1	4
3	Prom1ΔTet1	1
3	Prom1ΔTet1	1
3	Prom1ΔTet1	3
3	Prom1ΔTet1	2
3	Prom1ΔTet1	2
3	Prom1ΔTet1	2
3	Prom1ΔTet1	1
3	Prom1ΔTet1	1
3	Prom1ΔTet1	1
3	Prom1ΔTet1	1
3	Prom1ΔTet1	1
3	Prom1ΔTet1	2
3	Prom1ΔTet1	2
3	Prom1ΔTet1	1
3	Prom1ΔTet1	1
3	Prom1ΔTet1	1
3	Prom1ΔTet1	2
3	Prom1ΔTet1	1
3	Prom1ΔTet1	5
3	Prom1ΔTet1	2
3	Prom1ΔTet1	2
3	Prom1ΔTet1	2
3	Prom1ΔTet1	1
3	Prom1ΔTet1	1
3	Prom1ΔTet1	3
3	Prom1ΔTet1	2
3	Prom1ΔTet1	2
3	Prom1ΔTet1	2
4	Prom1ΔTet1	1
4	Prom1ΔTet1	2
4	Prom1ΔTet1	3
4	Prom1ΔTet1	2
4	Prom1ΔTet1	1
4	Prom1ΔTet1	1
5	Prom1ΔTet1	2
5	Prom1ΔTet1	2
5	Prom1ΔTet1	2
5	Prom1ΔTet1	2
5	Prom1ΔTet1	2
5	Prom1ΔTet1	2
5	Prom1ΔTet1	2
5	Prom1ΔTet1	2
5	Prom1ΔTet1	1
5	Prom1ΔTet1	1
5	Prom1ΔTet1	1
5	Prom1ΔTet1	1
5	Prom1ΔTet1	3
5	Prom1ΔTet1	2
5	Prom1ΔTet1	2
5	Prom1ΔTet1	2
5	Prom1ΔTet1	2
5	Prom1ΔTet1	2
5	Prom1ΔTet1	2
5	Prom1ΔTet1	2
5	Prom1ΔTet1	1
5	Prom1ΔTet1	1
5	Prom1ΔTet1	1
5	Prom1ΔTet1	1
5	Prom1ΔTet1	1
5	Prom1ΔTet1	1
5	Prom1ΔTet1	6
5	Prom1ΔTet1	2
5	Prom1ΔTet1	2
5	Prom1ΔTet1	1
5	Prom1ΔTet1	1
5	Prom1ΔTet1	1
5	Prom1ΔTet1	7
5	Prom1ΔTet1	5
5	Prom1ΔTet1	3
5	Prom1ΔTet1	2
5	Prom1ΔTet1	2
5	Prom1ΔTet1	2
5	Prom1ΔTet1	2
5	Prom1ΔTet1	2
5	Prom1ΔTet1	1
5	Prom1ΔTet1	1
5	Prom1ΔTet1	1
5	Prom1ΔTet1	1
5	Prom1ΔTet1	1
5	Prom1ΔTet1	1
5	Prom1ΔTet1	1
5	Prom1ΔTet1	18
5	Prom1ΔTet1	2
5	Prom1ΔTet1	2
5	Prom1ΔTet1	1
5	Prom1ΔTet1	1
5	Prom1ΔTet1	1
5	Prom1ΔTet1	1
5	Prom1ΔTet1	1
5	Prom1ΔTet1	1
5	Prom1ΔTet1	1
5	Prom1ΔTet1	1
5	Prom1ΔTet1	1
5	Prom1ΔTet1	1
5	Prom1ΔTet1	1
5	Prom1ΔTet1	3
5	Prom1ΔTet1	3
5	Prom1ΔTet1	3
5	Prom1ΔTet1	1
5	Prom1ΔTet1	1
5	Prom1ΔTet1	1
5	Prom1ΔTet1	1
5	Prom1ΔTet1	1
5	Prom1ΔTet1	3
5	Prom1ΔTet1	2
5	Prom1ΔTet1	2
5	Prom1ΔTet1	2
5	Prom1ΔTet1	2
5	Prom1ΔTet1	2
5	Prom1ΔTet1	2
5	Prom1ΔTet1	2
5	Prom1ΔTet1	1
5	Prom1ΔTet1	1
5	Prom1ΔTet1	1
5	Prom1ΔTet1	1
5	Prom1ΔTet1	1
5	Prom1ΔTet1	4
5	Prom1ΔTet1	3
5	Prom1ΔTet1	3
5	Prom1ΔTet1	2
5	Prom1ΔTet1	2
5	Prom1ΔTet1	2
5	Prom1ΔTet1	2
5	Prom1ΔTet1	2
5	Prom1ΔTet1	2
5	Prom1ΔTet1	2
5	Prom1ΔTet1	2
5	Prom1ΔTet1	1
5	Prom1ΔTet1	1
5	Prom1ΔTet1	1
5	Prom1ΔTet1	1
5	Prom1ΔTet1	1
5	Prom1ΔTet1	1
5	Prom1ΔTet1	4
5	Prom1ΔTet1	3
5	Prom1ΔTet1	2
5	Prom1ΔTet1	2
5	Prom1ΔTet1	2
5	Prom1ΔTet1	2
5	Prom1ΔTet1	2
5	Prom1ΔTet1	2
5	Prom1ΔTet1	1
5	Prom1ΔTet1	1
5	Prom1ΔTet1	1
5	Prom1ΔTet1	1
5	Prom1ΔTet1	1
5	Prom1ΔTet1	1
5	Prom1ΔTet1	1
5	Prom1ΔTet1	1
5	Prom1ΔTet1	6
5	Prom1ΔTet1	3
5	Prom1ΔTet1	3
5	Prom1ΔTet1	2
5	Prom1ΔTet1	2
5	Prom1ΔTet1	2
5	Prom1ΔTet1	2
5	Prom1ΔTet1	2
5	Prom1ΔTet1	2
5	Prom1ΔTet1	2
5	Prom1ΔTet1	2
5	Prom1ΔTet1	1
5	Prom1ΔTet1	1
5	Prom1ΔTet1	1
5	Prom1ΔTet1	1
5	Prom1ΔTet1	1
5	Prom1ΔTet1	1
5	Prom1ΔTet1	1
5	Prom1ΔTet1	1
5	Prom1ΔTet1	9
5	Prom1ΔTet1	8
5	Prom1ΔTet1	5
5	Prom1ΔTet1	3
5	Prom1ΔTet1	3
5	Prom1ΔTet1	2
5	Prom1ΔTet1	2
5	Prom1ΔTet1	2
5	Prom1ΔTet1	2
5	Prom1ΔTet1	2
5	Prom1ΔTet1	2
5	Prom1ΔTet1	2
5	Prom1ΔTet1	2
5	Prom1ΔTet1	2
5	Prom1ΔTet1	1
5	Prom1ΔTet1	1
5	Prom1ΔTet1	1
5	Prom1ΔTet1	1
5	Prom1ΔTet1	1
5	Prom1ΔTet1	1
5	Prom1ΔTet1	1
5	Prom1ΔTet1	1
5	Prom1ΔTet1	1
5	Prom1ΔTet1	4
5	Prom1ΔTet1	3
5	Prom1ΔTet1	3
5	Prom1ΔTet1	2
5	Prom1ΔTet1	2
5	Prom1ΔTet1	2
5	Prom1ΔTet1	2
5	Prom1ΔTet1	2
5	Prom1ΔTet1	2
5	Prom1ΔTet1	2
5	Prom1ΔTet1	2
5	Prom1ΔTet1	2
5	Prom1ΔTet1	2
5	Prom1ΔTet1	2
5	Prom1ΔTet1	2
5	Prom1ΔTet1	2
5	Prom1ΔTet1	2
5	Prom1ΔTet1	1
5	Prom1ΔTet1	1
5	Prom1ΔTet1	1
5	Prom1ΔTet1	1
5	Prom1ΔTet1	1
5	Prom1ΔTet1	1
5	Prom1ΔTet1	1
5	Prom1ΔTet1	1
5	Prom1ΔTet1	1
5	Prom1ΔTet1	1
5	Prom1ΔTet1	1
5	Prom1ΔTet1	1
5	Prom1ΔTet1	4
5	Prom1ΔTet1	3
5	Prom1ΔTet1	2
5	Prom1ΔTet1	2
5	Prom1ΔTet1	2
5	Prom1ΔTet1	2
[truncated: 736 more rows]
