# Supplementary material for: Epigenetic remodelling licences adult cholangiocytes for organoid formation and liver regeneration
Source: Springer Nature journal article supplement (doi:10.1038/s41556-019-0402-6), 2019-11-01
Supplement: MOESM19 [file 41556_2019_402_MOESM19_ESM.xlsx]

## Sheet: Sheet1
Extended Data Figure 02
All data Raw are available in GSE123133. Processed data and gene lists are available in Supplementary Datasets 1-4
